# Supplementary material for: Evaluation of ultra-deep targeted sequencing for personalized breast cancer care
Source: PubMed Central journal article supplement (PMC3978701; doi:10.1186/bcr3584), 2013-12-10
Supplement: bcr3584-S1.pdf [file bcr3584-S1.pdf]

**Table S1: Source and histo-pathologic description of the 38 specimens studied**

| Sample ID  | Sample source    | ER  | PR  | Her2      |     | Histology of primary site* | Nottingham grade | Histology |          |        |             |          |
|------------|------------------|-----|-----|-----------|-----|----------------------------|------------------|-----------|----------|--------|-------------|----------|
|            |                  |     |     | ISH ratio | IHC |                            |                  | In Situ   | Invasive | Stroma | Immune Cell | Necrosis |
| AA0948     | Lumpectomy       | >80 | <5  | 1.05      | 1+  | IDC                        | I                | 0%        | 20%      | 70%    | 10%         | 0%       |
| AA0930     | Lumpectomy       | 90  | 50  | NA        | 0   | IDC + LF                   | I                | 0%        | 25%      | 75%    | 0%          | 0%       |
| UCI2219330 | Lumpectomy       | 100 | 0   | NA        |     | IDC                        | I                | 0%        | 35%      | 60%    | 5%          | 0%       |
| UCI2076630 | Mastectomy       | 95  | 20  | 2.8       |     | IDC                        | I                | 5%        | 45%      | 30%    | 20%         | 0%       |
| AA0960     | Lumpectomy       | 80  | <10 |           | 0   | IDC                        | I                | 0%        | 60%      | 40%    | 0%          | 0%       |
| UCI1804937 | Mastectomy       | 100 | 50  | 1.2       |     | IDC                        | I                | 0%        | 65%      | 30%    | 5%          | 0%       |
| AA0957     | Mastectomy       | 100 | 50  |           | 0   | IDC + DCIS                 | I                | 10%       | 70%      | 20%    | 0%          | 0%       |
| AA0926     | Lumpectomy       | 90  | 50  | 1.47      |     | IDC                        | I                | 0%        | 90%      | 5%     | 5%          | 0%       |
| UCI1951813 | Mastectomy       | 100 | 0   | 1         |     | IDC                        | II               | 0%        | 10%      | 75%    | 5%          | 10%      |
| UCI2649875 | Lumpectomy       | 95  | 40  | 1.1       |     | IDC                        | II               | 0%        | 25%      | 50%    | 5%          | 20%      |
| AA1267     | Lumpectomy       | 100 | 95  | 1.05      | 2+  | IDC+LF                     | II               | 0%        | 30%      | 65%    | 5%          | 0%       |
| UCI1546879 | Mastectomy       | 70  | 0   | 1.5       |     | IDC                        | II               | 10%       | 25%      | 50%    | 5%          | 10%      |
| AA1090     | Lumpectomy       | 100 | <5  |           | 0   | IDC                        | II               | 0%        | 40%      | 50%    | 10%         | 0%       |
| UCI2564879 | Mastectomy       | 90  | 90  | 1.2       |     | IDC                        | II               | 20%       | 30%      | 40%    | 5%          | 5%       |
| UCI8965412 | Mastectomy       | 80  | 90  | 6.7       |     | IDC                        | II               | 10%       | 45%      | 30%    | 5%          | 10%      |
| UCI1908503 | Lymphadenectomy  | 0   | 0   | 7.7       |     | IDC                        | II               | 0%        | 60%      | 10%    | 10%         | 20%      |
| UCI9135402 | Mastectomy       | 90  | 90  | 1.4       |     | IDC+LF                     | II               | 10%       | 50%      | 35%    | 5%          | 0%       |
| AA1025     | Mastectomy       | 100 | 30  |           | 0   | IDC+LF+ DCIS               | II               | 10%       | 50%      | 20%    | 10%         | 10%      |
| AA1188     | Mastectomy       | 85  | 25  |           | 0   | ILC +LCIS                  | II               | 10%       | 50%      | 35%    | 5%          | 0%       |
| UCI2224680 | Mastectomy       | 90  | 80  | 1.2       |     | IDC                        | II               | 0%        | 70%      | 25%    | 5%          | 0%       |
| UCI1689380 | Lumpectomy       | 100 | 70  | 1.3       |     | IDC                        | II               | 0%        | 75%      | 20%    | 5%          | 0%       |
| UCI3165498 | Mastectomy       | 100 | 95  | 1.4       |     | IDC                        | II               | 0%        | 75%      | 15%    | 10%         | 0%       |
| UCI2231576 | Mastectomy       | 100 | 100 | 1.4       |     | IDC                        | II               | 0%        | 80%      | 15%    | 5%          | 0%       |
| AA0952     | Lumpectomy       | 95  | 30  |           | 0   | IDC                        | II               | 0%        | 90%      | 5%     | 5%          | 0%       |
| AA0943     | Lumpectomy       | >90 | 30  | 1.4       |     | IDC+LF                     | III              | 0%        | 20%      | 75%    | 5%          | 0%       |
| AA1204     | Mastectomy       | 0   | 0   |           | 3+  | DCIS                       | III              | 20%       | 0%       | 70%    | 10%         | 0%       |
| UCI3564897 | Mastectomy       | 0   | 0   | 2.3       |     | IDC                        | III              | 20%       | 10%      | 0%     | 70%         | 0%       |
| UCI1821517 | Lumpectomy       | 0   | 0   | 1.1       |     | IDC                        | III              | 0%        | 40%      | 40%    | 20%         | 0%       |
| AA1307     | Lumpectomy       | 0   | 0   |           | 0   | IDC                        | III              | 0%        | 40%      | 0%     | 10%         | 50%      |
| AA1367     | Mastectomy       | 0   | 0   | 1.3       | 1+  | IDC                        | III              | 0%        | 50%      | 40%    | 5%          | 5%       |
| AA1077     | Mastectomy       | 100 | 0   |           | 0   | IDC                        | III              | 0%        | 70%      | 30%    | 0%          | 0%       |
| AA1247     | Mastectomy       | 0   | 0   |           | 3+  | IDC                        | III              | 0%        | 70%      | 30%    | 0%          | 0%       |
| AA1277     | Mastectomy       | 0   | 0   |           | 0   | IDC                        | III              | 0%        | 70%      | 30%    | 0%          | 0%       |
| AA1222     | Lumpectomy       | 90  | 60  | 3.5       | 2+  | IDC+LF                     | III              | 0%        | 80%      | 10%    | 10%         | 0%       |
| AA1106     | Mastectomy       | 100 | 5   |           | 0   | ILC +LCIS                  | III              | 10%       | 80%      | 5%     | 5%          | 0%       |
| UCI2008866 | Mastectomy       | 0   | 0   | 1.4       |     | IDC                        | III              | 0%        | 97%      | 1%     | 1%          | 1%       |
| UCI4216548 | Brain metastasis | 0   | 0   | 1.1       |     | IDC                        | NA               | 0%        | 50%      | 35%    | 5%          | 10%      |
| AA1515     | Liver metastasis | 100 | 30  | 1         | 1+  | IDC+DCIS                   | NA               | 0%        | 50%      | 40%    | 10%         | 0%       |

\* IDC: Invasive Ductal Carcinoma; DCIS: Ductal Carcinoma In Situ; LF: Lobular features; ILC: Invasive Lobular Carcinoma; LCIS, Lobular Carcinoma In Situ

**Table S2: List of Primers used in the study**

| Primer ID         | Amplificons coordinates (hg19) | Primer sequence (without UDT-Seq tail) |
|-------------------|--------------------------------|----------------------------------------|
| RB1.11.14.RB1.1_F | chr13:48942526-48942776        | GCAGCAGCTGGGTCATCTAT                   |
| RB1.11.14.RB1.1_R | chr13:48942526-48942776        | TGAAACACTATAAAGCCATGAATAACA            |
| RB1.7.14.RB1.1_F  | chr13:48934101-48934338        | TCTACCTCGCGATTTTCTCTCA                 |
| RB1.7.14.RB1.1_R  | chr13:48934101-48934338        | TCCTGTCCAGCCTTAGAACCA                  |
| RB1.26.1.RB1.1_F  | chr13:49051432-49051585        | CGAAAGCATCATAGTTACTGGA                 |
| RB1.26.1.RB1.1_R  | chr13:49051432-49051585        | CGAAAAGACTTCTTGCAGTGT                  |
| RB1.2.14.RB1.1_F  | chr13:48881426-48881667        | TTTTTCATTTGGTAGGCTTGAGTTT              |
| RB1.2.14.RB1.1_R  | chr13:48881426-48881667        | AGCAGAGGTAAATTCCTCTGGG                 |
| RB1.2.15.RB1.2_F  | chr13:48881341-48881484        | CACAGTAGTGTATGTGCAAAC                  |
| RB1.2.15.RB1.2_R  | chr13:48881341-48881484        | ACCAAGCTCTCTCTGACA                     |
| RB1.17.5.RB1.1_F  | chr13:48955446-48955604        | CCCATGGATTCTGAATGTGC                   |
| RB1.17.5.RB1.1_R  | chr13:48955446-48955604        | AGCCATATGCACATGAATGAA                  |
| RB1.17.6.RB1.2_F  | chr13:48955344-48955495        | AAAAATACCTAGCTCAAGGGTT                 |
| RB1.17.6.RB1.2_R  | chr13:48955344-48955495        | CTTGTCAGGTTGCCCTTCTGC                  |
| RB1.22.1.RB1.1_F  | chr13:49039141-49039283        | ACTGTTCTTCTCAGACATTCA                  |
| RB1.22.1.RB1.1_R  | chr13:49039141-49039283        | GTTTTGGTGGACCCATTACA                   |
| RB1.22.11.RB1.2_F | chr13:49039023-49039149        | TGTGCTTCTTACCAGTCAAAA                  |
| RB1.22.11.RB1.2_R | chr13:49039023-49039149        | GAATCATACTCCCTTCTTTGATCA               |
| RB1.1.7.RB1.1_F   | chr13:48878026-48878180        | CTCCTCCACAGCTCGCT                      |
| RB1.1.7.RB1.1_R   | chr13:48878026-48878180        | CTGCTCGCTCACCTGAC                      |
| RB1.1.8.RB1.2_F   | chr13:48878026-48878185        | CTCCTCCACAGCTCGCT                      |
| RB1.1.8.RB1.2_R   | chr13:48878026-48878185        | GGCTCTGCTCGCTCAC                       |
| RB1.18.9.RB1.1_F  | chr13:49027137-49027266        | CATCATGTTTCATATAGGATTCACC              |
| RB1.18.9.RB1.1_R  | chr13:49027137-49027266        | TGCAGTTTGAATGGTCAACA                   |
| RB1.18.10.RB1.2_F | chr13:49027026-49027173        | ATTGCCACTGTCAATTGTGC                   |
| RB1.18.10.RB1.2_R | chr13:49027026-49027173        | TCAAGGTGATCAGTTGGTCC                   |
| RB1.16.14.RB1.1_F | chr13:48954201-48954434        | TCTGTTTCAGGAAGAAGAACGA                 |
| RB1.16.14.RB1.1_R | chr13:48954201-48954434        | CTCCCCGACCAAGAAACA                     |
| RB1.23.1.RB1.1_F  | chr13:49039349-49039504        | TTTTTGCTCTAGCCCCCTAC                   |
| RB1.23.1.RB1.1_R  | chr13:49039349-49039504        | TCCCTAAAGAGAAAACACACAC                 |
| RB1.23.2.RB1.2_F  | chr13:49039216-49039368        | GGTCTTCATGCAGAGACTGA                   |
| RB1.23.2.RB1.2_R  | chr13:49039216-49039368        | CTTGTAAGGGCTTCGAGGAA                   |
| RB1.13.1.RB1.1_F  | chr13:48951063-48951217        | ACCTCCTAAAGAACTGCACA                   |
| RB1.13.1.RB1.1_R  | chr13:48951063-48951217        | ACTGGAAGATGCTGCTTTT                    |
| RB1.13.4.RB1.2_F  | chr13:48951028-48951153        | TGATTACACAGTATCCTCGACA                 |
| RB1.13.4.RB1.2_R  | chr13:48951028-48951153        | GTTACCTGTGATCCAATTTGCA                 |
| RB1.25.1.RB1.1_F  | chr13:49050856-49051014        | AGACTTCTGAGAAGTTCAGAA                  |
| RB1.25.1.RB1.1_R  | chr13:49050856-49051014        | GGATTCCTCCAGATGACCATC                  |
| RB1.25.2.RB1.2_F  | chr13:49050759-49050897        | TGCCTGATTTTTGACACACC                   |
| RB1.25.2.RB1.2_R  | chr13:49050759-49050897        | GTTGCTTCCCTCAGCACTTC                   |
| RB1.27.1.RB1.1_F  | chr13:49054098-49054228        | TTGCCAACTTACCCAGTACC                   |
| RB1.27.1.RB1.1_R  | chr13:49054098-49054228        | ATCCAGAGGTGTACACAGTG                   |
| RB1.6.12.RB1.1_F  | chr13:48923063-48923208        | TCTTTCAGTGATACATTTTCTGT                |
| RB1.6.12.RB1.1_R  | chr13:48923063-48923208        | AGTCCAAAGGAATGCCAATT                   |
| RB1.3.1.RB1.1_F   | chr13:48916742-48916872        | TTTTTGTTCAGGGAGGTT                     |
| RB1.3.1.RB1.1_R   | chr13:48916742-48916872        | TCCTTTTATGGCAGAGGCTT                   |
| RB1.3.2.RB1.2_F   | chr13:48916603-48916755        | TGCCATCAGAAGGATGTGTT                   |
| RB1.3.2.RB1.2_R   | chr13:48916603-48916755        | CAGATTCCTCCACAGTTCCTT                  |
| RB1.9.12.RB1.1_F  | chr13:48938984-48939139        | TGTTCAAGAGTCAAGAGATTAGAT               |
| RB1.9.12.RB1.1_R  | chr13:48938984-48939139        | CCCTCCACAGTCTCAAAACA                   |
| RB1.12.12.RB1.1_F | chr13:48947517-48947662        | CTCCCTTCATTGCTTAACACA                  |
| RB1.12.12.RB1.1_R | chr13:48947517-48947662        | AATTTCAAGTTTCTTTGCCAAGA                |
| RB1.20.1.RB1.1_F  | chr13:49033833-49033987        | TATTCACAGTGTATCGGC                     |
| RB1.20.1.RB1.1_R  | chr13:49033833-49033987        | GTAGGGAGGAGAGAAGGTGA                   |
| RB1.20.2.RB1.2_F  | chr13:49033696-49033855        | TGGGGAAAGAAAAGAGTGG                    |
| RB1.20.2.RB1.2_R  | chr13:49033696-49033855        | GACAGAAGGCGTTCACAAAG                   |
| RB1.14.1.RB1.1_F  | chr13:48953649-48953806        | CTGGGCAAAACAGTGAGACT                   |
| RB1.14.1.RB1.1_R  | chr13:48953649-48953806        | CGCCCGCTGAAATTTTT                      |
| RB1.15.5.RB1.1_F  | chr13:48954147-48954298        | TGCTGACACAAATAAGGTTTCA                 |
| RB1.15.5.RB1.1_R  | chr13:48954147-48954298        | TGTTGTCATTTCAGAAGTTTGGT                |
| RB1.8.9.RB1.1_F   | chr13:48936977-48937128        | CAGCTGTTATACCCATTAATGGT                |
| RB1.8.9.RB1.1_R   | chr13:48936977-48937128        | GGGAGAACTTACATCTAAATCTACT              |
| RB1.8.12.RB1.2_F  | chr13:48936932-48937053        | TGATGGATGTCAATTTGTTCTTATC              |
| RB1.8.12.RB1.2_R  | chr13:48936932-48937053        | TCATGTTCTTTACAGAGAACTTCA               |

|                     |                          |                           |
|---------------------|--------------------------|---------------------------|
| RB1.4.12.RB1.1_F    | chr13:48919225-48919376  | TCTTTCCTTTGTAGTGTCCATAA   |
| RB1.4.12.RB1.1_R    | chr13:48919225-48919376  | CAGAACTCAATTGTGAACAATGACA |
| RB1.4.13.RB1.2_F    | chr13:48919122-48919272  | AGTAGTGATTTGATGTAGAGCTGA  |
| RB1.4.13.RB1.2_R    | chr13:48919122-48919272  | CTTCAACAGTCTTGACATAGCA    |
| RB1.24.9.RB1.1_F    | chr13:49047451-49047606  | TGCTCATCTCTGCAAAATTGT     |
| RB1.24.9.RB1.1_R    | chr13:49047451-49047606  | GGTGTTTGAATAACTGCATTTGG   |
| RB1.19.1.RB1.1_F    | chr13:49030369-49030524  | TCCTCGTAAGATCTCCAAGA      |
| RB1.19.1.RB1.1_R    | chr13:49030369-49030524  | TTTGAACCCAGTCAGCCTAG      |
| RB1.19.2.RB1.2_F    | chr13:49030277-49030434  | TGGGTGTACAACCTTGAAGT      |
| RB1.19.2.RB1.2_R    | chr13:49030277-49030434  | TTTCAATGGCTTCTGGGTCT      |
| RB1.10.3.RB1.1_F    | chr13:48941574-48941733  | TGAAATCTGTGCCTCTGTGT      |
| RB1.10.3.RB1.1_R    | chr13:48941574-48941733  | ACCATGTGCAATACCTGTCT      |
| RB1.10.12.RB1.2_F   | chr13:48941593-48941744  | TGTGCTGAGAGATGTAATGACA    |
| RB1.10.12.RB1.2_R   | chr13:48941593-48941744  | CAAATCAATCAAATATACCATGTGC |
| RB1.5.9.RB1.1_F     | chr13:48921916-48922057  | GCATGAGAAAACACTATGACTTCT  |
| RB1.5.9.RB1.1_R     | chr13:48921916-48922057  | ACCCTAACTATCAAGATGTTTGAG  |
| CFTR.11.1.CFTR.1_F  | chr7:117199584-117199739 | GGGTAAAATTAAGCACAGTGGGA   |
| CFTR.11.1.CFTR.1_R  | chr7:117199584-117199739 | AGTGTGAAGGGTTCATATGCA     |
| CFTR.11.2.CFTR.2_F  | chr7:117199482-117199616 | AGTGAATCCTGAGCGTGATT      |
| CFTR.11.2.CFTR.2_R  | chr7:117199482-117199616 | TCTTTAATGGTGCCAGGCAT      |
| CFTR.21.9.CFTR.1_F  | chr7:117254659-117254805 | GGTTCATTTACGTCTTTTGTGC    |
| CFTR.21.9.CFTR.1_R  | chr7:117254659-117254805 | ACTCATACTTTGTACTTGTCTGA   |
| CFTR.7.10.CFTR.1_F  | chr7:117176539-117176793 | GACTTAAAACCTTGAGCAGTTCTT  |
| CFTR.7.10.CFTR.1_R  | chr7:117176539-117176793 | TGAGGTGGAAGTCTACCATGA     |
| CFTR.26.6.CFTR.1_F  | chr7:117305495-117305636 | CTGTTCTGTGATATTATGTGTGGT  |
| CFTR.26.6.CFTR.1_R  | chr7:117305495-117305636 | CAAGGGCAATGAGATCTTAAGT    |
| CFTR.2.7.CFTR.1_F   | chr7:117144269-117144411 | TCCAAATCTGTATGGAGACCA     |
| CFTR.2.7.CFTR.1_R   | chr7:117144269-117144411 | CAATGTACATGAACATACCTTTCC  |
| CFTR.2.8.CFTR.2_F   | chr7:117144392-117144527 | TCCCTTCTGTGATTCTGTCT      |
| CFTR.2.8.CFTR.2_R   | chr7:117144392-117144527 | GCATTAGCCACCATACTTGG      |
| CFTR.17.1.CFTR.1_F  | chr7:117243693-117243847 | GTGTTTACATTTACGTGGGAG     |
| CFTR.17.1.CFTR.1_R  | chr7:117243693-117243847 | CAGCAGTTTCACTTCTTAGACC    |
| CFTR.17.2.CFTR.2_F  | chr7:117243566-117243697 | ACTTTGGCTGCCAAATAACG      |
| CFTR.17.2.CFTR.2_R  | chr7:117243566-117243697 | CCCATAGCAAGCAAAGTGTC      |
| CFTR.22.1.CFTR.1_F  | chr7:117267594-117267755 | TGCGATCTGTGAGCCGA         |
| CFTR.22.1.CFTR.1_R  | chr7:117267594-117267755 | TCCACCTTCTGTGATTTTTC      |
| CFTR.22.2.CFTR.2_F  | chr7:117267748-117267877 | GGGCCAAATGACTGTCAAAG      |
| CFTR.22.2.CFTR.2_R  | chr7:117267748-117267877 | ACACATTGCTTCAGGCTACT      |
| CFTR.22.2.CFTR.3_F  | chr7:117267468-117267612 | GCCCGACAAATAACCAAGTG      |
| CFTR.22.2.CFTR.3_R  | chr7:117267468-117267612 | AGGTTTACCTTCTGTTGGCA      |
| CFTR.1.1.CFTR.1_F   | chr7:117120105-117120257 | GGTCTTTGGCATTAGGAGCT      |
| CFTR.1.1.CFTR.1_R   | chr7:117120105-117120257 | CAAACCCAAACCCATACACAC     |
| CFTR.18.10.CFTR.1_F | chr7:117246643-117246899 | TGGGTTCTGAATGCGTCTACT     |
| CFTR.18.10.CFTR.1_R | chr7:117246643-117246899 | AGACAGGACTTCAACCTCA       |
| CFTR.23.1.CFTR.1_F  | chr7:117282505-117282648 | CTTATAGGTGGCCTCTTGG       |
| CFTR.23.1.CFTR.1_R  | chr7:117282505-117282648 | TGGCTAAGTCTTTTGCTCA       |
| CFTR.23.2.CFTR.2_F  | chr7:117282478-117282612 | TCACAGAAGTGATCCCATCA      |
| CFTR.23.2.CFTR.2_R  | chr7:117282478-117282612 | AAAGGCTTTCTCCACTGTT       |
| CFTR.16.1.CFTR.1_F  | chr7:117242879-117243021 | ACTGTGTCTTGTTCACATCCA     |
| CFTR.16.1.CFTR.1_R  | chr7:117242879-117243021 | CCACTACCATAATGCTTGGGA     |
| CFTR.13.1.CFTR.1_F  | chr7:117230382-117230538 | CCAGGAAATAGAGAGGAAATGT    |
| CFTR.13.1.CFTR.1_R  | chr7:117230382-117230538 | TGGGACAGTCTGTCTTTCTT      |
| CFTR.6.1.CFTR.1_F   | chr7:117175360-117175517 | CAAGTGGCACTCCTCATGG       |
| CFTR.6.1.CFTR.1_R   | chr7:117175360-117175517 | CCTGGTTTTACTAAAGTGGGC     |
| CFTR.6.2.CFTR.2_F   | chr7:117175288-117175434 | TGACACCTGTTTTTGTCTGTG     |
| CFTR.6.2.CFTR.2_R   | chr7:117175288-117175434 | CATCATTCTCCCTAGCCCAG      |
| CFTR.27.1.CFTR.1_F  | chr7:117306992-117307152 | GAACAAAGTCCGGCAGTAC       |
| CFTR.27.1.CFTR.1_R  | chr7:117306992-117307152 | ATGCTGCTCTCTAAAGCCTT      |
| CFTR.27.2.CFTR.2_F  | chr7:117307024-117307182 | AAACTGCTGAACGAGAGGAG      |
| CFTR.27.2.CFTR.2_R  | chr7:117307024-117307182 | TCCATGAGCAAATGTCCCAT      |
| CFTR.27.2.CFTR.3_F  | chr7:117306853-117306997 | TTCAAATGCAAGGCTCTGG       |
| CFTR.27.2.CFTR.3_R  | chr7:117306853-117306997 | TCGTTCCAGCAGTTTCTGGAT     |
| CFTR.25.1.CFTR.1_F  | chr7:117304751-117304911 | AACCTGCAGTTGGGCTC         |
| CFTR.25.1.CFTR.1_R  | chr7:117304751-117304911 | CAGAACATCTGAAACTCACACT    |
| CFTR.25.2.CFTR.2_F  | chr7:117304805-117304963 | ACTTTGTCTTGTGGATGGG       |
| CFTR.25.2.CFTR.2_R  | chr7:117304805-117304963 | TCACCATGAAGCAGGCATAA      |
| CFTR.25.2.CFTR.3_F  | chr7:117304621-117304779 | TTCAAATGGTGGCAGGTAGT      |

CFTR.25.2.CFTR.3\_R  
CFTR.3.9.CFTR.1\_F  
CFTR.3.9.CFTR.1\_R  
CFTR.9.10.CFTR.1\_F  
CFTR.9.10.CFTR.1\_R  
CFTR.12.9.CFTR.1\_F  
CFTR.12.9.CFTR.1\_R  
CFTR.20.9.CFTR.1\_F  
CFTR.20.9.CFTR.1\_R  
CFTR.20.10.CFTR.2\_F  
CFTR.20.10.CFTR.2\_R  
CFTR.14.1.CFTR.1\_F  
CFTR.14.1.CFTR.1\_R  
CFTR.14.2.CFTR.2\_F  
CFTR.14.2.CFTR.2\_R  
CFTR.14.2.CFTR.3\_F  
CFTR.14.2.CFTR.3\_R  
CFTR.14.3.CFTR.4\_F  
CFTR.14.3.CFTR.4\_R  
CFTR.14.3.CFTR.5\_F  
CFTR.14.3.CFTR.5\_R  
CFTR.14.10.CFTR.6\_F  
CFTR.14.10.CFTR.6\_R  
CFTR.15.4.CFTR.1\_F  
CFTR.15.4.CFTR.1\_R  
CFTR.15.6.CFTR.2\_F  
CFTR.15.6.CFTR.2\_R  
CFTR.8.1.CFTR.1\_F  
CFTR.8.1.CFTR.1\_R  
CFTR.8.2.CFTR.2\_F  
CFTR.8.2.CFTR.2\_R  
CFTR.8.2.CFTR.3\_F  
CFTR.8.2.CFTR.3\_R  
CFTR.4.1.CFTR.1\_F  
CFTR.4.1.CFTR.1\_R  
CFTR.4.2.CFTR.2\_F  
CFTR.4.2.CFTR.2\_R  
CFTR.24.10.CFTR.1\_F  
CFTR.24.10.CFTR.1\_R  
CFTR.19.1.CFTR.1\_F  
CFTR.19.1.CFTR.1\_R  
CFTR.19.2.CFTR.2\_F  
CFTR.19.2.CFTR.2\_R  
CFTR.10.4.CFTR.1\_F  
CFTR.10.4.CFTR.1\_R  
CFTR.10.5.CFTR.2\_F  
CFTR.10.5.CFTR.2\_R  
CFTR.5.10.CFTR.1\_F  
CFTR.5.10.CFTR.1\_R  
FGFR10P.6.7.FGFR10P.1\_F  
FGFR10P.6.7.FGFR10P.1\_R  
FGFR10P.11.1.FGFR10P.1\_F  
FGFR10P.11.1.FGFR10P.1\_R  
FGFR10P.3.5.FGFR10P.1\_F  
FGFR10P.3.5.FGFR10P.1\_R  
FGFR10P.7.1.FGFR10P.1\_F  
FGFR10P.7.1.FGFR10P.1\_R  
FGFR10P.9.1.FGFR10P.1\_F  
FGFR10P.9.1.FGFR10P.1\_R  
FGFR10P.12.8.FGFR10P.1\_F  
FGFR10P.12.8.FGFR10P.1\_R  
FGFR10P.2.5.FGFR10P.1\_F  
FGFR10P.2.5.FGFR10P.1\_R  
FGFR10P.14.1.FGFR10P.1\_F  
FGFR10P.14.1.FGFR10P.1\_R  
FGFR10P.8.1.FGFR10P.1\_F  
FGFR10P.8.1.FGFR10P.1\_R

chr7:117304621-117304779  
chr7:117149072-117149196  
chr7:117149072-117149196  
chr7:117182011-117182185  
chr7:117182011-117182185  
chr7:117227738-117227894  
chr7:117227738-117227894  
chr7:117251714-117251868  
chr7:117251714-117251868  
chr7:117251504-117251752  
chr7:117251504-117251752  
chr7:117232228-117232387  
chr7:117232228-117232387  
chr7:117232408-117232567  
chr7:117232408-117232567  
chr7:117232094-117232237  
chr7:117232094-117232237  
chr7:117232376-117232524  
chr7:117232376-117232524  
chr7:117232562-117232718  
chr7:117232562-117232718  
chr7:117231942-117232154  
chr7:117231942-117232154  
chr7:117234950-117235102  
chr7:117234950-117235102  
chr7:117235034-117235167  
chr7:117235034-117235167  
chr7:117180174-117180333  
chr7:117180174-117180333  
chr7:117180325-117180466  
chr7:117180325-117180466  
chr7:117180087-117180220  
chr7:117180087-117180220  
chr7:117171013-117171170  
chr7:117171013-117171170  
chr7:117170901-117171036  
chr7:117170901-117171036  
chr7:117292784-117293014  
chr7:117292784-117293014  
chr7:117250605-117250730  
chr7:117250605-117250730  
chr7:117250528-117250686  
chr7:117250528-117250686  
chr7:117188688-117188848  
chr7:117188688-117188848  
chr7:117188810-117188939  
chr7:117188810-117188939  
chr7:117174195-117174425  
chr7:117174195-117174425  
chr6:167424258-167424400  
chr6:167424258-167424400  
chr6:167446056-167446184  
chr6:167446056-167446184  
chr6:167416662-167416789  
chr6:167416662-167416789  
chr6:167426903-167427056  
chr6:167426903-167427056  
chr6:167438257-167438398  
chr6:167438257-167438398  
chr6:167447203-167447461  
chr6:167447203-167447461  
chr6:167413479-167413611  
chr6:167413479-167413611  
chr6:167453512-167453647  
chr6:167453512-167453647  
chr6:167435927-167436086  
chr6:167435927-167436086  
chr6:167435927-167436086

CCACAAGGACAAAGTCAAGC  
TGCAACTTATTGGTCCCCTTAC  
ATGAATGTACAAATGAGATCCTTAC  
AGCACAAATGAGAGTATAAAGTAGATGT  
AGAAAACAGTTAGGTGTTTAGAGCA  
GAAGGAAGATGTGCCTTCA  
TGCTTGCTAGACCAATAATTAGT  
TTCGGACGGCAGCCTTA  
TGCTTAGCTAAAAGTTAATGAGTTCA  
CAAAGAATGGCACCAGTGTGA  
AGGTACAAGAACCAGTTGGCA  
ACTGAGACCTTACACCGTTT  
TCAGAATCCTCTTCGATGCC  
GGCATCGAAGAGGATTCTGA  
GCTGTTGCTTTTCGGTGAAT  
TTTTCGATGAAGTAGCAGC  
AGGAGACAGGAGCATCTCC  
CCATTGTGCAAAAAGACTCCC  
GTGTCATCAGGTTCCAGGACA  
ACACACTCAGTTAACCAAGGT  
AAATACCCCAAGCGATGTA  
TGCTAAAATACGAGACATATTGCAA  
TGGTCGAAAAGATCACATCCCA  
TGGTGGCATGAACTGTACT  
ACATTCTTACCTCTGCCAGA  
CCAGCAGTACTACATGGAA  
GTGCATATATATGATACATCCCCA  
AGAACAGAAGTGAAGTACTC  
CAGGGAAATGCGCAGTG  
TCATTCTGCATTGTTCTGCG  
CGCACATTTTTCGAAAGTTC  
GACCATGCTCAGATCTTCCA  
AACACCACAAGAACCCTGA  
TCATAGCTTCCATGACCCG  
GGCCTGTGCAAGGAAGTATT  
CTTGTGTTGAAATCTCAGGGT  
GCCTATGCCTAGATAAATCGC  
ACTTGATGGTAAGTACATGGGTGT  
TGTGTTGGTATGAGTTACCCCT  
TTGTGATTGGAGCTATAGCAGT  
AGATGAGTATCGCACATTCACT  
CACACTTTGTCCACTTTGCA  
TTGAGTTGCTGTGAGGTTTG  
GTGTGTTGTTGTTGTTT  
AGTGGATCCAGCAACCG  
TCTTGGTACTCCGTCTCTGA  
ACCTTCCAGCACTACAAACT  
TGAACCTGAGAAGATAGTAAGCTAGA  
AGTGCCTAAAAGATTAATCAATAGGT  
TGGAGTGAATTTGGTATATTTGTGT  
AAGTCCAGACATGACTCCCG  
GGTAGGTAATTTGTGACGCAC  
TTGCTTGTCTGTGTTTCGGA  
AGGGTAAACACATGACACTTAA  
TCCTGATTTCTCCCAATGGT  
AGATGTTCCACTTCTGAGACA  
CTCTGCCCTCATGCATGTTA  
GAGCACCGATTAAGTGTCTC  
TCCCAGATTTGAAGTCCAC  
GCTGCTGCCCTTGTACATT  
TGGGAAATGCGAACACCAT  
TTGCTCGTGTGTTGTTGCTG  
ACAGCCATGTTAAAATCTGGA  
AACAAAGGACAGAGGACTGAC  
AAATCTTCCACATGGGCT  
ATGAGGCCAATCAGAGTGAT  
TGGCTTAGGAATGGGATCAT

FGFR1OP.8.2.FGFR1OP.2\_F  
FGFR1OP.8.2.FGFR1OP.2\_R  
FGFR1OP.8.2.FGFR1OP.3\_F  
FGFR1OP.8.2.FGFR1OP.3\_R  
FGFR1OP.4.8.FGFR1OP.1\_F  
FGFR1OP.4.8.FGFR1OP.1\_R  
FGFR1OP.1.5.FGFR1OP.1\_F  
FGFR1OP.1.5.FGFR1OP.1\_R  
FGFR1OP.10.6.FGFR1OP.1\_F  
FGFR1OP.10.6.FGFR1OP.1\_R  
FGFR1OP.13.1.FGFR1OP.1\_F  
FGFR1OP.13.1.FGFR1OP.1\_R  
FGFR1OP.5.3.FGFR1OP.1\_F  
FGFR1OP.5.3.FGFR1OP.1\_R  
FGFR1OP.5.4.FGFR1OP.2\_F  
FGFR1OP.5.4.FGFR1OP.2\_R  
BRCA1.11.18.BRCA1.1\_F  
BRCA1.11.18.BRCA1.1\_R  
BRCA1.11.20.BRCA1.2\_F  
BRCA1.11.20.BRCA1.2\_R  
BRCA1.21.22.BRCA1.1\_F  
BRCA1.21.22.BRCA1.1\_R  
BRCA1.7.1.BRCA1.1\_F  
BRCA1.7.1.BRCA1.1\_R  
BRCA1.2.1.BRCA1.1\_F  
BRCA1.2.1.BRCA1.1\_R  
BRCA1.17.1.BRCA1.1\_F  
BRCA1.17.1.BRCA1.1\_R  
BRCA1.22.1.BRCA1.1\_F  
BRCA1.22.1.BRCA1.1\_R  
BRCA1.1.1.BRCA1.1\_F  
BRCA1.1.1.BRCA1.1\_R  
BRCA1.18.21.BRCA1.1\_F  
BRCA1.18.21.BRCA1.1\_R  
BRCA1.23.23.BRCA1.1\_F  
BRCA1.23.23.BRCA1.1\_R  
BRCA1.13.1.BRCA1.1\_F  
BRCA1.13.1.BRCA1.1\_R  
BRCA1.13.2.BRCA1.2\_F  
BRCA1.13.2.BRCA1.2\_R  
BRCA1.16.1.BRCA1.1\_F  
BRCA1.16.1.BRCA1.1\_R  
BRCA1.6.1.BRCA1.1\_F  
BRCA1.6.1.BRCA1.1\_R  
BRCA1.3.1.BRCA1.1\_F  
BRCA1.3.1.BRCA1.1\_R  
BRCA1.9.1.BRCA1.1\_F  
BRCA1.9.1.BRCA1.1\_R  
BRCA1.9.16.BRCA1.2\_F  
BRCA1.9.16.BRCA1.2\_R  
BRCA1.9.17.BRCA1.3\_F  
BRCA1.9.17.BRCA1.3\_R  
BRCA1.9.21.BRCA1.4\_F  
BRCA1.9.21.BRCA1.4\_R  
BRCA1.12.1.BRCA1.1\_F  
BRCA1.12.1.BRCA1.1\_R  
BRCA1.15.1.BRCA1.1\_F  
BRCA1.15.1.BRCA1.1\_R  
BRCA1.15.2.BRCA1.2\_F  
BRCA1.15.2.BRCA1.2\_R  
BRCA1.15.2.BRCA1.3\_F  
BRCA1.15.2.BRCA1.3\_R  
BRCA1.15.3.BRCA1.4\_F  
BRCA1.15.3.BRCA1.4\_R  
BRCA1.15.3.BRCA1.5\_F  
BRCA1.15.3.BRCA1.5\_R  
BRCA1.15.4.BRCA1.6\_F

chr6:167435984-167436138  
chr6:167435984-167436138  
chr6:167435811-167435963  
chr6:167435811-167435963  
chr6:167417206-167417458  
chr6:167417206-167417458  
chr6:167412901-167413040  
chr6:167412901-167413040  
chr6:167439963-167440114  
chr6:167439963-167440114  
chr6:167453362-167453491  
chr6:167453362-167453491  
chr6:167417715-167417874  
chr6:167417715-167417874  
chr6:167417788-167417942  
chr6:167417788-167417942  
chr17:41228514-41228663  
chr17:41228514-41228663  
chr17:41228407-41228543  
chr17:41228407-41228543  
chr17:41258445-41258595  
chr17:41258445-41258595  
chr17:41215879-41216031  
chr17:41215879-41216031  
chr17:41199580-41199723  
chr17:41199580-41199723  
chr17:41249252-41249408  
chr17:41249252-41249408  
chr17:41267736-41267886  
chr17:41267736-41267886  
chr17:41197684-41197820  
chr17:41197684-41197820  
chr17:41251751-41251901  
chr17:41251751-41251901  
chr17:41276029-41276253  
chr17:41276029-41276253  
chr17:41234447-41234599  
chr17:41234447-41234599  
chr17:41234327-41234486  
chr17:41234327-41234486  
chr17:41247852-41247986  
chr17:41247852-41247986  
chr17:41215277-41215418  
chr17:41215277-41215418  
chr17:41201098-41201248  
chr17:41201098-41201248  
chr17:41222965-41223125  
chr17:41222965-41223125  
chr17:41223089-41223248  
chr17:41223089-41223248  
chr17:41223244-41223377  
chr17:41223244-41223377  
chr17:41222917-41223068  
chr17:41222917-41223068  
chr17:41231293-41231434  
chr17:41231293-41231434  
chr17:41243387-41243547  
chr17:41243387-41243547  
chr17:41243282-41243415  
chr17:41243282-41243415  
chr17:41243558-41243717  
chr17:41243558-41243717  
chr17:41243438-41243596  
chr17:41243438-41243596  
chr17:41243808-41243967  
chr17:41243808-41243967  
chr17:41243808-41243967  
chr17:41243657-41243808

GCCTTCACTTACTGTCCCAT  
CCCTAGTCTCATAGCTCAA  
GCACACACACAGGTTTGATT  
ATGGGACAGTAAAGTGAAGGC  
TGCTTACTTACCTTTTTCTTGATCTT  
ACACTGGTGCCAGCTATCTG  
GGTTGTCTTGGAGAAGCAAG  
TGCCACGCAAGCCCT  
AGCCCCATATTGAACAACGA  
ACGATCAGCACAAAACTAGA  
AGACTACTCACATTCTGACACT  
GTCAGTCTCTGTCTTGT  
CTCCTTGAGAATAACTTCTGCT  
TACTTCCCCAGTGGTTGG  
GTCGAGAGAATTTAGCCCGA  
TGCCTAATCTGCATGGCTA  
TGATGTTTCTTACCTTTCCACT  
ATCACTATCAGAACAAAGCAGT  
AGTGATATAATGCCTGTATGCA  
AAGTTTGAGGTGTCTGCAGA  
TTCTTACTGTGGTTGCTTCC  
TGCTTTTGAGTATTCTTTCTACA  
AGGGAGGAGGGGAGAAATAG  
ACTGAGGCTCTTTAGCTTCT  
ATGTGCCAAGAAGTGTGCTA  
CTCTTCTCTTCCCTGGGATC  
GCTTCATAGACAAGGTTCTCT  
GCCACAGTAGATGCTCAGTA  
TGGAGCCACATAACACATTCA  
TGACTCAGTCATAACAGCTCA  
CTGTGGCTCTGTACCTGTG  
GCTTGTGTTCTCTGTCTCCA  
GGCAAACTATAAGATAAGGAATCC  
CTTGACTGTCTTTACCATACTGT  
CCCAAATTAATACACTCTTGCTGA  
GGACGTTGTATTAGTTCTTTGGT  
CTGATGTGCTTTGTTCTGGA  
TCTTGGTGCCATTTATCGTT  
TGTGCTGAGCAAGGATCATA  
GCCTTCTAACAGCTACCCTT  
TGCTTGTAAAGTTGGCAAC  
GGTCATTTGACAGTTCTGCA  
GGAAAGTGGTGCATTGATGG  
GCACGTTCTTCTGCTGTATG  
GTCTTGCTCACAGGAGAGAA  
GCCTGGGTTAAGTATGCAGA  
TTCTTCTGGGGTCAGGC  
CTTCAACCTCTGCATTGAAAGT  
TCAGTAGTATGAGCAGCAGC  
CCATTCTTTTCCAGGGGAAC  
GCTGATFCCAGATFCCAGGT  
TGGATTTCCACCAACTGT  
CCAGAATGTTGTTAAGTCTTAGTCA  
GCTGCTGCTCATACTACTGA  
ATTCTCTCTTTTGGCCAGAA  
CCGTTCCCTTGATGTCTACA  
TGTAATAATGTGCTCCCCAAA  
TCTGAAAGCCAGGGAGTTG  
AAGATGACGTCCTAGCTGTG  
TTTGTGTTTGGCCAGTCTA  
ACTCAGACCAACTCCCTG  
GCAGTAACCAGGTAATATTGGC  
GACTGGGGCAACACAAAAA  
ACACCCAGGATCCTTTCTTG  
TAGACAGACACTCGGTAGCA  
CAGGAGTCCCTAGCCCTTCA  
TCCAATTCCTGCACTGTGA

|                        |                         |                          |
|------------------------|-------------------------|--------------------------|
| BRCA1.15.4.BRCA1.6_R   | chr17:41243657-41243808 | GTCTACTAGGCATAGCACCG     |
| BRCA1.15.4.BRCA1.7_F   | chr17:41244108-41244267 | ACAGGTCATCAGGTGTCTCA     |
| BRCA1.15.4.BRCA1.7_R   | chr17:41244108-41244267 | GGTTTTGCAACCTGAGGTCT     |
| BRCA1.15.5.BRCA1.8_F   | chr17:41243946-41244107 | TGGCCCTCTTCGGTAA         |
| BRCA1.15.5.BRCA1.8_R   | chr17:41243946-41244107 | TCATGCATCTCAGGTTTGTTC    |
| BRCA1.15.5.BRCA1.9_F   | chr17:41244708-41244867 | GACAAAACCTAGAGCCTCCT     |
| BRCA1.15.5.BRCA1.9_R   | chr17:41244708-41244867 | CCACTCTGGTCTTAAAGA       |
| BRCA1.15.6.BRCA1.10_F  | chr17:41244957-41245117 | GCAAATGACTGGCGCTTT       |
| BRCA1.15.6.BRCA1.10_R  | chr17:41244957-41245117 | CAGTGTGCAGCATTGAAAAC     |
| BRCA1.15.6.BRCA1.11_F  | chr17:41244608-41244740 | TTGATGGGAAAAAGTGGTGG     |
| BRCA1.15.6.BRCA1.11_R  | chr17:41244608-41244740 | CCTGTGGTTGGTCAGAAAAGA    |
| BRCA1.15.7.BRCA1.12_F  | chr17:41245148-41245307 | TGCACACTGACTCACACA       |
| BRCA1.15.7.BRCA1.12_R  | chr17:41245148-41245307 | TGCTAATAATGCTGAAGACCC    |
| BRCA1.15.7.BRCA1.13_F  | chr17:41244487-41244644 | GGCTAATTGTGCTCACTGTAC    |
| BRCA1.15.7.BRCA1.13_R  | chr17:41244487-41244644 | CGAAACTGGACTCATTACTCC    |
| BRCA1.15.8.BRCA1.14_F  | chr17:41245033-41245166 | TATGCTTGTTCCTCCGACTGT    |
| BRCA1.15.8.BRCA1.14_R  | chr17:41245033-41245166 | GTTAGCACTCTAGGGAAGGC     |
| BRCA1.15.8.BRCA1.15_F  | chr17:41244348-41244502 | CTACCTAGTTCTGCTTGAATG    |
| BRCA1.15.8.BRCA1.15_R  | chr17:41244348-41244502 | TCACCTGAAAGAGAAAATGGGA   |
| BRCA1.15.8.BRCA1.16_F  | chr17:41245387-41245547 | TGGAAGGCTAGGATTGACAA     |
| BRCA1.15.8.BRCA1.16_R  | chr17:41245387-41245547 | GGCACAGCAGAAACCTACA      |
| BRCA1.15.9.BRCA1.17_F  | chr17:41245292-41245442 | TGCAAAACCCCTTCTCCACT     |
| BRCA1.15.9.BRCA1.17_R  | chr17:41245292-41245442 | ACTTCCCAGAGCTGAAGTT      |
| BRCA1.15.9.BRCA1.18_F  | chr17:41245568-41245729 | TAGGTTTCTGCTGTGCCT       |
| BRCA1.15.9.BRCA1.18_R  | chr17:41245568-41245729 | TCCACAATTCAAAGCACCT      |
| BRCA1.15.10.BRCA1.19_F | chr17:41245538-41245692 | CCAGTTGCAGGTTCTTTACC     |
| BRCA1.15.10.BRCA1.19_R | chr17:41245538-41245692 | GAGGAAGTCTTCTACCAGGC     |
| BRCA1.15.10.BRCA1.20_F | chr17:41245750-41245909 | AGGTGCTTTTGAATTGTGGA     |
| BRCA1.15.10.BRCA1.20_R | chr17:41245750-41245909 | AGCAGAAATGGTCAAGTGATG    |
| BRCA1.15.11.BRCA1.21_F | chr17:41245655-41245789 | TCAGTACAATTAGGTGGGCT     |
| BRCA1.15.11.BRCA1.21_R | chr17:41245655-41245789 | TCAAAACGAAAGCTGAACCT     |
| BRCA1.15.11.BRCA1.22_F | chr17:41245980-41246139 | CAGGAGTCTTTTGAAGTCC      |
| BRCA1.15.11.BRCA1.22_R | chr17:41245980-41246139 | AACCTATCGGAAGAAGGCAA     |
| BRCA1.15.12.BRCA1.23_F | chr17:41246139-41246300 | TGGCTTAAGTTGGGGAGG       |
| BRCA1.15.12.BRCA1.23_R | chr17:41246139-41246300 | GCTGATGATTGGACGTTCT      |
| BRCA1.15.12.BRCA1.24_F | chr17:41245847-41245997 | CGAGTGATTCTATGGGTTAGG    |
| BRCA1.15.12.BRCA1.24_R | chr17:41245847-41245997 | GGCCTTCATCCTGAGGATTT     |
| BRCA1.15.13.BRCA1.25_F | chr17:41246341-41246501 | GCTACTTTGGCATTGATTTCAG   |
| BRCA1.15.13.BRCA1.25_R | chr17:41246341-41246501 | GCTGATCCCTGTGTGA         |
| BRCA1.15.14.BRCA1.26_F | chr17:41246208-41246343 | ACTCTCTACTGATTGGAGTGA    |
| BRCA1.15.14.BRCA1.26_R | chr17:41246208-41246343 | TGATGACTCACATGATGGGG     |
| BRCA1.15.14.BRCA1.27_F | chr17:41246522-41246681 | CACACAGGGGATCAGCATT      |
| BRCA1.15.14.BRCA1.27_R | chr17:41246522-41246681 | TTACAGCATGAGAACAGCAG     |
| BRCA1.15.15.BRCA1.28_F | chr17:41246479-41246611 | ATTCTCTGAGCATGGCAGTT     |
| BRCA1.15.15.BRCA1.28_R | chr17:41246479-41246611 | ATAAAAAGCAAACAGCCTGGC    |
| BRCA1.15.16.BRCA1.29_F | chr17:41246632-41246791 | GCCAGGCTGTTGCTTTTAT      |
| BRCA1.15.16.BRCA1.29_R | chr17:41246632-41246791 | GAACACCCTGAGAAGCGT       |
| BRCA1.15.17.BRCA1.30_F | chr17:41246789-41246949 | TTTCTGGATGCCTCTCAGC      |
| BRCA1.15.17.BRCA1.30_R | chr17:41246789-41246949 | TGGTTGATTTCCACCTCCAA     |
| BRCA1.15.18.BRCA1.31_F | chr17:41244256-41244382 | TGCTTACAATTACTTCCAGGAA   |
| BRCA1.15.18.BRCA1.31_R | chr17:41244256-41244382 | TCCAGTACTAATGAAGTGGGC    |
| BRCA1.15.21.BRCA1.32_F | chr17:41244862-41245012 | CACATTCAAAAGTGACTTTTGGAC |
| BRCA1.15.21.BRCA1.32_R | chr17:41244862-41245012 | ACAGTCGGGAAACAAGCATA     |
| BRCA1.14.1.BRCA1.1_F   | chr17:41242926-41243082 | CTGAATGCAAAGGACACCAC     |
| BRCA1.14.1.BRCA1.1_R   | chr17:41242926-41243082 | TGCAGCGTTTATAGTCTGCT     |
| BRCA1.20.1.BRCA1.1_F   | chr17:41256858-41256991 | TTCATGGACAGCACTTGAGT     |
| BRCA1.20.1.BRCA1.1_R   | chr17:41256858-41256991 | CACTTGCTGAGTGTGTTTCT     |
| BRCA1.8.1.BRCA1.1_F    | chr17:41219588-41219743 | GCCTCATGTGGTTTTATGCA     |
| BRCA1.8.1.BRCA1.1_R    | chr17:41219588-41219743 | GCTGTGTCTAGAGGTAAC       |
| BRCA1.4.1.BRCA1.1_F    | chr17:41202997-41203143 | TTCAGCAATCTGAGGAACCC     |
| BRCA1.4.1.BRCA1.1_R    | chr17:41202997-41203143 | TGTCCTCTCTCTCCCTCTC      |
| BRCA1.24.1.BRCA1.1_F   | chr17:41277065-41277207 | TCCAGTTCCTATCACGAGGA     |
| BRCA1.24.1.BRCA1.1_R   | chr17:41277065-41277207 | GAGAGTGGATTTCCGAAGCT     |
| BRCA1.19.18.BRCA1.1_F  | chr17:41256158-41256291 | CCAAGGAAGGATTTTCGGGT     |
| BRCA1.19.18.BRCA1.1_R  | chr17:41256158-41256291 | ACTGCAAACATAATGTTTCC     |
| BRCA1.19.19.BRCA1.2_F  | chr17:41256028-41256167 | CAGCTACTAAGGGGGCTAAG     |
| BRCA1.19.19.BRCA1.2_R  | chr17:41256028-41256167 | AAACCGTGCCAAAAGACTTC     |

BRCA1.10.1.BRCA1.1\_F  
BRCA1.10.1.BRCA1.1\_R  
BRCA1.10.2.BRCA1.2\_F  
BRCA1.10.2.BRCA1.2\_R  
BRCA1.5.1.BRCA1.1\_F  
BRCA1.5.1.BRCA1.1\_R  
ERBB4.11.11.ERBB4.1\_F  
ERBB4.11.11.ERBB4.1\_R  
ERBB4.21.1.ERBB4.1\_F  
ERBB4.21.1.ERBB4.1\_R  
ERBB4.21.2.ERBB4.2\_F  
ERBB4.21.2.ERBB4.2\_R  
ERBB4.7.8.ERBB4.1\_F  
ERBB4.7.8.ERBB4.1\_R  
ERBB4.26.4.ERBB4.1\_F  
ERBB4.26.4.ERBB4.1\_R  
ERBB4.26.5.ERBB4.2\_F  
ERBB4.26.5.ERBB4.2\_R  
ERBB4.17.1.ERBB4.1\_F  
ERBB4.17.1.ERBB4.1\_R  
ERBB4.2.1.ERBB4.1\_F  
ERBB4.2.1.ERBB4.1\_R  
ERBB4.2.2.ERBB4.2\_F  
ERBB4.2.2.ERBB4.2\_R  
ERBB4.2.2.ERBB4.3\_F  
ERBB4.2.2.ERBB4.3\_R  
ERBB4.22.1.ERBB4.1\_F  
ERBB4.22.1.ERBB4.1\_R  
ERBB4.1.1.ERBB4.1\_F  
ERBB4.1.1.ERBB4.1\_R  
ERBB4.1.2.ERBB4.2\_F  
ERBB4.1.2.ERBB4.2\_R  
ERBB4.1.2.ERBB4.3\_F  
ERBB4.1.2.ERBB4.3\_R  
ERBB4.1.3.ERBB4.4\_F  
ERBB4.1.3.ERBB4.4\_R  
ERBB4.1.3.ERBB4.5\_F  
ERBB4.1.3.ERBB4.5\_R  
ERBB4.18.1.ERBB4.1\_F  
ERBB4.18.1.ERBB4.1\_R  
ERBB4.18.2.ERBB4.2\_F  
ERBB4.18.2.ERBB4.2\_R  
ERBB4.13.6.ERBB4.1\_F  
ERBB4.13.6.ERBB4.1\_R  
ERBB4.23.6.ERBB4.1\_F  
ERBB4.23.6.ERBB4.1\_R  
ERBB4.23.7.ERBB4.2\_F  
ERBB4.23.7.ERBB4.2\_R  
ERBB4.16.1.ERBB4.1\_F  
ERBB4.16.1.ERBB4.1\_R  
ERBB4.29.6.ERBB4.1\_F  
ERBB4.29.6.ERBB4.1\_R  
ERBB4.25.1.ERBB4.1\_F  
ERBB4.25.1.ERBB4.1\_R  
ERBB4.27.1.ERBB4.1\_F  
ERBB4.27.1.ERBB4.1\_R  
ERBB4.27.6.ERBB4.2\_F  
ERBB4.27.6.ERBB4.2\_R  
ERBB4.6.1.ERBB4.1\_F  
ERBB4.6.1.ERBB4.1\_R  
ERBB4.6.2.ERBB4.2\_F  
ERBB4.6.2.ERBB4.2\_R  
ERBB4.28.1.ERBB4.1\_F  
ERBB4.28.1.ERBB4.1\_R  
ERBB4.3.6.ERBB4.1\_F  
ERBB4.3.6.ERBB4.1\_R  
ERBB4.9.4.ERBB4.1\_F

chr17:41226393-41226551  
chr17:41226393-41226551  
chr17:41226337-41226479  
chr17:41209069-41209212  
chr17:41209069-41209212  
chr2:212488516-212488770  
chr2:212488516-212488770  
chr2:212576791-212576918  
chr2:212576791-212576918  
chr2:212576694-212576850  
chr2:212576694-212576850  
chr2:212293122-212293275  
chr2:212293122-212293275  
chr2:212652718-212652865  
chr2:212652718-212652865  
chr2:212652837-212652986  
chr2:212652837-212652986  
chr2:212543775-212543925  
chr2:212543775-212543925  
chr2:212251597-212251757  
chr2:212251597-212251757  
chr2:212251752-212251897  
chr2:212251752-212251897  
chr2:212251469-212251607  
chr2:212251469-212251607  
chr2:212578260-212578415  
chr2:212578260-212578415  
chr2:212248370-212248529  
chr2:212248370-212248529  
chr2:212248370-212248529  
chr2:212248324-212248479  
chr2:212248324-212248479  
chr2:212248580-212248740  
chr2:212248580-212248740  
chr2:212248661-212248804  
chr2:212248661-212248804  
chr2:212248500-212248636  
chr2:212248500-212248636  
chr2:212566737-212566892  
chr2:212566737-212566892  
chr2:212566593-212566743  
chr2:212566593-212566743  
chr2:212522455-212522584  
chr2:212522455-212522584  
chr2:212587147-212587306  
chr2:212587147-212587306  
chr2:212587007-212587157  
chr2:212587007-212587157  
chr2:212537875-212538009  
chr2:212537875-212538009  
chr2:213403104-213403256  
chr2:213403104-213403256  
chr2:212615308-212615446  
chr2:212615308-212615446  
chr2:212812194-212812343  
chr2:212812194-212812343  
chr2:212812068-212812223  
chr2:212812068-212812223  
chr2:212288920-212289069  
chr2:212288920-212289069  
chr2:212288763-212288922  
chr2:212288763-212288922  
chr2:212989472-212989629  
chr2:212989472-212989629  
chr2:212252632-212252791  
chr2:212252632-212252791  
chr2:212426580-212426738

TGTTCCGTCAAAATCGTGTG  
GCGATGGTTTTCTCCTTCCA  
GTGTTTGTTCCAATACAGCAGA  
GTACATGCACAGTTGCTCTG  
CTTGAGGGAGGGAGCTTTAC  
ATATGACGTGTCTGCTCCAC  
TCATTTGTGCAGCAACTTCTCA  
CCTTCTCTTTCCGCTTTGCA  
CTGACCCATGAATACCAGTGA  
AGTTTCTCAATCCCCTAACTCT  
AACTCTCAGCTCCAGAGG  
GTCAGCTCAGACTGTGGATT  
ACAAGCTTTAATTCGCAAAGAA  
CCAGCCCAAAGACTCACATT  
CGCCACATAGGGTAGAACAT  
CAGAAATCCTAATGGTGGAGT  
CCAATGAATGGTGTCTGCAT  
TGGCTATTAGCAACATGACTCT  
GC AACCC TAGAAGAAGCCTT  
CCTCTGTTTTATTCCCTTGA  
CCTTGTTGGGTTGTCTCG  
AGGGTGCTACTGTCTGAGA  
GCCATTACAGCAGGAGTCAT  
CTAACACGCCTTCTCTCCA  
TAGCCTAGGCCTTACTGGA  
GCTGGATGAGGAAGTTACA  
AATAAATCTGAGTACCCTCAC  
TGAGCTTGTGTGCTGAATGT  
GTATCCGGTGTCTGTAAGG  
CCTGACTACTGGAACACAG  
AGGTGTGCTCTCCACCTAA  
AGACTACCTGCAGGAGTACA  
CTTCTTGGCCTTCTCTGG  
CCCTTTGTCTCGGAGAA  
AGGTACAGTGGCTCATTAC  
CCAGAACTAGAGGTTAGCTGA  
TGACTCCTGCAGGTAGTCT  
ATGAGCCACTGTACCTCAAC  
CCCGATTACTATTCTCTGGT  
TTCTCACTTCCCCCTCCTTA  
AAGGGTTGGGATAACAGAGC  
ACTGGACAACACTCTTCAGC  
AGGAAAGGATTTGAGCGACA  
CATGTCACTGTGGATGGAGA  
TCTTGACACAGAATGCTCCA  
GGCAGCGTTTCATTAACAAG  
GGGGCAATAGTATCTATACCC  
TGGAGCACAAATTC AATGCA  
TAAGCCAACACACCACAGAT  
TGACGCTGTGTTGCTTACAC  
GATGGGTGAAGAGGGCA  
CGGGATCTGAGACTTCCAAA  
AGAGGCATGAAATGGACCAA  
AACGTGCATGTCTTTTTC  
CCAAGTTCTTGAAGTCCAAAGT  
GGCAACTGTTGTGTCTTTTC  
TGCCTTAGAGTGTCTCTCAA  
TGAGGATCGATATGCCTTGG  
ACGTCAATAGTGCAGATGGG  
AGTGCTGGTTGTTC AACAT  
GGCGTTCATATGTCTCTTCA  
AGGAGAACGTTGCTCTCAG  
AAGAGAAAGAAAGCCACAGC  
CGTGTATCTTCTGTCTTTGCA  
ACATGGTAAGCAAAGACCGA  
ACCCATGTGGCTTTCTTTT  
TGAAAACCTGTTCCAGGTTAGGA

|                       |                          |                          |
|-----------------------|--------------------------|--------------------------|
| ERBB4.9.4.ERBB4.1_R   | chr2:212426580-212426738 | GTGTCTGAGCCCAACCATC      |
| ERBB4.9.5.ERBB4.2_F   | chr2:212426730-212426874 | CCATGGGGCATAAGTTGAGT     |
| ERBB4.9.5.ERBB4.2_R   | chr2:212426730-212426874 | TCAGCACCATTAGTACAATCCA   |
| ERBB4.12.1.ERBB4.1_F  | chr2:212495200-212495356 | ACCTCACCTCTGTTTCCAAG     |
| ERBB4.12.1.ERBB4.1_R  | chr2:212495200-212495356 | TCCTCTGTCTTCTCTCTTCA     |
| ERBB4.12.2.ERBB4.2_F  | chr2:212495171-212495305 | CCCCAAACACATGAAGAGGA     |
| ERBB4.12.2.ERBB4.2_R  | chr2:212495171-212495305 | TGTCAGAACTCCCGTGATTG     |
| ERBB4.20.9.ERBB4.1_F  | chr2:212569963-212570118 | CTGGGATTACTGGTGTGAGC     |
| ERBB4.20.9.ERBB4.1_R  | chr2:212569963-212570118 | GGCTACATCTCTTCTTGATTTCT  |
| ERBB4.14.1.ERBB4.1_F  | chr2:212522675-212522833 | GAAGCAAGCACACCAAGTAC     |
| ERBB4.14.1.ERBB4.1_R  | chr2:212522675-212522833 | CCTGGCTTGAATTCATTGTG     |
| ERBB4.15.1.ERBB4.1_F  | chr2:212530078-212530239 | TTTGATGGCATGGGTGG        |
| ERBB4.15.1.ERBB4.1_R  | chr2:212530078-212530239 | TCCAGAGGAAATGACACCAC     |
| ERBB4.15.2.ERBB4.2_F  | chr2:212530026-212530183 | TAACACATACCAGGTGAGCC     |
| ERBB4.15.2.ERBB4.2_R  | chr2:212530026-212530183 | GGGTCCTGACAACGTGTACAA    |
| ERBB4.8.1.ERBB4.1_F   | chr2:212295694-212295848 | TCCTCCATCAGCATTGTAATC    |
| ERBB4.8.1.ERBB4.1_R   | chr2:212295694-212295848 | CCTGGGCATTAACGAATATCA    |
| ERBB4.8.2.ERBB4.2_F   | chr2:212295549-212295703 | CAGGAGAAGAGGCAAATGGT     |
| ERBB4.8.2.ERBB4.2_R   | chr2:212295549-212295703 | CTAGCCAGACTCTTGGGAGG     |
| ERBB4.4.1.ERBB4.1_F   | chr2:212285186-212285342 | ACCCTATTTCGAGTCAATTCTTG  |
| ERBB4.4.1.ERBB4.1_R   | chr2:212285186-212285342 | GTGTCTGATGGCAATCTTTC     |
| ERBB4.4.2.ERBB4.2_F   | chr2:212285039-212285195 | CACATCTTTTGTGGGTATGGT    |
| ERBB4.4.2.ERBB4.2_R   | chr2:212285039-212285195 | ACATCCCACCTCCCATCTAT     |
| ERBB4.24.1.ERBB4.1_F  | chr2:212589770-212589921 | TAGGGAAGGAAAAGGAGAGCA    |
| ERBB4.24.1.ERBB4.1_R  | chr2:212589770-212589921 | GGTCCTATCTCTGTCTTCTGC    |
| ERBB4.19.10.ERBB4.1_F | chr2:212568820-212568972 | GCCTGCAGCTTTAAACATA      |
| ERBB4.19.10.ERBB4.1_R | chr2:212568820-212568972 | CACCATATTTCAAGAAAATCAGCA |
| ERBB4.10.10.ERBB4.1_F | chr2:212483891-212484028 | AAAATGTGATTGCCCTGGGTG    |
| ERBB4.10.10.ERBB4.1_R | chr2:212483891-212484028 | AGAACTAATAGGTTGAGATGTCA  |
| ERBB4.5.10.ERBB4.1_F  | chr2:212286707-212286861 | TTTGCCATTGGCCTAGTCTT     |
| ERBB4.5.10.ERBB4.1_R  | chr2:212286707-212286861 | TTCAACTCCTTCTAGTTACGAA   |
| RARA.6.1.RARA.1_F     | chr17:38508633-38508792  | GACATTGACCTCTGGGACAA     |
| RARA.6.1.RARA.1_R     | chr17:38508633-38508792  | ATCTACCCAGGACACAGGG      |
| RARA.6.2.RARA.2_F     | chr17:38508504-38508643  | GAAGTGAAGGCTGGGTAGAG     |
| RARA.6.2.RARA.2_R     | chr17:38508504-38508643  | AATGATGCACTTGGTGGAGA     |
| RARA.3.1.RARA.1_F     | chr17:38504567-38504721  | CCTCCCTCTTCTCTCTCTA      |
| RARA.3.1.RARA.1_R     | chr17:38504567-38504721  | CTTCCAATGACCCCTTCAA      |
| RARA.7.1.RARA.1_F     | chr17:38510571-38510735  | ATCCTGCGGATCTGCAC        |
| RARA.7.1.RARA.1_R     | chr17:38510571-38510735  | AGATGAGGCAGATGGCG        |
| RARA.7.2.RARA.2_F     | chr17:38510724-38510870  | GAGATGGATGATGCGGAGAC     |
| RARA.7.2.RARA.2_R     | chr17:38510724-38510870  | CTGTGTAGTTGCAGACCAGA     |
| RARA.7.2.RARA.3_F     | chr17:38510447-38510586  | TATCAGACAGCATTGCTCCG     |
| RARA.7.2.RARA.3_R     | chr17:38510447-38510586  | GAGAAGGTCATGGTGTCTCTG    |
| RARA.9.1.RARA.1_F     | chr17:38512319-38512484  | TCCATGCCGCTCTCAT         |
| RARA.9.1.RARA.1_R     | chr17:38512319-38512484  | CTGTGTCCATGTGGCGT        |
| RARA.9.2.RARA.2_F     | chr17:38512190-38512325  | ATTGATCTTCCCACCTCGAG     |
| RARA.9.2.RARA.2_R     | chr17:38512190-38512325  | CCCTCTGAGTTCTCCAACAT     |
| RARA.2.1.RARA.1_F     | chr17:38498964-38499124  | TTCGAGGGGAAAGATGTACG     |
| RARA.2.1.RARA.1_R     | chr17:38498964-38499124  | AGACTGAGAGGCCGGTA        |
| RARA.2.2.RARA.2_F     | chr17:38498957-38499106  | CTTGCCCTCGAGGGGAAAG      |
| RARA.2.2.RARA.2_R     | chr17:38498957-38499106  | TACGTACAGTGGTTTGAGCC     |
| RARA.8.1.RARA.1_F     | chr17:38511515-38511676  | GGTGGTTCTGCTTCCTCAG      |
| RARA.8.1.RARA.1_R     | chr17:38511515-38511676  | TCCAGGTCTGTGAGCCT        |
| RARA.1.3.RARA.1_F     | chr17:38487468-38487628  | TTCTGACTGTGGCCGCTT       |
| RARA.1.3.RARA.1_R     | chr17:38487468-38487628  | CTGGGGATGGTGTGCTA        |
| RARA.1.4.RARA.2_F     | chr17:38487624-38487757  | GCACCAGCTTCCAGTTAGT      |
| RARA.1.4.RARA.2_R     | chr17:38487624-38487757  | AACTGGAGAAGCCTTGTCG      |
| RARA.4.1.RARA.1_F     | chr17:38506046-38506208  | ATACCCAGGGCTTCTTCC       |
| RARA.4.1.RARA.1_R     | chr17:38506046-38506208  | TCTGAGACCCCACTGAGG       |
| RARA.4.2.RARA.2_F     | chr17:38505894-38506048  | GTGAATCATCTCCCCAGCT      |
| RARA.4.2.RARA.2_R     | chr17:38505894-38506048  | CATGTTCTTCTGGATGCTGC     |
| RARA.10.1.RARA.1_F    | chr17:38566870-38567012  | ATGGTGAGAAGCTACTGCAG     |
| RARA.10.1.RARA.1_R    | chr17:38566870-38567012  | GATTTGCCCATACAAGCAGC     |
| RARA.5.1.RARA.1_F     | chr17:38508182-38508341  | CTGTGAGAAACGACCCGAAAC    |
| RARA.5.1.RARA.1_R     | chr17:38508182-38508341  | GCAAATCCCACCCTGCA        |
| RARA.5.2.RARA.2_F     | chr17:38508144-38508300  | TGCAGCTGCCCTCTTAAC       |
| RARA.5.2.RARA.2_R     | chr17:38508144-38508300  | TAGTGTATTTGCCACGTGG      |



|                        |                          |                         |
|------------------------|--------------------------|-------------------------|
| CTNNA1.11.1.CTNNA1.1_F | chr5:138260248-138260404 | TGTGTCATTGCTCTCCAAGA    |
| CTNNA1.11.1.CTNNA1.1_R | chr5:138260248-138260404 | CACTGGAAAGGGGAGAGTCC    |
| CTNNA1.11.2.CTNNA1.2_F | chr5:138260181-138260310 | AGCCTCCTTCCTCATTCAAC    |
| CTNNA1.11.2.CTNNA1.2_R | chr5:138260181-138260310 | TCCTGTGAGGTGACTACGTGA   |
| CTNNA1.7.3.CTNNA1.1_F  | chr5:138221837-138221986 | TTGACATGAGCACAATGGC     |
| CTNNA1.7.3.CTNNA1.1_R  | chr5:138221837-138221986 | ACAATCAGCACTTTCATCCAG   |
| CTNNA1.17.1.CTNNA1.1_F | chr5:138268565-138268698 | ACCAAGGTCTGTCCATCATC    |
| CTNNA1.17.1.CTNNA1.1_R | chr5:138268565-138268698 | CCCAAGTAGCTGGGACTTAC    |
| CTNNA1.2.1.CTNNA1.1_F  | chr5:138118919-138119073 | GGCCCTCTAATAAGAAAGAGAGG |
| CTNNA1.2.1.CTNNA1.1_R  | chr5:138118919-138119073 | GCCTCTCTTTACCTAAAAAGCA  |
| CTNNA1.2.2.CTNNA1.2_F  | chr5:138118772-138118918 | TGTTTCAGTGAATCTCATGTGA  |
| CTNNA1.2.2.CTNNA1.2_R  | chr5:138118772-138118918 | CATGGGCCCTTCTTAGAACGA   |
| CTNNA1.1.1.CTNNA1.1_F  | chr5:138117595-138117750 | TGATGTTTGCCTGACTGACT    |
| CTNNA1.1.1.CTNNA1.1_R  | chr5:138117595-138117750 | GGCCTGTGCTATAGAACCAT    |
| CTNNA1.18.1.CTNNA1.1_F | chr5:138269521-138269681 | ATGTCCCTGATCCAGGCA      |
| CTNNA1.18.1.CTNNA1.1_R | chr5:138269521-138269681 | TCTTGGTCTGTGTCTCATCC    |
| CTNNA1.18.2.CTNNA1.2_F | chr5:138269660-138269808 | GAAGGCCACAGAGAAAAAGC    |
| CTNNA1.18.2.CTNNA1.2_R | chr5:138269660-138269808 | GACTGATATTCAGGAGCCCC    |
| CTNNA1.18.2.CTNNA1.3_F | chr5:138269405-138269564 | CTGGTCTTGCAAGAGGAGTAG   |
| CTNNA1.18.2.CTNNA1.3_R | chr5:138269405-138269564 | ATTTGGTAGAGGCGACGTAG    |
| CTNNA1.16.1.CTNNA1.1_F | chr5:138268263-138268414 | GTGTTAAGCCTGTCTCTCTCT   |
| CTNNA1.16.1.CTNNA1.1_R | chr5:138268263-138268414 | CACTGGCCCCCTTTTGTTC     |
| CTNNA1.13.1.CTNNA1.1_F | chr5:138264930-138265088 | CCTGTGATCTTTGTCTGGGT    |
| CTNNA1.13.1.CTNNA1.1_R | chr5:138264930-138265088 | CAAGAAAGGGGACAGGGAAA    |
| CTNNA1.6.1.CTNNA1.1_F  | chr5:138163224-138163383 | GAAACAAATCATTTGGGACCC   |
| CTNNA1.6.1.CTNNA1.1_R  | chr5:138163224-138163383 | CCATGTAATCCGAAAGCAG     |
| CTNNA1.6.2.CTNNA1.2_F  | chr5:138163363-138163515 | TTGTGGCAGAGTGAATGCT     |
| CTNNA1.6.2.CTNNA1.2_R  | chr5:138163363-138163515 | ACCTACTCCCAAAATCAAGGA   |
| CTNNA1.6.2.CTNNA1.3_F  | chr5:138163078-138163223 | GGCCCTTACCTGCTAAGAAG    |
| CTNNA1.6.2.CTNNA1.3_R  | chr5:138163078-138163223 | CTCCTCGCTGAAGCTCAAG     |
| CTNNA1.3.1.CTNNA1.1_F  | chr5:138145746-138145896 | GGTGATTTGATGAAGGCTGC    |
| CTNNA1.3.1.CTNNA1.1_R  | chr5:138145746-138145896 | ACAGACATAGGCCCTGTATACT  |
| CTNNA1.3.2.CTNNA1.2_F  | chr5:138145597-138145747 | AGGAACAGCAAACAACAACA    |
| CTNNA1.3.2.CTNNA1.2_R  | chr5:138145597-138145747 | ATCATCTGCGAACTCTCCTG    |
| CTNNA1.9.1.CTNNA1.1_F  | chr5:138239983-138240141 | TAGGGCCAGGTGTGTGTTT     |
| CTNNA1.9.1.CTNNA1.1_R  | chr5:138239983-138240141 | TATGCTGTACCAGTGTCCAG    |
| CTNNA1.12.1.CTNNA1.1_F | chr5:138260943-138261102 | TACTGTGCCTCTTTCTCCAC    |
| CTNNA1.12.1.CTNNA1.1_R | chr5:138260943-138261102 | AAGACGTCTGAAATGCAGTT    |
| CTNNA1.15.1.CTNNA1.1_F | chr5:138266491-138266625 | GTGAGGGGCTTCACATACAA    |
| CTNNA1.15.1.CTNNA1.1_R | chr5:138266491-138266625 | CCTGGCAAGTCTGTCACTTA    |
| CTNNA1.14.1.CTNNA1.1_F | chr5:138266171-138266331 | CTTGATCACAGGCGATCATG    |
| CTNNA1.14.1.CTNNA1.1_R | chr5:138266171-138266331 | TGCTCACCCGGTAAAGTCT     |
| CTNNA1.14.2.CTNNA1.2_F | chr5:138266299-138266434 | AATGACATCATTGTGCTGGC    |
| CTNNA1.14.2.CTNNA1.2_R | chr5:138266299-138266434 | GAAGATTGTCCACAAAGCCC    |
| CTNNA1.14.2.CTNNA1.3_F | chr5:138266045-138266189 | CCTTCAGGCGAAATGAAACC    |
| CTNNA1.14.2.CTNNA1.3_R | chr5:138266045-138266189 | TTCCGCAATCTTCGCTTTT     |
| CTNNA1.8.1.CTNNA1.1_F  | chr5:138223193-138223353 | ATTAGCTCCGCAAAGCTGT     |
| CTNNA1.8.1.CTNNA1.1_R  | chr5:138223193-138223353 | ACCAAGTTGCCTACAAGTCA    |
| CTNNA1.8.2.CTNNA1.2_F  | chr5:138223072-138223215 | TCCTCATGTAAGTGCAGCAA    |
| CTNNA1.8.2.CTNNA1.2_R  | chr5:138223072-138223215 | TGGAACATTGGTTTCCAGGA    |
| CTNNA1.4.1.CTNNA1.1_F  | chr5:138147863-138147991 | TGGGTTTGGGGTCTTTCTT     |
| CTNNA1.4.1.CTNNA1.1_R  | chr5:138147863-138147991 | ATCCCCAAATCATGACTGTAC   |
| CTNNA1.10.1.CTNNA1.1_F | chr5:138253446-138253598 | TGCAGGTTATTAATGCTGCA    |
| CTNNA1.10.1.CTNNA1.1_R | chr5:138253446-138253598 | TCACATACTTCTCTGGGGAAC   |
| CTNNA1.10.2.CTNNA1.2_F | chr5:138253360-138253518 | CATGTGGTGTGATGTCTCCT    |
| CTNNA1.10.2.CTNNA1.2_R | chr5:138253360-138253518 | TGTGAGAACACGGACTTGTT    |
| CTNNA1.5.1.CTNNA1.1_F  | chr5:138160248-138160411 | ATGTTGGCCATCGTGATCA     |
| CTNNA1.5.1.CTNNA1.1_R  | chr5:138160248-138160411 | ATCGTCTGAGGCAGTGG       |
| CTNNA1.5.2.CTNNA1.2_F  | chr5:138160346-138160497 | TGATGTCGCGCCTATAAGG     |
| CTNNA1.5.2.CTNNA1.2_R  | chr5:138160346-138160497 | CTGGAAATTTCCACCCAAGC    |
| CTNNA1.5.2.CTNNA1.3_F  | chr5:138160192-138160323 | AGCCCATATAAAGAGTGCTCC   |
| CTNNA1.5.2.CTNNA1.3_R  | chr5:138160192-138160323 | TTATAGGCTGCGACATCAGG    |
| CDH1.6.1.CDH1.1_F      | chr16:68844120-68844278  | CTTCTCTCACGCTGTGTC      |
| CDH1.6.1.CDH1.1_R      | chr16:68844120-68844278  | GGTCCAAAGAACCTAAGAGTCT  |
| CDH1.6.2.CDH1.2_F      | chr16:68844059-68844197  | CCCCTTCTCCCATGTTTCT     |
| CDH1.6.2.CDH1.2_R      | chr16:68844059-68844197  | CCTTAAAGACCTCCTGGGTG    |
| CDH1.11.1.CDH1.1_F     | chr16:68853182-68853337  | AGAGCTTGTCCCGTTCA       |

|                       |                         |                        |
|-----------------------|-------------------------|------------------------|
| CDH1.11.1.CDH1.1_R    | chr16:68853182-68853337 | AGCAAAGGCTCAGATGAGG    |
| CDH1.3.1.CDH1.1_F     | chr16:68835583-68835742 | TGCCCTGCAGTGAATTTTGA   |
| CDH1.3.1.CDH1.1_R     | chr16:68835583-68835742 | GTATTCAGCGTGACTTTGGT   |
| CDH1.3.2.CDH1.2_F     | chr16:68835685-68835824 | AAAAGGCCTCTACGGTTTCA   |
| CDH1.3.2.CDH1.2_R     | chr16:68835685-68835824 | ACAGCGCACTAAAAACAACAG  |
| CDH1.3.2.CDH1.3_F     | chr16:68835513-68835662 | ACAAGTTCGCTCTTTGGAGA   |
| CDH1.3.2.CDH1.3_R     | chr16:68835513-68835662 | AAACCCGTAGAGGCCTTTTGA  |
| CDH1.7.1.CDH1.1_F     | chr16:68845604-68845763 | CAGGAACCTCTGTGATGGAG   |
| CDH1.7.1.CDH1.1_R     | chr16:68845604-68845763 | ATCCTCCTGACCCCTGA      |
| CDH1.7.2.CDH1.2_F     | chr16:68845505-68845655 | ATGTCCCCTCCTTTATCCCT   |
| CDH1.7.2.CDH1.2_R     | chr16:68845505-68845655 | TTGGCTGAGGATGGTGTAA    |
| CDH1.9.1.CDH1.1_F     | chr16:68847236-68847396 | AAGGGTCAGGTGCCTGA      |
| CDH1.9.1.CDH1.1_R     | chr16:68847236-68847396 | GCCAGGTACCATACAAACCT   |
| CDH1.9.2.CDH1.2_F     | chr16:68847266-68847408 | AACGTGTAATCACCCACT     |
| CDH1.9.2.CDH1.2_R     | chr16:68847266-68847408 | TTTCTGCATCTTGCCAGGTA   |
| CDH1.9.2.CDH1.3_F     | chr16:68847097-68847245 | TCAAATACACTCCAGCCTGG   |
| CDH1.9.2.CDH1.3_R     | chr16:68847097-68847245 | AGTGTGGTATTACGACGTT    |
| CDH1.12.1.CDH1.1_F    | chr16:68855944-68856103 | ACAGGGACACTTCTGCTGAT   |
| CDH1.12.1.CDH1.1_R    | chr16:68855944-68856103 | TCGTTGTAATGATGGTCCA    |
| CDH1.12.2.CDH1.2_F    | chr16:68856080-68856223 | CATCTCCCTTACACAGCAGAA  |
| CDH1.12.2.CDH1.2_R    | chr16:68856080-68856223 | TCAATGGAAGGGGTGACATC   |
| CDH1.12.2.CDH1.3_F    | chr16:68855844-68855999 | TCTAGACTTGGTCTGGTGGGA  |
| CDH1.12.2.CDH1.3_R    | chr16:68855844-68855999 | AGGCTTTGGATTCTCTCAC    |
| CDH1.2.1.CDH1.1_F     | chr16:68772193-68772345 | GTTCATCTACCTTTCCCCC    |
| CDH1.2.1.CDH1.1_R     | chr16:68772193-68772345 | TTTCCAACCCCTCCCTACT    |
| CDH1.15.1.CDH1.1_F    | chr16:68863574-68863730 | AAGGACTTTGACTTGAGCCA   |
| CDH1.15.1.CDH1.1_R    | chr16:68863574-68863730 | CCTGAGCTTAGAGATGAGCC   |
| CDH1.15.2.CDH1.2_F    | chr16:68863505-68863664 | CTGAACATAGCCCTGTGTGT   |
| CDH1.15.2.CDH1.2_R    | chr16:68863505-68863664 | CCAATTTCAATCGGGATTGGC  |
| CDH1.14.1.CDH1.1_F    | chr16:68862064-68862218 | TCAACACTTGCTCTGTCTCC   |
| CDH1.14.1.CDH1.1_R    | chr16:68862064-68862218 | CCACTGAGCTACCAAGGTTT   |
| CDH1.8.1.CDH1.1_F     | chr16:68846038-68846184 | TTGTGTCGATCTCTCTGCAG   |
| CDH1.8.1.CDH1.1_R     | chr16:68846038-68846184 | ACCTTTCTTTGGAAACCCCTCT |
| CDH1.4.1.CDH1.1_F     | chr16:68842334-68842486 | TCCTTCCCTTTAGGCCCTCCG  |
| CDH1.4.1.CDH1.1_R     | chr16:68842334-68842486 | ATCCCTCCCAGAGAAACAGA   |
| CDH1.4.2.CDH1.2_F     | chr16:68842229-68842380 | TTCAAAGCTGACACTGCCCA   |
| CDH1.4.2.CDH1.2_R     | chr16:68842229-68842380 | CTCTTCTGTCTTCTGAGGCC   |
| CDH1.1.1.CDH1.1_F     | chr16:68771230-68771374 | CAAAGCACCTGTGAGCTTG    |
| CDH1.1.1.CDH1.1_R     | chr16:68771230-68771374 | TCGCAAGTCAGGGGATC      |
| CDH1.10.1.CDH1.1_F    | chr16:68849438-68849598 | GGCTTGGATTTTGAGGCCAA   |
| CDH1.10.1.CDH1.1_R    | chr16:68849438-68849598 | GATGTGATTTCCCTGGCCCA   |
| CDH1.10.2.CDH1.2_F    | chr16:68849541-68849678 | TGGATGTGCTGGATGTGAAT   |
| CDH1.10.2.CDH1.2_R    | chr16:68849541-68849678 | GTTGCTGCAAGTCAGTTGAA   |
| CDH1.10.2.CDH1.3_F    | chr16:68849308-68849460 | TGGCAGAAACCACAGTTACT   |
| CDH1.10.2.CDH1.3_R    | chr16:68849308-68849460 | AGGTACCACATTCGTCACTG   |
| CDH1.13.1.CDH1.1_F    | chr16:68857386-68857544 | TCAAGCTCATGGATAACCAGA  |
| CDH1.13.1.CDH1.1_R    | chr16:68857386-68857544 | AGTCAAAGGCTGAGTCACTT   |
| CDH1.13.2.CDH1.2_F    | chr16:68857228-68857387 | GGGGTGTCTTTAGTTCACT    |
| CDH1.13.2.CDH1.2_R    | chr16:68857228-68857387 | AAGGTGGTCACTTGGTCTTT   |
| CDH1.16.1.CDH1.1_F    | chr16:68867272-68867431 | TGACTATGAAGGAAGCGGTT   |
| CDH1.16.1.CDH1.1_R    | chr16:68867272-68867431 | TTCTGCATTTCCAGCACAT    |
| CDH1.16.2.CDH1.2_F    | chr16:68867136-68867281 | ATTGTAGACTTCTTGCCCC    |
| CDH1.16.2.CDH1.2_R    | chr16:68867136-68867281 | AGTTCAGGGAGCTCAGACTA   |
| CDH1.5.1.CDH1.1_F     | chr16:68842624-68842763 | CCAACAAAGACAAGAAGGCA   |
| CDH1.5.1.CDH1.1_R     | chr16:68842624-68842763 | CCGGTGTCAACAAGCTTCTA   |
| CDH1.5.2.CDH1.2_F     | chr16:68842564-68842715 | CCAGTGTGGGATCCTTCTT    |
| CDH1.5.2.CDH1.2_R     | chr16:68842564-68842715 | CGTTCTCTATCCAGAGGCTC   |
| CDKN2A.1.1.CDKN2A.1_F | chr9:21968220-21968350  | GAGGTTTCTCAGAGCCTCTC   |
| CDKN2A.1.1.CDKN2A.1_R | chr9:21968220-21968350  | GAAGCCATTGCGAGAAGCTT   |
| CDKN2A.4.1.CDKN2A.1_F | chr9:21974496-21974658  | TCATTCTCTTCTTGGCTT     |
| CDKN2A.4.1.CDKN2A.1_R | chr9:21974496-21974658  | TGGGTAGAGGGTCTGCA      |
| CDKN2A.4.2.CDKN2A.2_F | chr9:21974467-21974615  | ATTCGAGAGATCTGTACGGG   |
| CDKN2A.4.2.CDKN2A.2_R | chr9:21974467-21974615  | ACTCTGGAGGACGAAGTTTG   |
| CDKN2A.4.3.CDKN2A.3_F | chr9:21974636-21974791  | CAAACCTCGTCCCTCCAGAGT  |
| CDKN2A.4.3.CDKN2A.3_R | chr9:21974636-21974791  | AGCAGCATGGAGCCTTC      |
| CDKN2A.4.4.CDKN2A.4_F | chr9:21974759-21974911  | GCACCTCCTTACCCGA       |
| CDKN2A.4.4.CDKN2A.4_R | chr9:21974759-21974911  | GAAGAAAGAGGAGGGCTG     |

|                       |                         |                          |
|-----------------------|-------------------------|--------------------------|
| CDKN2A.3.1.CDKN2A.1_F | chr9:21971091-21971250  | ACCAGCGTGTCCAGGAA        |
| CDKN2A.3.1.CDKN2A.1_R | chr9:21971091-21971250  | CAAGCTTCCTTCCCGTCATG     |
| CDKN2A.3.4.CDKN2A.2_F | chr9:21970906-21971070  | TCATCAGTCCTCACCTGAG      |
| CDKN2A.3.4.CDKN2A.2_R | chr9:21970906-21971070  | TGGACACGCTGGTGGT         |
| CDKN2A.3.5.CDKN2A.3_F | chr9:21970763-21970919  | AGGGCGATAGGGAGACTCA      |
| CDKN2A.3.5.CDKN2A.3_R | chr9:21970763-21970919  | GTAACCATGCCCGCATAGAT     |
| CDKN2A.3.6.CDKN2A.4_F | chr9:21971015-21971160  | CTCCTCAGCCAGGTCCA        |
| CDKN2A.3.6.CDKN2A.4_R | chr9:21971015-21971160  | AGCTGCTGCTGCTCCA         |
| CDKN2A.2.1.CDKN2A.1_F | chr9:21968680-21968819  | CAGCTTGCGATAACCAAAGG     |
| CDKN2A.2.1.CDKN2A.1_R | chr9:21968680-21968819  | ACGCAACGAGATTAGAGAGG     |
| CDKN2A.5.1.CDKN2A.1_F | chr9:21994137-21994297  | CTTTTCGAGGGCCTTTCCTA     |
| CDKN2A.5.1.CDKN2A.1_R | chr9:21994137-21994297  | TTGGTGACCTCCGGATT        |
| CDKN2A.5.2.CDKN2A.2_F | chr9:21994270-21994411  | GATGTGAACCACGAAAACCC     |
| CDKN2A.5.2.CDKN2A.2_R | chr9:21994270-21994411  | GTCCCAGTCTGCAGTTAAGG     |
| CYP2D6.6.1.CYP2D6.1_F | chr22:42524813-42524957 | AAGCCCCGACTCCTCCTT       |
| CYP2D6.6.1.CYP2D6.1_R | chr22:42524813-42524957 | ACCCCTTACCCGCATCT        |
| CYP2D6.6.2.CYP2D6.2_F | chr22:42524692-42524851 | AATGTCTTTCCCAAACCCA      |
| CYP2D6.6.2.CYP2D6.2_R | chr22:42524692-42524851 | TTCGAGTACGACGACCCT       |
| CYP2D6.3.1.CYP2D6.1_F | chr22:42523458-42523618 | CCAGGCCTACCTTAGGGAT      |
| CYP2D6.3.1.CYP2D6.1_R | chr22:42523458-42523618 | CCGTGTCCAACAGGAGA        |
| CYP2D6.3.2.CYP2D6.2_F | chr22:42523561-42523717 | AATCAGGGCAGTGGTGTAG      |
| CYP2D6.3.2.CYP2D6.2_R | chr22:42523561-42523717 | GATCCTGTAAGCCTGACCTC     |
| CYP2D6.3.2.CYP2D6.3_F | chr22:42523352-42523482 | GTGGCATTGAGGACTAGGTG     |
| CYP2D6.3.2.CYP2D6.3_R | chr22:42523352-42523482 | GTGACCCATATGACATCCCC     |
| CYP2D6.7.3.CYP2D6.1_F | chr22:42525026-42525167 | TTTGTGCCCTTCTGCC         |
| CYP2D6.7.3.CYP2D6.1_R | chr22:42525026-42525167 | TGTTCCGGCGCGTAT          |
| CYP2D6.7.4.CYP2D6.2_F | chr22:42525106-42525247 | TGTCACGACACTTCTTG        |
| CYP2D6.7.4.CYP2D6.2_R | chr22:42525106-42525247 | GAGCATAGGGTTGGAGTGG      |
| CYP2D6.9.1.CYP2D6.1_F | chr22:42526623-42526784 | TCCCTCACCTGGTCGAA        |
| CYP2D6.9.1.CYP2D6.1_R | chr22:42526623-42526784 | AGGCAGGTATGGGGCTA        |
| CYP2D6.9.2.CYP2D6.2_F | chr22:42526638-42526793 | TCGAAGCAGTATGGTGTGT      |
| CYP2D6.9.2.CYP2D6.2_R | chr22:42526638-42526793 | CATTTGGTAGTGAGGCAGGT     |
| CYP2D6.9.2.CYP2D6.3_F | chr22:42526486-42526627 | AAATGCCCTTCTCCAGGAAG     |
| CYP2D6.9.2.CYP2D6.3_R | chr22:42526486-42526627 | GGACTTCCAGAAACACCCAT     |
| CYP2D6.2.1.CYP2D6.1_F | chr22:42522863-42523023 | ACAGGCACCTGCTGAGAA       |
| CYP2D6.2.1.CYP2D6.1_R | chr22:42522863-42523023 | CAGCATCCTAGAGTCCAGTC     |
| CYP2D6.2.2.CYP2D6.2_F | chr22:42522815-42522968 | GTGATACCCCTGCAAGACTC     |
| CYP2D6.2.2.CYP2D6.2_R | chr22:42522815-42522968 | ACACTCATCACCACCTGTCT     |
| CYP2D6.8.1.CYP2D6.1_F | chr22:42525748-42525909 | GCCTGTGCCTTGGGAA         |
| CYP2D6.8.1.CYP2D6.1_R | chr22:42525748-42525909 | ACCCTCCCTCTGCAGTT        |
| CYP2D6.8.2.CYP2D6.2_F | chr22:42525863-42526002 | ATTGAGCACGACCACCG        |
| CYP2D6.8.2.CYP2D6.2_R | chr22:42525863-42526002 | ACCTGCTCACTCCTGGTAG      |
| CYP2D6.8.2.CYP2D6.3_F | chr22:42525724-42525875 | CCACGGAAATCTGTCTCTGT     |
| CYP2D6.8.2.CYP2D6.3_R | chr22:42525724-42525875 | ACGTGTTACGCTTCAG         |
| CYP2D6.4.1.CYP2D6.1_F | chr22:42523838-42523998 | TGCACTGTTTCCCAGATGG      |
| CYP2D6.4.1.CYP2D6.1_R | chr22:42523838-42523998 | TTCTGTCCCAGATATGCTCT     |
| CYP2D6.1.5.CYP2D6.1_F | chr22:42522635-42522794 | CACCAGGAAAGCAAAGACAC     |
| CYP2D6.1.5.CYP2D6.1_R | chr22:42522635-42522794 | GAGTCTTGCAAGGGTATCAC     |
| CYP2D6.1.6.CYP2D6.2_F | chr22:42522516-42522670 | CCGAGTTGGAACCTACCACAT    |
| CYP2D6.1.6.CYP2D6.2_R | chr22:42522516-42522670 | CTGCAGCACTTCAGCTTCT      |
| CYP2D6.5.1.CYP2D6.1_F | chr22:42524186-42524346 | CCACTCTCACCTTCTCCATC     |
| CYP2D6.5.1.CYP2D6.1_R | chr22:42524186-42524346 | CTGTCTGGTGTAGGTGCTG      |
| CYP2D6.5.2.CYP2D6.2_F | chr22:42524256-42524395 | GGTCATCCTGTGCTCAGTTA     |
| CYP2D6.5.2.CYP2D6.2_R | chr22:42524256-42524395 | TGAGACTTGTCAGGTGAAC      |
| CYP2D6.5.2.CYP2D6.3_F | chr22:42524102-42524247 | ATGCACCTGGTCCAACCTTTT    |
| CYP2D6.5.2.CYP2D6.3_R | chr22:42524102-42524247 | TGGATGAGCTGCTAACTGAG     |
| KRAS.1.6.KRAS.1_F     | chr12:25362706-25362835 | ACCACCTGTACTAGTATGCCT    |
| KRAS.1.6.KRAS.1_R     | chr12:25362706-25362835 | TTTATGTATTTCCAGGGTGTGATG |
| KRAS.1.7.KRAS.2_F     | chr12:25362761-25362887 | ACACACTTTGTCTTTGACTTCT   |
| KRAS.1.7.KRAS.2_R     | chr12:25362761-25362887 | TGTTACCTGTACACATGAAGC    |
| KRAS.4.1.KRAS.1_F     | chr12:25380235-25380366 | TACACAAAGAAAGCCCTCCC     |
| KRAS.4.1.KRAS.1_R     | chr12:25380235-25380366 | AGGTGCACTGTAATAATCCAGA   |
| KRAS.4.4.KRAS.2_F     | chr12:25380106-25380250 | TGCATTGGCATTAGCAAAGAC    |
| KRAS.4.4.KRAS.2_R     | chr12:25380106-25380250 | AGTACAGTGCAATGAGGGAC     |
| KRAS.3.1.KRAS.1_F     | chr12:25378606-25378763 | TCCATAACTTCTTGCTAAGTCC   |
| KRAS.3.1.KRAS.1_R     | chr12:25378606-25378763 | GACAAAAGTTGTGGACAGGT     |
| KRAS.3.5.KRAS.2_F     | chr12:25378526-25378660 | TGATTTTGCAGAAAACAGATCTG  |

|                        |                          |                        |
|------------------------|--------------------------|------------------------|
| KRAS.3.5.KRAS.2_R      | chr12:25378526-25378660  | TCTGAAGATGTACCTATGGTCC |
| KRAS.2.1.KRAS.1_F      | chr12:25368374-25368522  | GTGCTGAACCTAAACTTACCAG |
| KRAS.2.1.KRAS.1_R      | chr12:25368374-25368522  | ACTCTTACCAATGCAACAGAC  |
| KRAS.5.2.KRAS.1_F      | chr12:25398179-25398312  | TCAAAGAATGGTCTGCACC    |
| KRAS.5.2.KRAS.1_R      | chr12:25398179-25398312  | AAGGCCTGCTGAAAATGACT   |
| KRAS.5.3.KRAS.2_F      | chr12:25398269-25398395  | ATTAGCTGTATCGTCAAGGCA  |
| KRAS.5.3.KRAS.2_R      | chr12:25398269-25398395  | AAAGGTAAGTGGTGGAGTATTG |
| CTNNB1.6.1.CTNNB1.1_F  | chr3:41268718-41268865   | AGCTCATCATACTGGCTAGTG  |
| CTNNB1.6.1.CTNNB1.1_R  | chr3:41268718-41268865   | TGCAGATGCTATACACAAGACT |
| CTNNB1.6.2.CTNNB1.2_F  | chr3:41268654-41268809   | TGGCTCTTCTCAGACATGTG   |
| CTNNB1.6.2.CTNNB1.2_R  | chr3:41268654-41268809   | GCCGGCTTATTACTAGAGCA   |
| CTNNB1.11.1.CTNNB1.1_F | chr3:41277844-41278000   | TGTGTTTTCTCCTTAGCTGC   |
| CTNNB1.11.1.CTNNB1.1_R | chr3:41277844-41278000   | TGCTAAAGGCTTTGGTTCCT   |
| CTNNB1.11.2.CTNNB1.2_F | chr3:41277760-41277890   | GCCTCTTGCACTCTGAATTG   |
| CTNNB1.11.2.CTNNB1.2_R | chr3:41277760-41277890   | TTGTCTGAGCAAGTTCACA    |
| CTNNB1.3.1.CTNNB1.1_F  | chr3:41266483-41266644   | CAATGACTCGAGCTCAGAGG   |
| CTNNB1.3.1.CTNNB1.1_R  | chr3:41266483-41266644   | GATTGCACGTGTGGCAAG     |
| CTNNB1.3.2.CTNNB1.2_F  | chr3:41266609-41266742   | CACAGATGCTGAAACATGCA   |
| CTNNB1.3.2.CTNNB1.2_R  | chr3:41266609-41266742   | GAAACTACTCCCCTTGAGCA   |
| CTNNB1.3.2.CTNNB1.3_F  | chr3:41266423-41266558   | TGCTGAACTGTGGATAGTGA   |
| CTNNB1.3.2.CTNNB1.3_R  | chr3:41266423-41266558   | CAAACGCTGGACATTAGTGG   |
| CTNNB1.7.1.CTNNB1.1_F  | chr3:41274810-41274947   | TCTAGCTAATGACTAGGGCCT  |
| CTNNB1.7.1.CTNNB1.1_R  | chr3:41274810-41274947   | ATTCACATGGCACCAGTTTA   |
| CTNNB1.9.1.CTNNB1.1_F  | chr3:41275640-41275798   | CTGTTTTTCAGGCTACTGTTG  |
| CTNNB1.9.1.CTNNB1.1_R  | chr3:41275640-41275798   | AGCCAGGTATCACTGTAAGA   |
| CTNNB1.9.2.CTNNB1.2_F  | chr3:41275495-41275647   | GTAGGAAGTATGGCTGCGAT   |
| CTNNB1.9.2.CTNNB1.2_R  | chr3:41275495-41275647   | GGACAAAGGGCAAGATTTCG   |
| CTNNB1.12.1.CTNNB1.1_F | chr3:41278074-41278233   | GGCCCTTTTTCTCCTTGCTC   |
| CTNNB1.12.1.CTNNB1.1_R | chr3:41278074-41278233   | GCCATACCTGCTCTAGGAAA   |
| CTNNB1.2.1.CTNNB1.1_F  | chr3:41266047-41266206   | AGTTGGACATGGCCATGG     |
| CTNNB1.2.1.CTNNB1.1_R  | chr3:41266047-41266206   | GTGAAGGACTGAGAAAATCCC  |
| CTNNB1.2.2.CTNNB1.2_F  | chr3:41266126-41266265   | ATCCATTCTGGTGCCACTAC   |
| CTNNB1.2.2.CTNNB1.2_R  | chr3:41266126-41266265   | GCATTCTGACTTTCAGTAAGGC |
| CTNNB1.2.2.CTNNB1.3_F  | chr3:41265901-41266051   | TCTGCTTTTTCTGGCTGTCT   |
| CTNNB1.2.2.CTNNB1.3_R  | chr3:41265901-41266051   | CTAACAGCCGCTTTTCTGTCT  |
| CTNNB1.14.1.CTNNB1.1_F | chr3:41280625-41280785   | TGACACCCTGACTCTTCTAG   |
| CTNNB1.14.1.CTNNB1.1_R | chr3:41280625-41280785   | GATTGCTGTACCTGGAGG     |
| CTNNB1.14.2.CTNNB1.2_F | chr3:41280747-41280906   | ACTATCCAGTTGATGGGCTG   |
| CTNNB1.14.2.CTNNB1.2_R | chr3:41280747-41280906   | ACCCACCAACCAAGTCTTT    |
| CTNNB1.8.1.CTNNB1.1_F  | chr3:41275040-41275199   | GAAGGGATGGAAGGTCTCCT   |
| CTNNB1.8.1.CTNNB1.1_R  | chr3:41275040-41275199   | TCAGTGATGCTTCCCTGTC    |
| CTNNB1.8.2.CTNNB1.2_F  | chr3:41274975-41275133   | GTGCCATGGGAATAGAGTCA   |
| CTNNB1.8.2.CTNNB1.2_R  | chr3:41274975-41275133   | TGGCAGACCATCATCTTGTT   |
| CTNNB1.8.2.CTNNB1.3_F  | chr3:41275240-41275397   | CCTGCCATCTGTGCTCTCTC   |
| CTNNB1.8.2.CTNNB1.3_R  | chr3:41275240-41275397   | CAGCTAGAGATGCTTCATTTTC |
| CTNNB1.8.3.CTNNB1.4_F  | chr3:41275176-41275319   | TGGGTGGTATAGAGGCTCTT   |
| CTNNB1.8.3.CTNNB1.4_R  | chr3:41275176-41275319   | GATGGTGGGTGTAAGAGCTT   |
| CTNNB1.1.1.CTNNB1.1_F  | chr3:41265557-41265709   | GTTTTGAAAATCCAGCGTGG   |
| CTNNB1.1.1.CTNNB1.1_R  | chr3:41265557-41265709   | TTCAACCAAGCCATTAGGAGG  |
| CTNNB1.4.1.CTNNB1.1_F  | chr3:41266913-41267071   | CATGCGTTCTCCTCAGATGG   |
| CTNNB1.4.1.CTNNB1.1_R  | chr3:41266913-41267071   | GCTTCAAGCATTCTGACATGT  |
| CTNNB1.4.2.CTNNB1.2_F  | chr3:41266764-41266916   | GCTCAAGGGGAGTAGTTTCA   |
| CTNNB1.4.2.CTNNB1.2_R  | chr3:41266764-41266916   | TGCATGGTACGTACAATAGCA  |
| CTNNB1.10.4.CTNNB1.1_F | chr3:41277190-41277319   | TACAGAGGAGAATGCCCTGT   |
| CTNNB1.10.4.CTNNB1.1_R | chr3:41277190-41277319   | ACATACCTGCACAACAATGG   |
| CTNNB1.10.5.CTNNB1.2_F | chr3:41277258-41277415   | AGTTGAAGGTTGTACCGGAG   |
| CTNNB1.10.5.CTNNB1.2_R | chr3:41277258-41277415   | TGGTAACCCCTATTATGGTCCC |
| CTNNB1.13.1.CTNNB1.1_F | chr3:41279495-41279638   | TCTATTCTTCTCTGCTTTGTGC |
| CTNNB1.13.1.CTNNB1.1_R | chr3:41279495-41279638   | TGGTTTTCCAGATGAGCAAA   |
| CTNNB1.5.1.CTNNB1.1_F  | chr3:41267171-41267330   | TTCACCAGTGGATTCTGTGT   |
| CTNNB1.5.1.CTNNB1.1_R  | chr3:41267171-41267330   | TGCTTTCTTGGTTGCCATAA   |
| CTNNB1.5.2.CTNNB1.2_F  | chr3:41267276-41267426   | GAAAATGGTTGCCTTGCTCA   |
| CTNNB1.5.2.CTNNB1.2_R  | chr3:41267276-41267426   | TGGTGCCAAAAGGTTAGGA    |
| CTNNB1.5.2.CTNNB1.3_F  | chr3:41267045-41267177   | TAAGTCTGGAGGCATTCCCTG  |
| CTNNB1.5.2.CTNNB1.3_R  | chr3:41267045-41267177   | TGTGGAGAGTTGTAATGGCA   |
| ABL2.6.1.ABL2.1_F      | chr1:179086469-179086629 | AGTCCCTTTCAACCTTACCC   |
| ABL2.6.1.ABL2.1_R      | chr1:179086469-179086629 | TCTTGCAGCTCGTAACTGC    |

|                     |                          |                         |
|---------------------|--------------------------|-------------------------|
| ABL2.6.2.ABL2.2_F   | chr1:179086530-179086688 | CTCTGGTGTCTGCCACTTAA    |
| ABL2.6.2.ABL2.2_R   | chr1:179086530-179086688 | TCATGACCATTTCCTCACCA    |
| ABL2.6.2.ABL2.3_F   | chr1:179086376-179086509 | TGGCAGGTAAAGGTAGAGGA    |
| ABL2.6.2.ABL2.3_R   | chr1:179086376-179086509 | TTAAGTGGACAGCACCAGAG    |
| ABL2.11.1.ABL2.1_F  | chr1:179100465-179100620 | ACCTTTAGTGATGCTGAGTGT   |
| ABL2.11.1.ABL2.1_R  | chr1:179100465-179100620 | TCCTTCCCTTCTTATGTCTT    |
| ABL2.11.2.ABL2.2_F  | chr1:179100445-179100592 | GGATGCTACATAGAAGCCTCA   |
| ABL2.11.2.ABL2.2_R  | chr1:179100445-179100592 | TTTGCATCGTCCCTATGGTT    |
| ABL2.3.1.ABL2.1_F   | chr1:179079837-179079982 | GCATGCCAACGTGTGAATAT    |
| ABL2.3.1.ABL2.1_R   | chr1:179079837-179079982 | CGTATACCCTGTGATCCACC    |
| ABL2.7.1.ABL2.1_F   | chr1:179087780-179087939 | AGAAGAAATCTGAGTGGCCA    |
| ABL2.7.1.ABL2.1_R   | chr1:179087780-179087939 | AGTGGTTTGAGAGTGTGAA     |
| ABL2.7.2.ABL2.2_F   | chr1:179087689-179087821 | CTGCATGTCAAGCAAGATGG    |
| ABL2.7.2.ABL2.2_R   | chr1:179087689-179087821 | TTTGCTGGATTACCTCCGAG    |
| ABL2.9.1.ABL2.1_F   | chr1:179090730-179090889 | TGTAATTCTCAGCAACCCAC    |
| ABL2.9.1.ABL2.1_R   | chr1:179090730-179090889 | TACCCAGCACCCAAGTGTAA    |
| ABL2.9.2.ABL2.2_F   | chr1:179090860-179091002 | CCATTTCCCATTTGTCGTGG    |
| ABL2.9.2.ABL2.2_R   | chr1:179090860-179091002 | GCTTTTCTCCTTTTCTTACCAG  |
| ABL2.12.1.ABL2.1_F  | chr1:179102420-179102577 | ACTGCCAATGCCCTTAGTCA    |
| ABL2.12.1.ABL2.1_R  | chr1:179102420-179102577 | TGAATGCCATGAAAAGGAGAC   |
| ABL2.2.1.ABL2.1_F   | chr1:179079416-179079576 | ACCTGCTAAGGGACCCATA     |
| ABL2.2.1.ABL2.1_R   | chr1:179079416-179079576 | TCACAGAGGTAGCTGAGGAG    |
| ABL2.2.2.ABL2.2_F   | chr1:179079506-179079660 | CCTGTTTCTTCAGTGTCCGA    |
| ABL2.2.2.ABL2.2_R   | chr1:179079506-179079660 | TCCTTCTCAGTTGTGTGCTT    |
| ABL2.14.1.ABL2.1_F  | chr1:179198403-179198564 | GGTGAAGATATTGAAGCCGG    |
| ABL2.14.1.ABL2.1_R  | chr1:179198403-179198564 | AGGAATGTGACCAGGGGT      |
| ABL2.14.12.ABL2.2_F | chr1:179198376-179198517 | GCTCCAGACACACTCAC       |
| ABL2.14.12.ABL2.2_R | chr1:179198376-179198517 | GATGGGGCAGCAGGTG        |
| ABL2.8.1.ABL2.1_F   | chr1:179089298-179089436 | GGCAAGCATTTTGGAGGAA     |
| ABL2.8.1.ABL2.1_R   | chr1:179089298-179089436 | GGTTTGTCCCTCTCGTTTTT    |
| ABL2.4.1.ABL2.1_F   | chr1:179081412-179081568 | CACCACCACACCAGAATT      |
| ABL2.4.1.ABL2.1_R   | chr1:179081412-179081568 | CCACTGGATATTGAATTTCTGC  |
| ABL2.1.1.ABL2.1_F   | chr1:179076851-179077012 | TTCCCACCAAGGTAACAGT     |
| ABL2.1.1.ABL2.1_R   | chr1:179076851-179077012 | TGGACTGCATCCCTCAAAC     |
| ABL2.1.2.ABL2.2_F   | chr1:179077010-179077172 | CTCGGAAGGCAAATTTGTTG    |
| ABL2.1.2.ABL2.2_R   | chr1:179077010-179077172 | AACCAAACAGGCCGCTG       |
| ABL2.1.3.ABL2.3_F   | chr1:179077182-179077342 | GAGATTTTCTCAGCGGCCCT    |
| ABL2.1.3.ABL2.3_R   | chr1:179077182-179077342 | TCCACATCAGAAACACAGGA    |
| ABL2.1.4.ABL2.4_F   | chr1:179077343-179077502 | AGCTGCCTTCTTTCTCCT      |
| ABL2.1.4.ABL2.4_R   | chr1:179077343-179077502 | TCTTATCTGAGCATCAGGTCA   |
| ABL2.1.4.ABL2.5_F   | chr1:179077049-179077197 | CCACATAGCCTGAGCAGTAG    |
| ABL2.1.4.ABL2.5_R   | chr1:179077049-179077197 | CAGCAGGTACTAAAGTGGCT    |
| ABL2.1.5.ABL2.6_F   | chr1:179077553-179077712 | ATTCCCCTGAGAGTCTGTG     |
| ABL2.1.5.ABL2.6_R   | chr1:179077553-179077712 | GTAAGAAGAGAAGATGGTGGGG  |
| ABL2.1.6.ABL2.7_F   | chr1:179077713-179077875 | AGCCATCCCAAGTCGTG       |
| ABL2.1.6.ABL2.7_R   | chr1:179077713-179077875 | AATCAGAGGAAAGTGCTGCT    |
| ABL2.1.6.ABL2.8_F   | chr1:179077477-179077608 | CACTTTGGTTTTACCCGTCG    |
| ABL2.1.6.ABL2.8_R   | chr1:179077477-179077608 | CCACTCACAACCACAAAGTG    |
| ABL2.1.7.ABL2.9_F   | chr1:179077886-179078046 | TGCTTGGAGCAGCACTT       |
| ABL2.1.7.ABL2.9_R   | chr1:179077886-179078046 | TCCAAGGTCAAACCTCTACATCT |
| ABL2.1.8.ABL2.10_F  | chr1:179078047-179078206 | AAGCCCTGAGGACATGGA      |
| ABL2.1.8.ABL2.10_R  | chr1:179078047-179078206 | AACCTCTGTAATGACGACGG    |
| ABL2.1.8.ABL2.11_F  | chr1:179077854-179078005 | TCCTCTGGGCAATAACTTGG    |
| ABL2.1.8.ABL2.11_R  | chr1:179077854-179078005 | GAGCAGGATAGGATGGCAAT    |
| ABL2.1.9.ABL2.12_F  | chr1:179078227-179078386 | CCGTCGTCATTACAGAGGTT    |
| ABL2.1.9.ABL2.12_R  | chr1:179078227-179078386 | AAACGCAGCAGCTCCTT       |
| ABL2.1.10.ABL2.13_F | chr1:179078387-179078549 | GCTGATTCTCCATTTCTCGG    |
| ABL2.1.10.ABL2.13_R | chr1:179078387-179078549 | AGGTGCACAGGCCTCTA       |
| ABL2.1.10.ABL2.14_F | chr1:179078165-179078307 | TAAAGAAGCCTGTGATGCCA    |
| ABL2.1.10.ABL2.14_R | chr1:179078165-179078307 | TTGCTTCTCTACAGCATGCT    |
| ABL2.1.11.ABL2.15_F | chr1:179078492-179078637 | AGCATGTCTCTTGGCATCT     |
| ABL2.1.11.ABL2.15_R | chr1:179078492-179078637 | CTCATAATGAGCCTCGGTA     |
| ABL2.10.1.ABL2.1_F  | chr1:179095512-179095671 | TGGTGACCAGGGAGTCTTAC    |
| ABL2.10.1.ABL2.1_R  | chr1:179095512-179095671 | AAACACTCCTGGTACCATGG    |
| ABL2.10.2.ABL2.2_F  | chr1:179095661-179095810 | AGATACTCAGCTGCACTGC     |
| ABL2.10.2.ABL2.2_R  | chr1:179095661-179095810 | TCCTGTGATGACCTTATGGC    |
| ABL2.13.1.ABL2.1_F  | chr1:179112043-179112185 | ATGTGGTTATCAAGCCTCCC    |

ABL2.13.1.ABL2.1\_R  
ABL2.5.1.ABL2.1\_F  
ABL2.5.1.ABL2.1\_R  
ABL2.5.2.ABL2.2\_F  
ABL2.5.2.ABL2.2\_R  
BRAF.11.3.BRAF.1\_F  
BRAF.11.3.BRAF.1\_R  
BRAF.11.11.BRAF.2\_F  
BRAF.11.11.BRAF.2\_R  
BRAF.7.5.BRAF.1\_F  
BRAF.7.5.BRAF.1\_R  
BRAF.17.13.BRAF.1\_F  
BRAF.17.13.BRAF.1\_R  
BRAF.2.3.BRAF.1\_F  
BRAF.2.3.BRAF.1\_R  
BRAF.2.6.BRAF.2\_F  
BRAF.2.6.BRAF.2\_R  
BRAF.1.3.BRAF.1\_F  
BRAF.1.3.BRAF.1\_R  
BRAF.1.4.BRAF.2\_F  
BRAF.1.4.BRAF.2\_R  
BRAF.18.9.BRAF.1\_F  
BRAF.18.9.BRAF.1\_R  
BRAF.18.10.BRAF.2\_F  
BRAF.18.10.BRAF.2\_R  
BRAF.13.11.BRAF.1\_F  
BRAF.13.11.BRAF.1\_R  
BRAF.13.12.BRAF.2\_F  
BRAF.13.12.BRAF.2\_R  
BRAF.16.1.BRAF.1\_F  
BRAF.16.1.BRAF.1\_R  
BRAF.16.2.BRAF.2\_F  
BRAF.16.2.BRAF.2\_R  
BRAF.16.2.BRAF.3\_F  
BRAF.16.2.BRAF.3\_R  
BRAF.6.7.BRAF.1\_F  
BRAF.6.7.BRAF.1\_R  
BRAF.6.8.BRAF.2\_F  
BRAF.6.8.BRAF.2\_R  
BRAF.3.3.BRAF.1\_F  
BRAF.3.3.BRAF.1\_R  
BRAF.3.4.BRAF.2\_F  
BRAF.3.4.BRAF.2\_R  
BRAF.9.1.BRAF.1\_F  
BRAF.9.1.BRAF.1\_R  
BRAF.9.2.BRAF.2\_F  
BRAF.9.2.BRAF.2\_R  
BRAF.12.1.BRAF.1\_F  
BRAF.12.1.BRAF.1\_R  
BRAF.14.13.BRAF.1\_F  
BRAF.14.13.BRAF.1\_R  
BRAF.15.1.BRAF.1\_F  
BRAF.15.1.BRAF.1\_R  
BRAF.8.1.BRAF.1\_F  
BRAF.8.1.BRAF.1\_R  
BRAF.4.1.BRAF.1\_F  
BRAF.4.1.BRAF.1\_R  
BRAF.4.2.BRAF.2\_F  
BRAF.4.2.BRAF.2\_R  
BRAF.10.1.BRAF.1\_F  
BRAF.10.1.BRAF.1\_R  
BRAF.5.1.BRAF.1\_F  
BRAF.5.1.BRAF.1\_R  
EGFR.11.1.EGFR.1\_F  
EGFR.11.1.EGFR.1\_R  
EGFR.21.1.EGFR.1\_F  
EGFR.21.1.EGFR.1\_R

chr1:179112043-179112185  
chr1:179084030-179084186  
chr1:179084030-179084186  
chr1:179083917-179084049  
chr1:179083917-179084049  
chr7:140494105-140494258  
chr7:140494105-140494258  
chr7:140494231-140494381  
chr7:140494231-140494381  
chr7:140477734-140477881  
chr7:140477734-140477881  
chr7:140549836-140550087  
chr7:140549836-140550087  
chr7:140439570-140439722  
chr7:140439570-140439722  
chr7:140439671-140439803  
chr7:140439671-140439803  
chr7:140434391-140434550  
chr7:140434391-140434550  
chr7:140434533-140434683  
chr7:140434533-140434683  
chr7:140624386-140624552  
chr7:140624386-140624552  
chr7:140624307-140624444  
chr7:140624307-140624444  
chr7:140501251-140501404  
chr7:140501251-140501404  
chr7:140501131-140501279  
chr7:140501131-140501279  
chr7:140534429-140534588  
chr7:140534429-140534588  
chr7:140534535-140534694  
chr7:140534535-140534694  
chr7:140534299-140534448  
chr7:140534299-140534448  
chr7:140476678-140476830  
chr7:140476678-140476830  
chr7:140476806-140476953  
chr7:140476806-140476953  
chr7:140449054-140449209  
chr7:140449054-140449209  
chr7:140449136-140449289  
chr7:140449136-140449289  
chr7:140482840-140482983  
chr7:140482840-140482983  
chr7:140482784-140482933  
chr7:140482784-140482933  
chr7:140500158-140500313  
chr7:140500158-140500313  
chr7:140507692-140507947  
chr7:140507692-140507947  
chr7:140508689-140508821  
chr7:140508689-140508821  
chr7:140481364-140481514  
chr7:140481364-140481514  
chr7:140453081-140453228  
chr7:140453081-140453228  
chr7:140453034-140453165  
chr7:140453034-140453165  
chr7:140487301-140487429  
chr7:140487301-140487429  
chr7:140453965-140454093  
chr7:140453965-140454093  
chr7:55225328-55225466  
chr7:55225328-55225466  
chr7:55242382-55242516  
chr7:55242382-55242516

TAACCTTTGTGCTTCTGGGC  
CTCACATGCTCTCATAAGTTCA  
CGGAGAAGAAACACTAAGTGC  
TGTCATGAGGCTGGATTCAA  
ATCGAATGGAACAGCCTGAG  
AGTTCTAGCAATGCTGGATACT  
CATTTTCCAGGCCCAAAAT  
AAGGGCTGTGGAATTGGAAT  
GTCATTACTGCTAGGTTTTAATGC  
TAGTTGCTACCCTGGGAAC  
ACACTTGGAGTAACAATGGCC  
TCCCACCTCCTAAAATAATCAAGA  
ACACTGGCAGTACTGTGATGT  
GTGCTCAGAATCTGTCTATGA  
TTTTTATGGTGGGACGAGGA  
GCACTCTGCCATTAATCTCT  
TGTGTTTTCAATGAGTGTGAAG  
CTCCTGAACCTCTCACTCA  
ATTCTCGCCTCTATTGAGCT  
ATGCACCTGCGGTGAATTTTT  
TGTAAGTGTGATGGGACTCT  
TCCGGAATGGCAGGGT  
TCTCCGCTCCCTTCC  
GCCGCTCTTCCAAAATAA  
GGCCAGGCTCTGTTCAA  
ACACACATCAGTGGAACTTCT  
GTAGATACGTCAGTTTCTAGAAAGT  
TGGAAGAAAACCTCACAGA  
GTTTCCGCTGTCAACATGT  
CACTGTCTCTGTTTGTGG  
TCTGGGGAACGGAAGTAT  
GAAGGTAGCACTGAAAGGCT  
GGACAAAGTCCGGATTGAAT  
TCCTGTATGACATGGATGCC  
CCCAAGTCACCACAAAACC  
ACATCCTCAATGGTCTTCAAAA  
ATTCCACAAAGCCACAACCTG  
ATGGTGATACAAGCTGGAGC  
ACCGACAGACTACTTTGGTT  
TGGAGCCTTGATATAGACGG  
TGTTCTAACAGGCCACAGAA  
GGTAACTGTCCAGTCATCAAT  
TGGTAAAAGCATTGCTCTAGGA  
ACCATTCGATTCTGCTCTTCT  
CATACTTGCTCCTCCTTAATGT  
TGGCTGTGACTTCTAAGAAGA  
AACCACAGGTTTGTCTGCTA  
CCAAGAGCAGAAGTCAAACC  
ATGAACTTCTGGGTTTTGC  
ACTCATCCATATTTACATTTCCCT  
CACTGTACTAGCCCTCGA  
TTCACGTCACATACAAAACA  
TGTAATTTGCTCCCTTTACCTC  
CTTGTCACAATGTCACCACA  
TCTGTTTGGCTTGACTTGAC  
AGCCTCAATTTTACCATCCA  
TGCTTGCTCTGATAGGAAAATG  
TAACCTCAGCAGCATCTCAGG  
TCTTCATGAAGACCTCACAGT  
AGGAAATAAGCAGCAAAGCA  
CAGTGTATCGCTACTCTCTGA  
CAGGATGTTTTCAAACTTCGC  
CACCCCAAGTATGTTCTGT  
AGAAACTCCTACGTGGTGTG  
GGCAAATGTAATCTACCAGGC  
GTGGCACCATCTCACAATTG  
CACACAGCAAAGCAGAAACT

|                    |                        |                        |
|--------------------|------------------------|------------------------|
| EGFR.7.1.EGFR.1_F  | chr7:55221703-55221855 | CGTGTCTCTCTCTCCATA     |
| EGFR.7.1.EGFR.1_R  | chr7:55221703-55221855 | AGTTAGAGGGCCACAGAG     |
| EGFR.26.1.EGFR.1_F | chr7:55267952-55268110 | GCCTTCTTTAAGCAATGCCA   |
| EGFR.26.1.EGFR.1_R | chr7:55267952-55268110 | GGAAGCACAGACTGCAATTT   |
| EGFR.17.1.EGFR.1_F | chr7:55238010-55238172 | CTTTCTCCAGGCCAGGAAAT   |
| EGFR.17.1.EGFR.1_R | chr7:55238010-55238172 | ATGGAGGTGGTGCATC       |
| EGFR.17.2.EGFR.2_F | chr7:55238168-55238323 | TCAGAGTTTCAGCTGGGTTG   |
| EGFR.17.2.EGFR.2_R | chr7:55238168-55238323 | AGTGGAAAGGAAGAAATGGG   |
| EGFR.17.2.EGFR.3_F | chr7:55237975-55238104 | CCAGGCCCTCACATATTGA    |
| EGFR.17.2.EGFR.3_R | chr7:55237975-55238104 | CTAAGCATGACTCCTGAGCA   |
| EGFR.2.1.EGFR.1_F  | chr7:55209989-55210133 | TTTCTTCCAGTTTGCCAAGG   |
| EGFR.2.1.EGFR.1_R  | chr7:55209989-55210133 | GTGTAGGAAAATCAAAGTCACC |
| EGFR.2.2.EGFR.2_F  | chr7:55209879-55210038 | TCTCTGTGTGGAGAGAGTGA   |
| EGFR.2.2.EGFR.2_R  | chr7:55209879-55210038 | ATTGAACATCCTCTGGAGGC   |
| EGFR.22.1.EGFR.1_F | chr7:55249005-55249165 | AAGCCTACGTGATGGCCA     |
| EGFR.22.1.EGFR.1_R | chr7:55249005-55249165 | CCTTCCCTGATTACCTTTGC   |
| EGFR.22.2.EGFR.2_F | chr7:55249120-55249254 | GACTATGTCCGGGAACACAA   |
| EGFR.22.2.EGFR.2_R | chr7:55249120-55249254 | ACACATATCCCCATGGCAAA   |
| EGFR.22.2.EGFR.3_F | chr7:55248915-55249064 | CATTTCATGCGTCTTCACTG   |
| EGFR.22.2.EGFR.3_R | chr7:55248915-55249064 | GCATGAGCTGCGTGATGA     |
| EGFR.1.4.EGFR.1_F  | chr7:55086948-55087164 | GTATTGATCGGGAGAGCCGG   |
| EGFR.1.4.EGFR.1_R  | chr7:55086948-55087164 | AGGAAACAGGAAAGGACCGG   |
| EGFR.18.1.EGFR.1_F | chr7:55238748-55238906 | CCAACATCCAGACACATAGTG  |
| EGFR.18.1.EGFR.1_R | chr7:55238748-55238906 | ACAGAGCTGTGAACACTTAC   |
| EGFR.30.1.EGFR.1_F | chr7:55272999-55273160 | GCTGGCTCTGTGCAGAAT     |
| EGFR.30.1.EGFR.1_R | chr7:55272999-55273160 | CCAGGCTAATTTGGTGGCT    |
| EGFR.30.2.EGFR.2_F | chr7:55272855-55273006 | GCTCCCTGTCAATAGTCTCC   |
| EGFR.30.2.EGFR.2_R | chr7:55272855-55273006 | GGTTCAGAGGCTGATTGTGA   |
| EGFR.30.2.EGFR.3_F | chr7:55273171-55273310 | AGAAAGGCAGCCACCAAA     |
| EGFR.30.2.EGFR.3_R | chr7:55273171-55273310 | GTCATACTATCCTCCGTGG    |
| EGFR.30.3.EGFR.4_F | chr7:55273102-55273243 | CCCCGAGTATCTCAACTG     |
| EGFR.30.3.EGFR.4_R | chr7:55273102-55273243 | CTGCATTTTCAGCTGTGGAG   |
| EGFR.23.1.EGFR.1_F | chr7:55259410-55259567 | AGCAGGGCTTCTCTGTTC     |
| EGFR.23.1.EGFR.1_R | chr7:55259410-55259567 | ACCTAAGCCACCTCCTTAC    |
| EGFR.13.1.EGFR.1_F | chr7:55229187-55229345 | CTGTGACCCACTCTGTCTC    |
| EGFR.13.1.EGFR.1_R | chr7:55229187-55229345 | TTTTTGATCAACGCAAGGGG   |
| EGFR.16.1.EGFR.1_F | chr7:55236086-55236244 | AGGTCCAGAAAGTGATTGGG   |
| EGFR.16.1.EGFR.1_R | chr7:55236086-55236244 | TGCAGTTTTAGTGGGAGACT   |
| EGFR.29.1.EGFR.1_F | chr7:55270210-55270373 | CCCTCATTTCTCTCTGCAG    |
| EGFR.29.1.EGFR.1_R | chr7:55270210-55270373 | ACTGGAGACTGGCTGCT      |
| EGFR.29.2.EGFR.2_F | chr7:55270310-55270459 | CATAGACGACACCTTCCTCC   |
| EGFR.29.2.EGFR.2_R | chr7:55270310-55270459 | TTTATCTGCTCCTTACGCC    |
| EGFR.27.1.EGFR.1_F | chr7:55268891-55269051 | GCACCAGGGGATGAAA       |
| EGFR.27.1.EGFR.1_R | chr7:55268891-55269051 | AGAGAGAGAGACAGAGATTTCA |
| EGFR.27.2.EGFR.2_F | chr7:55268790-55268930 | AAATTGGCAAACACACAGGC   |
| EGFR.27.2.EGFR.2_R | chr7:55268790-55268930 | CTTCTTCATCCATCAGGGCA   |
| EGFR.6.1.EGFR.1_F  | chr7:55220200-55220358 | CCTGGGAAATGATCCTACCC   |
| EGFR.6.1.EGFR.1_R  | chr7:55220200-55220358 | TGCTGGAGGGGCATCTTA     |
| EGFR.25.1.EGFR.1_F | chr7:55266396-55266557 | CCCCTGCCTTCTTTTCTTG    |
| EGFR.25.1.EGFR.1_R | chr7:55266396-55266557 | AGCCACCAGTCACTCA       |
| EGFR.28.1.EGFR.1_F | chr7:55269421-55269579 | TGGGCAACTTCTCTGTTTCT   |
| EGFR.28.1.EGFR.1_R | chr7:55269421-55269579 | ACCCACACAGGAAGAAAAT    |
| EGFR.3.1.EGFR.1_F  | chr7:55211038-55211198 | TTATGTCTCATTTGCCCTCA   |
| EGFR.3.1.EGFR.1_R  | chr7:55211038-55211198 | TTATGAACCCCCAGCCTTG    |
| EGFR.3.2.EGFR.2_F  | chr7:55210906-55211053 | CGTGTGCATTAGGGTTCAAC   |
| EGFR.3.2.EGFR.2_R  | chr7:55210906-55211053 | TCTGCAGGTTTTCCAAAGGA   |
| EGFR.9.1.EGFR.1_F  | chr7:55224211-55224356 | TGTGAACGGAATACACGTCT   |
| EGFR.9.1.EGFR.1_R  | chr7:55224211-55224356 | CAAGCAACTGAACCTGTGAC   |
| EGFR.12.1.EGFR.1_F | chr7:55227872-55228031 | TCGTACGCTGAACATAACA    |
| EGFR.12.1.EGFR.1_R | chr7:55227872-55228031 | AACAGAAAGCGGTGACTTAC   |
| EGFR.12.2.EGFR.2_F | chr7:55227723-55227877 | CACAGCATGACCTACCATCA   |
| EGFR.12.2.EGFR.2_R | chr7:55227723-55227877 | CCTTGAGGGAGCGTAATCC    |
| EGFR.15.1.EGFR.1_F | chr7:55232972-55233130 | TTTTTCTCCACCTTGGTGCA   |
| EGFR.15.1.EGFR.1_R | chr7:55232972-55233130 | TCCTCTCACTTTCCACTCAC   |
| EGFR.20.1.EGFR.1_F | chr7:55241601-55241736 | TGACCCTGTCTCTGTGTTC    |
| EGFR.20.1.EGFR.1_R | chr7:55241601-55241736 | TGTGCCAGGACCTTAC       |
| EGFR.14.1.EGFR.1_F | chr7:55231378-55231531 | GAGGTGATTTGTGTCTCTGC   |

|                    |                           |                           |
|--------------------|---------------------------|---------------------------|
| EGFR.14.1.EGFR.1_R | chr7:55231378-55231531    | TGAAATGGACGTGGATAGCA      |
| EGFR.8.1.EGFR.1_F  | chr7:55223523-55223668    | TTTCATGCTCTCTCCCCAG       |
| EGFR.8.1.EGFR.1_R  | chr7:55223523-55223668    | TCAGCAGCCGAGAACAAG        |
| EGFR.4.1.EGFR.1_F  | chr7:55214292-55214447    | CTCACCGCAGTTCATTCT        |
| EGFR.4.1.EGFR.1_R  | chr7:55214292-55214447    | CTGGAGGCAGAGATAGTGTG      |
| EGFR.24.1.EGFR.1_F | chr7:55260420-55260557    | ACTTTTTCCAACAGAGGGAAAC    |
| EGFR.24.1.EGFR.1_R | chr7:55260420-55260557    | TTGGCCTCAGTACAACTCA       |
| EGFR.10.1.EGFR.1_F | chr7:55224452-55224586    | TCACCCGTGTGTTGTTTCAG      |
| EGFR.10.1.EGFR.1_R | chr7:55224452-55224586    | AGGGAACAGGAAATATGTCGA     |
| EGFR.19.1.EGFR.1_F | chr7:55240695-55240853    | GCCTAAGATCCCGTCCATC       |
| EGFR.19.1.EGFR.1_R | chr7:55240695-55240853    | TTGTTCTGTCTGGGGTG         |
| EGFR.19.2.EGFR.2_F | chr7:55240594-55240747    | ACAAGATGTCAGTGCACTGA      |
| EGFR.19.2.EGFR.2_R | chr7:55240594-55240747    | TTCGCATGAAGAGGCCG         |
| EGFR.5.1.EGFR.1_F  | chr7:55218943-55219092    | GAAAGGGCGTCATCAGTTTC      |
| EGFR.5.1.EGFR.1_R  | chr7:55218943-55219092    | CAAGTGAAGGAAGAGAGGGG      |
| AKT1.6.3.AKT1.1_F  | chr14:105239742-105239901 | AAAGGTGGCCTCAGGTCA        |
| AKT1.6.3.AKT1.1_R  | chr14:105239742-105239901 | CAGCTGTTCTTCCACCTGT       |
| AKT1.6.4.AKT1.2_F  | chr14:105239834-105239985 | TTCTTCTCCGAGTGCAGGTA      |
| AKT1.6.4.AKT1.2_R  | chr14:105239834-105239985 | GAGACCCGGTCTGAGAAAC       |
| AKT1.11.5.AKT1.1_F | chr14:105242953-105243117 | TGTCCTCCTAAGCGCT          |
| AKT1.11.5.AKT1.1_R | chr14:105242953-105243117 | GCAGACAGAGGCTCTGC         |
| AKT1.3.1.AKT1.1_F  | chr14:105238666-105238799 | GAGTGTGGATATGTGGGGAG      |
| AKT1.3.1.AKT1.1_R  | chr14:105238666-105238799 | GACACTGTGGCCTTGTTC        |
| AKT1.7.1.AKT1.1_F  | chr14:105240168-105240321 | TCTGGTGCCATGGAGAGTA       |
| AKT1.7.1.AKT1.1_R  | chr14:105240168-105240321 | TTCCAGCTCCCCTTCCTT        |
| AKT1.9.3.AKT1.1_F  | chr14:105241362-105241516 | TAAAGCAGGGCTGGGTGA        |
| AKT1.9.3.AKT1.1_R  | chr14:105241362-105241516 | CGAGTTTGAGTACCTGAAGC      |
| AKT1.9.4.AKT1.2_F  | chr14:105241495-105241655 | CCTTACCAGGATCACCTTG       |
| AKT1.9.4.AKT1.2_R  | chr14:105241495-105241655 | CACCAGGTGTGAAGTGGAC       |
| AKT1.2.1.AKT1.1_F  | chr14:105237046-105237197 | CCTCTCTGAGTGTGGAGAGA      |
| AKT1.2.1.AKT1.1_R  | chr14:105237046-105237197 | CTCATGACTGTCCCGTCTG       |
| AKT1.12.1.AKT1.1_F | chr14:105246435-105246582 | GATACTTACGCGCCACAGA       |
| AKT1.12.1.AKT1.1_R | chr14:105246435-105246582 | GTCTGACGGGTAGAGTGTG       |
| AKT1.12.2.AKT1.2_F | chr14:105246407-105246543 | CCCAAATCTGAATCCCGAGA      |
| AKT1.12.2.AKT1.2_R | chr14:105246407-105246543 | ACGTCTGTAGGGGAGTACAT      |
| AKT1.8.1.AKT1.1_F  | chr14:105241206-105241343 | CCAAGAAGACAGGACATCGT      |
| AKT1.8.1.AKT1.1_R  | chr14:105241206-105241343 | TCACCCAGCCCTGCTTTA        |
| AKT1.4.1.AKT1.1_F  | chr14:105239235-105239399 | CTGCTTGGGGTCTTCTT         |
| AKT1.4.1.AKT1.1_R  | chr14:105239235-105239399 | ATGACTACGGCCCTGCA         |
| AKT1.4.2.AKT1.2_F  | chr14:105239380-105239509 | TCATCTCGTACATGACCACG      |
| AKT1.4.2.AKT1.2_R  | chr14:105239380-105239509 | AATGCTGTGTCTCTCTGTG       |
| AKT1.4.2.AKT1.3_F  | chr14:105239188-105239318 | ATGAGGGGATGGAGGTGTAG      |
| AKT1.4.2.AKT1.3_R  | chr14:105239188-105239318 | ACAACCAGGACCATGAGAAG      |
| AKT1.1.1.AKT1.1_F  | chr14:105236629-105236760 | ATACAGATCATGGCACGAGG      |
| AKT1.1.1.AKT1.1_R  | chr14:105236629-105236760 | TCTGAGCTGTCTACACCCA       |
| AKT1.10.1.AKT1.1_F | chr14:105242029-105242165 | CAGGGACACCTCCATCTCT       |
| AKT1.10.1.AKT1.1_R | chr14:105242029-105242165 | GGAGTCTCTGATCTGGTACA      |
| AKT1.10.2.AKT1.2_F | chr14:105241904-105242063 | GAGTGTGAGTGTCTCTCTG       |
| AKT1.10.2.AKT1.2_R | chr14:105241904-105242063 | AGGAGGAGGAGATGGACTTC      |
| AKT1.13.1.AKT1.1_F | chr14:105258935-105259068 | TGGCAGCGGGTACTAAC         |
| AKT1.13.1.AKT1.1_R | chr14:105258935-105259068 | TCACATTCAGTTCCTTTGC       |
| AKT1.5.1.AKT1.1_F  | chr14:105239571-105239723 | CAGCAACGCGTATGCAC         |
| AKT1.5.1.AKT1.1_R  | chr14:105239571-105239723 | TGACCTGAGGCCACCTTT        |
| MSH2.11.5.MSH2.1_F | chr2:47698066-47698223    | ACACATGCTTCTAGTACACAT     |
| MSH2.11.5.MSH2.1_R | chr2:47698066-47698223    | GCCAGGTGACATTCAGAACA      |
| MSH2.7.1.MSH2.1_F  | chr2:47656971-47657131    | TCGATTTCCAGATCTTAACCG     |
| MSH2.7.1.MSH2.1_R  | chr2:47656971-47657131    | AGGACAGCACATTGCCAA        |
| MSH2.7.2.MSH2.2_F  | chr2:47656825-47656981    | TGAGACTTACGTGCTTAGTTGA    |
| MSH2.7.2.MSH2.2_R  | chr2:47656825-47656981    | TGCTGCTTGTCTTTGAAACT      |
| MSH2.2.3.MSH2.1_F  | chr2:47635498-47635655    | CAGCTAATACAGTCTTGAACA     |
| MSH2.2.3.MSH2.1_R  | chr2:47635498-47635655    | TCATTTCTCTGGATGCCTT       |
| MSH2.2.10.MSH2.2_F | chr2:47635633-47635784    | GGTTCGTCAATATAGAGTTGAAG   |
| MSH2.2.10.MSH2.2_R | chr2:47635633-47635784    | CTCAAACCATCTACTATCACAAATC |
| MSH2.17.1.MSH2.1_F | chr2:47739417-47739566    | CCCGTGGAACTCCTACATTT      |
| MSH2.17.1.MSH2.1_R | chr2:47739417-47739566    | AACAGACACCAGGTCATGAG      |
| MSH2.1.1.MSH2.1_F  | chr2:47630331-47630491    | GAGGTGAGGAGGTTTCGAC       |
| MSH2.1.1.MSH2.1_R  | chr2:47630331-47630491    | TCTTGAACACCTCCCGG         |



|                     |                        |                            |
|---------------------|------------------------|----------------------------|
| MSH2.1.2.MSH2.2_F   | chr2:47630461-47630598 | GACCGGGGCGACTTCTATA        |
| MSH2.1.2.MSH2.2_R   | chr2:47630461-47630598 | ACTCTCTGAGGCGGGAAA         |
| MSH2.18.5.MSH2.1_F  | chr2:47888122-47888263 | TTTTGAGACAAGGTGTCATTCT     |
| MSH2.18.5.MSH2.1_R  | chr2:47888122-47888263 | TCATTTGACAATTTCCFCCA       |
| MSH2.18.6.MSH2.2_F  | chr2:47887997-47888134 | GTTAGGCCCTGGAAATCTT        |
| MSH2.18.6.MSH2.2_R  | chr2:47887997-47888134 | AGATCGTGGCATTGCACTC        |
| MSH2.13.1.MSH2.1_F  | chr2:47703555-47703714 | ATTCGCACAACTGGGGTGAT       |
| MSH2.13.1.MSH2.1_R  | chr2:47703555-47703714 | CAAGGGACTAGGAGATGCAC       |
| MSH2.13.2.MSH2.2_F  | chr2:47703412-47703570 | GTCAGTGTAACCTACGCGA        |
| MSH2.13.2.MSH2.2_R  | chr2:47703412-47703570 | CATGGCACAAAACACCCAAT       |
| MSH2.16.1.MSH2.1_F  | chr2:47709957-47710092 | GGAGTTCCTGTCCAAGGTG        |
| MSH2.16.1.MSH2.1_R  | chr2:47709957-47710092 | ACCTTCATTCCATTACTGGGA      |
| MSH2.16.10.MSH2.2_F | chr2:47709871-47710012 | TGTCACGTCTAACATGACTTT      |
| MSH2.16.10.MSH2.2_R | chr2:47709871-47710012 | CTTTGCTATTACTTCAGCTTTAGC   |
| MSH2.6.1.MSH2.1_F   | chr2:47643454-47643606 | AGGGTTCTGTTGAAGATACCA      |
| MSH2.6.1.MSH2.1_R   | chr2:47643454-47643606 | ATCATGTGGGTAACCTGCAGG      |
| MSH2.6.2.MSH2.2_F   | chr2:47643378-47643521 | TCCTCTGTTTTTTCATGGCGT      |
| MSH2.6.2.MSH2.2_R   | chr2:47643378-47643521 | AGAGGCTGCTTAATCCACTG       |
| MSH2.3.1.MSH2.1_F   | chr2:47637312-47637473 | GCTTCCATTGGTGTGTGG         |
| MSH2.3.1.MSH2.1_R   | chr2:47637312-47637473 | TCTCCAGCAGTCTCTCCTC        |
| MSH2.3.2.MSH2.2_F   | chr2:47637406-47637540 | GGACTGTGTGAATTCCTGGA       |
| MSH2.3.2.MSH2.2_R   | chr2:47637406-47637540 | CCTTTCCTAGGCCTGGAATC       |
| MSH2.3.11.MSH2.3_F  | chr2:47637164-47637316 | GGTTCATAGAGTTTGGATTTTTCC   |
| MSH2.3.11.MSH2.3_R  | chr2:47637164-47637316 | CCATCAACTGCGGACATTTT       |
| MSH2.9.1.MSH2.1_F   | chr2:47690170-47690301 | GTCACCTTGTCTGTTTGCAG       |
| MSH2.9.1.MSH2.1_R   | chr2:47690170-47690301 | ATTCCAACCTCCAATGACCC       |
| MSH2.12.1.MSH2.1_F  | chr2:47702254-47702412 | GTGTCAAATGGAGCACCTG        |
| MSH2.12.1.MSH2.1_R  | chr2:47702254-47702412 | AGCCCCAAAACCAGGTTTTT       |
| MSH2.12.9.MSH2.2_F  | chr2:47702105-47702255 | GGGGGATTAATGTATTTTTACGGC   |
| MSH2.12.9.MSH2.2_R  | chr2:47702105-47702255 | ATGGCTGGTCGTACATATGG       |
| MSH2.15.3.MSH2.1_F  | chr2:47707832-47707990 | ACGCTTCCCCAAATTTCTTA       |
| MSH2.15.3.MSH2.1_R  | chr2:47707832-47707990 | CCTCTCTTCCAGATAGCACT       |
| MSH2.15.4.MSH2.2_F  | chr2:47707930-47708061 | AACAGAAAGCCCTGGAACCT       |
| MSH2.15.4.MSH2.2_R  | chr2:47707930-47708061 | ACCTTCATCTTAGTGTCTCTGT     |
| MSH2.14.5.MSH2.1_F  | chr2:47705535-47705684 | ACAAAGATTGGTGCTTTTTGC      |
| MSH2.14.5.MSH2.1_R  | chr2:47705535-47705684 | GTTTCCCATACCAAGTTCTGA      |
| MSH2.14.6.MSH2.2_F  | chr2:47705419-47705565 | TATGTGCTTCAGGCTGCAA        |
| MSH2.14.6.MSH2.2_R  | chr2:47705419-47705565 | TGGTATCTGATTGGCCAAGG       |
| MSH2.14.7.MSH2.3_F  | chr2:47705329-47705469 | TTGTGGCATATCCTTCCCAA       |
| MSH2.14.7.MSH2.3_R  | chr2:47705329-47705469 | TGCTAACCCAAATCCATCGT       |
| MSH2.8.12.MSH2.1_F  | chr2:47672697-47672839 | ACTACTTCTTTTAGGAAAACACCA   |
| MSH2.8.12.MSH2.1_R  | chr2:47672697-47672839 | TCTTAAAGTGGCCTTTGCTT       |
| MSH2.8.13.MSH2.2_F  | chr2:47672576-47672708 | ACTTTGGAGACCTGCTGTAC       |
| MSH2.8.13.MSH2.2_R  | chr2:47672576-47672708 | GAGGAGTCACAAAACCTGCC       |
| MSH2.4.14.MSH2.1_F  | chr2:47639583-47639812 | TCAAAGAGGAGGAATTCGTACACA   |
| MSH2.4.14.MSH2.1_R  | chr2:47639583-47639812 | TCATTGATACACAGTTTAGGTTTTGA |
| MSH2.4.15.MSH2.2_F  | chr2:47639437-47639593 | ATCAGTGTCTTGACATTGT        |
| MSH2.4.15.MSH2.2_R  | chr2:47639437-47639593 | GTCTTTTGTGGAAAAGTCAGCT     |
| MSH2.19.1.MSH2.1_F  | chr2:47905291-47905440 | TGTCACTTTGAAGGAGGCAA       |
| MSH2.19.1.MSH2.1_R  | chr2:47905291-47905440 | TTGTGAGCTTGGCTATGTGA       |
| MSH2.10.5.MSH2.1_F  | chr2:47693846-47693994 | GATTCCAGTGCACAGTTTGG       |
| MSH2.10.5.MSH2.1_R  | chr2:47693846-47693994 | ACATTCACATCATGTTAGAGCA     |
| MSH2.5.8.MSH2.1_F   | chr2:47641383-47641537 | CTGGATCCAGTGGTATAGAAATCT   |
| MSH2.5.8.MSH2.1_R   | chr2:47641383-47641537 | CCTGAAAAGGTTAAGGGCTC       |
| MSH2.5.10.MSH2.2_F  | chr2:47641487-47641631 | TCCAACCTTTGGACAGTTTGAAC    |
| MSH2.5.10.MSH2.2_R  | chr2:47641487-47641631 | GCTCCTTTATAAGCTTCTCAGT     |
| JAK2.11.1.JAK2.1_F  | chr9:5072508-5072660   | GAAGAATGAAAAGCCTTGCC       |
| JAK2.11.1.JAK2.1_R  | chr9:5072508-5072660   | GAGAGCACATCTTTAAACAGCA     |
| JAK2.11.2.JAK2.2_F  | chr9:5072453-5072605   | TGTTCTACTTCTGTTCTCCA       |
| JAK2.11.2.JAK2.2_R  | chr9:5072453-5072605   | CCTCTGAATAGTTTCTGTGTGC     |
| JAK2.21.3.JAK2.1_F  | chr9:5122961-5123118   | GCAGGTAATAACAGAGTCCAC      |
| JAK2.21.3.JAK2.1_R  | chr9:5122961-5123118   | ATAAAAAGCACACTGACCCG       |
| JAK2.21.4.JAK2.2_F  | chr9:5123074-5123222   | TTTGGAGCTTTGGAGTGGTT       |
| JAK2.21.4.JAK2.2_R  | chr9:5123074-5123222   | AAAGCTCTGACTTCACCACT       |
| JAK2.7.3.JAK2.1_F   | chr9:5064857-5065012   | GAGTTGACTTCTAAAAGGTGC      |
| JAK2.7.3.JAK2.1_R   | chr9:5064857-5065012   | GCCATGACAGTTGCTTTGTA       |
| JAK2.7.5.JAK2.2_F   | chr9:5065000-5065159   | GAAGTAGCACCTCCAGCC         |

|                     |                      |                            |
|---------------------|----------------------|----------------------------|
| JAK2.7.5.JAK2.2_R   | chr9:5065000-5065159 | CTGATTGCAAATAGCCTTTTGT     |
| JAK2.17.7.JAK2.1_F  | chr9:5081692-5081844 | AGTCCAGAGAATGTTATTTGCT     |
| JAK2.17.7.JAK2.1_R  | chr9:5081692-5081844 | TACCTTGCCAAGTTGCTGTA       |
| JAK2.17.8.JAK2.2_F  | chr9:5081825-5081980 | CGGGATCCTACACAGTTTGA       |
| JAK2.17.8.JAK2.2_R  | chr9:5081825-5081980 | TCTCCAACATCTGACAACCA       |
| JAK2.2.5.JAK2.1_F   | chr9:5029781-5029936 | TTCCCTTCTCTGCTTCTTTTCT     |
| JAK2.2.5.JAK2.1_R   | chr9:5029781-5029936 | CTCCCATTTTGCCTTTTAGCA      |
| JAK2.22.5.JAK2.1_F  | chr9:5126335-5126464 | TGAAAGTGGGTTTGTTTTAGGA     |
| JAK2.22.5.JAK2.1_R  | chr9:5126335-5126464 | AAATGCATGACTACCCTGGA       |
| JAK2.22.6.JAK2.2_F  | chr9:5126271-5126417 | TTCCCATTGACTGGAGGAAA       |
| JAK2.22.6.JAK2.2_R  | chr9:5126271-5126417 | GCATCCATCTGGTCTTGGA        |
| JAK2.1.1.JAK2.1_F   | chr9:5021998-5022157 | AAGACTCTGCATGGGAATGG       |
| JAK2.1.1.JAK2.1_R   | chr9:5021998-5022157 | CAACATACTCCCAGATGGA        |
| JAK2.1.2.JAK2.2_F   | chr9:5022155-5022311 | AATCTGAGGCAGATTATCTGAC     |
| JAK2.1.2.JAK2.2_R   | chr9:5022155-5022311 | GCCAGCCATACAAGCATTA        |
| JAK2.1.2.JAK2.3_F   | chr9:5021861-5022020 | GAGGCTTGTCTCCAACCTCT       |
| JAK2.1.2.JAK2.3_R   | chr9:5021861-5022020 | GAAGAGGTGGATGTTCCCTC       |
| JAK2.18.1.JAK2.1_F  | chr9:5089711-5089866 | GAGATGTGCCGGTATGACC        |
| JAK2.18.1.JAK2.1_R  | chr9:5089711-5089866 | ATAGGTTTCAATGGGCAGCT       |
| JAK2.18.2.JAK2.2_F  | chr9:5089587-5089729 | ACAGTCTGCTAATTCCAGCT       |
| JAK2.18.2.JAK2.2_R  | chr9:5089587-5089729 | TTTTTACAGCGACCACCTCC       |
| JAK2.13.16.JAK2.1_F | chr9:5077471-5077680 | TGCAGATATTCTGGTTCAGGAGT    |
| JAK2.13.16.JAK2.1_R | chr9:5077471-5077680 | ACACAGACTATTTACATGAATTGGCA |
| JAK2.13.17.JAK2.2_F | chr9:5077380-5077532 | ACCTATAATGGTCACATGTAAGTAT  |
| JAK2.13.17.JAK2.2_R | chr9:5077380-5077532 | GTTTAGCAACTTCAAGTTTCCA     |
| JAK2.16.3.JAK2.1_F  | chr9:5080496-5080643 | AGAAGGTTGGTGTGGCATT        |
| JAK2.16.3.JAK2.1_R  | chr9:5080496-5080643 | AGATCTCGTATGATGGCTCT       |
| JAK2.16.4.JAK2.2_F  | chr9:5080639-5080782 | TGAACCAGATTTCAGGCCTT       |
| JAK2.16.4.JAK2.2_R  | chr9:5080639-5080782 | TTAAGAGGGCCCAATGACA        |
| JAK2.23.1.JAK2.1_F  | chr9:5126654-5126797 | AAGATGGCCCTTAGTGTCA        |
| JAK2.23.1.JAK2.1_R  | chr9:5126654-5126797 | TGGTCTCAGAATGAAGGTCA       |
| JAK2.6.7.JAK2.1_F   | chr9:5055641-5055768 | GGCTCTGTAATAATCTACCCGT     |
| JAK2.6.7.JAK2.1_R   | chr9:5055641-5055768 | ACCAGATTTTACCATCTTGCT      |
| JAK2.6.11.JAK2.2_F  | chr9:5055754-5055907 | GGGTTCAAATGAAGCCGAG        |
| JAK2.6.11.JAK2.2_R  | chr9:5055754-5055907 | AGTTTACTGAACTGATGTTAGAGT   |
| JAK2.3.16.JAK2.1_F  | chr9:5044382-5044633 | TGAACTATTTGGAGCTGACCA      |
| JAK2.3.16.JAK2.1_R  | chr9:5044382-5044633 | ACTTCTCTGCACCTGCTGTG       |
| JAK2.9.1.JAK2.1_F   | chr9:5069092-5069246 | AATGAAGAGTACAACCTCAGTG     |
| JAK2.9.1.JAK2.1_R   | chr9:5069092-5069246 | CACGCCACATAAACAATCCA       |
| JAK2.9.2.JAK2.2_F   | chr9:5068997-5069139 | CCATTGTGACTATCCCTCCC       |
| JAK2.9.2.JAK2.2_R   | chr9:5068997-5069139 | TGAGCGAACAGTTTCCATCT       |
| JAK2.12.1.JAK2.1_F  | chr9:5073671-5073811 | TGGACAACAGTCAAACAACA       |
| JAK2.12.1.JAK2.1_R  | chr9:5073671-5073811 | ACAGATGCTCTGAGAAAGGC       |
| JAK2.14.1.JAK2.1_F  | chr9:5078335-5078492 | ACACCCTTATTTCATGGGAATG     |
| JAK2.14.1.JAK2.1_R  | chr9:5078335-5078492 | AACATGCCCTTTACACCACT       |
| JAK2.14.2.JAK2.2_F  | chr9:5078271-5078425 | ATGCTCCAGTACTTGTGGAC       |
| JAK2.14.2.JAK2.2_R  | chr9:5078271-5078425 | CTGCTCCTTTGGCAAACTGT       |
| JAK2.15.3.JAK2.1_F  | chr9:5080221-5080361 | AACCTACTCTGTTCGTATCA       |
| JAK2.15.3.JAK2.1_R  | chr9:5080221-5080361 | ACTCTTTGAGAAATCCAGAGCA     |
| JAK2.15.4.JAK2.2_F  | chr9:5080339-5080475 | CCACTTTGTGGAAATCTGC        |
| JAK2.15.4.JAK2.2_R  | chr9:5080339-5080475 | TAATGCCACACCACCTTCT        |
| JAK2.20.5.JAK2.1_F  | chr9:5090787-5090944 | ATATCCACAGGGATCTGGCA       |
| JAK2.20.5.JAK2.1_R  | chr9:5090787-5090944 | AAAGTTTGAAGTCTGTGCTCT      |
| JAK2.20.10.JAK2.2_F | chr9:5090685-5090837 | AGGGAATATATAGGGTTAAGACCA   |
| JAK2.20.10.JAK2.2_R | chr9:5090685-5090837 | GGCAAGACTTTGGTTAACCC       |
| JAK2.8.10.JAK2.1_F  | chr9:5066641-5066789 | CACTTGGTCATAATATTATGGTGCT  |
| JAK2.8.10.JAK2.1_R  | chr9:5066641-5066789 | CCACTAATAAGTGTGACATACTAAC  |
| JAK2.4.11.JAK2.1_F  | chr9:5050693-5050836 | TTTTTGGTTTTAGTGGCGGC       |
| JAK2.4.11.JAK2.1_R  | chr9:5050693-5050836 | TGTGTAAGGATTTGCAAAAAGAAA   |
| JAK2.4.12.JAK2.2_F  | chr9:5050582-5050723 | AGCCTGGCCAATTTGTATCT       |
| JAK2.4.12.JAK2.2_R  | chr9:5050582-5050723 | TCCTGTGTTTCATGAGTCACA      |
| JAK2.10.16.JAK2.1_F | chr9:5069889-5070112 | TGGAGCAATTCATACTTTCAGTGT   |
| JAK2.10.16.JAK2.1_R | chr9:5069889-5070112 | TCCAATGTCACATGAATGTAATCA   |
| JAK2.19.1.JAK2.1_F  | chr9:5090456-5090594 | ATGTTAAAAGGTCGGCGTAA       |
| JAK2.19.1.JAK2.1_R  | chr9:5090456-5090594 | ACACGGTTGCTTCATCTACA       |
| JAK2.19.9.JAK2.2_F  | chr9:5090433-5090581 | GGCAGAGTAAAACATTATTTCCACC  |
| JAK2.19.9.JAK2.2_R  | chr9:5090433-5090581 | GCTTCATCTACAGCAAATAATCAGG  |

|                         |                          |                            |
|-------------------------|--------------------------|----------------------------|
| JAK2.5.13.JAK2.1_F      | chr9:5054550-5054685     | TGTTTTGTTTTTCTGTATGTGCT    |
| JAK2.5.13.JAK2.1_R      | chr9:5054550-5054685     | ACTTAAGTTTCAAGTTTCTGGCA    |
| JAK2.5.14.JAK2.2_F      | chr9:5054681-5054835     | AGCAATTCAGCCAAATGCAAA      |
| JAK2.5.14.JAK2.2_R      | chr9:5054681-5054835     | GTTTCCTCTTGACCACTGA        |
| JAK2.5.15.JAK2.3_F      | chr9:5054811-5054967     | GTGAGGAGATTTTTGCAACCA      |
| JAK2.5.15.JAK2.3_R      | chr9:5054811-5054967     | TGGGAGAAGTGCAATACCAT       |
| PIK3R1.11.6.PIK3R1.1_F  | chr5:67589187-67589340   | TCGAGATGGGAAATATGGCT       |
| PIK3R1.11.6.PIK3R1.1_R  | chr5:67589187-67589340   | AAGGATCTTGTCTAAACATCGT     |
| PIK3R1.11.7.PIK3R1.2_F  | chr5:67589041-67589200   | CACTAAGGTAAGCCAGGGAA       |
| PIK3R1.11.7.PIK3R1.2_R  | chr5:67589041-67589200   | TCAACCACAGAACTGAAGGT       |
| PIK3R1.7.1.PIK3R1.1_F   | chr5:67584507-67584642   | ACTTGGTGGAGAAGACAGCTT      |
| PIK3R1.7.1.PIK3R1.1_R   | chr5:67584507-67584642   | ACACACACGTACTCCAAGAC       |
| PIK3R1.2.1.PIK3R1.1_F   | chr5:67569163-67569310   | TGTACGTCCATCATGTGGT        |
| PIK3R1.2.1.PIK3R1.1_R   | chr5:67569163-67569310   | CCCTCTAGCAGTCTGGTTAC       |
| PIK3R1.17.1.PIK3R1.1_F  | chr5:67593247-67593409   | CTCTCCTCTTAGGGTGGAC        |
| PIK3R1.17.1.PIK3R1.1_R  | chr5:67593247-67593409   | TCGCCTCTGTGTGCAT           |
| PIK3R1.17.2.PIK3R1.2_F  | chr5:67593363-67593509   | CATTACCAACACACCTCCCT       |
| PIK3R1.17.2.PIK3R1.2_R  | chr5:67593363-67593509   | TCTGCAGCTCAATTCACAGA       |
| PIK3R1.17.3.PIK3R1.3_F  | chr5:67593194-67593342   | TGCCCTGAAGAGTTGTGAAT       |
| PIK3R1.17.3.PIK3R1.3_R  | chr5:67593194-67593342   | AGGGAGGTGTGTTGGTAATG       |
| PIK3R1.1.1.PIK3R1.1_F   | chr5:67522522-67522683   | CATGAGTGTGAGGGGTAC         |
| PIK3R1.1.1.PIK3R1.1_R   | chr5:67522522-67522683   | CCCTTTCCCTGTGGTTTC         |
| PIK3R1.1.2.PIK3R1.2_F   | chr5:67522496-67522626   | ACTGTTGCATGGTAGCAGAT       |
| PIK3R1.1.2.PIK3R1.2_R   | chr5:67522496-67522626   | GCTTCCTGTCCATCACTGAA       |
| PIK3R1.1.2.PIK3R1.3_F   | chr5:67522702-67522852   | ATGAAACCACAGGGGAAAGG       |
| PIK3R1.1.2.PIK3R1.3_R   | chr5:67522702-67522852   | AGGGAGTCATTAGCAACCA        |
| PIK3R1.1.3.PIK3R1.4_F   | chr5:67522643-67522794   | TGGATTTCAGTGATGGACAGG      |
| PIK3R1.1.3.PIK3R1.4_R   | chr5:67522643-67522794   | GTTTTCGAAGAACCCTGGTGC      |
| PIK3R1.13.1.PIK3R1.1_F  | chr5:67590382-67590511   | GCAGAAATCCAATGAAAAGG       |
| PIK3R1.13.1.PIK3R1.1_R  | chr5:67590382-67590511   | GCACAAGAACAAGGGAAACA       |
| PIK3R1.13.2.PIK3R1.2_F  | chr5:67590308-67590440   | ATGTCTGGTAGTGTCTTGC        |
| PIK3R1.13.2.PIK3R1.2_R  | chr5:67590308-67590440   | ATTCCTTGTGTACCCGCTCT       |
| PIK3R1.16.1.PIK3R1.1_F  | chr5:67592069-67592227   | AGACATGGAATGTTGGAAGC       |
| PIK3R1.16.1.PIK3R1.1_R  | chr5:67592069-67592227   | CCCCAAAACCTCAATGAATGA      |
| PIK3R1.16.2.PIK3R1.2_F  | chr5:67591940-67592080   | GTATGCCTAGGGAAGACAGC       |
| PIK3R1.16.2.PIK3R1.2_R  | chr5:67591940-67592080   | CGCAACAGGTTTTTCAGCTTT      |
| PIK3R1.6.9.PIK3R1.1_F   | chr5:67576745-67576893   | GGGAAAAGGTTTTCTAATAAACTCTC |
| PIK3R1.6.9.PIK3R1.1_R   | chr5:67576745-67576893   | TCAAAGGAGGTTTATAGCCATCA    |
| PIK3R1.3.1.PIK3R1.1_F   | chr5:67569731-67569877   | GTTCCTCCAGAGAGCTGTGT       |
| PIK3R1.3.1.PIK3R1.1_R   | chr5:67569731-67569877   | AACAGAAAGCCAAGACCTGT       |
| PIK3R1.9.1.PIK3R1.1_F   | chr5:67588073-67588231   | GGGATTGCGAACAACCTTTTTC     |
| PIK3R1.9.1.PIK3R1.1_R   | chr5:67588073-67588231   | AGCTGGTGCTTTTCTTTCTT       |
| PIK3R1.12.10.PIK3R1.1_F | chr5:67589491-67589740   | TGTCAGCTATTTTGTAAACAATTGTT |
| PIK3R1.12.10.PIK3R1.1_R | chr5:67589491-67589740   | CCTCATTCGTAAAAACCTCAACCT   |
| PIK3R1.14.4.PIK3R1.1_F  | chr5:67590976-67591132   | TACGTTTCTTTTGCCTGCAG       |
| PIK3R1.14.4.PIK3R1.1_R  | chr5:67590976-67591132   | ACATCAAGTATTTGCTCTCTCGT    |
| PIK3R1.14.5.PIK3R1.2_F  | chr5:67591129-67591268   | CCAGACCTTATCCAGCTGAG       |
| PIK3R1.14.5.PIK3R1.2_R  | chr5:67591129-67591268   | CGTTCAACTTCTTTTGCCTGA      |
| PIK3R1.15.8.PIK3R1.1_F  | chr5:67591210-67591334   | TGGTGATTGCTACAATTCAGG      |
| PIK3R1.15.8.PIK3R1.1_R  | chr5:67591210-67591334   | GAGAAAAATCTTCTGCTATCACCA   |
| PIK3R1.8.1.PIK3R1.1_F   | chr5:67586543-67586684   | ATAACTGAGCTCAGCCAAGG       |
| PIK3R1.8.1.PIK3R1.1_R   | chr5:67586543-67586684   | GCCACGAAATTAACCTAATCTC     |
| PIK3R1.4.1.PIK3R1.1_F   | chr5:67575443-67575597   | TTCTTAGATACACCTCCGT        |
| PIK3R1.4.1.PIK3R1.1_R   | chr5:67575443-67575597   | GCACCTTACATCTCCATGT        |
| PIK3R1.4.2.PIK3R1.2_F   | chr5:67575380-67575524   | GTTTCAGAAAATTAGCCCACTG     |
| PIK3R1.4.2.PIK3R1.2_R   | chr5:67575380-67575524   | ATTTCACTGTAAACGGGTGC       |
| PIK3R1.10.1.PIK3R1.1_F  | chr5:67588900-67589029   | TCTGTGGTCACTAAACCTTAAG     |
| PIK3R1.10.1.PIK3R1.1_R  | chr5:67588900-67589029   | TCAGCTATATTCCTGGCTT        |
| PIK3R1.5.1.PIK3R1.1_F   | chr5:67576386-67576545   | AGCTCCGAGAATATATTCAGC      |
| PIK3R1.5.1.PIK3R1.1_R   | chr5:67576386-67576545   | ACTTACCTGGCTGCTGAG         |
| PIK3R1.5.2.PIK3R1.2_F   | chr5:67576489-67576642   | CTCTCTCAAACCTCCAGCAA       |
| PIK3R1.5.2.PIK3R1.2_R   | chr5:67576489-67576642   | GCACATGCATCTCTGGAGTA       |
| PIK3R1.5.2.PIK3R1.3_F   | chr5:67576236-67576395   | TACTGTGTGCTTCTCCCAAC       |
| PIK3R1.5.2.PIK3R1.3_R   | chr5:67576236-67576395   | TGCTAGGCGACCTAATAAGC       |
| NOTCH1.33.1.NOTCH1.1_F  | chr9:139438406-139438565 | AATGGCCTAGTGTCTGTCC        |
| NOTCH1.33.1.NOTCH1.1_R  | chr9:139438406-139438565 | GACTGACCTCTCTCTCCTG        |
| NOTCH1.32.1.NOTCH1.1_F  | chr9:139418278-139418440 | TTGTCCAGGGGTGTCAG          |

|                         |                          |                       |
|-------------------------|--------------------------|-----------------------|
| NOTCH1.32.1.NOTCH1.1_R  | chr9:139418278-139418440 | CTAACTGCCCTGGCACATC   |
| NOTCH1.32.10.NOTCH1.2_F | chr9:139418162-139418305 | CTCAGGCTGTGGGTCCCT    |
| NOTCH1.32.10.NOTCH1.2_R | chr9:139418162-139418305 | CAGACTATGCCTGCAGCTG   |
| NOTCH1.21.1.NOTCH1.1_F  | chr9:139407835-139408000 | CACTGAGAAAACGGCGAG    |
| NOTCH1.21.1.NOTCH1.1_R  | chr9:139407835-139408000 | TCGACCTGCAGTGTGGT     |
| NOTCH1.7.10.NOTCH1.1_F  | chr9:139396730-139396893 | CGTCCGCTCACTTGAGG     |
| NOTCH1.7.10.NOTCH1.1_R  | chr9:139396730-139396893 | GCAGCTGCACCTCATGTAC   |
| NOTCH1.7.11.NOTCH1.2_F  | chr9:139396883-139397044 | GAACAGAAGCACAAAGGCG   |
| NOTCH1.7.11.NOTCH1.2_R  | chr9:139396883-139397044 | ATGGAGGAGAGTGGGTGAG   |
| NOTCH1.7.11.NOTCH1.3_F  | chr9:139396600-139396761 | TAGGAAGCCCCAGAGA      |
| NOTCH1.7.11.NOTCH1.3_R  | chr9:139396600-139396761 | TGAGGCCAGCAAGAAGAAG   |
| NOTCH1.26.13.NOTCH1.1_F | chr9:139411686-139411843 | TCAGGAGGCCAGGGTG      |
| NOTCH1.26.13.NOTCH1.1_R | chr9:139411686-139411843 | CTCACTGTTGCCCCACC     |
| NOTCH1.2.1.NOTCH1.1_F   | chr9:139393304-139393448 | TTGGCCCTCACTTCTCTG    |
| NOTCH1.2.1.NOTCH1.1_R   | chr9:139393304-139393448 | CATCTGCTTCTTTCACGCAG  |
| NOTCH1.17.1.NOTCH1.1_F  | chr9:139404201-139404364 | CACCTCTCTGTGCAGTCAG   |
| NOTCH1.17.1.NOTCH1.1_R  | chr9:139404201-139404364 | GGCATCAACACGGCCTT     |
| NOTCH1.17.2.NOTCH1.2_F  | chr9:139404339-139404499 | GTCCCTCCTCACAGAAAGTGC |
| NOTCH1.17.2.NOTCH1.2_R  | chr9:139404339-139404499 | AACGAAAGGCTGGGCTG     |
| NOTCH1.17.2.NOTCH1.3_F  | chr9:139404047-139404205 | ACAGGTCGGTACAATGAACA  |
| NOTCH1.17.2.NOTCH1.3_R  | chr9:139404047-139404205 | GGGATCCACTGTGAGAACAA  |
| NOTCH1.1.1.NOTCH1.1_F   | chr9:139390541-139390703 | TTTACTTGAAGGCCTCCGG   |
| NOTCH1.1.1.NOTCH1.1_R   | chr9:139390541-139390703 | TCCTCGCCTGTGGACAA     |
| NOTCH1.1.2.NOTCH1.2_F   | chr9:139390447-139390595 | TAAAAAGGCTCCTCTGGTCG  |
| NOTCH1.1.2.NOTCH1.2_R   | chr9:139390447-139390595 | ATTCCAACGTCTCCGACTG   |
| NOTCH1.1.2.NOTCH1.3_F   | chr9:139390984-139391148 | CAGGCTTTGCTGCTGCT     |
| NOTCH1.1.2.NOTCH1.3_R   | chr9:139390984-139391148 | TGCAGCATGGCATGGTAG    |
| NOTCH1.1.3.NOTCH1.4_F   | chr9:139390829-139390983 | CTCTCCTGGGGCAGAATAGT  |
| NOTCH1.1.3.NOTCH1.4_R   | chr9:139390829-139390983 | GCAGCCAGCAAAACATCC    |
| NOTCH1.1.3.NOTCH1.5_F   | chr9:139391317-139391480 | ACAGTGAAATTCAGGGCCC   |
| NOTCH1.1.3.NOTCH1.5_R   | chr9:139391317-139391480 | AACCACCTGCCTGGGAT     |
| NOTCH1.1.4.NOTCH1.6_F   | chr9:139390718-139390879 | GTGTTGTCCACAGGCCA     |
| NOTCH1.1.4.NOTCH1.6_R   | chr9:139390718-139390879 | GAGCTTCTGAGTGGAGAG    |
| NOTCH1.1.4.NOTCH1.7_F   | chr9:139391498-139391663 | ATCCCAGGCAGGTGGTT     |
| NOTCH1.1.4.NOTCH1.7_R   | chr9:139391498-139391663 | AAGGAGGCCAAGGACCT     |
| NOTCH1.1.5.NOTCH1.8_F   | chr9:139390677-139390812 | TGAGGAAGGGGTGCTCA     |
| NOTCH1.1.5.NOTCH1.8_R   | chr9:139390677-139390812 | CACACTATTCTGCCCCAGG   |
| NOTCH1.1.5.NOTCH1.9_F   | chr9:139391664-139391828 | TTCTTCTCCGTGCCTTG     |
| NOTCH1.1.5.NOTCH1.9_R   | chr9:139391664-139391828 | TACAACCTGGTGCGCAG     |
| NOTCH1.1.5.NOTCH1.10_F  | chr9:139391396-139391554 | AGGTGGGCCAGTCTCAA     |
| NOTCH1.1.5.NOTCH1.10_R  | chr9:139391396-139391554 | CCATGGCTACTGTGCAGAC   |
| NOTCH1.1.6.NOTCH1.11_F  | chr9:139391144-139391297 | AGCAAGGCTACTGTGCAG    |
| NOTCH1.1.6.NOTCH1.11_R  | chr9:139391144-139391297 | GGGCCCTGAATTCACCTGT   |
| NOTCH1.1.7.NOTCH1.12_F  | chr9:139391234-139391377 | AGAGGGTTGTATTGGTTCCG  |
| NOTCH1.1.7.NOTCH1.12_R  | chr9:139391234-139391377 | TTTGAGACTGGCCACCT     |
| NOTCH1.1.10.NOTCH1.13_F | chr9:139391898-139392058 | GCTCCTGTGCGATGTCG     |
| NOTCH1.1.10.NOTCH1.13_R | chr9:139391898-139392058 | AACCTTGGGGAGGGTCC     |
| NOTCH1.1.11.NOTCH1.14_F | chr9:139391759-139391906 | TTGAGGCTGCCAGGTA      |
| NOTCH1.1.11.NOTCH1.14_R | chr9:139391759-139391906 | ATCACGGATCATATGGACCC  |
| NOTCH1.18.6.NOTCH1.1_F  | chr9:139405082-139405229 | TGAGAGCTTCTGGAGGAG    |
| NOTCH1.18.6.NOTCH1.1_R  | chr9:139405082-139405229 | GTGAGGTCGACATCAACGA   |
| NOTCH1.18.8.NOTCH1.2_F  | chr9:139405200-139405354 | TGGGTGTTCTGGCAGGAT    |
| NOTCH1.18.8.NOTCH1.2_R  | chr9:139405200-139405354 | GTACCGGAAGCCTACTCCT   |
| NOTCH1.30.1.NOTCH1.1_F  | chr9:139413904-139414042 | TATACGCGCCTGTCCACT    |
| NOTCH1.30.1.NOTCH1.1_R  | chr9:139413904-139414042 | ACTGGACCTCAGGGAAGAG   |
| NOTCH1.30.2.NOTCH1.2_F  | chr9:139413837-139413968 | ATGCCGTGTGAGTGCAGTTTA |
| NOTCH1.30.2.NOTCH1.2_R  | chr9:139413837-139413968 | ATCGACGATTGTCCAGGAAA  |
| NOTCH1.16.10.NOTCH1.1_F | chr9:139403342-139403505 | CAGTTGGGGCCAGTGT      |
| NOTCH1.16.10.NOTCH1.1_R | chr9:139403342-139403505 | CTCCTGCTTCAACGGTGG    |
| NOTCH1.16.11.NOTCH1.2_F | chr9:139403440-139403601 | ACTCATTGACATCGTGTCTGG |
| NOTCH1.16.11.NOTCH1.2_R | chr9:139403440-139403601 | TTGAGCAGAAGGGGAGGT    |
| NOTCH1.16.12.NOTCH1.3_F | chr9:139403261-139403418 | GTGACCGTTCACCTC       |
| NOTCH1.16.12.NOTCH1.3_R | chr9:139403261-139403418 | CAGCACGATGTCAATGAGTG  |
| NOTCH1.25.13.NOTCH1.1_F | chr9:139410404-139410568 | TGTTCCGCTCCCCAGTC     |
| NOTCH1.25.13.NOTCH1.1_R | chr9:139410404-139410568 | CTGTTGCACATGACTCCCT   |
| NOTCH1.27.1.NOTCH1.1_F  | chr9:139412274-139412435 | TTCTGGCACGGGTTCTGA    |
| NOTCH1.27.1.NOTCH1.1_R  | chr9:139412274-139412435 | TGCAGTGAGGTGTTGCAG    |

|                         |                          |                       |
|-------------------------|--------------------------|-----------------------|
| NOTCH1.27.2.NOTCH1.2_F  | chr9:139412137-139412277 | GAAGCAACCCACAGATGTTTC |
| NOTCH1.27.2.NOTCH1.2_R  | chr9:139412137-139412277 | AGATCGACGTCAACGAGTG   |
| NOTCH1.28.6.NOTCH1.1_F  | chr9:139412541-139412696 | GACTTCTCATCGGTTCTGGG  |
| NOTCH1.28.6.NOTCH1.1_R  | chr9:139412541-139412696 | ATCAGCAACCCCTGTAACG   |
| NOTCH1.28.8.NOTCH1.2_F  | chr9:139412678-139412812 | CTTGCCATTGACAGGGTTG   |
| NOTCH1.28.8.NOTCH1.2_R  | chr9:139412678-139412812 | TGTCAGTGGGGTTGGAC     |
| NOTCH1.20.10.NOTCH1.1_F | chr9:139407480-139407620 | CCACCCCTCACCTGTGTA    |
| NOTCH1.20.10.NOTCH1.1_R | chr9:139407480-139407620 | CAAGGTGCCGTTGGAGTG    |
| NOTCH1.20.11.NOTCH1.2_F | chr9:139407348-139407508 | CTTTACCCCTCCAGTACGG   |
| NOTCH1.20.11.NOTCH1.2_R | chr9:139407348-139407508 | CACGTGTATTGACGACGTTG  |
| NOTCH1.14.1.NOTCH1.1_F  | chr9:139402443-139402599 | AGGTAGTCCGTGCAGGT     |
| NOTCH1.14.1.NOTCH1.1_R  | chr9:139402443-139402599 | ACCTGTCTACCACCCCATC   |
| NOTCH1.14.2.NOTCH1.2_F  | chr9:139402321-139402481 | GGGCCATCAGGTTTCACTTT  |
| NOTCH1.14.2.NOTCH1.2_R  | chr9:139402321-139402481 | CAGCTACTGTGAGGACCTG   |
| NOTCH1.24.1.NOTCH1.1_F  | chr9:139409964-139410126 | CTTCAGGCAGAAGCAGAGG   |
| NOTCH1.24.1.NOTCH1.1_R  | chr9:139409964-139410126 | TGGACATCGATGAGTGCG    |
| NOTCH1.24.2.NOTCH1.2_F  | chr9:139410039-139410191 | ACTCGTGTATGTTGGTCTCG  |
| NOTCH1.24.2.NOTCH1.2_R  | chr9:139410039-139410191 | GCCAGTCTAAGTCTTCCTG   |
| NOTCH1.24.2.NOTCH1.3_F  | chr9:139409853-139410011 | TTGATCTCGCAGTTGGGTC   |
| NOTCH1.24.2.NOTCH1.3_R  | chr9:139409853-139410011 | AACATCAACGAGTGCTCCAG  |
| NOTCH1.10.1.NOTCH1.1_F  | chr9:139399772-139399935 | AGCCTTACTTGCCTGCG     |
| NOTCH1.10.1.NOTCH1.1_R  | chr9:139399772-139399935 | CAGTGCACCAACACCGC     |
| NOTCH1.10.2.NOTCH1.2_F  | chr9:139399732-139399880 | CACATCCAAGTTCAGGTCCT  |
| NOTCH1.10.2.NOTCH1.2_R  | chr9:139399732-139399880 | TCAATGACCCCTGGGAAGAAC |
| NOTCH1.10.2.NOTCH1.3_F  | chr9:139399956-139400115 | GTGGTTGTTGCACTGCAG    |
| NOTCH1.10.2.NOTCH1.3_R  | chr9:139399956-139400115 | ACATCCGAGAGCCCTT      |
| NOTCH1.10.3.NOTCH1.4_F  | chr9:139399911-139400052 | GGGTCATTGAAGTTGAGGGA  |
| NOTCH1.10.3.NOTCH1.4_R  | chr9:139399911-139400052 | CACATCCTGGACTACAGCTT  |
| NOTCH1.10.3.NOTCH1.5_F  | chr9:139400126-139400291 | ACGGTAGAAGGGGCTCT     |
| NOTCH1.10.3.NOTCH1.5_R  | chr9:139400126-139400291 | ATGACGCTCGTACCTGC     |
| NOTCH1.10.4.NOTCH1.6_F  | chr9:139400276-139400425 | ATGTGCCGCGGTTGA       |
| NOTCH1.10.4.NOTCH1.6_R  | chr9:139400276-139400425 | CCTCCCAGGTTAGAGGAGAG  |
| NOTCH1.10.4.NOTCH1.7_F  | chr9:139399972-139400127 | AGGCTGCAGACCTTGTGTG   |
| NOTCH1.10.4.NOTCH1.7_R  | chr9:139399972-139400127 | ACCTGTGAGCCACATC      |
| NOTCH1.31.1.NOTCH1.1_F  | chr9:139417507-139417640 | CTTCTGGCCACACTCGTT    |
| NOTCH1.31.1.NOTCH1.1_R  | chr9:139417507-139417640 | CTTGTCCCTTGTCTCCAG    |
| NOTCH1.31.8.NOTCH1.2_F  | chr9:139417332-139417495 | ACACTCGTGGGTGACGT     |
| NOTCH1.31.8.NOTCH1.2_R  | chr9:139417332-139417495 | AGGATGTCAACGAGTGTGG   |
| NOTCH1.31.9.NOTCH1.3_F  | chr9:139417465-139417629 | ACCTCGTGTGGCAGGT      |
| NOTCH1.31.9.NOTCH1.3_R  | chr9:139417465-139417629 | TCTCCAGGGAATCGTGC     |
| NOTCH1.31.13.NOTCH1.4_F | chr9:139417190-139417356 | CATCCCGCCTTCCCAAC     |
| NOTCH1.31.13.NOTCH1.4_R | chr9:139417190-139417356 | CTCGCCCTGCCAGAAC      |
| NOTCH1.11.10.NOTCH1.1_F | chr9:139400934-139401097 | ACGTGGACCTCTCCAGG     |
| NOTCH1.11.10.NOTCH1.1_R | chr9:139400934-139401097 | CTCACTGCCCTGCTTTAC    |
| NOTCH1.22.6.NOTCH1.1_F  | chr9:139408949-139409114 | TGTGTCCCATGATCGG      |
| NOTCH1.22.6.NOTCH1.1_R  | chr9:139408949-139409114 | GATGAGTGTGCGGGCAA     |
| NOTCH1.22.7.NOTCH1.2_F  | chr9:139409083-139409214 | CAGGTGAAGCCATTGATGC   |
| NOTCH1.22.7.NOTCH1.2_R  | chr9:139409083-139409214 | AACAGACAGGGAATCGAGG   |
| NOTCH1.13.1.NOTCH1.1_F  | chr9:139401735-139401889 | ATGGATGGCCAAACACCAAG  |
| NOTCH1.13.1.NOTCH1.1_R  | chr9:139401735-139401889 | TTCTGTCCCTGCACAG      |
| NOTCH1.23.1.NOTCH1.1_F  | chr9:139409712-139409865 | CTTGACCTCTGAGCACAGTG  |
| NOTCH1.23.1.NOTCH1.1_R  | chr9:139409712-139409865 | AGGACTGACCCGACCGT     |
| NOTCH1.29.1.NOTCH1.1_F  | chr9:139413071-139413235 | ATGGGGACACTCGCAGTA    |
| NOTCH1.29.1.NOTCH1.1_R  | chr9:139413071-139413235 | ACGAGTGCCAGCTGATG     |
| NOTCH1.29.2.NOTCH1.2_F  | chr9:139413188-139413322 | TTGACACACACGCAAGTTGTA |
| NOTCH1.29.2.NOTCH1.2_R  | chr9:139413188-139413322 | TCTTAGGGGACAGGGAGCT   |
| NOTCH1.29.2.NOTCH1.3_F  | chr9:139412994-139413129 | TGAGGTCCACACAGCTCAGG  |
| NOTCH1.29.2.NOTCH1.3_R  | chr9:139412994-139413129 | CTGCAGCGAGAATTGATG    |
| NOTCH1.6.1.NOTCH1.1_F   | chr9:139396388-139396548 | ACATAGAGGGAGTGAGCAGA  |
| NOTCH1.6.1.NOTCH1.1_R   | chr9:139396388-139396548 | CTCACTTCTCGACCCCTCA   |
| NOTCH1.3.1.NOTCH1.1_F   | chr9:139393577-139393739 | GCTCACCCAGGTATCTTAC   |
| NOTCH1.3.1.NOTCH1.1_R   | chr9:139393577-139393739 | TGTACGTCTGCCAGCA      |
| NOTCH1.3.2.NOTCH1.2_F   | chr9:139393463-139393593 | CTTGCCCTGCGTGAAGAGAG  |
| NOTCH1.3.2.NOTCH1.2_R   | chr9:139393463-139393593 | GGAGGACCTCATCAACTCAC  |
| NOTCH1.9.6.NOTCH1.1_F   | chr9:139399102-139399247 | GAGAGTTGCGGGGATTGAC   |
| NOTCH1.9.6.NOTCH1.1_R   | chr9:139399102-139399247 | CGCAAGCACCCCATCAA     |
| NOTCH1.9.10.NOTCH1.2_F  | chr9:139399348-139399514 | ACGTTGGTGTGCAGCA      |

|                         |                          |                        |
|-------------------------|--------------------------|------------------------|
| NOTCH1.9.10.NOTCH1.2_R  | chr9:139399348-139399514 | GACCACTTCAGCGACGG      |
| NOTCH1.9.12.NOTCH1.3_F  | chr9:139399508-139399663 | CTGTTGCAGCCCTGGTC      |
| NOTCH1.9.12.NOTCH1.3_R  | chr9:139399508-139399663 | CAGTTCTAAGGCTCTGCTCA   |
| NOTCH1.9.12.NOTCH1.4_F  | chr9:139399204-139399363 | AGCGAGGCCCTCACCT       |
| NOTCH1.9.12.NOTCH1.4_R  | chr9:139399204-139399363 | CAGCTCCTTCCACTTCCTG    |
| NOTCH1.12.1.NOTCH1.1_F  | chr9:139401267-139401431 | TGGACAGGCACTCGTTGA     |
| NOTCH1.12.1.NOTCH1.1_R  | chr9:139401267-139401431 | ACTGACGAAACCTGGCC      |
| NOTCH1.12.10.NOTCH1.2_F | chr9:139401117-139401274 | GTAAGAGCAGGGCAGTGAG    |
| NOTCH1.12.10.NOTCH1.2_R | chr9:139401117-139401274 | TGGGTGAGCGCTGTGA       |
| NOTCH1.15.1.NOTCH1.1_F  | chr9:139402684-139402842 | TGGGCACAGCAGGTTAC      |
| NOTCH1.15.1.NOTCH1.1_R  | chr9:139402684-139402842 | CAGCTGACCCCAATCTGTC    |
| NOTCH1.8.1.NOTCH1.1_F   | chr9:139397491-139397650 | GCGGAGTGCCATTTCAGAAAA  |
| NOTCH1.8.1.NOTCH1.1_R   | chr9:139397491-139397650 | AGCCTCAACATCCCCTACAA   |
| NOTCH1.8.2.NOTCH1.2_F   | chr9:139397636-139397789 | GATGGGCCACACTTACTC     |
| NOTCH1.8.2.NOTCH1.2_R   | chr9:139397636-139397789 | CAGCCCTCTCTGATTGTC     |
| NOTCH1.8.2.NOTCH1.3_F   | chr9:139397379-139397537 | CCAACAAAGAAAATTCAGGAGG |
| NOTCH1.8.2.NOTCH1.3_R   | chr9:139397379-139397537 | TTTGTGCCAGTTGCTACCC    |
| NOTCH1.8.3.NOTCH1.4_F   | chr9:139397219-139397378 | CAACTTCAAATCGTGCCT     |
| NOTCH1.8.3.NOTCH1.4_R   | chr9:139397219-139397378 | GCTTCTCTCCCCACCCTTT    |
| NOTCH1.4.1.NOTCH1.1_F   | chr9:139395024-139395185 | GGAAGACACCTTGTGCGT     |
| NOTCH1.4.1.NOTCH1.1_R   | chr9:139395024-139395185 | GACTTCATCTACCAGGGCG    |
| NOTCH1.4.2.NOTCH1.2_F   | chr9:139395176-139395311 | TGCGGTCTGTCTGGTTG      |
| NOTCH1.4.2.NOTCH1.2_R   | chr9:139395176-139395311 | AGACTGAGCACCCGTCT      |
| NOTCH1.4.2.NOTCH1.3_F   | chr9:139394895-139395056 | ACCAGTTGTCCCGACT       |
| NOTCH1.4.2.NOTCH1.3_R   | chr9:139394895-139395056 | CAACATCCAGGACAACATGG   |
| NOTCH1.34.14.NOTCH1.1_F | chr9:139440140-139440342 | CGCCAAAGTTTCCAAAGGG    |
| NOTCH1.34.14.NOTCH1.1_R | chr9:139440140-139440342 | GGAAGAGAGGGCGGGACC     |
| NOTCH1.19.1.NOTCH1.1_F  | chr9:139405573-139405724 | AGACATCCTGACCTCCCATC   |
| NOTCH1.19.1.NOTCH1.1_R  | chr9:139405573-139405724 | TGTGTCTCCTTCCCGCA      |
| NOTCH1.5.1.NOTCH1.1_F   | chr9:139396230-139396367 | ACATTGACGTCCATGCAGT    |
| NOTCH1.5.1.NOTCH1.1_R   | chr9:139396230-139396367 | TCTGCTCACCCTCTATGT     |
| NOTCH1.5.2.NOTCH1.2_F   | chr9:139396103-139396264 | GCTCTCACCCCAATTCTAA    |
| NOTCH1.5.2.NOTCH1.2_R   | chr9:139396103-139396264 | CTGCCATGCTCTGCCAT      |
| FGFR1.11.1.FGFR1.1_F    | chr8:38279174-38279335   | GGATTGAGCCCTCAAAGCT    |
| FGFR1.11.1.FGFR1.1_R    | chr8:38279174-38279335   | GGACTCTCCATCACTCTG     |
| FGFR1.11.2.FGFR1.2_F    | chr8:38279326-38279469   | AGTGTGTACCTTCCAGAACG   |
| FGFR1.11.2.FGFR1.2_R    | chr8:38279326-38279469   | TGTCCATTTTGCTTCCGTTG   |
| FGFR1.11.2.FGFR1.3_F    | chr8:38279158-38279305   | TCTTCTCTGAGCTGAGAGGA   |
| FGFR1.11.2.FGFR1.3_R    | chr8:38279158-38279305   | CGTTCTGGAAGGTACACACT   |
| FGFR1.7.1.FGFR1.1_F     | chr8:38274789-38274946   | CAGCTCAGATCTTCTCCCC    |
| FGFR1.7.1.FGFR1.1_R     | chr8:38274789-38274946   | CCCAAGTAAATGAGTCTCAACG |
| FGFR1.2.4.FGFR1.1_F     | chr8:38271423-38271566   | AGCTCTGGCTCTGGCA       |
| FGFR1.2.4.FGFR1.1_R     | chr8:38271423-38271566   | TATCCATCTCCAGGAGACGT   |
| FGFR1.17.1.FGFR1.1_F    | chr8:38297747-38297905   | TAAAAGGAGCACAGAACAGC   |
| FGFR1.17.1.FGFR1.1_R    | chr8:38297747-38297905   | ATTTTTGGGGCTCTCTCCAC   |
| FGFR1.1.1.FGFR1.1_F     | chr8:38271161-38271323   | AGTCAGCGCGTTTGAG       |
| FGFR1.1.1.FGFR1.1_R     | chr8:38271161-38271323   | TTCCCTCTCGCCCATCACA    |
| FGFR1.1.2.FGFR1.2_F     | chr8:38271114-38271273   | GGTGAGGGTTACAGCTGAC    |
| FGFR1.1.2.FGFR1.2_R     | chr8:38271114-38271273   | CAGTACTCCCCACGTTTC     |
| FGFR1.18.1.FGFR1.1_F    | chr8:38314924-38315068   | TGCAGAGTGTGGCTGTG      |
| FGFR1.18.1.FGFR1.1_R    | chr8:38314924-38315068   | CCCTCCTAACTTTTGGGGTT   |
| FGFR1.18.2.FGFR1.2_F    | chr8:38314812-38314970   | ACCTGCAACCATATCACCTC   |
| FGFR1.18.2.FGFR1.2_R    | chr8:38314812-38314970   | CACCAACCTCTAACTGCAGA   |
| FGFR1.16.1.FGFR1.1_F    | chr8:38287199-38287360   | CAGGGCTTGGCTACCAA      |
| FGFR1.16.1.FGFR1.1_R    | chr8:38287199-38287360   | GATGTGCAGAGCATCAACTG   |
| FGFR1.16.2.FGFR1.2_F    | chr8:38287344-38287505   | GTTGCTTTCGCCAGCT       |
| FGFR1.16.2.FGFR1.2_R    | chr8:38287344-38287505   | TCTCCCTGTCTTCTCTCTC    |
| FGFR1.13.1.FGFR1.1_F    | chr8:38283613-38283767   | GGCTCTTCCCACTAAACTCA   |
| FGFR1.13.1.FGFR1.1_R    | chr8:38283613-38283767   | TATCCCTTTGGCATTTC      |
| FGFR1.6.1.FGFR1.1_F     | chr8:38273388-38273547   | GAGCCTTCAGGTTCCACAC    |
| FGFR1.6.1.FGFR1.1_R     | chr8:38273388-38273547   | GTCATCGTGGAGTATGCCTC   |
| FGFR1.6.2.FGFR1.2_F     | chr8:38273501-38273630   | GGGGTTGTAGCAGTATTC     |
| FGFR1.6.2.FGFR1.2_R     | chr8:38273501-38273630   | GGGTTTCTTTGAGGTGAAGC   |
| FGFR1.3.1.FGFR1.1_F     | chr8:38271670-38271828   | GACATCTCCTCGGGCTTAC    |
| FGFR1.3.1.FGFR1.1_R     | chr8:38271670-38271828   | GGAGAAGCTCTAACACCCTG   |
| FGFR1.9.1.FGFR1.1_F     | chr8:38275731-38275892   | TGCCTTCAAAAAGTTGGGAG   |
| FGFR1.9.1.FGFR1.1_R     | chr8:38275731-38275892   | ACCCCACTCTTCTTTGCA     |

|                       |                          |                        |
|-----------------------|--------------------------|------------------------|
| FGFR1.12.1.FGFR1.1_F  | chr8:38281837-38282002   | CTGTTCCAGTCACCT        |
| FGFR1.12.1.FGFR1.1_R  | chr8:38281837-38282002   | TGGCACCAGTCTTCGTG      |
| FGFR1.12.2.FGFR1.2_F  | chr8:38282000-38282162   | GTCTCCTTCCCAGTAGACTG   |
| FGFR1.12.2.FGFR1.2_R  | chr8:38282000-38282162   | CCCGCCAACAAAACAGT      |
| FGFR1.12.2.FGFR1.3_F  | chr8:38281745-38281885   | GTCCAAATGCCTTCCTTGTG   |
| FGFR1.12.2.FGFR1.3_R  | chr8:38281745-38281885   | CACACACACTCCATCTCAGT   |
| FGFR1.12.3.FGFR1.4_F  | chr8:38282105-38282253   | ATGTGCTTTAGCCACTGGAT   |
| FGFR1.12.3.FGFR1.4_R  | chr8:38282105-38282253   | CTCTTTAGCCATGGCAAGGT   |
| FGFR1.14.1.FGFR1.1_F  | chr8:38285435-38285598   | CTTTCGCATGCACACACAC    |
| FGFR1.14.1.FGFR1.1_R  | chr8:38285435-38285598   | GCAGCCGTAGTCCATA       |
| FGFR1.14.2.FGFR1.2_F  | chr8:38285462-38285618   | GTAGCCTCCAATTCGTGGT    |
| FGFR1.14.2.FGFR1.2_R  | chr8:38285462-38285618   | CTGTCTCTCTGGCTTTCCC    |
| FGFR1.15.1.FGFR1.1_F  | chr8:38285847-38286000   | GACCCAAAGGGCAGTAAGAT   |
| FGFR1.15.1.FGFR1.1_R  | chr8:38285847-38286000   | TGCACTAGCCTTGGTGAAAT   |
| FGFR1.8.1.FGFR1.1_F   | chr8:38275358-38275516   | TGCTTGGAAATGGGACAAGAT  |
| FGFR1.8.1.FGFR1.1_R   | chr8:38275358-38275516   | TATGCCACTCTCTGTTTCCC   |
| FGFR1.4.1.FGFR1.1_F   | chr8:38271986-38272148   | TTTCTCTCTGGGGCAGAAA    |
| FGFR1.4.1.FGFR1.1_R   | chr8:38271986-38272148   | CCCCGTGCTGCTTTCA       |
| FGFR1.10.1.FGFR1.1_F  | chr8:38277081-38277240   | CGCAGAGGGATGCTCTT      |
| FGFR1.10.1.FGFR1.1_R  | chr8:38277081-38277240   | ACTCAGCCCTGGAAGAGAG    |
| FGFR1.10.2.FGFR1.2_F  | chr8:38277204-38277345   | GCCCTGTGCAATAGATGAT    |
| FGFR1.10.2.FGFR1.2_R  | chr8:38277204-38277345   | CTCCCTAAAAGTTCCCAGGG   |
| FGFR1.10.2.FGFR1.3_F  | chr8:38277048-38277183   | GTGCAAAATCCCCATCTACT   |
| FGFR1.10.2.FGFR1.3_R  | chr8:38277048-38277183   | ATCATCTATTGCACAGGGGC   |
| FGFR1.19.1.FGFR1.1_F  | chr8:38318531-38318669   | CTAGGCTCCTGGGATTCATG   |
| FGFR1.19.1.FGFR1.1_R  | chr8:38318531-38318669   | CTCCAGTGAGAAGACAGCAG   |
| FGFR1.5.1.FGFR1.1_F   | chr8:38272272-38272421   | TCTCAGATGAAACCACCAGC   |
| FGFR1.5.1.FGFR1.1_R   | chr8:38272272-38272421   | CTCTCCCTTCTCCTTCTCCT   |
| CYP2C9.8.1.CYP2C9.1_F | chr10:96745800-96745946  | TTGTTTCTAGGGCACAAACCA  |
| CYP2C9.8.1.CYP2C9.1_R | chr10:96745800-96745946  | ACCCTGAAACACAAATGGAA   |
| CYP2C9.8.2.CYP2C9.2_F | chr10:96745675-96745808  | GGAAATGGTACTGCCTTCT    |
| CYP2C9.8.2.CYP2C9.2_R | chr10:96745675-96745808  | ATGTAGCACAGAAGTCAGGG   |
| CYP2C9.6.1.CYP2C9.1_F | chr10:96731881-96732040  | GAAAAGCACAAACCAACCATC  |
| CYP2C9.6.1.CYP2C9.1_R | chr10:96731881-96732040  | GCAACACCTTCCCAAAATCT   |
| CYP2C9.6.4.CYP2C9.2_F | chr10:96731770-96731914  | ACTTTCAGTTTCTATGTTGGT  |
| CYP2C9.6.4.CYP2C9.2_R | chr10:96731770-96731914  | CCAGCTCCAACCAAGTCAAC   |
| CYP2C9.1.1.CYP2C9.1_F | chr10:96698450-96698607  | AGAAGGCTTCAATGGATTCTC  |
| CYP2C9.1.1.CYP2C9.1_R | chr10:96698450-96698607  | CCACTGAAGGAGCATACTTAC  |
| CYP2C9.1.2.CYP2C9.2_F | chr10:96698380-96698537  | ACACACCCGAATTAGCATGGA  |
| CYP2C9.1.2.CYP2C9.2_R | chr10:96698380-96698537  | CAATCACTGGGAGAGGAGTG   |
| CYP2C9.4.1.CYP2C9.1_F | chr10:96707551-96707699  | TTTAGCCTCACCCCTGTGATC  |
| CYP2C9.4.1.CYP2C9.1_R | chr10:96707551-96707699  | GGAAGCAAAAATCTTGGCCT   |
| CYP2C9.4.2.CYP2C9.2_F | chr10:96707421-96707576  | ATGCATGCCGAACCTTTTTT   |
| CYP2C9.4.2.CYP2C9.2_R | chr10:96707421-96707576  | ATGGAGCAGATCACATTGCA   |
| CYP2C9.3.1.CYP2C9.1_F | chr10:96701963-96702106  | CCTGTTAGGAATTGTTTTCAGC |
| CYP2C9.3.1.CYP2C9.1_R | chr10:96701963-96702106  | GGTCAGTGATATGGAGTAGGG  |
| CYP2C9.3.2.CYP2C9.2_F | chr10:96701836-96701969  | GATGGGGAGGATGGAAAACA   |
| CYP2C9.3.2.CYP2C9.2_R | chr10:96701836-96701969  | CCGGATCTCCTTCCATTCT    |
| CYP2C9.7.1.CYP2C9.1_F | chr10:96740980-96741139  | GAACGTGTGATTGGCAGAAA   |
| CYP2C9.7.1.CYP2C9.1_R | chr10:96740980-96741139  | ATGGAGTTGCAGTGTAGGAG   |
| CYP2C9.7.2.CYP2C9.2_F | chr10:96740890-96741033  | ACCCCTGAATTGCTACAACA   |
| CYP2C9.7.2.CYP2C9.2_R | chr10:96740890-96741033  | GTATCTCTGGACCTCGTGC    |
| CYP2C9.9.1.CYP2C9.1_F | chr10:96748623-96748783  | GGAAAACGGATTTGTGTGGG   |
| CYP2C9.9.1.CYP2C9.1_R | chr10:96748623-96748783  | AGGCCATCTGCTCTTCTTC    |
| CYP2C9.9.2.CYP2C9.2_F | chr10:96748775-96748923  | CTTCTACCAGCTGTGCTTCA   |
| CYP2C9.9.2.CYP2C9.2_R | chr10:96748775-96748923  | TCCGTAATGGAGGTCGAATG   |
| CYP2C9.9.2.CYP2C9.3_F | chr10:96748571-96748704  | ACTGTACAGTTACGCATGA    |
| CYP2C9.9.2.CYP2C9.3_R | chr10:96748571-96748704  | GGAGTGGTGTCAAGGTTCTT   |
| CYP2C9.2.1.CYP2C9.1_F | chr10:96701625-96701783  | CTACTTTCCTAGCTCTCAAAGG |
| CYP2C9.2.1.CYP2C9.1_R | chr10:96701625-96701783  | CTGAAACAGGCACATGCAC    |
| CYP2C9.2.2.CYP2C9.2_F | chr10:96701572-96701720  | TCAGGCTTAGCAAATGGACA   |
| CYP2C9.2.2.CYP2C9.2_R | chr10:96701572-96701720  | GCCTCTCCAGAAAACCTCCT   |
| CYP2C9.5.1.CYP2C9.1_F | chr10:96708905-96709058  | CCTATCATTGATTACTTCCCGG |
| CYP2C9.5.1.CYP2C9.1_R | chr10:96708905-96709058  | ACAAGCAGTCACATAACTAAGC |
| CYP2C9.5.3.CYP2C9.2_F | chr10:96708815-96708969  | CCAGAGCTTGGTATATGGTATG |
| CYP2C9.5.3.CYP2C9.2_R | chr10:96708815-96708969  | TGTCCATTGATTCTTGGTGTTC |
| MET.11.1.MET.1_F      | chr7:116399461-116399620 | CAGTGGTGGGAGCAATA      |

|                  |                          |                        |
|------------------|--------------------------|------------------------|
| MET.11.1.MET.1_R | chr7:116399461-116399620 | AAAGGCGAACTGAGATGTC    |
| MET.11.2.MET.2_F | chr7:116399583-116399715 | GGTTCTACTCAGAGCTCTGC   |
| MET.11.2.MET.2_R | chr7:116399583-116399715 | TTCCACATGGTTAGCCCAA    |
| MET.11.2.MET.3_F | chr7:116399345-116399487 | TTGATGTTGACTGTGCCTCT   |
| MET.11.2.MET.3_R | chr7:116399345-116399487 | ACCATTCTCGGGACACTAAC   |
| MET.21.1.MET.1_F | chr7:116435694-116435851 | TCTCACCTCATCTGTCTGT    |
| MET.21.1.MET.1_R | chr7:116435694-116435851 | ACGTAAGAGGTACAGAAAGACT |
| MET.7.1.MET.1_F  | chr7:116395418-116395576 | TGTCCTTGTAGGTTTTCCCA   |
| MET.7.1.MET.1_R  | chr7:116395418-116395576 | CCCCAGCAAAGCATTTTTAAGA |
| MET.7.10.MET.2_F | chr7:116395266-116395417 | TGTGACCCTTTTCCCTTTAGT  |
| MET.7.10.MET.2_R | chr7:116395266-116395417 | CCTTCAAGGGTGCACATATT   |
| MET.17.1.MET.1_F | chr7:116417443-116417594 | CCAAGTTCTTCTTTTGACACAG |
| MET.17.1.MET.1_R | chr7:116417443-116417594 | GGGGAAAGTGTAATCAACGT   |
| MET.2.1.MET.1_F  | chr7:116339125-116339284 | CCTTGAACTGTTTTGGCAG    |
| MET.2.1.MET.1_R  | chr7:116339125-116339284 | TGACATTCTGGATGGGTGTT   |
| MET.2.2.MET.2_F  | chr7:116339395-116339555 | AGAAGGTTGCTGAGTACAAGA  |
| MET.2.2.MET.2_R  | chr7:116339395-116339555 | ACATGTCGCTGGCAGGT      |
| MET.2.3.MET.3_F  | chr7:116339280-116339409 | ATCAGCTTCCCAACTTCACC   |
| MET.2.3.MET.3_R  | chr7:116339280-116339409 | TGGGAACAATCTGGGTGTT    |
| MET.2.3.MET.4_F  | chr7:116339596-116339755 | TCCCCACAATCATACTGCTG   |
| MET.2.3.MET.4_R  | chr7:116339596-116339755 | AATGCAATGGATGATCTGGG   |
| MET.2.4.MET.5_F  | chr7:116339542-116339701 | TCAACTCATTAGCTGTGGCA   |
| MET.2.4.MET.5_R  | chr7:116339542-116339701 | AGTTGATGAACCGTCCCTTT   |
| MET.2.4.MET.6_F  | chr7:116339846-116340005 | ACGGACCAGTCTACATGA     |
| MET.2.4.MET.6_R  | chr7:116339846-116340005 | AGAGGCATTTCCATGTAGGA   |
| MET.2.5.MET.7_F  | chr7:116340005-116340165 | GTTCCATAAATCTGGATTGCA  |
| MET.2.5.MET.7_R  | chr7:116340005-116340165 | TTGTGCGAACACCCCGA      |
| MET.2.5.MET.8_F  | chr7:116339725-116339883 | GGACCGGTTTCATCAACTTCT  |
| MET.2.5.MET.8_R  | chr7:116339725-116339883 | GCTTTCAAAGGCATGGACAT   |
| MET.2.6.MET.9_F  | chr7:116340179-116340340 | TCTTTTCGGGGTGTTCGC     |
| MET.2.6.MET.9_R  | chr7:116340179-116340340 | GTGGGGAACGTGATGACTT    |
| MET.2.7.MET.10_F | chr7:116340034-116340189 | GGAATGCCTCTGGAGTGTA    |
| MET.2.7.MET.10_R | chr7:116340034-116340189 | CATTGGTTCGGCAGAATCTG   |
| MET.22.1.MET.1_F | chr7:116435970-116436131 | ATGCTAAAATGCTGGCACCC   |
| MET.22.1.MET.1_R | chr7:116435970-116436131 | CGTGTGTCCACCTCATCAT    |
| MET.22.2.MET.2_F | chr7:116436072-116436203 | TGTCCATGTGAACGCTACTT   |
| MET.22.2.MET.2_R | chr7:116436072-116436203 | ACCATTGGACAAAGTGTGGA   |
| MET.22.2.MET.3_F | chr7:116435904-116436051 | TACAGAAATGCCTGCCTTCA   |
| MET.22.2.MET.3_R | chr7:116435904-116436051 | AAGTAGCGTTTCACATGGACA  |
| MET.1.1.MET.1_F  | chr7:116335808-116335965 | ACTTCCTTCTTCACAGGGTG   |
| MET.1.1.MET.1_R  | chr7:116335808-116335965 | CACTGGGGGTACAGGTTATG   |
| MET.18.1.MET.1_F | chr7:116418858-116419014 | CTGACATAGGAGAAGTTTCCCA |
| MET.18.1.MET.1_R | chr7:116418858-116419014 | AGTAAGCTTGGCAGTCAACT   |
| MET.18.2.MET.2_F | chr7:116418725-116418862 | GTCAAACCCCTCAGGCAAGA   |
| MET.18.2.MET.2_R | chr7:116418725-116418862 | CATGATGATTCCCTCGGTCA   |
| MET.13.1.MET.1_F | chr7:116409799-116409954 | TTCTGAAGCCGTTTATGCA    |
| MET.13.1.MET.1_R | chr7:116409799-116409954 | GAATGCAGGCTGAGTTGATG   |
| MET.13.2.MET.2_F | chr7:116409666-116409815 | TTCTGCAGAACTGTGAAGT    |
| MET.13.2.MET.2_R | chr7:116409666-116409815 | AGCTCGCTGTCAATTTTCAG   |
| MET.16.1.MET.1_F | chr7:116415061-116415218 | CCATTACTGCAAAATACGTCC  |
| MET.16.1.MET.1_R | chr7:116415061-116415218 | AATCTGCAAAGGCCAAAGAT   |
| MET.16.8.MET.2_F | chr7:116414896-116415053 | TCAGTCCCCATTAATGAGGT   |
| MET.16.8.MET.2_R | chr7:116414896-116415053 | CTGAGGTCAATGTGGACAGT   |
| MET.16.9.MET.3_F | chr7:116414970-116415101 | CATCTCAGAACGGTTCATGC   |
| MET.16.9.MET.3_R | chr7:116414970-116415101 | CCAATCACTACATGCTGCAC   |
| MET.6.1.MET.1_F  | chr7:116381056-116381215 | CGGGACATGGACTCAACAG    |
| MET.6.1.MET.1_R  | chr7:116381056-116381215 | AGCTGATGACTCACAGCTAA   |
| MET.6.2.MET.2_F  | chr7:116380904-116381058 | TTCCACCCCTTCTCTTCAC    |
| MET.6.2.MET.2_R  | chr7:116380904-116381058 | TTGTAGATTGCAGGCAGACA   |
| MET.3.1.MET.1_F  | chr7:116364766-116364903 | GCAAGGGAAGCTTTTGGAA    |
| MET.3.1.MET.1_R  | chr7:116364766-116364903 | AGGCACTGAGTGTTCACATT   |
| MET.9.1.MET.1_F  | chr7:116397740-116397899 | AATACGGTCTATGGCTGGT    |
| MET.9.1.MET.1_R  | chr7:116397740-116397899 | CCACACACACACAAAACA     |
| MET.9.2.MET.2_F  | chr7:116397604-116397759 | TTCTCCTATGTGGTAAGGAAGA |
| MET.9.2.MET.2_R  | chr7:116397604-116397759 | CCCCTGTTTAGGTAATTTCCA  |
| MET.12.8.MET.1_F | chr7:116403070-116403203 | TGGATGTTGCCAAGCTGTAT   |
| MET.12.8.MET.1_R | chr7:116403070-116403203 | TGGAAAGGATCCCCTAACA    |



|                      |                          |                          |
|----------------------|--------------------------|--------------------------|
| MET.12.11.MET.2_F    | chr7:116403233-116403388 | TGGGATCCTTTCCAATACTTT    |
| MET.12.11.MET.2_R    | chr7:116403233-116403388 | GGCCAAGTACAACAATTGTATT   |
| MET.12.12.MET.3_F    | chr7:116403120-116403279 | CTAGGCATGTCAACATCGCT     |
| MET.12.12.MET.3_R    | chr7:116403120-116403279 | TGCCCATTTGAGATCATCACT    |
| MET.14.8.MET.1_F     | chr7:116411534-116411678 | CATGGCTAAATGCTGACTTTTC   |
| MET.14.8.MET.1_R     | chr7:116411534-116411678 | GCTTCTCTTTTTTCAGCCACA    |
| MET.14.9.MET.2_F     | chr7:116411633-116411778 | TCACAGGATTGATTGCTGGT     |
| MET.14.9.MET.2_R     | chr7:116411633-116411778 | AGACAGCACACAAGAATCGA     |
| MET.20.1.MET.1_F     | chr7:116423378-116423532 | AGGCTGGATGAAAAATTCACAG   |
| MET.20.1.MET.1_R     | chr7:116423378-116423532 | AGGAGAAACTCAGAGATAACCA   |
| MET.20.2.MET.2_F     | chr7:116423245-116423383 | AGGCCAGATGAAATACTTCCT    |
| MET.20.2.MET.2_R     | chr7:116423245-116423383 | GGCAAGACCAAAAATCAGCAA    |
| MET.15.1.MET.1_F     | chr7:116411922-116412078 | AGATCTGGGCAGTGAATTAGT    |
| MET.15.1.MET.1_R     | chr7:116411922-116412078 | ACAACCCACTGAGGTATATGT    |
| MET.15.2.MET.2_F     | chr7:116411799-116411953 | TCGATTCTTGTGTGCTGTCT     |
| MET.15.2.MET.2_R     | chr7:116411799-116411953 | GGCACTTACAGCCTATCCA      |
| MET.8.1.MET.1_F      | chr7:116397511-116397667 | GATTGAAATGCACAGTTGGTC    |
| MET.8.1.MET.1_R      | chr7:116397511-116397667 | GGAGGGGAGATAAAAACAAAAC   |
| MET.8.2.MET.2_F      | chr7:116397408-116397544 | GCAGTCAGCTCACCATTAG      |
| MET.8.2.MET.2_R      | chr7:116397408-116397544 | TCCCGTGGCCATTTGAAATA     |
| MET.4.1.MET.1_F      | chr7:116371772-116371932 | GGCCCGTGATGAATATCG       |
| MET.4.1.MET.1_R      | chr7:116371772-116371932 | CCAGATAGAACAGACACAGCT    |
| MET.4.2.MET.2_F      | chr7:116371643-116371796 | CCATTATCCTCCAGGCTCTG     |
| MET.4.2.MET.2_R      | chr7:116371643-116371796 | CCCATGAATAAGTCAACGCG     |
| MET.19.1.MET.1_F     | chr7:116422042-116422187 | TTCTAACTCTTTTGACTGCAG    |
| MET.19.1.MET.1_R     | chr7:116422042-116422187 | ACAGATTCCCTCTGTCACT      |
| MET.10.1.MET.1_F     | chr7:116398526-116398677 | TGTTCAAGTGTGTCAAACAGT    |
| MET.10.1.MET.1_R     | chr7:116398526-116398677 | ACCCATCAGAAGCTTCTACT     |
| MET.10.2.MET.2_F     | chr7:116398402-116398531 | AGAAAAGGCTTCCACTCAGG     |
| MET.10.2.MET.2_R     | chr7:116398402-116398531 | TGGGCTGGGGTATAACATTC     |
| MET.5.1.MET.1_F      | chr7:116380014-116380168 | TGCTGTTTAGGTTGTGGTTT     |
| MET.5.1.MET.1_R      | chr7:116380014-116380168 | GCATTTGGGAAAACCACGT      |
| MET.5.2.MET.2_F      | chr7:116379921-116380059 | ACAAGCCCTGCTAATCTGTT     |
| MET.5.2.MET.2_R      | chr7:116379921-116380059 | CTTCTGGAGACACTGGATGG     |
| CHEK2.6.1.CHEK2.1_F  | chr22:29092881-29093039  | AGCCACATACAGAATGCCAA     |
| CHEK2.6.1.CHEK2.1_R  | chr22:29092881-29093039  | TGTGAGATGTGTGTGTGGT      |
| CHEK2.11.8.CHEK2.1_F | chr22:29115337-29115477  | TGAGAAACCACCAATCACAAA    |
| CHEK2.11.8.CHEK2.1_R | chr22:29115337-29115477  | ACCCATTTCTACTCTTTTCTTCC  |
| CHEK2.3.9.CHEK2.1_F  | chr22:29089989-29090214  | CAGCAGGGCTTCCCATGTAT     |
| CHEK2.3.9.CHEK2.1_R  | chr22:29089989-29090214  | TGCTGCTGACTCCGTGATG      |
| CHEK2.7.1.CHEK2.1_F  | chr22:29095808-29095964  | GAAAGGCAGCTGTCAAAGA      |
| CHEK2.7.1.CHEK2.1_R  | chr22:29095808-29095964  | TTCTGTCCAAGTGCCTTTTC     |
| CHEK2.9.9.CHEK2.1_F  | chr22:29105909-29106125  | CCACCACCTGGCCAATAT       |
| CHEK2.9.9.CHEK2.1_R  | chr22:29105909-29106125  | CTCAGGCAGCCTTGAGTCAA     |
| CHEK2.12.6.CHEK2.1_F | chr22:29120929-29121083  | CCTCCTATGAGAGAGTGGAAA    |
| CHEK2.12.6.CHEK2.1_R | chr22:29120929-29121083  | GGGTCCATAAAACTCTTACATTGC |
| CHEK2.12.7.CHEK2.2_F | chr22:29121076-29121224  | TCCATTGCCACTGTGATCTT     |
| CHEK2.12.7.CHEK2.2_R | chr22:29121076-29121224  | TTCCGATTTTCAGGGTAGGT     |
| CHEK2.2.1.CHEK2.1_F  | chr22:29085095-29085254  | GCTCCCTTAAGCCCAGACTAC    |
| CHEK2.2.1.CHEK2.1_R  | chr22:29085095-29085254  | TGCTAGCCCTGTCAATCTAG     |
| CHEK2.14.1.CHEK2.1_F | chr22:29126402-29126554  | GGAAAGACCACAGCTAACA      |
| CHEK2.14.1.CHEK2.1_R | chr22:29126402-29126554  | CGTGGCTGGCCTAACTTTTT     |
| CHEK2.15.1.CHEK2.1_F | chr22:29130411-29130570  | CCAAGATTGGCAAATCCATCC    |
| CHEK2.15.1.CHEK2.1_R | chr22:29130411-29130570  | TCCTCTACCAGCACGATGC      |
| CHEK2.15.2.CHEK2.2_F | chr22:29130571-29130727  | GAGGACTGGCTGGAGTTTG      |
| CHEK2.15.2.CHEK2.2_R | chr22:29130571-29130727  | TCACCTTTGTGTGGACAC       |
| CHEK2.15.2.CHEK2.3_F | chr22:29130324-29130466  | TCCAATCAGAACCTTCCACC     |
| CHEK2.15.2.CHEK2.3_R | chr22:29130324-29130466  | CTGAGGACCAAGAACCCTGAG    |
| CHEK2.8.1.CHEK2.1_F  | chr22:29099425-29099584  | TGAGAAAGGCAAGCCTACAT     |
| CHEK2.8.1.CHEK2.1_R  | chr22:29099425-29099584  | CCTCTTGGGAGTTTCTCACT     |
| CHEK2.1.5.CHEK2.1_F  | chr22:29083881-29084039  | TCTTTCGTGTCAAACCACG      |
| CHEK2.1.5.CHEK2.1_R  | chr22:29083881-29084039  | ACTGGAAGCATATTGAGGAAC    |
| CHEK2.4.3.CHEK2.1_F  | chr22:29091076-29091220  | CACCACAGCACATACATT       |
| CHEK2.4.3.CHEK2.1_R  | chr22:29091076-29091220  | ACCAATATTAAGCCTTAGTGGG   |
| CHEK2.4.4.CHEK2.2_F  | chr22:29091220-29091379  | ATGCTCAGAGAAAGGTGGAT     |
| CHEK2.4.4.CHEK2.2_R  | chr22:29091220-29091379  | GTGCTGGGATTACAAGCCTA     |
| CHEK2.10.1.CHEK2.1_F | chr22:29107891-29108048  | GGTGATCAGCCTTTTATGGT     |

|                       |                         |                            |
|-----------------------|-------------------------|----------------------------|
| CHEK2.10.1.CHEK2.1_R  | chr22:29107891-29108048 | CAGGAGTGGTAGGTCTCATAA      |
| CHEK2.13.1.CHEK2.1_F  | chr22:29121218-29121372 | AGTCTCTCTAGATACATGGGT      |
| CHEK2.13.1.CHEK2.1_R  | chr22:29121218-29121372 | ATTC AACAGCCCTCTGATGC      |
| CHEK2.5.1.CHEK2.1_F   | chr22:29091738-29091879 | TAAACTCCAGCAGTCCACAG       |
| CHEK2.5.1.CHEK2.1_R   | chr22:29091738-29091879 | TGGCAAGTTCAACATTATCCCC     |
| CHEK2.5.2.CHEK2.2_F   | chr22:29091612-29091751 | CAAGATCAAGCCACTGCATG       |
| CHEK2.5.2.CHEK2.2_R   | chr22:29091612-29091751 | CTTGTTTCTGTTGGGACTGC       |
| VKORC1.1.1.VKORC1.1_F | chr16:31102451-31102614 | AGCCTGGCTTGGGTTGA          |
| VKORC1.1.1.VKORC1.1_R | chr16:31102451-31102614 | ATGCTGCTGAGCTCCCT          |
| VKORC1.1.2.VKORC1.2_F | chr16:31102582-31102732 | AGAGCACGAAGAACAGGATC       |
| VKORC1.1.2.VKORC1.2_R | chr16:31102582-31102732 | CTGGCATCTAGGTAGTGCAG       |
| VKORC1.4.1.VKORC1.1_F | chr16:31105888-31106047 | TGCACACCTGGAGGAGA          |
| VKORC1.4.1.VKORC1.1_R | chr16:31105888-31106047 | GGCGGAACCTGGAGATAATG       |
| VKORC1.4.2.VKORC1.2_F | chr16:31106014-31106176 | CGTCAGGCAAAGAGCGA          |
| VKORC1.4.2.VKORC1.2_R | chr16:31106014-31106176 | TGGAACAGCCATTTGGGTC        |
| VKORC1.4.2.VKORC1.3_F | chr16:31105836-31105974 | TAATCATCTGGCATCCTGGC       |
| VKORC1.4.2.VKORC1.3_R | chr16:31105836-31105974 | CTTAGTGCTCTCGCTCTACG       |
| VKORC1.3.1.VKORC1.1_F | chr16:31104641-31104770 | GGAGCCACTCACCTAACAT        |
| VKORC1.3.1.VKORC1.1_R | chr16:31104641-31104770 | GGGTTGACAGTCCCTAACCTG      |
| VKORC1.3.2.VKORC1.2_F | chr16:31104488-31104647 | CCTGTTAGTTACCTCCCCAC       |
| VKORC1.3.2.VKORC1.2_R | chr16:31104488-31104647 | CGGTTGCATCTTCTACACAC       |
| VKORC1.2.1.VKORC1.1_F | chr16:31104082-31104212 | TTTTCCACAAAACCTGGGGTG      |
| VKORC1.2.1.VKORC1.1_R | chr16:31104082-31104212 | CACC ACTATGCCAGCTAAT       |
| MLH1.11.1.MLH1.1_F    | chr3:37061819-37061961  | ACAGTTTAGAAAATCAGTCCCCA    |
| MLH1.11.1.MLH1.1_R    | chr3:37061819-37061961  | AAGTAGCTGGATGAGAAGCG       |
| MLH1.11.2.MLH1.2_F    | chr3:37061702-37061839  | AGGTTTTGACCACTGTGTCA       |
| MLH1.11.2.MLH1.2_R    | chr3:37061702-37061839  | GAACTTCATGCTTTGTGGGG       |
| MLH1.7.1.MLH1.1_F     | chr3:37053266-37053417  | GGGCTCTGACATCTAGTGTG       |
| MLH1.7.1.MLH1.1_R     | chr3:37053266-37053417  | ACCTTATCTCCACCAGCAAA       |
| MLH1.17.1.MLH1.1_F    | chr3:37090006-37090163  | TTGTCCTTTTTCTGCAAGC        |
| MLH1.17.1.MLH1.1_R    | chr3:37090006-37090163  | CCAGATCAAAGGGTGGTCAT       |
| MLH1.2.1.MLH1.1_F     | chr3:37038082-37038238  | ACATTAGAGTAGTTGCAGACTG     |
| MLH1.2.1.MLH1.1_R     | chr3:37038082-37038238  | AGGTCCTGACTCTTCCATGA       |
| MLH1.1.1.1.MLH1.1_F   | chr3:37035026-37035182  | TCTAGACGTTTCTTGGCTC        |
| MLH1.1.1.1.MLH1.1_R   | chr3:37035026-37035182  | CCGTTAAGTCGTAGCCCTTA       |
| MLH1.18.1.MLH1.1_F    | chr3:37090404-37090537  | CTTTGGACCAGGTGAATTGG       |
| MLH1.18.1.MLH1.1_R    | chr3:37090404-37090537  | ATGAGGTCCTGTCTAGTCC        |
| MLH1.18.2.MLH1.2_F    | chr3:37090270-37090426  | AGCAATATTCAGCAGTCCCA       |
| MLH1.18.2.MLH1.2_R    | chr3:37090270-37090426  | CGCATTCCTTACTAGAGGCTT      |
| MLH1.13.1.MLH1.1_F    | chr3:37070291-37070450  | GCAGAAAGAGACATCGGGAA       |
| MLH1.13.1.MLH1.1_R    | chr3:37070291-37070450  | CAGTTGAGGCCCTATGCAT        |
| MLH1.13.2.MLH1.2_F    | chr3:37070191-37070322  | CAGCACAGAGAAGTTGCTTG       |
| MLH1.13.2.MLH1.2_R    | chr3:37070191-37070322  | CTGCAGTCATTTCTTTCCGG       |
| MLH1.16.1.MLH1.1_F    | chr3:37089010-37089169  | TCATGTTCTTGCTTCTTCCCTAG    |
| MLH1.16.1.MLH1.1_R    | chr3:37089010-37089169  | ATGGCTGTCACACCTCAT         |
| MLH1.16.2.MLH1.2_F    | chr3:37089153-37089312  | GCTGAGATGCTTGCAGACTA       |
| MLH1.16.2.MLH1.2_R    | chr3:37089153-37089312  | GGTTTCATCATGTTGGCCAG       |
| MLH1.6.1.MLH1.1_F     | chr3:37050250-37050404  | CTTTTGCCAGGACATCTTGG       |
| MLH1.6.1.MLH1.1_R     | chr3:37050250-37050404  | AGACCCACTCCCAGATTTTG       |
| MLH1.3.6.MLH1.1_F     | chr3:37042415-37042565  | GAGATTTGAAAAATGAGTAACATG   |
| MLH1.3.6.MLH1.1_R     | chr3:37042415-37042565  | CATCACAGGAGGATATTTTACACA   |
| MLH1.9.6.MLH1.1_F     | chr3:37055918-37056054  | TCAAAAAGCTTCAGAATCTCTTTTCT |
| MLH1.9.6.MLH1.1_R     | chr3:37055918-37056054  | CCTGTGAGTGGATTCCCAT        |
| MLH1.12.1.MLH1.1_F    | chr3:37067148-37067311  | CTTTGCTACCAGGACTTGC        |
| MLH1.12.1.MLH1.1_R    | chr3:37067148-37067311  | TGTGACAATGGCCTGGG          |
| MLH1.12.2.MLH1.2_F    | chr3:37067311-37067471  | CAAACCCCTGTCCAGTCAG        |
| MLH1.12.2.MLH1.2_R    | chr3:37067311-37067471  | TGCTGGAAGTAGGTCTCTCTC      |
| MLH1.12.2.MLH1.3_F    | chr3:37067038-37067176  | TAGTACTGCTCCATTTGGGG       |
| MLH1.12.2.MLH1.3_R    | chr3:37067038-37067176  | AGACGAGGTGAGACTTTGTTG      |
| MLH1.12.3.MLH1.4_F    | chr3:37067424-37067580  | GAAGTGGCTGCCAAAAATCA       |
| MLH1.12.3.MLH1.4_R    | chr3:37067424-37067580  | AGGCAGAGAGAAGATGCAAG       |
| MLH1.14.1.MLH1.1_F    | chr3:37081632-37081790  | AATGAAGTGGGGTTGGTAGG       |
| MLH1.14.1.MLH1.1_R    | chr3:37081632-37081790  | TTGTTACACACTCAGCTGA        |
| MLH1.20.1.MLH1.1_F    | chr3:37107060-37107191  | AAACCGATGTGTATAGGCC        |
| MLH1.20.1.MLH1.1_R    | chr3:37107060-37107191  | GCATAAGGGCTGAGACTCAA       |
| MLH1.15.4.MLH1.1_F    | chr3:37083712-37083862  | GTCCCAACTGGTTGTATCTCA      |
| MLH1.15.4.MLH1.1_R    | chr3:37083712-37083862  | GGAGAGCTACTATTTTCAGAAACG   |

|                         |                          |                           |
|-------------------------|--------------------------|---------------------------|
| MLH1.8.5.MLH1.1_F       | chr3:37053492-37053643   | TCCTTGTGCTCTTCTGCTGTT     |
| MLH1.8.5.MLH1.1_R       | chr3:37053492-37053643   | GGTTCCAAAATAATGTGATGGAATG |
| MLH1.4.1.MLH1.1_F       | chr3:37045865-37046014   | ACCCAGCAGTGAGTTTTTCT      |
| MLH1.4.1.MLH1.1_R       | chr3:37045865-37046014   | ACTCTGAGACCTAGGCCAAAA     |
| MLH1.10.1.MLH1.1_F      | chr3:37058971-37059106   | CCCCCTCAGGACAGTTTTGAA     |
| MLH1.10.1.MLH1.1_R      | chr3:37058971-37059106   | TGTGAGTCTTGGTTGAGGAG      |
| MLH1.19.1.MLH1.1_F      | chr3:37091997-37092156   | TGAAGTGCCTGGCTCCAT        |
| MLH1.19.1.MLH1.1_R      | chr3:37091997-37092156   | AACACATCCCACAGTGCAT       |
| MLH1.19.2.MLH1.2_F      | chr3:37092105-37092241   | GGAAATATCCTGCAGCTTGC      |
| MLH1.19.2.MLH1.2_R      | chr3:37092105-37092241   | AGTCTTAAGTGCTACCAACACT    |
| MLH1.19.2.MLH1.3_F      | chr3:37091937-37092084   | GACACCAGTGTATGTTGGGA      |
| MLH1.19.2.MLH1.3_R      | chr3:37091937-37092084   | GCAAGCTGCAGGATATTTC       |
| MLH1.5.1.MLH1.1_F       | chr3:37048431-37048568   | TTTTCTCTTTTCCCCTTGGG      |
| MLH1.5.1.MLH1.1_R       | chr3:37048431-37048568   | GCTTCAACAATTTACTCTCCCA    |
| GATA3.1.6.GATA3.1_F     | chr10:8097629-8097795    | CGAGGCCATGGAGGTGA         |
| GATA3.1.6.GATA3.1_R     | chr10:8097629-8097795    | CGTAGTAGGGCGGGAC          |
| GATA3.1.7.GATA3.2_F     | chr10:8097786-8097941    | GCTTTTAAACATCGACGGTCA     |
| GATA3.1.7.GATA3.2_R     | chr10:8097786-8097941    | CTTTCGCTTGACCTCTCCC       |
| GATA3.1.8.GATA3.3_F     | chr10:8097510-8097670    | CCGAAAGCAAATCATTCAACG     |
| GATA3.1.8.GATA3.3_R     | chr10:8097510-8097670    | TGCTGCCCGTTGAGCA          |
| GATA3.4.1.GATA3.1_F     | chr10:8111433-8111569    | TCFCCTCTCCCCACTCT         |
| GATA3.4.1.GATA3.1_R     | chr10:8111433-8111569    | CTGTTCTTGCTGATCCCAGT      |
| GATA3.3.1.GATA3.1_F     | chr10:8105950-8106102    | GTGGCTTATCTGTGCTTTTGT     |
| GATA3.3.1.GATA3.1_R     | chr10:8105950-8106102    | CATCCCTTCCCAGAACTTA       |
| GATA3.2.1.GATA3.1_F     | chr10:8100307-8100467    | CCTCTGCTTCATGGATCCC       |
| GATA3.2.1.GATA3.1_R     | chr10:8100307-8100467    | AAGGTGAAGAGGTGCGG         |
| GATA3.2.2.GATA3.2_F     | chr10:8100243-8100372    | ACTCACCCCTCTCTCTCTC       |
| GATA3.2.2.GATA3.2_R     | chr10:8100243-8100372    | GATGGACGCTTGGAGAAGG       |
| GATA3.2.3.GATA3.3_F     | chr10:8100596-8100760    | AAGTACCAGGTGCCCT          |
| GATA3.2.3.GATA3.3_R     | chr10:8100596-8100760    | ACTTGCATCCGAAGCCG         |
| GATA3.2.4.GATA3.4_F     | chr10:8100715-8100847    | CTACGTGCCCGAGTACA         |
| GATA3.2.4.GATA3.4_R     | chr10:8100715-8100847    | CCCTGGATTGAGGAAAAGGG      |
| GATA3.2.5.GATA3.5_F     | chr10:8100451-8100604    | CCTCGTCTCTCTCTTGT         |
| GATA3.2.5.GATA3.5_R     | chr10:8100451-8100604    | GGACACTCCAGCTTCATG        |
| GATA3.5.1.GATA3.1_F     | chr10:8115722-8115881    | AGATTAACAGACCCCTGACTAT    |
| GATA3.5.1.GATA3.1_R     | chr10:8115722-8115881    | ATGTGGCTGGAGTGGCT         |
| GATA3.5.2.GATA3.2_F     | chr10:8115865-8116025    | AGACACATGTCCCTCCCTGA      |
| GATA3.5.2.GATA3.2_R     | chr10:8115865-8116025    | AAGTCGAAAGGGACTGCAG       |
| GATA3.5.2.GATA3.3_F     | chr10:8115593-8115722    | GCCAGCTGAAATGGAAACAG      |
| GATA3.5.2.GATA3.3_R     | chr10:8115593-8115722    | GTCTGGATGCCTTCTCTT        |
| PIK3CA.11.9.PIK3CA.1_F  | chr3:178937326-178937481 | CATTCACAACATATCTTTCCCCT   |
| PIK3CA.11.9.PIK3CA.1_R  | chr3:178937326-178937481 | ACTGAGAAAGTTTGTATCTGT     |
| PIK3CA.11.10.PIK3CA.2_F | chr3:178937476-178937603 | CTGTTCCGGTCTTGGAAAAA      |
| PIK3CA.11.10.PIK3CA.2_R | chr3:178937476-178937603 | GCATAAACTAGTTAGTGCACTAGG  |
| PIK3CA.7.1.PIK3CA.1_F   | chr3:178928002-178928161 | TCCATTGGCATGGGGAAATA      |
| PIK3CA.7.1.PIK3CA.1_R   | chr3:178928002-178928161 | AGAGAAGGTTTACTGCCAT       |
| PIK3CA.7.2.PIK3CA.2_F   | chr3:178927920-178928053 | CCTTTTGGGGAAGAAAAGTGT     |
| PIK3CA.7.2.PIK3CA.2_R   | chr3:178927920-178928053 | CATGAGGTACTGGCCAAAGA      |
| PIK3CA.17.1.PIK3CA.1_F  | chr3:178947130-178947289 | GGTGGTGCCGAAATCTCAC       |
| PIK3CA.17.1.PIK3CA.1_R  | chr3:178947130-178947289 | TCAGAGGAATACACAAACACC     |
| PIK3CA.17.2.PIK3CA.2_F  | chr3:178947060-178947194 | AACGTGTACTCCTCTTTCAG      |
| PIK3CA.17.2.PIK3CA.2_R  | chr3:178947060-178947194 | TGCTTTGAGCCACTGATGT       |
| PIK3CA.2.1.PIK3CA.1_F   | chr3:178917577-178917724 | CTGAACGTTTGTAAAGAAGCTG    |
| PIK3CA.2.1.PIK3CA.1_R   | chr3:178917577-178917724 | ACACAGGTAGAAGACTGCAC      |
| PIK3CA.2.8.PIK3CA.2_F   | chr3:178917441-178917585 | ACATGTTTATGCTGTGTATGT     |
| PIK3CA.2.8.PIK3CA.2_R   | chr3:178917441-178917585 | ATGAGGTGAATTGAGGTCCC      |
| PIK3CA.1.1.PIK3CA.1_F   | chr3:178916674-178916833 | ACTTGATGCCCCCAAGAATC      |
| PIK3CA.1.1.PIK3CA.1_R   | chr3:178916674-178916833 | TTCCCTTCTGCTTCTTGAG       |
| PIK3CA.1.2.PIK3CA.2_F   | chr3:178916555-178916711 | TAGGTTTCTGCTTGGGACA       |
| PIK3CA.1.2.PIK3CA.2_R   | chr3:178916555-178916711 | CCTCACGGAGGCATTCTAAA      |
| PIK3CA.1.2.PIK3CA.3_F   | chr3:178916853-178917006 | ACTCAAGAAGCAGAAAAGGGA     |
| PIK3CA.1.2.PIK3CA.3_R   | chr3:178916853-178917006 | GAAAGGGACAACAGTTAAGCT     |
| PIK3CA.1.3.PIK3CA.4_F   | chr3:178916789-178916924 | AGCAAGAAAATACCCCTCC       |
| PIK3CA.1.3.PIK3CA.4_R   | chr3:178916789-178916924 | TTTCTTACCGTTGCCTACT       |
| PIK3CA.18.4.PIK3CA.1_F  | chr3:178947753-178947899 | TCAAGTTGGCCTGAATCACT      |
| PIK3CA.18.4.PIK3CA.1_R  | chr3:178947753-178947899 | GAAAACCATTACTTGTCCATCG    |
| PIK3CA.18.5.PIK3CA.2_F  | chr3:178947878-178948029 | GGGAATTGGAGATCGTCACA      |

|                         |                          |                            |
|-------------------------|--------------------------|----------------------------|
| PIK3CA.18.5.PIK3CA.2_R  | chr3:178947878-178948029 | CTTGTGATCCAAAAAGTGTC       |
| PIK3CA.16.1.PIK3CA.1_F  | chr3:178943710-178943843 | CGTGATCCCCAAATTTGCAT       |
| PIK3CA.16.1.PIK3CA.1_R  | chr3:178943710-178943843 | ACTTTCAACATACAGGTTGCC      |
| PIK3CA.13.1.PIK3CA.1_F  | chr3:178938813-178938970 | ACAGTTAGCCAGAGGTTTGG       |
| PIK3CA.13.1.PIK3CA.1_R  | chr3:178938813-178938970 | CCACTGCAGTGAAAAGAGTC       |
| PIK3CA.13.14.PIK3CA.2_F | chr3:178938620-178938866 | CCTGAAACTCATGGTGGTTTTGT    |
| PIK3CA.13.14.PIK3CA.2_R | chr3:178938620-178938866 | CCATTGCCTCGACTTGCCCTA      |
| PIK3CA.6.13.PIK3CA.1_F  | chr3:178927355-178927498 | CTTTGATGAAGACTTTTCTTGATGT  |
| PIK3CA.6.13.PIK3CA.1_R  | chr3:178927355-178927498 | AGGTAACATAAATGTTCCCTCTGA   |
| PIK3CA.3.1.PIK3CA.1_F   | chr3:178919222-178919374 | ACTCGAAGTATGTTGCTATCCT     |
| PIK3CA.3.1.PIK3CA.1_R   | chr3:178919222-178919374 | ACAGATACTCATCCTCAATGTG     |
| PIK3CA.3.4.PIK3CA.2_F   | chr3:178919060-178919209 | AGAGAGATGGTGATTCGATCT      |
| PIK3CA.3.4.PIK3CA.2_R   | chr3:178919060-178919209 | AGTTGTTTCAGAGGATAGCAACA    |
| PIK3CA.3.5.PIK3CA.3_F   | chr3:178919167-178919309 | TCACCATGACTGTGTACCA        |
| PIK3CA.3.5.PIK3CA.3_R   | chr3:178919167-178919309 | CACCTTATACTGACTCAGAGGA     |
| PIK3CA.9.6.PIK3CA.1_F   | chr3:178935963-178936112 | TCCAGAGGGGAAAAATATGACA     |
| PIK3CA.9.6.PIK3CA.1_R   | chr3:178935963-178936112 | TAGCACTTACCTGTGACTCC       |
| PIK3CA.9.7.PIK3CA.2_F   | chr3:178936050-178936176 | AGGGAAAATGACAAAGAACAGC     |
| PIK3CA.9.7.PIK3CA.2_R   | chr3:178936050-178936176 | CTGAGATCAGCCAAATTCAGT      |
| PIK3CA.12.14.PIK3CA.1_F | chr3:178937712-178937936 | GCCATGCAGAACTGACCCCT       |
| PIK3CA.12.14.PIK3CA.1_R | chr3:178937712-178937936 | GGAAAACCTCTCCAGCCAAACA     |
| PIK3CA.15.11.PIK3CA.1_F | chr3:178942503-178942627 | TTAAAGGCTTGAAGAGTGTCG      |
| PIK3CA.15.11.PIK3CA.1_R | chr3:178942503-178942627 | GCTAAATTCATGCATCATAAGCTC   |
| PIK3CA.15.12.PIK3CA.2_F | chr3:178942473-178942601 | AGCAAAGGTACCTAGTAAAGTTT    |
| PIK3CA.15.12.PIK3CA.2_R | chr3:178942473-178942601 | ACTCTTCCTTACCATCCCCA       |
| PIK3CA.20.1.PIK3CA.1_F  | chr3:178951922-178952081 | CAAGGCTTATCTAGCTATTCGA     |
| PIK3CA.20.1.PIK3CA.1_R  | chr3:178951922-178952081 | TCCAGCCACCATGATGTG         |
| PIK3CA.20.2.PIK3CA.2_F  | chr3:178952061-178952217 | GCAAGAGGCTTTGGAGTATT       |
| PIK3CA.20.2.PIK3CA.2_R  | chr3:178952061-178952217 | CTATGCAATCGGTCTTTGCC       |
| PIK3CA.20.2.PIK3CA.3_F  | chr3:178951796-178951954 | AGCTTTGTCTACGAAAGCCT       |
| PIK3CA.20.2.PIK3CA.3_R  | chr3:178951796-178951954 | ATTCCAGAGCCAAGCATCAT       |
| PIK3CA.14.10.PIK3CA.1_F | chr3:178941854-178941978 | GTCAGTTTCTTACTGTGACTATCC   |
| PIK3CA.14.10.PIK3CA.1_R | chr3:178941854-178941978 | TCATGAAACCCCAAGAAAG        |
| PIK3CA.8.4.PIK3CA.1_F   | chr3:178928184-178928344 | GGCAGTCAAACCTTCTCTCT       |
| PIK3CA.8.4.PIK3CA.1_R   | chr3:178928184-178928344 | TTTGCCTTACCAGTCTGTC        |
| PIK3CA.8.5.PIK3CA.2_F   | chr3:178928303-178928459 | CAGTGATTGAAGAGCATGCC       |
| PIK3CA.8.5.PIK3CA.2_R   | chr3:178928303-178928459 | GCAATATTGGTCCTAGAGTTCA     |
| PIK3CA.4.4.PIK3CA.1_F   | chr3:178921331-178921481 | CGCCCCCTTAATCTCTTACA       |
| PIK3CA.4.4.PIK3CA.1_R   | chr3:178921331-178921481 | CCCAAAGGGATTTTGTAGATGT     |
| PIK3CA.4.8.PIK3CA.2_F   | chr3:178921420-178921577 | TTCTCAACTGCCAATGGACT       |
| PIK3CA.4.8.PIK3CA.2_R   | chr3:178921420-178921577 | AAGCATCAGCATTTGACTTTAC     |
| PIK3CA.19.1.PIK3CA.1_F  | chr3:178948052-178948196 | TGGACACTTTTTGGATCACAAAG    |
| PIK3CA.19.1.PIK3CA.1_R  | chr3:178948052-178948196 | TCTAATAGAGCAGCCAGAATC      |
| PIK3CA.19.2.PIK3CA.2_F  | chr3:178947910-178948067 | TGGTGAAGACGATGGACAA        |
| PIK3CA.19.2.PIK3CA.2_R  | chr3:178947910-178948067 | TGGCACACGTTCTCGTTTAT       |
| PIK3CA.10.11.PIK3CA.1_F | chr3:178936950-178937094 | ACTTTTGAACAGCATGCAA        |
| PIK3CA.10.11.PIK3CA.1_R | chr3:178936950-178937094 | GTGACATACCAATTTGTACAACAG   |
| PIK3CA.5.12.PIK3CA.1_F  | chr3:178922248-178922402 | CGAGTGTGTGCATATGTGTA       |
| PIK3CA.5.12.PIK3CA.1_R  | chr3:178922248-178922402 | TGCTAAACACTAATATAACCTTTGG  |
| TPMT.6.3.TPMT.1_F       | chr6:18143792-18143929   | CTGAGAAAACTTTTGTGGGGA      |
| TPMT.6.3.TPMT.1_R       | chr6:18143792-18143929   | GGGGACACAGTGTAGTTGG        |
| TPMT.6.4.TPMT.2_F       | chr6:18143928-18144078   | TCCCAAGTTCACTGATTTCCA      |
| TPMT.6.4.TPMT.2_R       | chr6:18143928-18144078   | CTGCATGTTCTTTGAAACCCCT     |
| TPMT.3.3.TPMT.1_F       | chr6:18133939-18134094   | TGCAGTATGCTTCCATGAGA       |
| TPMT.3.3.TPMT.1_R       | chr6:18133939-18134094   | GCAGATACAATGTTTCCCTCC      |
| TPMT.3.4.TPMT.2_F       | chr6:18134040-18134197   | ACCCAACAACCTTTACCTGGA      |
| TPMT.3.4.TPMT.2_R       | chr6:18134040-18134197   | AGCGAAAGTAACTTCTGGCT       |
| TPMT.7.5.TPMT.1_F       | chr6:18148021-18148172   | CACCCAAAGAATTCATCATTAAAGGC |
| TPMT.7.5.TPMT.1_R       | chr6:18148021-18148172   | TCACCTACCATACAATTTGTCTT    |
| TPMT.2.1.TPMT.1_F       | chr6:18132292-18132441   | TGCTGGAAATACAGGCATGA       |
| TPMT.2.1.TPMT.1_R       | chr6:18132292-18132441   | AGTACACCTACGTCATTGGA       |
| TPMT.8.1.TPMT.1_F       | chr6:18149237-18149387   | ACTGATGTCCTTGTTCCTGA       |
| TPMT.8.1.TPMT.1_R       | chr6:18149237-18149387   | CGTAGGCACGGAAGACATAT       |
| TPMT.8.2.TPMT.2_F       | chr6:18149078-18149237   | TACATCATGCCACAGATGCA       |
| TPMT.8.2.TPMT.2_R       | chr6:18149078-18149237   | GAACGGCAAGACTGCTTTTC       |
| TPMT.1.6.TPMT.1_F       | chr6:18130877-18131010   | CCTCAAAAACATGTCAGTGTGA     |
| TPMT.1.6.TPMT.1_R       | chr6:18130877-18131010   | CATGTTACTCTTCTTGTTCAGG     |

|                       |                         |                              |
|-----------------------|-------------------------|------------------------------|
| TPMT.1.7.TPMT.2_F     | chr6:18130996-18131153  | TCAACCTTCTCAAGACAACGT        |
| TPMT.1.7.TPMT.2_R     | chr6:18130996-18131153  | GGTCATGAACTCCTGACCTC         |
| TPMT.4.8.TPMT.1_F     | chr6:18139137-18139315  | AGCTGATTTTCTAGAACCAGAA       |
| TPMT.4.8.TPMT.1_R     | chr6:18139137-18139315  | GGGACGCTGCTCATCTTCTT         |
| TPMT.5.1.TPMT.1_F     | chr6:18139865-18140019  | GCCTGGCAAGCATTCAAATT         |
| TPMT.5.1.TPMT.1_R     | chr6:18139865-18140019  | GAAC TTTGCTTTGCTTGGC         |
| BRCA2.11.42.BRCA2.1_F | chr13:32918572-32918813 | TCAAACATTAGGTCAC TATTGTTGT   |
| BRCA2.11.42.BRCA2.1_R | chr13:32918572-32918813 | ACCATACCTATAGAGGGAGAACAGA    |
| BRCA2.21.37.BRCA2.1_F | chr13:32953454-32953602 | ATTCCAATATCTTAAATGGTCACAG    |
| BRCA2.21.37.BRCA2.1_R | chr13:32953454-32953602 | CAATACGCAACTTCCACACG         |
| BRCA2.21.38.BRCA2.2_F | chr13:32953601-32953755 | AGGTTTATCAAGGGATGTCACA       |
| BRCA2.21.38.BRCA2.2_R | chr13:32953601-32953755 | GTAGTGGATTTTGCTTCTCTGA       |
| BRCA2.7.21.BRCA2.1_F  | chr13:32903520-32903664 | TGTGCTTTTGTATGCTGACA         |
| BRCA2.7.21.BRCA2.1_R  | chr13:32903520-32903664 | AGGCATTC CAAAATTGTTAGCA      |
| BRCA2.26.1.BRCA2.1_F  | chr13:32972357-32972518 | CCTTTATCACTTTGTATGGCCA       |
| BRCA2.26.1.BRCA2.1_R  | chr13:32972357-32972518 | TGTGCAGCCGGAGAAA             |
| BRCA2.26.2.BRCA2.2_F  | chr13:32972201-32972357 | GGAGGGAGACTGTGTGTAAT         |
| BRCA2.26.2.BRCA2.2_R  | chr13:32972201-32972357 | GTGTGGAACAGACTTTCCTT         |
| BRCA2.26.2.BRCA2.3_F  | chr13:32972538-32972699 | TCFCCGGCTGCACAGAA            |
| BRCA2.26.2.BRCA2.3_R  | chr13:32972538-32972699 | GTTGAACCAGACAAAAGAGCT        |
| BRCA2.26.3.BRCA2.4_F  | chr13:32972402-32972540 | CTCAGCCAGATGACTCAA           |
| BRCA2.26.3.BRCA2.4_R  | chr13:32972402-32972540 | AACTCCTTGGTGGCTGAAAT         |
| BRCA2.26.3.BRCA2.5_F  | chr13:32972769-32972907 | GAATCCACTAGGACTGCTCC         |
| BRCA2.26.3.BRCA2.5_R  | chr13:32972769-32972907 | ATTGTGCGCTTTGC AAAATGC       |
| BRCA2.26.4.BRCA2.6_F  | chr13:32972686-32972844 | TAGCTGACGAAGAACTTGCA         |
| BRCA2.26.4.BRCA2.6_R  | chr13:32972686-32972844 | TCACATTCTCCGTACTGGC          |
| BRCA2.17.1.BRCA2.1_F  | chr13:32937355-32937515 | AGAAGCAGAAGATCGGCTAT         |
| BRCA2.17.1.BRCA2.1_R  | chr13:32937355-32937515 | AACTGGGCC TTAACAGCAT         |
| BRCA2.17.2.BRCA2.2_F  | chr13:32937281-32937410 | ACAGTGGAA TCTAGAGTCACA       |
| BRCA2.17.2.BRCA2.2_R  | chr13:32937281-32937410 | GCGCTCAATGAAAT TATGTCAG      |
| BRCA2.17.2.BRCA2.3_F  | chr13:32937525-32937682 | AGATGGGTGGTATGCTGTTA         |
| BRCA2.17.2.BRCA2.3_R  | chr13:32937525-32937682 | GACTGATTTTTACCAAGAGTGC       |
| BRCA2.17.3.BRCA2.4_F  | chr13:32937393-32937528 | GGATGACACAGCTGCAAAAA         |
| BRCA2.17.3.BRCA2.4_R  | chr13:32937393-32937528 | AGAGGGGAGGATCTAACTGG         |
| BRCA2.2.1.BRCA2.1_F   | chr13:32893354-32893482 | AACTCCACAAGGAAACCA           |
| BRCA2.2.1.BRCA2.1_R   | chr13:32893354-32893482 | AGTTTGTAGTTCTCC CAGTC        |
| BRCA2.2.2.BRCA2.2_F   | chr13:32893199-32893354 | CTGGTTAAACTAAGGTGGGAT        |
| BRCA2.2.2.BRCA2.2_R   | chr13:32893199-32893354 | GTTGAAGCCAGCTGATTATAAG       |
| BRCA2.22.14.BRCA2.1_F | chr13:32953882-32954038 | GCATCTTCTCATCTTTCTCCA        |
| BRCA2.22.14.BRCA2.1_R | chr13:32953882-32954038 | GGTTTGTACCGGTAGTTGTTG        |
| BRCA2.22.15.BRCA2.2_F | chr13:32954024-32954162 | ACATACAGTTAGCAGCGACA         |
| BRCA2.22.15.BRCA2.2_R | chr13:32954024-32954162 | CCGTGGCTGGTAAATCTGAA         |
| BRCA2.1.16.BRCA2.1_F  | chr13:32890590-32890741 | CAAGCATTGGAGGAATATCGT        |
| BRCA2.1.16.BRCA2.1_R  | chr13:32890590-32890741 | TCTAAGCAACACTGTGACGT         |
| BRCA2.18.42.BRCA2.1_F | chr13:32944554-32944766 | TGTCCAGATTCTGCTAACAGT        |
| BRCA2.18.42.BRCA2.1_R | chr13:32944554-32944766 | GGCAAGAGACCCGAACTCCA         |
| BRCA2.18.43.BRCA2.2_F | chr13:32944470-32944597 | GGCAGTTCTAGAAGAA TGA AA ACTC |
| BRCA2.18.43.BRCA2.2_R | chr13:32944470-32944597 | GCAGAGGAAAAGGTCTAGGG         |
| BRCA2.23.29.BRCA2.1_F | chr13:32954113-32954252 | TGCTTGTAGTTTATGGAATCTCC      |
| BRCA2.23.29.BRCA2.1_R | chr13:32954113-32954252 | TTCACAACAGAAACGACAAATC       |
| BRCA2.23.30.BRCA2.2_F | chr13:32954247-32954406 | ATCTTGTCTGAGGTGGACC          |
| BRCA2.23.30.BRCA2.2_R | chr13:32954247-32954406 | TCAGAGGTTCAAAGAGGCTT         |
| BRCA2.16.23.BRCA2.1_F | chr13:32936698-32936852 | AGGTGTGGATCCAAGCTTA          |
| BRCA2.16.23.BRCA2.1_R | chr13:32936698-32936852 | CCATACTGCCGTATATGATTACG      |
| BRCA2.16.26.BRCA2.2_F | chr13:32936626-32936750 | TTGAATTCAGTATCATCCTATGTGG    |
| BRCA2.16.26.BRCA2.2_R | chr13:32936626-32936750 | GGAAAGGCACATTC CATAGC        |
| BRCA2.13.1.BRCA2.1_F  | chr13:32929027-32929187 | AGGAACGTC AAGAGATACAGA       |
| BRCA2.13.1.BRCA2.1_R  | chr13:32929027-32929187 | GACTTTGGTTGGTCTGCC           |
| BRCA2.13.2.BRCA2.2_F  | chr13:32928881-32929039 | TGGCAACCATGGTGAA TACA        |
| BRCA2.13.2.BRCA2.2_R  | chr13:32928881-32929039 | GAAATCTTGAC CAGGTGCG         |
| BRCA2.13.16.BRCA2.3_F | chr13:32929208-32929367 | GGCAGACCAACCAAGTCTT          |
| BRCA2.13.16.BRCA2.3_R | chr13:32929208-32929367 | ACTGCTTGATTGGAGTTGTT         |
| BRCA2.13.17.BRCA2.4_F | chr13:32929135-32929272 | AGCAGTTTCAGGACATCCAT         |
| BRCA2.13.17.BRCA2.4_R | chr13:32929135-32929272 | GCTTTTGTCTGTTTCTCTCCA        |
| BRCA2.13.22.BRCA2.5_F | chr13:32929295-32929439 | GGAGGAAAACAGACAAAAGCA        |
| BRCA2.13.22.BRCA2.5_R | chr13:32929295-32929439 | AGGC AAAAATTCATCACACAAA      |
| BRCA2.25.1.BRCA2.1_F  | chr13:32971063-32971215 | GACATACTTTGCAATGAAGCAG       |

|                       |                         |                           |
|-----------------------|-------------------------|---------------------------|
| BRCA2.25.1.BRCA2.1_R  | chr13:32971063-32971215 | ACGATGGCCTCCATATATACT     |
| BRCA2.25.2.BRCA2.2_F  | chr13:32970957-32971107 | GGTCCAAACTTTTCATTCTGCG    |
| BRCA2.25.2.BRCA2.2_R  | chr13:32970957-32971107 | ACAGTCTTTAGTTGGGGTGG      |
| BRCA2.6.1.BRCA2.1_F   | chr13:32900640-32900773 | TTTTCTTTCCTCCAGGGTC       |
| BRCA2.6.1.BRCA2.1_R   | chr13:32900640-32900773 | ACCTCATCTGCTCTTTCTTGT     |
| BRCA2.6.2.BRCA2.2_F   | chr13:32900534-32900673 | AGCATTCTGCCTCATAACAGG     |
| BRCA2.6.2.BRCA2.2_R   | chr13:32900534-32900673 | TATCAGGATCCACCTCAGCT      |
| BRCA2.3.42.BRCA2.1_F  | chr13:32899166-32899418 | AAACACTTCCAAGAATGCAAATTT  |
| BRCA2.3.42.BRCA2.1_R  | chr13:32899166-32899418 | GATCTTCTACCAGGCTCTTAGC    |
| BRCA2.9.1.BRCA2.1_F   | chr13:32906629-32906788 | ATTTTCCATGAAGCAAACGC      |
| BRCA2.9.1.BRCA2.1_R   | chr13:32906629-32906788 | AGTTGAGACCATTACAGGC       |
| BRCA2.9.2.BRCA2.2_F   | chr13:32907089-32907248 | AGCAGGCAATATCTGGAAC       |
| BRCA2.9.2.BRCA2.2_R   | chr13:32907089-32907248 | GTCTCCTTCTGTGAGCAA        |
| BRCA2.9.3.BRCA2.3_F   | chr13:32906959-32907095 | TCAGAGAATTCTTGCCACG       |
| BRCA2.9.3.BRCA2.3_R   | chr13:32906959-32907095 | ACCCTGAAATGAAGAAGCCA      |
| BRCA2.9.4.BRCA2.4_F   | chr13:32906835-32906985 | TTCAGGTCTAAATGGAGCCC      |
| BRCA2.9.4.BRCA2.4_R   | chr13:32906835-32906985 | CACTGTTTCTCATTTAATGGC     |
| BRCA2.9.5.BRCA2.5_F   | chr13:32906785-32906939 | TCCAAGGAAGTTGTACCGTC      |
| BRCA2.9.5.BRCA2.5_R   | chr13:32906785-32906939 | ACGTGGCAAAGAATTCTCTG      |
| BRCA2.9.18.BRCA2.6_F  | chr13:32907269-32907429 | TGCTCACAGAAGGAGGAC        |
| BRCA2.9.18.BRCA2.6_R  | chr13:32907269-32907429 | TCTGATTTTGGTCTTTTCGGT     |
| BRCA2.9.19.BRCA2.7_F  | chr13:32907197-32907330 | TCAGGTCATATGACTGATCCA     |
| BRCA2.9.19.BRCA2.7_R  | chr13:32907197-32907330 | AACCTGCATTCTTCAAAGCT      |
| BRCA2.9.23.BRCA2.8_F  | chr13:32906529-32906670 | GAAACAGTTGTAGATACCTCTGAAG |
| BRCA2.9.23.BRCA2.8_R  | chr13:32906529-32906670 | GGTTCCACTTCAGATACAAATGAG  |
| BRCA2.9.26.BRCA2.9_F  | chr13:32906429-32906580 | AGGATTTGGAAAAACATCAGGG    |
| BRCA2.9.26.BRCA2.9_R  | chr13:32906429-32906580 | TCCTAGTCTTGCTAGTTCTTACT   |
| BRCA2.9.27.BRCA2.10_F | chr13:32906283-32906439 | GCCAAGTACTCAGAATAACCC     |
| BRCA2.9.27.BRCA2.10_R | chr13:32906283-32906439 | GTGGTCTTTGCAGCTATTACT     |
| BRCA2.9.42.BRCA2.11_F | chr13:32907327-32907569 | AGCCACCACCACAGAATT        |
| BRCA2.9.42.BRCA2.11_R | chr13:32907327-32907569 | AACACAGAAGGAATCGTCATCT    |
| BRCA2.12.42.BRCA2.1_F | chr13:32920859-32921066 | TGAGCATCTGTTACATTCCTGA    |
| BRCA2.12.42.BRCA2.1_R | chr13:32920859-32921066 | AAAAACGAGACTTTTCTCATACTGT |
| BRCA2.20.29.BRCA2.1_F | chr13:32950760-32950908 | GCTTGGTTCTTTAGTTTTAGTTGC  |
| BRCA2.20.29.BRCA2.1_R | chr13:32950760-32950908 | CTCAAGGTAAGCTGGGTCTG      |
| BRCA2.20.30.BRCA2.2_F | chr13:32950850-32950988 | CCATCAGCTGCACCTAACAAAG    |
| BRCA2.20.30.BRCA2.2_R | chr13:32950850-32950988 | TGTGATGGCCAGAGAGTCTA      |
| BRCA2.15.1.BRCA2.1_F  | chr13:32931952-32932107 | GCAGAGTCTTTTCAGTTTCA      |
| BRCA2.15.1.BRCA2.1_R  | chr13:32931952-32932107 | GAGAAGAAAGAGGGATGAGGG     |
| BRCA2.15.42.BRCA2.2_F | chr13:32931805-32931999 | TTTGGTAAATTCAGTTTTGGTTTGT |
| BRCA2.15.42.BRCA2.2_R | chr13:32931805-32931999 | CCATCCACCATCAGCCAACT      |
| BRCA2.14.1.BRCA2.1_F  | chr13:32930610-32930765 | GCCAGAGATATACAGGATATGC    |
| BRCA2.14.1.BRCA2.1_R  | chr13:32930610-32930765 | CTCTGTCATAAAAGCCATCAGT    |
| BRCA2.14.2.BRCA2.2_F  | chr13:32930525-32930678 | CCAGGGTTGTGCTTTTTTAA      |
| BRCA2.14.2.BRCA2.2_R  | chr13:32930525-32930678 | CAGAGAGATTCGAGGCAGAG      |
| BRCA2.8.14.BRCA2.1_F  | chr13:32905011-32905157 | GGGGACTACTACTATATGTGC     |
| BRCA2.8.14.BRCA2.1_R  | chr13:32905011-32905157 | AGAGGACTTACCATGACTTGC     |
| BRCA2.8.15.BRCA2.2_F  | chr13:32905136-32905292 | GCTTCTGTGACAGACAGTGA      |
| BRCA2.8.15.BRCA2.2_R  | chr13:32905136-32905292 | TGAGGCAGGATCGCTTGA        |
| BRCA2.4.18.BRCA2.1_F  | chr13:32900229-32900374 | ACCTAAGGGATTTGCTTTGTT     |
| BRCA2.4.18.BRCA2.1_R  | chr13:32900229-32900374 | AAACTCCACATACCCTGG        |
| BRCA2.24.1.BRCA2.1_F  | chr13:32968846-32969005 | ACTTGCCCCCTTCGTCTAT       |
| BRCA2.24.1.BRCA2.1_R  | chr13:32968846-32969005 | CCTCTTTTGGACTAGCAGAAA     |
| BRCA2.24.2.BRCA2.2_F  | chr13:32968935-32969086 | AGCCTCATATGTTAATTGCTGC    |
| BRCA2.24.2.BRCA2.2_R  | chr13:32968935-32969086 | ACCAAATGTGTGGTGATGC       |
| BRCA2.24.18.BRCA2.3_F | chr13:32968701-32968853 | GCTTTCGCCAAATTCAGCTA      |
| BRCA2.24.18.BRCA2.3_R | chr13:32968701-32968853 | TGCCAGTAAATTTGAACATTCCG   |
| BRCA2.19.44.BRCA2.1_F | chr13:32945038-32945217 | CTGTGCCTGGCCTGATACAA      |
| BRCA2.19.44.BRCA2.1_R | chr13:32945038-32945217 | ATTTTACCTTCATGTTCTCAAATCC |
| BRCA2.19.45.BRCA2.2_F | chr13:32945187-32945403 | TGTGGAGGCCCAACAAAAGA      |
| BRCA2.19.45.BRCA2.2_R | chr13:32945187-32945403 | CCTGATATTCTGTCCCTTGTTC    |
| BRCA2.10.1.BRCA2.1_F  | chr13:32910710-32910872 | TGGCTGCAGCATGTCAC         |
| BRCA2.10.1.BRCA2.1_R  | chr13:32910710-32910872 | ACCTTTGAGCTTGTCTGACA      |
| BRCA2.10.2.BRCA2.2_F  | chr13:32911303-32911463 | TGGAGACACAGGTGATAAACA     |
| BRCA2.10.2.BRCA2.2_R  | chr13:32911303-32911463 | AGAGTCTGCCCATTTGT         |
| BRCA2.10.3.BRCA2.3_F  | chr13:32911824-32911983 | CCTAGCCAAAAGGCAGAAA       |
| BRCA2.10.3.BRCA2.3_R  | chr13:32911824-32911983 | GGGGCATTTCATTATGACATGA    |

|                        |                         |                           |
|------------------------|-------------------------|---------------------------|
| BRCA2.10.4.BRCA2.4_F   | chr13:32912014-32912175 | GAATGCCCCATCGATTGG        |
| BRCA2.10.4.BRCA2.4_R   | chr13:32912014-32912175 | GCAGAGCTTCAGTAGAAAACA     |
| BRCA2.10.5.BRCA2.5_F   | chr13:32911938-32912068 | TGAAGTGCCGAAAACCAGA       |
| BRCA2.10.5.BRCA2.5_R   | chr13:32911938-32912068 | TCATTTTTCACAGGCCAGC       |
| BRCA2.10.5.BRCA2.6_F   | chr13:32912616-32912775 | TTATCTGGCCAGTTTATGAAGG    |
| BRCA2.10.5.BRCA2.6_R   | chr13:32912616-32912775 | TTCCCACTTGCAGTCTGA        |
| BRCA2.10.6.BRCA2.7_F   | chr13:32913036-32913195 | CAACCCGAACTGATGAAA        |
| BRCA2.10.6.BRCA2.7_R   | chr13:32913036-32913195 | TCTTTACAGGCCTCTCTGTAC     |
| BRCA2.10.7.BRCA2.8_F   | chr13:32913266-32913428 | CAGCTGCCCCAAAGTGT         |
| BRCA2.10.7.BRCA2.8_R   | chr13:32913266-32913428 | TGCAGGACTTTTTGCTGTTT      |
| BRCA2.10.8.BRCA2.9_F   | chr13:32913189-32913321 | TAGCCATCAATGGGCAAAGA      |
| BRCA2.10.8.BRCA2.9_R   | chr13:32913189-32913321 | TTAAGAGCTTAGGTGGCACC      |
| BRCA2.10.8.BRCA2.10_F  | chr13:32914399-32914558 | AGGGAAGCTTCATAAGTCAGT     |
| BRCA2.10.8.BRCA2.10_R  | chr13:32914399-32914558 | CTTCTCTGTGAGCTGGTC        |
| BRCA2.10.9.BRCA2.11_F  | chr13:32915218-32915345 | TGGAAGATGATGAACTGACAGA    |
| BRCA2.10.9.BRCA2.11_R  | chr13:32915218-32915345 | TGGCAACACGAAAGGTAAAA      |
| BRCA2.10.9.BRCA2.12_F  | chr13:32914276-32914426 | TGCTGACATTCAGAGTGAAGA     |
| BRCA2.10.9.BRCA2.12_R  | chr13:32914276-32914426 | GATTTTCCACTTGTCTGTCT      |
| BRCA2.10.10.BRCA2.13_F | chr13:32915062-32915219 | CAGGCTTCACCTAAAAACGT      |
| BRCA2.10.10.BRCA2.13_R | chr13:32915062-32915219 | GGCATGACTTGGCAGTTTAG      |
| BRCA2.10.10.BRCA2.14_F | chr13:32914167-32914298 | GCCAAACGAAAATTATGGCAG     |
| BRCA2.10.10.BRCA2.14_R | chr13:32914167-32914298 | GAAACTTTCTCCAATCCAGACA    |
| BRCA2.10.11.BRCA2.15_F | chr13:32914018-32914172 | AATTTTGAGGTAGGGCCACC      |
| BRCA2.10.11.BRCA2.15_R | chr13:32914018-32914172 | TGAATCATCCAATGCCTCGT      |
| BRCA2.10.12.BRCA2.16_F | chr13:32913899-32914029 | TGCAAATGCATACCCACAA       |
| BRCA2.10.12.BRCA2.16_R | chr13:32913899-32914029 | CAAACGATTTTACCACCTGGCT    |
| BRCA2.10.13.BRCA2.17_F | chr13:32913754-32913907 | ACAGCTATTCTACCATTCTGA     |
| BRCA2.10.13.BRCA2.17_R | chr13:32913754-32913907 | GTTCCTCAACGAAATATCTTC     |
| BRCA2.10.14.BRCA2.18_F | chr13:32910857-32911012 | CCTAGTCATGATTCTAGAGGC     |
| BRCA2.10.14.BRCA2.18_R | chr13:32910857-32911012 | TCTTGAAGGTGATGCTACTCT     |
| BRCA2.10.14.BRCA2.19_F | chr13:32914531-32914671 | ACCAAGCAAGTCTTTTCCAA      |
| BRCA2.10.14.BRCA2.19_R | chr13:32914531-32914671 | AAACTTGCTTTCCACTTGCT      |
| BRCA2.10.18.BRCA2.20_F | chr13:32911691-32911847 | AGCAAGCCTCAGTCAATTAAT     |
| BRCA2.10.18.BRCA2.20_R | chr13:32911691-32911847 | TCAAACCTGACTTCTGATTCTT    |
| BRCA2.10.18.BRCA2.21_F | chr13:32912516-32912658 | AGAATTTGATGGCAGTGATTCA    |
| BRCA2.10.18.BRCA2.21_R | chr13:32912516-32912658 | GAGCTTCGCAACTTCCAAA       |
| BRCA2.10.19.BRCA2.22_F | chr13:32911558-32911697 | AGGAAATCAAGCTCTCTGAACA    |
| BRCA2.10.19.BRCA2.22_R | chr13:32911558-32911697 | ACACTACTCTGTAATGTGCAG     |
| BRCA2.10.19.BRCA2.23_F | chr13:32912412-32912542 | TGACTACTGGCACTTTTGTGG     |
| BRCA2.10.19.BRCA2.23_R | chr13:32912412-32912542 | AGCAAGTCCGTTTCATCTTT      |
| BRCA2.10.20.BRCA2.24_F | chr13:32914667-32914822 | TTCATCTGCTTTCTCTGGATT     |
| BRCA2.10.20.BRCA2.24_R | chr13:32914667-32914822 | CAGTGTCTGGGTTTCTCTT       |
| BRCA2.10.23.BRCA2.25_F | chr13:32911187-32911338 | GTCTTCCAAGTAGCTAATGAAAGG  |
| BRCA2.10.23.BRCA2.25_R | chr13:32911187-32911338 | TGTTCTCCTCTGCAAGAACA      |
| BRCA2.10.24.BRCA2.26_F | chr13:32911058-32911210 | GGTACAATTCAACCAAAACACA    |
| BRCA2.10.24.BRCA2.26_R | chr13:32911058-32911210 | AGTCTGTTTCATGAAGTTCCTT    |
| BRCA2.10.25.BRCA2.27_F | chr13:32910954-32911111 | CCCATGGAAAAGAAATCAAGATG   |
| BRCA2.10.25.BRCA2.27_R | chr13:32910954-32911111 | TCAGAGTCTGGATTGACAGT      |
| BRCA2.10.26.BRCA2.28_F | chr13:32914927-32915081 | TGAAGGTGGTTCTTCAGAAAA     |
| BRCA2.10.26.BRCA2.28_R | chr13:32914927-32915081 | CAGGAACATCAGAAAAAGTTTCAG  |
| BRCA2.10.28.BRCA2.29_F | chr13:32914821-32914968 | GTATCAAAAATACTTCTCGTGTG   |
| BRCA2.10.28.BRCA2.29_R | chr13:32914821-32914968 | ACCAACTGTTGTTTGTCTTGT     |
| BRCA2.10.31.BRCA2.30_F | chr13:32910565-32910709 | CTCAGGATCTTGATTATAAAGAAGC |
| BRCA2.10.31.BRCA2.30_R | chr13:32910565-32910709 | TCCACTTTTGAATGTTGTAAGG    |
| BRCA2.10.32.BRCA2.31_F | chr13:32910441-32910598 | GTGAAAAGAAGCTGTTACAGA     |
| BRCA2.10.32.BRCA2.31_R | chr13:32910441-32910598 | AGAGAATCAGCTTCTGGGGT      |
| BRCA2.10.33.BRCA2.32_F | chr13:32910327-32910473 | TGTGCCCAAACTACCTTT        |
| BRCA2.10.33.BRCA2.32_R | chr13:32910327-32910473 | TCAGAAATTGTCCTAAAAGAGC    |
| BRCA2.10.34.BRCA2.33_F | chr13:32911426-32911566 | AAAATCGGACATCTCCTTGAA     |
| BRCA2.10.34.BRCA2.33_R | chr13:32911426-32911566 | TCTTTGAAGAACATTTTGTCTTC   |
| BRCA2.10.34.BRCA2.34_F | chr13:32912299-32912449 | CTTCAAGTAAATGTCATGATCTGT  |
| BRCA2.10.34.BRCA2.34_R | chr13:32912299-32912449 | GGCAGCAGTATATTTGTTATCTTC  |
| BRCA2.10.34.BRCA2.35_F | chr13:32912922-32913060 | GACATAAGAAGAACAATAAGGACA  |
| BRCA2.10.34.BRCA2.35_R | chr13:32912922-32913060 | TCCCCGTAGCTGTATGAAAA      |
| BRCA2.10.35.BRCA2.36_F | chr13:32912811-32912966 | GGGAAAAATATTAGTGTGCCA     |
| BRCA2.10.35.BRCA2.36_R | chr13:32912811-32912966 | ACCAACTGGGACACTTTCTT      |
| BRCA2.10.36.BRCA2.37_F | chr13:32912696-32912842 | CTCAAGAAGCATGTCATGGT      |

|                        |                         |                             |
|------------------------|-------------------------|-----------------------------|
| BRCA2.10.36.BRCA2.37_R | chr13:32912696-32912842 | GCAATTCTTCTGGTTTCTGATC      |
| BRCA2.10.37.BRCA2.38_F | chr13:32913382-32913533 | GACAAACTGAAATCTCAAACATC     |
| BRCA2.10.37.BRCA2.38_R | chr13:32913382-32913533 | TTCAGTAAATGAAGTCTGACTCA     |
| BRCA2.10.39.BRCA2.39_F | chr13:32913516-32913671 | GCCTTAGCTTTTTACACAAGTT      |
| BRCA2.10.39.BRCA2.39_R | chr13:32913516-32913671 | TCGGAGAGATGATTTTTGTTCAT     |
| BRCA2.10.40.BRCA2.40_F | chr13:32912146-32912284 | AATGAAGTGGGGTTTAGGGG        |
| BRCA2.10.40.BRCA2.40_R | chr13:32912146-32912284 | CATTTGAAACAACAGAAATCATGACA  |
| BRCA2.10.41.BRCA2.41_F | chr13:32912256-32912395 | TGAGGAAACTTCTGCAGAGG        |
| BRCA2.10.41.BRCA2.41_R | chr13:32912256-32912395 | TCTTCAACAAAAGTGCCAGT        |
| BRCA2.10.42.BRCA2.42_F | chr13:32913548-32913792 | AAACTTCTGTGAGTCAGACTTCA     |
| BRCA2.10.42.BRCA2.42_R | chr13:32913548-32913792 | ACTGGCTCAATACCAGAATCAAGT    |
| BRCA2.5.34.BRCA2.1_F   | chr13:32900308-32900455 | GTCAGGTATGATTA AAAAACAATGCT |
| BRCA2.5.34.BRCA2.1_R   | chr13:32900308-32900455 | ACGCTATTGTCAAATCTCAATT      |
| ALK.11.1.ALK.1_F       | chr2:29448287-29448446  | GACACTATTTCAGTCTCCTGCCT     |
| ALK.11.1.ALK.1_R       | chr2:29448287-29448446  | TGGTTGTCAATACCCAGTG         |
| ALK.21.1.ALK.1_F       | chr2:29519754-29519913  | GGGAGATGCATAGAGCCTAC        |
| ALK.21.1.ALK.1_R       | chr2:29519754-29519913  | CCTCACAGCTCCGAATGT          |
| ALK.21.2.ALK.2_F       | chr2:29519908-29520062  | CCTCAAGACTCCACGAATGA        |
| ALK.21.2.ALK.2_R       | chr2:29519908-29520062  | AAAGCCTCTTGGTGAGACAG        |
| ALK.7.1.ALK.1_F        | chr2:29443560-29443706  | AACAACCTGCAGCAAAGACTG       |
| ALK.7.1.ALK.1_R        | chr2:29443560-29443706  | GGTTACATCCCTCTCTGCTC        |
| ALK.26.1.ALK.1_F       | chr2:29754781-29754940  | TTGGACATGGAGAAGTACTTAC      |
| ALK.26.1.ALK.1_R       | chr2:29754781-29754940  | CAGCTGACTCCAAGCACA          |
| ALK.26.2.ALK.2_F       | chr2:29754865-29755016  | GGGCAATGTACCTTCCAGAG        |
| ALK.26.2.ALK.2_R       | chr2:29754865-29755016  | CTGCTGGTCTTACCTGAACA        |
| ALK.2.1.ALK.1_F        | chr2:29419630-29419780  | TGTTGACCAAAGGGAGAAAATG      |
| ALK.2.1.ALK.1_R        | chr2:29419630-29419780  | CCTGGGGCTGGAAGAAAATA        |
| ALK.17.1.ALK.1_F       | chr2:29462545-29462698  | CCTGCTCTGGGCACTTA           |
| ALK.17.1.ALK.1_R       | chr2:29462545-29462698  | AACGTTCTTTGTCCCATGTC        |
| ALK.22.1.ALK.1_F       | chr2:29541134-29541290  | GAAGTGACAAGAGGTGGGAG        |
| ALK.22.1.ALK.1_R       | chr2:29541134-29541290  | CTGATAATGGCGTCTTGTG         |
| ALK.1.1.ALK.1_F        | chr2:29416088-29416250  | AGTGAGTGTGCGACCGA           |
| ALK.1.1.ALK.1_R        | chr2:29416088-29416250  | GCTGACTGCCAATATGAAGG        |
| ALK.1.2.ALK.2_F        | chr2:29416251-29416411  | AGCCTGAACAGAGGTACCT         |
| ALK.1.2.ALK.2_R        | chr2:29416251-29416411  | GGCTCCTGGTTTACAGAGAA        |
| ALK.1.3.ALK.3_F        | chr2:29416420-29416581  | TTTTTGGTGGGTTTCTCTGT        |
| ALK.1.3.ALK.3_R        | chr2:29416420-29416581  | GCTGCAAAGAAACCCACA          |
| ALK.1.4.ALK.4_F        | chr2:29416390-29416519  | TGTGGCTCCTTCTTTGCTAT        |
| ALK.1.4.ALK.4_R        | chr2:29416390-29416519  | GAAGGGGACACGTGAATAT         |
| ALK.1.4.ALK.5_F        | chr2:29416591-29416751  | CCTGCGAGCTGTGGGTTT          |
| ALK.1.4.ALK.5_R        | chr2:29416591-29416751  | ACCGCTTTGCCGATAGAAT         |
| ALK.1.5.ALK.6_F        | chr2:29416735-29416877  | ACAGGCACTTTCTCTCCTC         |
| ALK.1.5.ALK.6_R        | chr2:29416735-29416877  | CTGGTTTCCATCTGTAGAAAT       |
| ALK.1.5.ALK.7_F        | chr2:29416539-29416668  | CATATTCACGTGTCCCCCTT        |
| ALK.1.5.ALK.7_R        | chr2:29416539-29416668  | CTCCTCTCCTGGTCTCTCAA        |
| ALK.18.1.ALK.1_F       | chr2:29473970-29474131  | CCCTCTTCCATACGCA            |
| ALK.18.1.ALK.1_R       | chr2:29473970-29474131  | CTCCTCTTGTGCCACAGTT         |
| ALK.18.2.ALK.2_F       | chr2:29474065-29474202  | CAGGTTGGAGTTCTGGTAGG        |
| ALK.18.2.ALK.2_R       | chr2:29474065-29474202  | GAGCAGATATCTCAGAGGCC        |
| ALK.13.1.ALK.1_F       | chr2:29450411-29450541  | GGAGGACTGACCTAAGCAAG        |
| ALK.13.1.ALK.1_R       | chr2:29450411-29450541  | CTCTGCTCTGGTTTGTCTACT       |
| ALK.23.1.ALK.1_F       | chr2:29543616-29543765  | AAGGCAGGAGAGCAGTAGTA        |
| ALK.23.1.ALK.1_R       | chr2:29543616-29543765  | TCCTGAAAAATGATGGTGCCT       |
| ALK.16.1.ALK.1_F       | chr2:29456415-29456574  | AGGAACCTGGTGGAAATCTG        |
| ALK.16.1.ALK.1_R       | chr2:29456415-29456574  | CCACAAACCTAACGTGCTTT        |
| ALK.29.1.ALK.1_F       | chr2:30143118-30143283  | ACCAACTGCTTGGCACG           |
| ALK.29.1.ALK.1_R       | chr2:30143118-30143283  | TCCTCCTCGGAGCTGAA           |
| ALK.29.2.ALK.2_F       | chr2:30143374-30143532  | AGTCAACTGCCAGACTCTTC        |
| ALK.29.2.ALK.2_R       | chr2:30143374-30143532  | CAGTGTAACGGCTCCTC           |
| ALK.29.2.ALK.3_F       | chr2:30142983-30143141  | ATCCTCAGTCGCCCTTC           |
| ALK.29.2.ALK.3_R       | chr2:30142983-30143141  | TGTCCAGGGTGTCTGAAG          |
| ALK.29.3.ALK.4_F       | chr2:30142839-30142991  | AAACACTAAATCCCGGCACA        |
| ALK.29.3.ALK.4_R       | chr2:30142839-30142991  | AGCTGTTCAAGTTGGTGGATT       |
| ALK.29.6.ALK.5_F       | chr2:30143235-30143384  | CCCAGCAACCTGAGCAG           |
| ALK.29.6.ALK.5_R       | chr2:30143235-30143384  | GAGCCACTCAGCTACTCG          |
| ALK.27.1.ALK.1_F       | chr2:29917721-29917880  | AGCCTCTCCCTTACCTCTG         |
| ALK.27.1.ALK.1_R       | chr2:29917721-29917880  | GACCCTTGGCTATTATTGCAG       |



|                    |                        |                        |
|--------------------|------------------------|------------------------|
| ALK.27.2.ALK.2_F   | chr2:29917591-29917721 | AAGCCATGGAAAGTCACAGA   |
| ALK.27.2.ALK.2_R   | chr2:29917591-29917721 | AGAGCGTTCTAAGGAGATGC   |
| ALK.25.1.ALK.1_F   | chr2:29606575-29606725 | ACAATAGGCTACCAAGGAGC   |
| ALK.25.1.ALK.1_R   | chr2:29606575-29606725 | TCTGTTTTCCAATGCAACCGA  |
| ALK.6.1.ALK.1_F    | chr2:29436838-29436976 | ATGACAGGAAGAGCACAGTC   |
| ALK.6.1.ALK.1_R    | chr2:29436838-29436976 | CTCTCACTGACAAGCTCCTC   |
| ALK.28.1.ALK.1_F   | chr2:29940457-29940597 | TACTTACCATATCGGCTGCG   |
| ALK.28.1.ALK.1_R   | chr2:29940457-29940597 | TAAAAGACACCCCAAGCA     |
| ALK.28.2.ALK.2_F   | chr2:29940317-29940460 | GAGACAGAGGGCTCAGAAAG   |
| ALK.28.2.ALK.2_R   | chr2:29940317-29940460 | GACTCCTTCCCTTTCCTGTGTC |
| ALK.3.1.ALK.1_F    | chr2:29420395-29420551 | AGTAACTAGCAGAAGTGTCCCT |
| ALK.3.1.ALK.1_R    | chr2:29420395-29420551 | CATCTCCATGTCCCTCTGTCC  |
| ALK.9.1.ALK.1_F    | chr2:29445380-29445514 | CTCAAGAGTGAGCCACTTCT   |
| ALK.9.1.ALK.1_R    | chr2:29445380-29445514 | CAGCTGCCTCATTATTGTGG   |
| ALK.12.1.ALK.1_F   | chr2:29449798-29449941 | CCCCCTTACCAATGCAGGA    |
| ALK.12.1.ALK.1_R   | chr2:29449798-29449941 | CCGTCCCTCCTTGTCACTA    |
| ALK.12.2.ALK.2_F   | chr2:29449683-29449827 | TAGGGGAGGGACAGAAAGTT   |
| ALK.12.2.ALK.2_R   | chr2:29449683-29449827 | AGGTCATCTGCTTCTGTGAC   |
| ALK.20.1.ALK.1_F   | chr2:29498268-29498401 | GGGGTCAGAGTGAACCTCAC   |
| ALK.20.1.ALK.1_R   | chr2:29498268-29498401 | AATCCTAAGACAAGACCCCC   |
| ALK.15.1.ALK.1_F   | chr2:29455173-29455333 | CTPGCAGCGCTTTACCTG     |
| ALK.15.1.ALK.1_R   | chr2:29455173-29455333 | AGCTCGGTTTCTCAATGTCT   |
| ALK.15.2.ALK.2_F   | chr2:29455047-29455188 | TCCCTGGATATCGGTACCAA   |
| ALK.15.2.ALK.2_R   | chr2:29455047-29455188 | CCTCGGTTCTAGGGCTAAAC   |
| ALK.14.1.ALK.1_F   | chr2:29451772-29451932 | ATATATCCTCCGCCTCCTCC   |
| ALK.14.1.ALK.1_R   | chr2:29451772-29451932 | TCCCTATCTTCCCGCAG      |
| ALK.14.2.ALK.2_F   | chr2:29451740-29451890 | AGTGACACCTTGAACACGAA   |
| ALK.14.2.ALK.2_R   | chr2:29451740-29451890 | TAACACTTCCTTGCTCTGGG   |
| ALK.8.1.ALK.1_F    | chr2:29445209-29445363 | GGTGTCTCTGTGGCTTTA     |
| ALK.8.1.ALK.1_R    | chr2:29445209-29445363 | GGTAAGAAGTGGCTCACTCT   |
| ALK.4.1.ALK.1_F    | chr2:29430029-29430163 | GATACCTGGAGGATGATGGC   |
| ALK.4.1.ALK.1_R    | chr2:29430029-29430163 | TGCCATCTCCAGATCCCTAGT  |
| ALK.24.1.ALK.1_F   | chr2:29551215-29551355 | GCAGCCCCATCTACTCA      |
| ALK.24.1.ALK.1_R   | chr2:29551215-29551355 | CATGGTTGTGTCTGTGTG     |
| ALK.19.1.ALK.1_F   | chr2:29497961-29498096 | CACATTTGTGAGCTGAACCC   |
| ALK.19.1.ALK.1_R   | chr2:29497961-29498096 | CCGTGGGGTCTTCTCTATTG   |
| ALK.10.1.ALK.1_F   | chr2:29446227-29446389 | CCGAATGAGGGTGATGTTTT   |
| ALK.10.1.ALK.1_R   | chr2:29446227-29446389 | ACCCACCTGCAGTGTAC      |
| ALK.10.2.ALK.2_F   | chr2:29446293-29446447 | AAAGCAGTAGTTGGGGTTGT   |
| ALK.10.2.ALK.2_R   | chr2:29446293-29446447 | GTAGGAAGTGGCCTGTGTAG   |
| ALK.10.2.ALK.3_F   | chr2:29446080-29446235 | GTCAAGGCTTGTCTCCTAG    |
| ALK.10.2.ALK.3_R   | chr2:29446080-29446235 | CATCAGTGACCTGAAGGAGG   |
| ALK.5.1.ALK.1_F    | chr2:29432651-29432793 | GGTGAGGCAGCTTTACTCA    |
| ALK.5.1.ALK.1_R    | chr2:29432651-29432793 | CTAGTGATGGCCGTTGTACA   |
| TP53.6.1.TP53.1_F  | chr17:7576571-7576709  | TCAGGAAGTAACACCATCGT   |
| TP53.6.1.TP53.1_R  | chr17:7576571-7576709  | AAAGACAATGGCTCCTGGTT   |
| TP53.11.1.TP53.1_F | chr17:7578380-7578540  | GCTGCTCACCATCGCTAT     |
| TP53.11.1.TP53.1_R | chr17:7578380-7578540  | TACAGTACTCCCCTGCCCT    |
| TP53.11.2.TP53.2_F | chr17:7578444-7578578  | ATGTGCTGTGACTGCTTGTA   |
| TP53.11.2.TP53.2_R | chr17:7578444-7578578  | CTTGTGCCCTGACTTTCAAC   |
| TP53.11.2.TP53.3_F | chr17:7578282-7578423  | CGGATAAGATGCTGAGGAGG   |
| TP53.11.2.TP53.3_R | chr17:7578282-7578423  | TACAAGCAGTCACAGCACAT   |
| TP53.3.1.TP53.1_F  | chr17:7572854-7573011  | CAAGCAAGGTTCAAAGACC    |
| TP53.3.1.TP53.1_R  | chr17:7572854-7573011  | CTCCCTGCTTCTGTCTCCTA   |
| TP53.7.1.TP53.1_F  | chr17:7576797-7576928  | CAGTCAAGAAGAAAACGGCA   |
| TP53.7.1.TP53.1_R  | chr17:7576797-7576928  | CCTTTCCTTGCCCTTTTCCCT  |
| TP53.9.1.TP53.1_F  | chr17:7577451-7577609  | GGTCAGAGGCAAGCAGA      |
| TP53.9.1.TP53.1_R  | chr17:7577451-7577609  | TGGCCCTGTGTTATCTCCTA   |
| TP53.12.1.TP53.1_F | chr17:7579322-7579484  | CAACTGACCGTCAAGTC      |
| TP53.12.1.TP53.1_R | chr17:7579322-7579484  | GAAGCTCCCAGAATGCCAG    |
| TP53.12.2.TP53.2_F | chr17:7579463-7579596  | TAGGAGCTGCTGGTGCA      |
| TP53.12.2.TP53.2_R | chr17:7579463-7579596  | TGACTGCTCTTTTACCACCAT  |
| TP53.12.2.TP53.3_F | chr17:7579234-7579386  | GGGTGAAGAGGAATCCCAA    |
| TP53.12.2.TP53.3_R | chr17:7579234-7579386  | CATCTTCTGTCCCTTCCAG    |
| TP53.14.1.TP53.1_F | chr17:7579838-7579967  | CCTTCCAATGGATCCACTCA   |
| TP53.14.1.TP53.1_R | chr17:7579838-7579967  | CAGGGTTGGAAGTGTCTCAT   |
| TP53.15.1.TP53.1_F | chr17:7580598-7580738  | AGTCATTCTCAGCCTGCAAT   |

|                     |                        |                          |
|---------------------|------------------------|--------------------------|
| TP53.15.1.TP53.1_R  | chr17:7580598-7580738  | GTTTGTAAATGCAGGGCTGAG    |
| TP53.8.1.TP53.1_F   | chr17:7577019-7577174  | CTTCTTGTCTGCTTGCTTAC     |
| TP53.8.1.TP53.1_R   | chr17:7577019-7577174  | CCTTACTGCCTCTTGCTTCT     |
| TP53.1.1.TP53.1_F   | chr17:7565193-7565338  | GGTTAAGAGATCCTCCTGCC     |
| TP53.1.1.TP53.1_R   | chr17:7565193-7565338  | GACTCCGTCTCTCTCTCTCT     |
| TP53.4.1.TP53.1_F   | chr17:7573892-7574043  | TTTCCAACCTAGGAAGGCAG     |
| TP53.4.1.TP53.1_R   | chr17:7573892-7574043  | CTTACTTCTCCCCCTCCTCT     |
| TP53.10.1.TP53.1_F  | chr17:7578135-7578292  | AGGGCCACTGACAACCA        |
| TP53.10.1.TP53.1_R  | chr17:7578135-7578292  | TGATTCCCTCACTGATTGCTCT   |
| TP53.13.1.TP53.1_F  | chr17:7579617-7579753  | ATGGGTGAAAAGAGCAGTCA     |
| TP53.13.1.TP53.1_R  | chr17:7579617-7579753  | CCTGTGGGAAGCGAAAATTC     |
| TP53.5.1.TP53.1_F   | chr17:7576483-7576641  | GCAGGCTAGGCTAAGCTATG     |
| TP53.5.1.TP53.1_R   | chr17:7576483-7576641  | AAAGGACCAGACCAGCTTTC     |
| DPYD.11.1.DPYD.1_F  | chr1:97981312-97981471 | GAGAAAGTTTTGGTGAGGGC     |
| DPYD.11.1.DPYD.1_R  | chr1:97981312-97981471 | TATGGAGCTTCCGTTTCTGTC    |
| DPYD.11.2.DPYD.2_F  | chr1:97981469-97981628 | AAAAGAGGGGTAGTTCAGGC     |
| DPYD.11.2.DPYD.2_R  | chr1:97981469-97981628 | CTCACTGACTTTTTTGCCAGT    |
| DPYD.11.9.DPYD.3_F  | chr1:97981173-97981311 | TGTGTAATGATAGGCTTGTCAA   |
| DPYD.11.9.DPYD.3_R  | chr1:97981173-97981311 | TTGAAGCTGGATGGGGTTTT     |
| DPYD.21.10.DPYD.1_F | chr1:98205887-98206103 | ACAAGCTGTATTCTGTACCCACA  |
| DPYD.21.10.DPYD.1_R | chr1:98205887-98206103 | ACTAGACACGGACTCTGAATGA   |
| DPYD.7.1.DPYD.1_F   | chr1:97771750-97771907 | TACCTTCCTTTGCAGCTCTT     |
| DPYD.7.1.DPYD.1_R   | chr1:97771750-97771907 | TGCTGTGTTCAGTACACA       |
| DPYD.7.2.DPYD.2_F   | chr1:97771606-97771764 | TTGTGGGATCAAGTGCTCAA     |
| DPYD.7.2.DPYD.2_R   | chr1:97771606-97771764 | CTGACCCCAAATGTCACTGA     |
| DPYD.2.1.DPYD.1_F   | chr1:97547879-97548035 | AGCATTCTAATCCAGCAGGA     |
| DPYD.2.1.DPYD.1_R   | chr1:97547879-97548035 | GCTTGCTAAGTAATTCAGTGGC   |
| DPYD.17.1.DPYD.1_F  | chr1:98157235-98157365 | AGTGTAGAGCTTACTCCTTTCT   |
| DPYD.17.1.DPYD.1_R  | chr1:98157235-98157365 | TGATGCCTGTTTTTCTTCTCC    |
| DPYD.22.7.DPYD.1_F  | chr1:98293661-98293790 | TGACTGTGCTATGGTGACC      |
| DPYD.22.7.DPYD.1_R  | chr1:98293661-98293790 | CTGCATAGATACAATTTTCTCAGG |
| DPYD.1.1.DPYD.1_F   | chr1:97544570-97544727 | AGATAAGGGTACGCCCTCTCT    |
| DPYD.1.1.DPYD.1_R   | chr1:97544570-97544727 | ACCTTTGTGGTCAGTGACAT     |
| DPYD.1.2.DPYD.2_F   | chr1:97544463-97544608 | GGAAAAGAGCTGAACACAAGG    |
| DPYD.1.2.DPYD.2_R   | chr1:97544463-97544608 | TGTTTGCCCTATTGTCGACT     |
| DPYD.18.1.DPYD.1_F  | chr1:98164962-98165106 | AGTGATGTCAGAGTACCCCA     |
| DPYD.18.1.DPYD.1_R  | chr1:98164962-98165106 | CCATGACAATTGATTTCCCCG    |
| DPYD.18.2.DPYD.2_F  | chr1:98164822-98164964 | ATCTGTGAGCCTGAAGTCC      |
| DPYD.18.2.DPYD.2_R  | chr1:98164822-98164964 | TTGTGCTTCCTTTTGGCTC      |
| DPYD.16.10.DPYD.1_F | chr1:98144579-98144805 | CACGAAAATGTCTGAAGGCAGT   |
| DPYD.16.10.DPYD.1_R | chr1:98144579-98144805 | TGGCTGACTTTTCATTCTTTTGA  |
| DPYD.23.3.DPYD.1_F  | chr1:98348778-98348920 | TGCCTTACAATGTGTGGAGT     |
| DPYD.23.3.DPYD.1_R  | chr1:98348778-98348920 | TGCTGTCTTTAGAGTATCCTGG   |
| DPYD.23.4.DPYD.2_F  | chr1:98348913-98349050 | GCATGAGTTTGTGTTTCGAGG    |
| DPYD.23.4.DPYD.2_R  | chr1:98348913-98349050 | AGATTGTACCAGTCACTCC      |
| DPYD.13.1.DPYD.1_F  | chr1:98039315-98039477 | TCAGCTCCCAGCACTGTA       |
| DPYD.13.1.DPYD.1_R  | chr1:98039315-98039477 | TTTCTGCCATTCCTGTCCC      |
| DPYD.13.6.DPYD.2_F  | chr1:98039382-98039536 | GGCTTTCAGATGGACCATCT     |
| DPYD.13.6.DPYD.2_R  | chr1:98039382-98039536 | TCAAGTTTCTTCTCTGTCTGT    |
| DPYD.6.1.DPYD.1_F   | chr1:97770804-97770960 | AAGCACAATGCAAGAAGTGG     |
| DPYD.6.1.DPYD.1_R   | chr1:97770804-97770960 | TCGTGTCTTATAAGAGCTGCA    |
| DPYD.3.1.DPYD.1_F   | chr1:97564064-97564210 | ACCTTGATGGTAGGAATAGGC    |
| DPYD.3.1.DPYD.1_R   | chr1:97564064-97564210 | TCTGAGCTAACATGCTTCTCT    |
| DPYD.3.5.DPYD.2_F   | chr1:97563912-97564066 | GCAGTTTTCCCATGGACAG      |
| DPYD.3.5.DPYD.2_R   | chr1:97563912-97564066 | AGAGAAACTGTTTTATCCCCAA   |
| DPYD.9.8.DPYD.1_F   | chr1:97847895-97848044 | CTCATGGCAGCTCTTTATTTAAAC |
| DPYD.9.8.DPYD.1_R   | chr1:97847895-97848044 | GTACAACCTGGATAACTACTTGA  |
| DPYD.12.1.DPYD.1_F  | chr1:98015166-98015324 | TGCTTTCCATCATTACCCG      |
| DPYD.12.1.DPYD.1_R  | chr1:98015166-98015324 | GTCTGTTGACTAGTGATTGTCT   |
| DPYD.12.2.DPYD.2_F  | chr1:98015112-98015242 | GTGGAAATGATGGCAAATGC     |
| DPYD.12.2.DPYD.2_R  | chr1:98015112-98015242 | GGTCTCCCAGAAGTAGATCC     |
| DPYD.15.10.DPYD.1_F | chr1:98060526-98060748 | GGTTGGGTGTGAGAGCTGAA     |
| DPYD.15.10.DPYD.1_R | chr1:98060526-98060748 | AAGCCCTCCTCCTGCTAAT      |
| DPYD.20.3.DPYD.1_F  | chr1:98187036-98187178 | TTGTGCATGGTGATGGTAGT     |
| DPYD.20.3.DPYD.1_R  | chr1:98187036-98187178 | TTCTGACAACCCACTTGGTC     |
| DPYD.20.5.DPYD.2_F  | chr1:98187148-98187277 | TGCATCCACCTACACAAAGA     |
| DPYD.20.5.DPYD.2_R  | chr1:98187148-98187277 | TGTTTGTGCTAATTTGGCTGT    |

|                     |                        |                          |
|---------------------|------------------------|--------------------------|
| DPYD.14.1.DPYD.1_F  | chr1:98058794-98058944 | CTCCTCAGGGACAGCTCTTA     |
| DPYD.14.1.DPYD.1_R  | chr1:98058794-98058944 | GGGGTTTTTCCTTTCATCATTCA  |
| DPYD.14.2.DPYD.2_F  | chr1:98058658-98058810 | GAACAATTATGTGTAGCCCTG    |
| DPYD.14.2.DPYD.2_R  | chr1:98058658-98058810 | CGTGTGTTTCATCGTCTTCAG    |
| DPYD.8.1.DPYD.1_F   | chr1:97839109-97839250 | ACTTAGTGCCAGCTGTCAAG     |
| DPYD.8.1.DPYD.1_R   | chr1:97839109-97839250 | CAACGGTGAAGCCTATTGG      |
| DPYD.4.1.DPYD.1_F   | chr1:97658653-97658809 | TGAGTTCACGTATACGTGGA     |
| DPYD.4.1.DPYD.1_R   | chr1:97658653-97658809 | TGGTTGACTGCTCTGCTTT      |
| DPYD.4.2.DPYD.2_F   | chr1:97658537-97658688 | GAGGCACTGTGTTTCCTTTG     |
| DPYD.4.2.DPYD.2_R   | chr1:97658537-97658688 | CAAGACTGGGATGGACAGAG     |
| DPYD.24.1.DPYD.1_F  | chr1:98386339-98386481 | AAACTTCCC CGCTCTCTC      |
| DPYD.24.1.DPYD.1_R  | chr1:98386339-98386481 | ACTCGAGACTGTAGGCACT      |
| DPYD.19.1.DPYD.1_F  | chr1:98186399-98186539 | ACCTGCTTGTGACTCCAAA      |
| DPYD.19.1.DPYD.1_R  | chr1:98186399-98186539 | TGGAAGCAGGTCTTTTATTTGG   |
| DPYD.10.3.DPYD.1_F  | chr1:97915588-97915745 | TCACCAACTTATGCCAATTCTC   |
| DPYD.10.3.DPYD.1_R  | chr1:97915588-97915745 | TGTTTCCCCAGAATCATCC      |
| DPYD.10.4.DPYD.2_F  | chr1:97915717-97915869 | AGAAAGGAGCTTTGTCCAGG     |
| DPYD.10.4.DPYD.2_R  | chr1:97915717-97915869 | AAATGTGAGAAGGGACCTCA     |
| DPYD.5.3.DPYD.1_F   | chr1:97700405-97700542 | GGGACAGACAAAACACAATGAC   |
| DPYD.5.3.DPYD.1_R   | chr1:97700405-97700542 | TGATTTTGTGTAGGGACAGCA    |
| DPYD.5.4.DPYD.2_F   | chr1:97700478-97700625 | AGTCAATTCCACCAGTAGCC     |
| DPYD.5.4.DPYD.2_R   | chr1:97700478-97700625 | TGACGCTGTATCACATCAT      |
| PMS2.6.9.PMS2.1_F   | chr7:6029420-6029576   | TTAGAAGCTGTTTGTACACTGT   |
| PMS2.6.9.PMS2.1_R   | chr7:6029420-6029576   | TTTGCCCTAGAATGCGTGA      |
| PMS2.6.10.PMS2.2_F  | chr7:6029524-6029652   | GAGGTCTTTAAACTGCCAACA    |
| PMS2.6.10.PMS2.2_R  | chr7:6029524-6029652   | AGTGAGACGCTGTCTGAAAA     |
| PMS2.11.1.PMS2.1_F  | chr7:6042150-6042287   | GAAAAAATGCTGTCACGCT      |
| PMS2.11.1.PMS2.1_R  | chr7:6042150-6042287   | GTCTCTCACTGAACACACCA     |
| PMS2.11.2.PMS2.2_F  | chr7:6042052-6042211   | TGCTCATGTGCATTAACCAA     |
| PMS2.11.2.PMS2.2_R  | chr7:6042052-6042211   | GTTTGGAACTCGACTGATGT     |
| PMS2.3.8.PMS2.1_F   | chr7:6018214-6018357   | ACCCAGCCGCTATAGTTCTA     |
| PMS2.3.8.PMS2.1_R   | chr7:6018214-6018357   | AGCTAAATGTTTACTTCAGGA    |
| PMS2.7.1.PMS2.1_F   | chr7:6031601-6031739   | ACTGAAATGCCAATGGAAT      |
| PMS2.7.1.PMS2.1_R   | chr7:6031601-6031739   | AATGTTGTTAGAATGCGGGG     |
| PMS2.9.1.PMS2.1_F   | chr7:6036951-6037095   | AGTTCTCTTGCCAGCAATCT     |
| PMS2.9.1.PMS2.1_R   | chr7:6036951-6037095   | ACAGATTAAGTCCACTCTGTCT   |
| PMS2.12.11.PMS2.1_F | chr7:6043303-6043440   | CTAAGGGGTCAAGTGAGTGG     |
| PMS2.12.11.PMS2.1_R | chr7:6043303-6043440   | GCACTTGAGATATCTTAGTCTTAC |
| PMS2.2.1.PMS2.1_F   | chr7:6017258-6017415   | GAGGCAACATCTGCTTGAC      |
| PMS2.2.1.PMS2.1_R   | chr7:6017258-6017415   | ACGTGTTTGTCAAGTCATGG     |
| PMS2.2.2.PMS2.2_F   | chr7:6017214-6017366   | TGACAGCCAGGCTTCTTTA      |
| PMS2.2.2.PMS2.2_R   | chr7:6017214-6017366   | CCAGTCACTGAAAGGGCTAA     |
| PMS2.14.12.PMS2.1_F | chr7:6045516-6045652   | TGTGGCTTAAACTCTCCCA      |
| PMS2.14.12.PMS2.1_R | chr7:6045516-6045652   | ACTGATTTCTCTAGTACAGAACCT |
| PMS2.15.1.PMS2.1_F  | chr7:6048583-6048716   | AATGCCGTGGGTCTCAAAG      |
| PMS2.15.1.PMS2.1_R  | chr7:6048583-6048716   | CCAATGGGAGTTCAGGAGG      |
| PMS2.8.13.PMS2.1_F  | chr7:6035143-6035282   | AGTCAAAGGCATAAAGAACAACT  |
| PMS2.8.13.PMS2.1_R  | chr7:6035143-6035282   | CTCTGGAATCCTGCCCTTAC     |
| PMS2.4.6.PMS2.1_F   | chr7:6022451-6022605   | TGGGAATGAACACTAAACACAC   |
| PMS2.4.6.PMS2.1_R   | chr7:6022451-6022605   | GCAGTAAAACGATGTTTGCAG    |
| PMS2.4.7.PMS2.2_F   | chr7:6022594-6022736   | TCCCAGGTTAAACTGACCAA     |
| PMS2.4.7.PMS2.2_R   | chr7:6022594-6022736   | AAAAGAAAGCGGGATGGCTA     |
| PMS2.1.1.PMS2.1_F   | chr7:6013037-6013174   | ACAGTACTACGGTCAGTTC      |
| PMS2.1.1.PMS2.1_R   | chr7:6013037-6013174   | ACCATTGTGTCTCACACTCA     |
| PMS2.1.2.PMS2.2_F   | chr7:6012879-6013038   | GCAATGCTCCATCTGGTTTG     |
| PMS2.1.2.PMS2.2_R   | chr7:6012879-6013038   | CCAACCTGGGTGTCATTTCT     |
| PMS2.10.6.PMS2.1_F  | chr7:6038720-6038878   | AGAGCAATAAGAGGCGTTGA     |
| PMS2.10.6.PMS2.1_R  | chr7:6038720-6038878   | CCAAAATGGTCCAGGTCTTAC    |
| PMS2.10.7.PMS2.2_F  | chr7:6038845-6038988   | CAAGCTGATTGGTGCAACTT     |
| PMS2.10.7.PMS2.2_R  | chr7:6038845-6038988   | TGCGATGATGTGAGAACCTT     |
| PMS2.13.1.PMS2.1_F  | chr7:6043568-6043721   | TTCTGAGACATGTGACCCAA     |
| PMS2.13.1.PMS2.1_R  | chr7:6043568-6043721   | TGATAGCATGGGTCCGTTTT     |
| PMS2.5.1.PMS2.1_F   | chr7:6026500-6026659   | ACTTTGCTGTGCTTCATGATG    |
| PMS2.5.1.PMS2.1_R   | chr7:6026500-6026659   | CCCCAAACAAAAGCGTTT       |
| PMS2.5.2.PMS2.2_F   | chr7:6026679-6026839   | AAAACGCTTTGTGTTTGGGG     |
| PMS2.5.2.PMS2.2_R   | chr7:6026679-6026839   | CACTGCAGCAGCGAGTA        |
| PMS2.5.3.PMS2.3_F   | chr7:6026551-6026682   | ATAGAAAAGTCCAGGGGCAC     |

PMS2.5.3.PMS2.3\_R  
PMS2.5.3.PMS2.4\_F  
PMS2.5.3.PMS2.4\_R  
PMS2.5.4.PMS2.5\_F  
PMS2.5.4.PMS2.5\_R  
PMS2.5.4.PMS2.6\_F  
PMS2.5.4.PMS2.6\_R  
PMS2.5.5.PMS2.7\_F  
PMS2.5.5.PMS2.7\_R  
PTEN.6.1.PTEN.1\_F  
PTEN.6.1.PTEN.1\_R  
PTEN.6.2.PTEN.2\_F  
PTEN.6.2.PTEN.2\_R  
PTEN.3.1.PTEN.1\_F  
PTEN.3.1.PTEN.1\_R  
PTEN.7.3.PTEN.1\_F  
PTEN.7.3.PTEN.1\_R  
PTEN.7.4.PTEN.2\_F  
PTEN.7.4.PTEN.2\_R  
PTEN.9.1.PTEN.1\_F  
PTEN.9.1.PTEN.1\_R  
PTEN.9.5.PTEN.2\_F  
PTEN.9.5.PTEN.2\_R  
PTEN.2.6.PTEN.1\_F  
PTEN.2.6.PTEN.1\_R  
PTEN.8.5.PTEN.1\_F  
PTEN.8.5.PTEN.1\_R  
PTEN.8.6.PTEN.2\_F  
PTEN.8.6.PTEN.2\_R  
PTEN.1.1.PTEN.1\_F  
PTEN.1.1.PTEN.1\_R  
PTEN.4.5.PTEN.1\_F  
PTEN.4.5.PTEN.1\_R  
PTEN.5.1.PTEN.1\_F  
PTEN.5.1.PTEN.1\_R  
PTEN.5.2.PTEN.2\_F  
PTEN.5.2.PTEN.2\_R  
PTEN.5.5.PTEN.3\_F  
PTEN.5.5.PTEN.3\_R  
PDGFRB.11.1.PDGFRB.1\_F  
PDGFRB.11.1.PDGFRB.1\_R  
PDGFRB.21.1.PDGFRB.1\_F  
PDGFRB.21.1.PDGFRB.1\_R  
PDGFRB.21.2.PDGFRB.2\_F  
PDGFRB.21.2.PDGFRB.2\_R  
PDGFRB.21.2.PDGFRB.3\_F  
PDGFRB.21.2.PDGFRB.3\_R  
PDGFRB.7.1.PDGFRB.1\_F  
PDGFRB.7.1.PDGFRB.1\_R  
PDGFRB.2.1.PDGFRB.1\_F  
PDGFRB.2.1.PDGFRB.1\_R  
PDGFRB.2.2.PDGFRB.2\_F  
PDGFRB.2.2.PDGFRB.2\_R  
PDGFRB.17.1.PDGFRB.1\_F  
PDGFRB.17.1.PDGFRB.1\_R  
PDGFRB.17.2.PDGFRB.2\_F  
PDGFRB.17.2.PDGFRB.2\_R  
PDGFRB.22.1.PDGFRB.1\_F  
PDGFRB.22.1.PDGFRB.1\_R  
PDGFRB.1.1.PDGFRB.1\_F  
PDGFRB.1.1.PDGFRB.1\_R  
PDGFRB.1.2.PDGFRB.2\_F  
PDGFRB.1.2.PDGFRB.2\_R  
PDGFRB.18.1.PDGFRB.1\_F  
PDGFRB.18.1.PDGFRB.1\_R  
PDGFRB.18.2.PDGFRB.2\_F  
PDGFRB.18.2.PDGFRB.2\_R

chr7:6026551-6026682  
chr7:6026860-6027021  
chr7:6026860-6027021  
chr7:6026714-6026871  
chr7:6026714-6026871  
chr7:6027021-6027181  
chr7:6027021-6027181  
chr7:6027115-6027268  
chr7:6027115-6027268  
chr10:89711879-89712021  
chr10:89711879-89712021  
chr10:89711800-89711952  
chr10:89711800-89711952  
chr10:89685244-89685379  
chr10:89685244-89685379  
chr10:89717579-89717716  
chr10:89717579-89717716  
chr10:89717717-89717877  
chr10:89717717-89717877  
chr10:89725084-89725240  
chr10:89725084-89725240  
chr10:89724926-89725083  
chr10:89724926-89725083  
chr10:89653754-89654004  
chr10:89653754-89654004  
chr10:89720757-89720884  
chr10:89720757-89720884  
chr10:89720570-89720758  
chr10:89720570-89720758  
chr10:89624218-89624369  
chr10:89624218-89624369  
chr10:89690736-89690884  
chr10:89690736-89690884  
chr10:89692820-89692979  
chr10:89692820-89692979  
chr10:89692906-89693035  
chr10:89692906-89693035  
chr10:89692693-89692829  
chr10:89692693-89692829  
chr5:149504236-149504394  
chr5:149504236-149504394  
chr5:149515128-149515287  
chr5:149515128-149515287  
chr5:149515281-149515443  
chr5:149515281-149515443  
chr5:149515031-149515187  
chr5:149515031-149515187  
chr5:149500766-149500898  
chr5:149500766-149500898  
chr5:149497260-149497422  
chr5:149497260-149497422  
chr5:149497260-149497422  
chr5:149497260-149497422  
chr5:149497157-149497287  
chr5:149497157-149497287  
chr5:149512392-149512546  
chr5:149512392-149512546  
chr5:149512302-149512445  
chr5:149512302-149512445  
chr5:149516460-149516610  
chr5:149516460-149516610  
chr5:149495351-149495509  
chr5:149495351-149495509  
chr5:149495228-149495371  
chr5:149495228-149495371  
chr5:149513156-149513319  
chr5:149513156-149513319  
chr5:149513304-149513440  
chr5:149513304-149513440  
chr5:149513304-149513440

TGCCTCAGCCAACTAATCTC  
TCGCTGCTGCAGTGACT  
GGTATGCTGTCTTCTAGCACT  
GCTGAGGCAAAACCTCGAAAT  
ATTCTGAGGGGTTCCAGCATC  
TTGTCAGAGATGGCACCTG  
AAGCAGGATCAATCCCCTTC  
GGCTTGTCTCTGTGTGTG  
TAGTCCCTGACCCCTCTTCTC  
TTTTTCTGTCCACCAGGGAG  
GGAAGGATGAGAAATTTCAAGCA  
AATGGCTACGACCCAGTTAC  
TTGTGAAACAACAGTGCCAC  
GCTCATTTTTGTAAATGGTGGC  
ACCTCACTCTAACAAGCAGA  
ACAGTTAAAGGCATTTCTGTG  
CTTTGATATCACCACACACAGG  
TGAGTTCCCTCAGCCGTTA  
GCAAAACACCTGCAGATCTA  
AACAGTAGAGGAGCCGTC  
CATGGTGTTTTATCCCTCTTGA  
AGATCATGTTTGTACAGTGCT  
TGAAGTGTAGCCCTCTGGAT  
AGTTTGTATTGCTGCATATTTT  
GTCATTAGGTACGGTAAGCCA  
TGTGATCAAGAAATCGATAGCA  
CAACCCCAACAAAATGTTAAT  
TGCAAAATGTTAACATAGGTGAC  
TCTGCACGCTCTATACTGCA  
CCTTTTTCTTCAGCCACAGG  
CTACGGACATTTTCGCATCC  
GATTCAGGCAATGTTTGTAGT  
AGTAAGATACAGTCTATCGGGT  
CCACCACAGCTAGAACTATC  
CTGGTCTTACTTCCCAT  
TGTAAGCTGGAAAGGACG  
TCTCAGATCCAGGAAGAGGA  
CCTGTTAAGTTGTATGCAACA  
GCCATTGGTCAAGATCTCTAC  
GAGAGGCTAAGTGTGTGGG  
ATGGATCATCTCTGCACCAG  
GCCCTTACCTGGCACA  
GTGGTGTGGAAACGGAT  
ATTTCTGTGGGGGCTC  
TCTGATACCTCCTCTCCCAA  
TAGGATGGCTGCATTTTACA  
GGCTAGACACGGGAGAATAC  
CCACCAACACCACCGTA  
AAGATAGCAGGTGACCCCTCT  
AGGCAGGGGATGATATAGT  
TTTGGTCTCCCTGCC  
ACACACTGTGCACAATTTCC  
CCAGCTCCGTCCTCTATACT  
GTGCGGTGTCTTTGAACC  
CTTGGGATTTCAGTTGGTGC  
CAAGAATGGGATGGGAGAGC  
ACAATTTGCTGAGCTGCATC  
AACTAAAGCTGAAGGGCAGG  
GTTTAACTCTGCAGGACACC  
GGAAGCTATCCTCTGCTTCC  
CTCACTGCCCTTTCTCTAG  
GAAGGGGACAGTGATAAGG  
TGAACAGTTGCCGGATTC  
AGGCACACCAACCAC  
AACCTGTGCTGCAGAGTG  
CCAAGAGGAAGTCAGTCACC  
CATACCCCGCAAGAAGTA

|                        |                          |                             |
|------------------------|--------------------------|-----------------------------|
| PDGFRB.18.2.PDGFRB.3_F | chr5:149513130-149513283 | TGAAGGAATTGGGGATTGGG        |
| PDGFRB.18.2.PDGFRB.3_R | chr5:149513130-149513283 | GGTGACTGACTTCCTCTTGG        |
| PDGFRB.13.1.PDGFRB.1_F | chr5:149506032-149506180 | GGCAGAGGGGTGGAATTTAT        |
| PDGFRB.13.1.PDGFRB.1_R | chr5:149506032-149506180 | CTGCTCTCATCTCTGCCCTC        |
| PDGFRB.16.1.PDGFRB.1_F | chr5:149511523-149511685 | AAGGAGCAGGGACATGG           |
| PDGFRB.16.1.PDGFRB.1_R | chr5:149511523-149511685 | ACTGTAAGAGTCCTTCCGAC        |
| PDGFRB.6.1.PDGFRB.1_F  | chr5:149500430-149500595 | ACTGTGACTGCCCTGCA           |
| PDGFRB.6.1.PDGFRB.1_R  | chr5:149500430-149500595 | TTGTCCCAAGGCCTCA            |
| PDGFRB.3.1.PDGFRB.1_F  | chr5:149498261-149498418 | CCTTGTAFACTCGGTGTCTGAC      |
| PDGFRB.3.1.PDGFRB.1_R  | chr5:149498261-149498418 | CTGACCCCTTCTCCCTATCCC       |
| PDGFRB.9.1.PDGFRB.1_F  | chr5:149502645-149502788 | GGCAGAGCATTGCTGTAGA         |
| PDGFRB.9.1.PDGFRB.1_R  | chr5:149502645-149502788 | TGAGGCCTCCATAGGGACT         |
| PDGFRB.9.2.PDGFRB.2_F  | chr5:149502577-149502733 | GCTCCTCAGGTATCCCAAAG        |
| PDGFRB.9.2.PDGFRB.2_R  | chr5:149502577-149502733 | ATCATCACTGAGTACTGCCG        |
| PDGFRB.12.1.PDGFRB.1_F | chr5:149505004-149505145 | ACATGAGGCCTCTCAGGAC         |
| PDGFRB.12.1.PDGFRB.1_R | chr5:149505004-149505145 | CTAATTCCTGGGGTTGGTCC        |
| PDGFRB.14.1.PDGFRB.1_F | chr5:149509329-149509490 | GGACTCACAGTGTGGCA           |
| PDGFRB.14.1.PDGFRB.1_R | chr5:149509329-149509490 | GCTGCTGGGGAACAGTT           |
| PDGFRB.14.2.PDGFRB.2_F | chr5:149509467-149509623 | CTCCAGTACGTACAGTTAG         |
| PDGFRB.14.2.PDGFRB.2_R | chr5:149509467-149509623 | CAGTGGGACATAGGAAGTGG        |
| PDGFRB.14.2.PDGFRB.3_F | chr5:149509267-149509420 | GGGCACATTACCAATTAGGC        |
| PDGFRB.14.2.PDGFRB.3_R | chr5:149509267-149509420 | CAGGAGTTTGAGGTGGTGAG        |
| PDGFRB.15.1.PDGFRB.1_F | chr5:149510070-149510228 | TTTTTCTAGCCAGCTGGGG         |
| PDGFRB.15.1.PDGFRB.1_R | chr5:149510070-149510228 | AACTCAGTGTCTCTCCATG         |
| PDGFRB.20.1.PDGFRB.1_F | chr5:149514279-149514438 | TCTGTGGAGGGTTATACTTGC       |
| PDGFRB.20.1.PDGFRB.1_R | chr5:149514279-149514438 | AAGAAAGGGGACGTTGCAC         |
| PDGFRB.20.2.PDGFRB.2_F | chr5:149514428-149514585 | AAGCCACGTTGGTGATCATA        |
| PDGFRB.20.2.PDGFRB.2_R | chr5:149514428-149514585 | TTTATTCACGGCTCCACTCC        |
| PDGFRB.8.1.PDGFRB.1_F  | chr5:149501443-149501603 | ATGTCACTATGTCCACCCAC        |
| PDGFRB.8.1.PDGFRB.1_R  | chr5:149501443-149501603 | GATGCTCCTTTACCCCCAG         |
| PDGFRB.4.1.PDGFRB.1_F  | chr5:149499030-149499187 | ATGCATGAGACTCCACTCAC        |
| PDGFRB.4.1.PDGFRB.1_R  | chr5:149499030-149499187 | CCTTGCTCCTGTAGAAGAGGG       |
| PDGFRB.19.1.PDGFRB.1_F | chr5:149513443-149513581 | TGCCGGCCCCACATTA            |
| PDGFRB.19.1.PDGFRB.1_R | chr5:149513443-149513581 | CCCAGACCTAAGCCAATCTC        |
| PDGFRB.10.1.PDGFRB.1_F | chr5:149503781-149503924 | CTTGGTGGTGGGCACTTT          |
| PDGFRB.10.1.PDGFRB.1_R | chr5:149503781-149503924 | GGCCCCCATTTTCCCTCA          |
| PDGFRB.5.1.PDGFRB.1_F  | chr5:149499532-149499686 | CATGAGTGGTCGAGGTAGAC        |
| PDGFRB.5.1.PDGFRB.1_R  | chr5:149499532-149499686 | TGTCCTGACCTCCCTACAG         |
| MSH6.6.1.MSH6.1_F      | chr2:48032046-48032181   | GACCTTTTCCCTCCCTCATTCA      |
| MSH6.6.1.MSH6.1_R      | chr2:48032046-48032181   | ACTGAATGAGAACTTAAGTGGG      |
| MSH6.3.1.MSH6.1_F      | chr2:48023053-48023210   | AGGTTCAAATCAAAGGAAGCC       |
| MSH6.3.1.MSH6.1_R      | chr2:48023053-48023210   | TAACAACCTGAATGCTTGCCG       |
| MSH6.3.2.MSH6.2_F      | chr2:48023015-48023158   | ACCCGGCCCTTATTGTTTAT        |
| MSH6.3.2.MSH6.2_R      | chr2:48023015-48023158   | CTCTGAGGGCTCATCACAAA        |
| MSH6.7.19.MSH6.1_F     | chr2:48032629-48032849   | GCCCGGCCAATAATGCATA         |
| MSH6.7.19.MSH6.1_R     | chr2:48032629-48032849   | AGTCTTCAAATGAGAAGTTTAAATGCT |
| MSH6.9.1.MSH6.1_F      | chr2:48033681-48033840   | GGGAGCTTGTCTAAAAAGC         |
| MSH6.9.1.MSH6.1_R      | chr2:48033681-48033840   | CCTTCCCTTTTACTGTTTCT        |
| MSH6.9.2.MSH6.2_F      | chr2:48033572-48033701   | TTGCTAGCACATGTATCGCT        |
| MSH6.9.2.MSH6.2_R      | chr2:48033572-48033701   | TCCTCTGGGAGATTAGCAAG        |
| MSH6.2.1.MSH6.1_F      | chr2:48018106-48018267   | TTGGTTTGGGCCAAGATG          |
| MSH6.2.1.MSH6.1_R      | chr2:48018106-48018267   | CACACATGGCAGTAGTGACT        |
| MSH6.2.2.MSH6.2_F      | chr2:48017991-48018120   | TGCCAGAAGACTTGGGAATTG       |
| MSH6.2.2.MSH6.2_R      | chr2:48017991-48018120   | TTGTAACCAGACAAGGCCA         |
| MSH6.8.1.MSH6.1_F      | chr2:48033392-48033551   | GCAATAGCAAATGCAGTTGT        |
| MSH6.8.1.MSH6.1_R      | chr2:48033392-48033551   | AGCGATACATGTGCTAGCAA        |
| MSH6.8.16.MSH6.2_F     | chr2:48033268-48033400   | CCGATGTTGCTTTTCTGTCC        |
| MSH6.8.16.MSH6.2_R     | chr2:48033268-48033400   | ACGACATTTTATAGTCTCAGCA      |
| MSH6.4.1.MSH6.1_F      | chr2:48025760-48025919   | CTGGCAGGTAGGCACAA           |
| MSH6.4.1.MSH6.1_R      | chr2:48025760-48025919   | CTTCCTCCTTAGTGTCTGGC        |
| MSH6.4.2.MSH6.2_F      | chr2:48025918-48026079   | GTGGCTCTGATGTGGAATTT        |
| MSH6.4.2.MSH6.2_R      | chr2:48025918-48026079   | TTGTTTGGTGGCTGAGGG          |
| MSH6.4.2.MSH6.3_F      | chr2:48025748-48025881   | ATACTCTTTCCCTGCCTGGC        |
| MSH6.4.2.MSH6.3_R      | chr2:48025748-48025881   | CCACCAATGTCACTCTCAGA        |
| MSH6.4.3.MSH6.4_F      | chr2:48026088-48026249   | AAGGAAACGCCCTCAGC           |
| MSH6.4.3.MSH6.4_R      | chr2:48026088-48026249   | CTGTGCTCATCTCTTCTTT         |
| MSH6.4.4.MSH6.5_F      | chr2:48026052-48026190   | GTGACTGGAAATGGCTCTCT        |

|                     |                         |                           |
|---------------------|-------------------------|---------------------------|
| MSH6.4.4.MSH6.5_R   | chr2:48026052-48026190  | GTAGGGCGACTACTGTTCATC     |
| MSH6.4.4.MSH6.6_F   | chr2:48026286-48026450  | AGGAGGAGGGCCTGATCA        |
| MSH6.4.4.MSH6.6_R   | chr2:48026286-48026450  | AGCCCCAGTTCACTGACT        |
| MSH6.4.5.MSH6.7_F   | chr2:48026211-48026351  | GATGACAGTAGTCGCCCTAC      |
| MSH6.4.5.MSH6.7_R   | chr2:48026211-48026351  | TAATCTGCCACCACTTCCTC      |
| MSH6.4.5.MSH6.8_F   | chr2:48026470-48026630  | TCAGTGAACGGGGCTG          |
| MSH6.4.5.MSH6.8_R   | chr2:48026470-48026630  | CCTCACCACTCTATCATACTTG    |
| MSH6.4.6.MSH6.9_F   | chr2:48026441-48026592  | TGAGCTGTACCACATGGATG      |
| MSH6.4.6.MSH6.9_R   | chr2:48026441-48026592  | CTACATCGTGCCCTCCATCAT     |
| MSH6.4.6.MSH6.10_F  | chr2:48026711-48026870  | TACAGTGTGCTGGAAGGTG       |
| MSH6.4.6.MSH6.10_R  | chr2:48026711-48026870  | GGATAGTGTGCCACTAGAGTC     |
| MSH6.4.7.MSH6.11_F  | chr2:48026613-48026765  | ATGATGGAGGCACGATGTAG      |
| MSH6.4.7.MSH6.11_R  | chr2:48026613-48026765  | CACGAGTATGGCCAGAAGAA      |
| MSH6.4.7.MSH6.12_F  | chr2:48026900-48027060  | GCACACTATCCCCCAGTAC       |
| MSH6.4.7.MSH6.12_R  | chr2:48026900-48027060  | ACCCCAATGCCATCACTTAG      |
| MSH6.4.8.MSH6.13_F  | chr2:48026863-48026997  | CAGATGATCGCCATTGTTCG      |
| MSH6.4.8.MSH6.13_R  | chr2:48026863-48026997  | TTGGATGCATCCCAAAACTG      |
| MSH6.4.8.MSH6.14_F  | chr2:48027090-48027250  | GCATTGGGGTGTATTACC        |
| MSH6.4.8.MSH6.14_R  | chr2:48027090-48027250  | TGTGTCAGAATCCAAGGGAA      |
| MSH6.4.9.MSH6.15_F  | chr2:48027018-48027168  | CAGTTTTGGGATGCATCCAA      |
| MSH6.4.9.MSH6.15_R  | chr2:48027018-48027168  | AAGACACAACCACCTAGAGC      |
| MSH6.4.9.MSH6.16_F  | chr2:48027271-48027430  | TTCCCTTGGATTCTGACACA      |
| MSH6.4.9.MSH6.16_R  | chr2:48027271-48027430  | GCTTTAGGAGCCGCTTAC        |
| MSH6.4.10.MSH6.17_F | chr2:48027183-48027312  | CTCTCTGCTCTAGGTGGTTG      |
| MSH6.4.10.MSH6.17_R | chr2:48027183-48027312  | GCATCTAGCACCATTCGTTG      |
| MSH6.4.10.MSH6.18_F | chr2:48027470-48027633  | GCTTTGTGCCCACTCT          |
| MSH6.4.10.MSH6.18_R | chr2:48027470-48027633  | TTATAGCCCTGCTGTCTGG       |
| MSH6.4.11.MSH6.19_F | chr2:48027420-48027563  | GAGAGGGTTGATACTTGCCA      |
| MSH6.4.11.MSH6.19_R | chr2:48027420-48027563  | GCCTCTCAAGATCTGGAAGC      |
| MSH6.4.11.MSH6.20_F | chr2:48027654-48027813  | CCAGACAGCAGGGCTATAAT      |
| MSH6.4.11.MSH6.20_R | chr2:48027654-48027813  | TCAGGAAAACGACCTTCAGG      |
| MSH6.4.12.MSH6.21_F | chr2:48027536-48027694  | CATGGTTGTGCCTGACAAAA      |
| MSH6.4.12.MSH6.21_R | chr2:48027536-48027694  | TCCTTCCAGAGCAGAAAGAA      |
| MSH6.4.12.MSH6.22_F | chr2:48027834-48027993  | CCTGAAGGTCGTTTTCTCTGA     |
| MSH6.4.12.MSH6.22_R | chr2:48027834-48027993  | GCCAATTCTGTTGCCTG         |
| MSH6.4.13.MSH6.23_F | chr2:48027766-48027910  | TGGAAGAAGTTGCTGATGGT      |
| MSH6.4.13.MSH6.23_R | chr2:48027766-48027910  | ATCAGAGTCAAAGCCTGCTT      |
| MSH6.4.13.MSH6.24_F | chr2:48028014-48028173  | GCGCAACAGAATTGGCTG        |
| MSH6.4.13.MSH6.24_R | chr2:48028014-48028173  | TCCGTTCTTCTAGCATTTATGAG   |
| MSH6.4.14.MSH6.25_F | chr2:48027921-48028052  | ATTACTCCCAAAGCAGGCTT      |
| MSH6.4.14.MSH6.25_R | chr2:48027921-48028052  | TCTCAGGAATTCAGCTGG        |
| MSH6.4.14.MSH6.26_F | chr2:48028199-48028329  | AAATGTGGAAGAACGGAGGG      |
| MSH6.4.14.MSH6.26_R | chr2:48028199-48028329  | CTGGCAAACAGCACTACTTA      |
| MSH6.4.15.MSH6.27_F | chr2:48028073-48028218  | CCAGCTGGAAAATTCCTGAGA     |
| MSH6.4.15.MSH6.27_R | chr2:48028073-48028218  | TTATAGAACAGTCGCCGCAT      |
| MSH6.1.1.MSH6.1_F   | chr2:48010412-48010572  | TGTACAGCTTCTTCCCAAG       |
| MSH6.1.1.MSH6.1_R   | chr2:48010412-48010572  | GTTGAGTTCTTCGCCTTG        |
| MSH6.1.16.MSH6.2_F  | chr2:48010250-48010413  | TGTTGATTGGCCACTGGG        |
| MSH6.1.16.MSH6.2_R  | chr2:48010250-48010413  | ATCACTCAGCGCCGGA          |
| MSH6.1.17.MSH6.3_F  | chr2:48010509-48010654  | TCTCCTTCCCCAGGCG          |
| MSH6.1.17.MSH6.3_R  | chr2:48010509-48010654  | CTATGCCCCCGCCTTC          |
| MSH6.10.1.MSH6.1_F  | chr2:48033875-48034024  | GGGAAGGGATGATGCACTAT      |
| MSH6.10.1.MSH6.1_R  | chr2:48033875-48034024  | ACCACCTTTGTGAGAAGTCA      |
| MSH6.5.1.MSH6.1_F   | chr2:48030579-48030738  | ATGTTTTACTGTGCTGGCT       |
| MSH6.5.1.MSH6.1_R   | chr2:48030579-48030738  | ATTTTCTGCTCCTCTTCTT       |
| MSH6.5.2.MSH6.2_F   | chr2:48030526-48030669  | GCTGATAAAACCCCAACG        |
| MSH6.5.2.MSH6.2_R   | chr2:48030526-48030669  | CTTCGTAATGCAAGGATGGC      |
| MSH6.5.18.MSH6.3_F  | chr2:48030739-48030887  | CCTAATGACATTCTAATAGGCTGTG |
| MSH6.5.18.MSH6.3_R  | chr2:48030739-48030887  | CTGTGTTGGAAAATGATCACC     |
| JAK3.11.1.JAK3.1_F  | chr19:17946732-17946891 | AGGCAGAGGAGCACTCA         |
| JAK3.11.1.JAK3.1_R  | chr19:17946732-17946891 | ACACAAGTGCAGTTCAGTCT      |
| JAK3.21.1.JAK3.1_F  | chr19:17953846-17953994 | GGCTCTCACCTGACAGTCT       |
| JAK3.21.1.JAK3.1_R  | chr19:17953846-17953994 | TCAGCTGATGCTCCCTGT        |
| JAK3.21.2.JAK3.2_F  | chr19:17953750-17953911 | GAAAGCTTGCAAGGAGAACTC     |
| JAK3.21.2.JAK3.2_R  | chr19:17953750-17953911 | AGCAGGGTGAGTGTCTCA        |
| JAK3.7.1.JAK3.1_F   | chr19:17943604-17943750 | TGCCACCTTACCTTGC          |
| JAK3.7.1.JAK3.1_R   | chr19:17943604-17943750 | TGCTTACCCTGCCCATG         |

|                    |                         |                        |
|--------------------|-------------------------|------------------------|
| JAK3.7.2.JAK3.2_F  | chr19:17943478-17943623 | GCACCTGTATTGTGCGCCTA   |
| JAK3.7.2.JAK3.2_R  | chr19:17943478-17943623 | ATCTTCGAGGAGAGACACCT   |
| JAK3.17.1.JAK3.1_F | chr19:17951001-17951156 | ATTCAAACGTCACCTCCTCC   |
| JAK3.17.1.JAK3.1_R | chr19:17951001-17951156 | CATTCCTCTCACCTTCCC     |
| JAK3.2.1.JAK3.1_F  | chr19:17940839-17940998 | CCTTTCTTCTCAGTACAGAGAC |
| JAK3.2.1.JAK3.1_R  | chr19:17940839-17940998 | GATGATGGGATGTGAGCG     |
| JAK3.2.2.JAK3.2_F  | chr19:17940902-17941034 | GACTGGGAACTGAGGCTAG    |
| JAK3.2.2.JAK3.2_R  | chr19:17940902-17941034 | ACATGCGCTCCTCCTTG      |
| JAK3.22.1.JAK3.1_F | chr19:17954184-17954315 | TCAAACCCAGGCAGAAC      |
| JAK3.22.1.JAK3.1_R | chr19:17954184-17954315 | CACHTTCATCCCAGGGTTCT   |
| JAK3.1.1.JAK3.1_F  | chr19:17937562-17937725 | GGGCAGGAGCTATGAAAAG    |
| JAK3.1.1.JAK3.1_R  | chr19:17937562-17937725 | ATTATCTGTCCCCCGCC      |
| JAK3.1.2.JAK3.2_F  | chr19:17937459-17937593 | TCTTGAAGTAGAGGACCCTC   |
| JAK3.1.2.JAK3.2_R  | chr19:17937459-17937593 | GTGAGACTCATGCCCTCACT   |
| JAK3.18.1.JAK3.1_F | chr19:17952207-17952369 | AGGTCCTTACGTGATGGGG    |
| JAK3.18.1.JAK3.1_R | chr19:17952207-17952369 | TTTCACCTGGGCTCTGACG    |
| JAK3.18.2.JAK3.2_F | chr19:17952095-17952250 | GCAGGTGTGGTTTAAAACT    |
| JAK3.18.2.JAK3.2_R | chr19:17952095-17952250 | ACTTCTTCTGCAAGGAGGTG   |
| JAK3.23.1.JAK3.1_F | chr19:17954568-17954726 | AATTGTACAATCCCTGGGGG   |
| JAK3.23.1.JAK3.1_R | chr19:17954568-17954726 | GACTCAGGAGGGAGCTGAT    |
| JAK3.13.1.JAK3.1_F | chr19:17948729-17948872 | GACTCCAAAAGTCTGGTCCA   |
| JAK3.13.1.JAK3.1_R | chr19:17948729-17948872 | CTGTCCCCCTCACCATTCAG   |
| JAK3.16.1.JAK3.1_F | chr19:17950292-17950455 | AAGGGGCTCACCTTTGG      |
| JAK3.16.1.JAK3.1_R | chr19:17950292-17950455 | AACCCCTTGGTCTCTGA      |
| JAK3.16.2.JAK3.2_F | chr19:17950422-17950561 | CCAACCAGAAGGAGTTCC     |
| JAK3.16.2.JAK3.2_R | chr19:17950422-17950561 | CCAGACTCCGTCTCCAAAA    |
| JAK3.16.2.JAK3.3_F | chr19:17950268-17950401 | CAGATCAGCCACTCATTTCCA  |
| JAK3.16.2.JAK3.3_R | chr19:17950268-17950401 | GGAACCTTCCTTCTGGTTGG   |
| JAK3.6.1.JAK3.1_F  | chr19:17943348-17943508 | GGCCATAGCTGACACCA      |
| JAK3.6.1.JAK3.1_R  | chr19:17943348-17943508 | TATCCCCCAGGGCAACTTT    |
| JAK3.6.2.JAK3.2_F  | chr19:17943478-17943623 | GCACCTGTATTGTGCGCCTA   |
| JAK3.6.2.JAK3.2_R  | chr19:17943478-17943623 | ATCTTCGAGGAGAGACACCT   |
| JAK3.6.2.JAK3.3_F  | chr19:17943243-17943387 | TAATCACGTTCCCAGCCTAC   |
| JAK3.6.2.JAK3.3_R  | chr19:17943243-17943387 | CTTTCAGCGGGAGATTGAGA   |
| JAK3.3.1.JAK3.1_F  | chr19:17941288-17941436 | GTGGAGGGAGAAGAAGGCT    |
| JAK3.3.1.JAK3.1_R  | chr19:17941288-17941436 | CATCTCAAGACCTGTGCCCC   |
| JAK3.9.1.JAK3.1_F  | chr19:17945666-17945822 | TGAGGGGCTCTGACCTTAG    |
| JAK3.9.1.JAK3.1_R  | chr19:17945666-17945822 | GGATCCCTGATCCCACTTTC   |
| JAK3.9.2.JAK3.2_F  | chr19:17945559-17945699 | GAGAGGAGCAGTCGGTAATC   |
| JAK3.9.2.JAK3.2_R  | chr19:17945559-17945699 | CGGTCTGGGAAGTGTTTAGT   |
| JAK3.12.1.JAK3.1_F | chr19:17947883-17948031 | CTCAGAACAGAGGTGGGAAG   |
| JAK3.12.1.JAK3.1_R | chr19:17947883-17948031 | CATCTTCTCTCCCTTCCCAC   |
| JAK3.20.3.JAK3.1_F | chr19:17953235-17953400 | CACGTGGAAGGTCTCGG      |
| JAK3.20.3.JAK3.1_R | chr19:17953235-17953400 | ACAAGCCTGCCTACCC       |
| JAK3.20.4.JAK3.2_F | chr19:17953383-17953536 | AAGCTCAGGCCCTGGAT      |
| JAK3.20.4.JAK3.2_R | chr19:17953383-17953536 | AATGAGAGTCTGTGTGTGCC   |
| JAK3.20.5.JAK3.3_F | chr19:17953135-17953267 | GCCTCACCTCCTGTTCT      |
| JAK3.20.5.JAK3.3_R | chr19:17953135-17953267 | GCTCATGGCCAAGTACATCA   |
| JAK3.20.6.JAK3.4_F | chr19:17953065-17953216 | ACATCCCCCTACCACTCTCC   |
| JAK3.20.6.JAK3.4_R | chr19:17953065-17953216 | CGAGACCTTCCACGTGG      |
| JAK3.14.1.JAK3.1_F | chr19:17949072-17949204 | CATTTCCAGGGCCTCTTAC    |
| JAK3.14.1.JAK3.1_R | chr19:17949072-17949204 | TTTCTCCCTCATCTCTCCC    |
| JAK3.15.1.JAK3.1_F | chr19:17949969-17950107 | CGGTTCTACCAGGGATTCTG   |
| JAK3.15.1.JAK3.1_R | chr19:17949969-17950107 | AACCTTTAGGTCTGGCTTGA   |
| JAK3.8.1.JAK3.1_F  | chr19:17945394-17945538 | GGCACCTGAAGAGATGAGG    |
| JAK3.8.1.JAK3.1_R  | chr19:17945394-17945538 | GATTACCGACTGCTCCTCTC   |
| JAK3.8.2.JAK3.2_F  | chr19:17945346-17945505 | CTGGGCCCAATATGACATCA   |
| JAK3.8.2.JAK3.2_R  | chr19:17945346-17945505 | CCAATTTTATGAGGACCGGC   |
| JAK3.4.1.JAK3.1_F  | chr19:17942084-17942232 | CGGACCACGTAGTAGTCTTT   |
| JAK3.4.1.JAK3.1_R  | chr19:17942084-17942232 | TATCCTGGGATCCTCTCTGC   |
| JAK3.4.2.JAK3.2_F  | chr19:17941927-17942086 | AAGCTGCAGCGGAGGAA      |
| JAK3.4.2.JAK3.2_R  | chr19:17941927-17942086 | CTAAGCTGCTGCCGCTT      |
| JAK3.24.1.JAK3.1_F | chr19:17955043-17955202 | CCACTAGGGATGCACTCAC    |
| JAK3.24.1.JAK3.1_R | chr19:17955043-17955202 | CACCTCCAAGTGAAGAGACG   |
| JAK3.24.2.JAK3.2_F | chr19:17955199-17955351 | CATGAACGCTGAGGGATCA    |
| JAK3.24.2.JAK3.2_R | chr19:17955199-17955351 | CCTCCCAAAATGCTGTGATT   |
| JAK3.10.1.JAK3.1_F | chr19:17945892-17946032 | CTCCACCTCCAGGAACCTTAC  |

|                    |                         |                        |
|--------------------|-------------------------|------------------------|
| JAK3.10.1.JAK3.1_R | chr19:17945892-17946032 | GCATTTTCCTGTGTCTGGC    |
| JAK3.19.1.JAK3.1_F | chr19:17952457-17952618 | TCCTGCACCCACTAAAAATCT  |
| JAK3.19.1.JAK3.1_R | chr19:17952457-17952618 | GTTCATGGGCGTGGTTTG     |
| JAK3.19.2.JAK3.2_F | chr19:17952390-17952537 | GTCAGAGCCAGTGAAACC     |
| JAK3.19.2.JAK3.2_R | chr19:17952390-17952537 | CTGCGACTTTCAGAAATCG    |
| JAK3.5.1.JAK3.1_F  | chr19:17942463-17942610 | CAGCTGAATCCCCACAAGT    |
| JAK3.5.1.JAK3.1_R  | chr19:17942463-17942610 | GTGACAGATCCTGCCTTCTC   |
| TOP1.11.1.TOP1.1_F | chr20:39726838-39726995 | CGTTGTTTTTCTTTCATCTCCC |
| TOP1.11.1.TOP1.1_R | chr20:39726838-39726995 | TCCAGAATTCTCCAGAGGTT   |
| TOP1.21.1.TOP1.1_F | chr20:39751806-39751943 | CCATTGCTGAGTCACCCTAA   |
| TOP1.21.1.TOP1.1_R | chr20:39751806-39751943 | CACAGAACTCTGCCTCTTGA   |
| TOP1.7.1.TOP1.1_F  | chr20:39709736-39709889 | GGAGGCATCCAAGAGTTTGT   |
| TOP1.7.1.TOP1.1_R  | chr20:39709736-39709889 | CCCCAAAGGACCTAAGTCTC   |
| TOP1.17.1.TOP1.1_F | chr20:39744916-39745071 | TCGTGTGCTTGTCTCCTCC    |
| TOP1.17.1.TOP1.1_R | chr20:39744916-39745071 | CAAGGTCACCGGATACCATT   |
| TOP1.2.1.TOP1.1_F  | chr20:39658081-39658244 | TTTTTCCAGATCGAAGCGG    |
| TOP1.2.1.TOP1.1_R  | chr20:39658081-39658244 | AAAGGGGGTCAAGAGGC      |
| TOP1.2.2.TOP1.2_F  | chr20:39658245-39658404 | ATTGTTCCCATCGGGCC      |
| TOP1.2.2.TOP1.2_R  | chr20:39658245-39658404 | AAAAGAAAATGGCGCAGAGA   |
| TOP1.2.2.TOP1.3_F  | chr20:39657932-39658086 | AAGTTACAGTTCGAGGCAGG   |
| TOP1.2.2.TOP1.3_R  | chr20:39657932-39658086 | GGCACACTCACCATTCAATC   |
| TOP1.1.5.TOP1.1_F  | chr20:39657668-39657832 | TCGCGTCTCCCCCAC        |
| TOP1.1.5.TOP1.1_R  | chr20:39657668-39657832 | CTCCGGCCTGTCAAAGC      |
| TOP1.18.1.TOP1.1_F | chr20:39746797-39746950 | ACCCTCTTGCTACCATTGTT   |
| TOP1.18.1.TOP1.1_R | chr20:39746797-39746950 | GCAGACACAGTTCCTTCAT    |
| TOP1.16.1.TOP1.1_F | chr20:39743950-39744092 | GCAAGTTTCTTTAAGTTGGGG  |
| TOP1.16.1.TOP1.1_R | chr20:39743950-39744092 | CTCCCTTCAACATTGTGTGC   |
| TOP1.13.1.TOP1.1_F | chr20:39729841-39729999 | CACTATCCTCGTCTCTGTT    |
| TOP1.13.1.TOP1.1_R | chr20:39729841-39729999 | AGTGCAGCTCTCAACTATCC   |
| TOP1.6.6.TOP1.1_F  | chr20:39708710-39708846 | CTAGCACTCTGACCAGCAAT   |
| TOP1.6.6.TOP1.1_R  | chr20:39708710-39708846 | AACTCCTCCTTTTGTGTTTCAA |
| TOP1.3.1.TOP1.1_F  | chr20:39689978-39690132 | TGACCAGCTTGTCAAGGTAG   |
| TOP1.3.1.TOP1.1_R  | chr20:39689978-39690132 | ACTTGCTTGATTCCACCCTT   |
| TOP1.9.1.TOP1.1_F  | chr20:39721104-39721255 | AAATGAGGCTGTGCTTTGTC   |
| TOP1.9.1.TOP1.1_R  | chr20:39721104-39721255 | GCAGATTTCTTTTCTGGCC    |
| TOP1.12.3.TOP1.1_F | chr20:39728696-39728853 | ACTTTCTTGCTGTCTTCCAG   |
| TOP1.12.3.TOP1.1_R | chr20:39728696-39728853 | GTTGATGATTATATCCTCGGGC |
| TOP1.12.4.TOP1.2_F | chr20:39728852-39728996 | GCATGCTGAAGAGACGAATC   |
| TOP1.12.4.TOP1.2_R | chr20:39728852-39728996 | CGCATGAAATACTGTCTCTGC  |
| TOP1.15.1.TOP1.1_F | chr20:39742620-39742779 | TGGGCAGCTTGCTCTGA      |
| TOP1.15.1.TOP1.1_R | chr20:39742620-39742779 | CTTACTCGTTTCTCAACAGGG  |
| TOP1.15.2.TOP1.2_F | chr20:39742753-39742899 | GAGTTTGACTTCCTCGGGAA   |
| TOP1.15.2.TOP1.2_R | chr20:39742753-39742899 | ATGTTGCCCTGTCTCAAGTCA  |
| TOP1.15.2.TOP1.3_F | chr20:39742478-39742633 | GCTTGCACTGAGCCAAAATT   |
| TOP1.15.2.TOP1.3_R | chr20:39742478-39742633 | GCTGTTTCTCCTTCCCTCCTT  |
| TOP1.14.1.TOP1.1_F | chr20:39741418-39741575 | ACATTTGGGTTTGGGTCTTT   |
| TOP1.14.1.TOP1.1_R | chr20:39741418-39741575 | TAGACAATGCCGATGGGAAG   |
| TOP1.20.1.TOP1.1_F | chr20:39750636-39750795 | TGTTTCTTGAGGACTTTGCT   |
| TOP1.20.1.TOP1.1_R | chr20:39750636-39750795 | AAGGAGGGCTCAACACTTAC   |
| TOP1.8.1.TOP1.1_F  | chr20:39713058-39713208 | AAAAGTCCCTCCAGAAGTGT   |
| TOP1.8.1.TOP1.1_R  | chr20:39713058-39713208 | ACCCAGTGTGAGATGTAC     |
| TOP1.4.1.TOP1.1_F  | chr20:39704792-39704947 | CTACTCTGGGCTAACGCTTT   |
| TOP1.4.1.TOP1.1_R  | chr20:39704792-39704947 | CGTTCCTTCCCTCCCCTACTA  |
| TOP1.10.1.TOP1.1_F | chr20:39725848-39725981 | ACCTCACTTTTTGGAACCCAC  |
| TOP1.10.1.TOP1.1_R | chr20:39725848-39725981 | TTAACACATGGGCTACAGTAC  |
| TOP1.19.1.TOP1.1_F | chr20:39750296-39750453 | TCTCAGGTGGAGCCATTTTT   |
| TOP1.19.1.TOP1.1_R | chr20:39750296-39750453 | CTTTTCTCTACCAGCCCCAA   |
| TOP1.5.1.TOP1.1_F  | chr20:39706132-39706277 | GCCAGCTTGTGATCATGATG   |
| TOP1.5.1.TOP1.1_R  | chr20:39706132-39706277 | CGCAGCAGCAAAGTCTTAC    |
| JAK1.11.1.JAK1.1_F | chr1:65311182-65311337  | GGTGGGACCATTATGGACAT   |
| JAK1.11.1.JAK1.1_R | chr1:65311182-65311337  | CAGGTTCCAGACATGGCTAT   |
| JAK1.21.1.JAK1.1_F | chr1:65339053-65339210  | CTGGGCCCAAACCTTCCTAC   |
| JAK1.21.1.JAK1.1_R | chr1:65339053-65339210  | GGCATTTCATTTTCTGCCTT   |
| JAK1.7.1.JAK1.1_F  | chr1:65306927-65307083  | GCAGCACGGGTGTAACCTTA   |
| JAK1.7.1.JAK1.1_R  | chr1:65306927-65307083  | CTTGGGGAGAAACAGGAGC    |
| JAK1.2.5.JAK1.1_F  | chr1:65301084-65301242  | GTGGCCCATAGATACCTCAT   |
| JAK1.2.5.JAK1.1_R  | chr1:65301084-65301242  | TTCACCTTAATCTGTTTGGCA  |



|                    |                           |                           |
|--------------------|---------------------------|---------------------------|
| JAK1.2.6.JAK1.2_F  | chr1:65301018-65301160    | CTCTACCCATTGCTGGACAA      |
| JAK1.2.6.JAK1.2_R  | chr1:65301018-65301160    | AAAATGATAGGCCCAACCCA      |
| JAK1.17.1.JAK1.1_F | chr1:65325792-65325946    | AGGTTCTAGGACCAACCAGA      |
| JAK1.17.1.JAK1.1_R | chr1:65325792-65325946    | GGGAATTCTCTCTCTCAACA      |
| JAK1.17.2.JAK1.2_F | chr1:65325733-65325880    | AATGATGACATGCCCCATCA      |
| JAK1.17.2.JAK1.2_R | chr1:65325733-65325880    | CTGGTAGATGGCTACTTCCG      |
| JAK1.22.1.JAK1.1_F | chr1:65344705-65344851    | TACCAGGTCAGTACTTCCCA      |
| JAK1.22.1.JAK1.1_R | chr1:65344705-65344851    | CCGCCTTGATTTTCTGATGT      |
| JAK1.1.7.JAK1.1_F  | chr1:65300210-65300360    | TTGTTGCAGGAGAAGGACTT      |
| JAK1.1.7.JAK1.1_R  | chr1:65300210-65300360    | CCCAGATCTAACATTTTTACTGTTG |
| JAK1.18.1.JAK1.1_F | chr1:65330547-65330702    | TGAGTGATTTTCAGGGAAGTAAG   |
| JAK1.18.1.JAK1.1_R | chr1:65330547-65330702    | GCAGTACCTTTTACCAATAGA     |
| JAK1.18.2.JAK1.2_F | chr1:65330426-65330557    | GGAAGTACGCAATTTCTCCCT     |
| JAK1.18.2.JAK1.2_R | chr1:65330426-65330557    | AACAAGATCCGGGAAGAGTG      |
| JAK1.16.1.JAK1.1_F | chr1:65323311-65323465    | GACACCTCATGGCTGTATGG      |
| JAK1.16.1.JAK1.1_R | chr1:65323311-65323465    | CCTTTGCCCTACTTCTCCCTC     |
| JAK1.13.1.JAK1.1_F | chr1:65313209-65313358    | GGAGGAGTTTACAGGGAAGAC     |
| JAK1.13.1.JAK1.1_R | chr1:65313209-65313358    | CCTTCTGCTTCTTCCCTCAG      |
| JAK1.23.1.JAK1.1_F | chr1:65348959-65349119    | GCAGCTGCCAGTACTCA         |
| JAK1.23.1.JAK1.1_R | chr1:65348959-65349119    | CTGCAATGCCATGGCTTTC       |
| JAK1.23.2.JAK1.2_F | chr1:65349065-65349212    | GAAGATCACCTCCACCCTG       |
| JAK1.23.2.JAK1.2_R | chr1:65349065-65349212    | AGAACACTCCCTTTTGCCAT      |
| JAK1.6.1.JAK1.1_F  | chr1:65305285-65305445    | CCCCAGCCTTGCATAACATA      |
| JAK1.6.1.JAK1.1_R  | chr1:65305285-65305445    | GGTTGAGCTCTGAGGTAT        |
| JAK1.6.2.JAK1.2_F  | chr1:65305394-65305536    | GTGGTTACCTCCACTCTCAG      |
| JAK1.6.2.JAK1.2_R  | chr1:65305394-65305536    | TGAGGAGCAAGACTTCTGTG      |
| JAK1.3.1.JAK1.1_F  | chr1:65301764-65301920    | TGGTACTGGATTCAAATGAAG     |
| JAK1.3.1.JAK1.1_R  | chr1:65301764-65301920    | GCCTCCAGGAAATGAAGTT       |
| JAK1.9.1.JAK1.1_F  | chr1:65309746-65309905    | CGGGAACACCTGCTCA          |
| JAK1.9.1.JAK1.1_R  | chr1:65309746-65309905    | TCCATCAGTGTGCTGTGTGT      |
| JAK1.12.1.JAK1.1_F | chr1:65312274-65312426    | GAAGAGCCTCCACCATCTC       |
| JAK1.12.1.JAK1.1_R | chr1:65312274-65312426    | ACATTCCTATGTCTGCTCG       |
| JAK1.14.1.JAK1.1_F | chr1:65316437-65316598    | ATCCCCAAGCTGCTCCAT        |
| JAK1.14.1.JAK1.1_R | chr1:65316437-65316598    | CAGACTCCCCCAATCTCTTC      |
| JAK1.20.1.JAK1.1_F | chr1:65334994-65335158    | GCCAGTGGGAAGCTTTAC        |
| JAK1.20.1.JAK1.1_R | chr1:65334994-65335158    | TCTCCCTTGCTCCTA           |
| JAK1.15.1.JAK1.1_F | chr1:65321191-65321351    | TGGCACAGGGAGACGAA         |
| JAK1.15.1.JAK1.1_R | chr1:65321191-65321351    | TGCCCAGAAGCAGTTC AAG      |
| JAK1.15.2.JAK1.2_F | chr1:65321277-65321420    | TTCTTGAGGTGGCTCATGAG      |
| JAK1.15.2.JAK1.2_R | chr1:65321277-65321420    | TTACATACCCATGCCTGACC      |
| JAK1.8.1.JAK1.1_F  | chr1:65307127-65307285    | GTTAAAGCAGCACATGGCAG      |
| JAK1.8.1.JAK1.1_R  | chr1:65307127-65307285    | ATGTGCCCTCTTGTTTTACA      |
| JAK1.4.4.JAK1.1_F  | chr1:65303565-65303722    | CCAGAAAGGCCTATTA AACA     |
| JAK1.4.4.JAK1.1_R  | chr1:65303565-65303722    | GCAGCAAGAAATGCTTGT        |
| JAK1.4.5.JAK1.2_F  | chr1:65303654-65303799    | GGTCATCCTTGACGGTGTAA      |
| JAK1.4.5.JAK1.2_R  | chr1:65303654-65303799    | GCAATGTGCTTGACTTTTACT     |
| JAK1.24.1.JAK1.1_F | chr1:65351873-65352007    | CAATAGCCCTACAGCCTCAA      |
| JAK1.24.1.JAK1.1_R | chr1:65351873-65352007    | TAGCGCTTCTCTGAAGTAGC      |
| JAK1.19.1.JAK1.1_F | chr1:65332549-65332709    | ACTGCCAACAGCCACTTAC       |
| JAK1.19.1.JAK1.1_R | chr1:65332549-65332709    | CTTGGCTACCTTGGAACTT       |
| JAK1.19.2.JAK1.2_F | chr1:65332754-65332911    | ACCTTCAGGTCATGCGTG        |
| JAK1.19.2.JAK1.2_R | chr1:65332754-65332911    | CCTGTACATGAAAAGGAGATGT    |
| JAK1.19.3.JAK1.3_F | chr1:65332622-65332760    | AGTAGAGAACGTTTCCACCG      |
| JAK1.19.3.JAK1.3_R | chr1:65332622-65332760    | CAAGACCATTGTGACAGCA       |
| JAK1.10.1.JAK1.1_F | chr1:65310436-65310589    | GGAAGAGAGGGGAGACACA       |
| JAK1.10.1.JAK1.1_R | chr1:65310436-65310589    | GAGCAGCTTGGCTAAACTGT      |
| JAK1.5.1.JAK1.1_F  | chr1:65304125-65304282    | GTGCCTGATGTCTTAATCTGT     |
| JAK1.5.1.JAK1.1_R  | chr1:65304125-65304282    | CCTCAGACTGATGGATGTTTT     |
| ATM.33.15.ATM.1_F  | chr11:108170421-108170573 | GATCTCTTACCTATGACTCTACTGA |
| ATM.33.15.ATM.1_R  | chr11:108170421-108170573 | GTTATTACAGGTAGGTCAGCATT   |
| ATM.33.17.ATM.2_F  | chr11:108170534-108170688 | TGCATCTTATACCAAGCCCC      |
| ATM.33.17.ATM.2_R  | chr11:108170534-108170688 | GGACAAAGCTTTAGTTACTGAGA   |
| ATM.32.8.ATM.1_F   | chr11:108167981-108168133 | ACAAAAGTGTGTCTTTCATGCT    |
| ATM.32.8.ATM.1_R   | chr11:108167981-108168133 | CCGCAGTTGACTGAAATGTC      |
| ATM.21.1.ATM.1_F   | chr11:108143447-108143604 | AACCACAGTTCTTTCCCGT       |
| ATM.21.1.ATM.1_R   | chr11:108143447-108143604 | CCATCTGCAGCATTC A AAT     |
| ATM.7.8.ATM.1_F    | chr11:108117701-108117856 | TTTGATTACAGGTGCTTATGA     |

|                   |                           |                             |
|-------------------|---------------------------|-----------------------------|
| ATM.7.8.ATM.1_R   | chr11:108117701-108117856 | TGTGACATGACCTACTTACTGT      |
| ATM.7.9.ATM.2_F   | chr11:108117648-108117791 | GGGAGCTAGCAGTGTAACA         |
| ATM.7.9.ATM.2_R   | chr11:108117648-108117791 | TGACGGCAATATTACGAAATCC      |
| ATM.26.8.ATM.1_F  | chr11:108158337-108158493 | GCCTTGCAGATFGATCACT         |
| ATM.26.8.ATM.1_R  | chr11:108158337-108158493 | AGGTGTCAACCAATAAACTTCT      |
| ATM.26.9.ATM.2_F  | chr11:108158278-108158423 | GCCTTTGAGCTGTCTTGAC         |
| ATM.26.9.ATM.2_R  | chr11:108158278-108158423 | CCCTGAAAAGTCACAGAGGT        |
| ATM.2.24.ATM.1_F  | chr11:108098429-108098668 | AGAGCTACAGAACGAAAGGTAGT     |
| ATM.2.24.ATM.1_R  | chr11:108098429-108098668 | ACACACAAAAGTAATATCACAAACAGA |
| ATM.17.1.ATM.1_F  | chr11:108139157-108139316 | GGTGCCATTAATCCTTTAGCT       |
| ATM.17.1.ATM.1_R  | chr11:108139157-108139316 | ATATGCAGGTGGAGGGATT         |
| ATM.17.2.ATM.2_F  | chr11:108139316-108139457 | CTAGCACGCTAGAACCTACC        |
| ATM.17.2.ATM.2_R  | chr11:108139316-108139457 | TTCCAAGTCTCAGGTTCA          |
| ATM.17.2.ATM.3_F  | chr11:108139110-108139250 | GCTGTTGTGCCCTTCTCTTA        |
| ATM.17.2.ATM.3_R  | chr11:108139110-108139250 | CCGAATATCAGCTGCCCTAA        |
| ATM.1.1.ATM.1_F   | chr11:108098352-108098508 | GTGTGTTCTGAAATTTGTGAACC     |
| ATM.1.1.ATM.1_R   | chr11:108098352-108098508 | CAGGCGCTTAAATTTCTCAAC       |
| ATM.18.20.ATM.1_F | chr11:108141767-108141917 | GTAAATGATTTGTGGATAAACCTGA   |
| ATM.18.20.ATM.1_R | chr11:108141767-108141917 | GCCTAACAGAACACATCAGTTATT    |
| ATM.30.22.ATM.1_F | chr11:108163991-108164144 | ACAGTAAGTTTTGTGGCTTACT      |
| ATM.30.22.ATM.1_R | chr11:108163991-108164144 | TTTGCTGAGTAATACGCAAATC      |
| ATM.30.23.ATM.2_F | chr11:108164135-108164258 | TAGATCCTTTTCTGACCATGT       |
| ATM.30.23.ATM.2_R | chr11:108164135-108164258 | TGCTAGAGCATTACAGATTTTTGA    |
| ATM.16.3.ATM.1_F  | chr11:108137871-108138023 | CTCCTGCAAGAAGCCATCTT        |
| ATM.16.3.ATM.1_R  | chr11:108137871-108138023 | TCGTTTGCATCACTAACACT        |
| ATM.16.4.ATM.2_F  | chr11:108137989-108138118 | AATGGAGGTGGAGGATCAGT        |
| ATM.16.4.ATM.2_R  | chr11:108137989-108138118 | GAGGCCTCTTATACTGCCAA        |
| ATM.44.10.ATM.1_F | chr11:108191995-108192130 | TTCCCTGAAAACCTCTTCTTT       |
| ATM.44.10.ATM.1_R | chr11:108191995-108192130 | TACCTTGAGAAAAGCTCCCC        |
| ATM.44.11.ATM.2_F | chr11:108192130-108192265 | ATTGGAGAGCTGGAAAGCAT        |
| ATM.44.11.ATM.2_R | chr11:108192130-108192265 | CACCCACTTCAGCCTTCTAA        |
| ATM.55.1.ATM.1_F  | chr11:108206582-108206735 | TATTTCTGAAGGGCCGTGATG       |
| ATM.55.1.ATM.1_R  | chr11:108206582-108206735 | CACTTCACCCAACCAATGG         |
| ATM.55.2.ATM.2_F  | chr11:108206496-108206634 | AGATTGGTTTGAGTGCCCTT        |
| ATM.55.2.ATM.2_R  | chr11:108206496-108206634 | GTTTCCGTGTTTCTCTGCAG        |
| ATM.25.17.ATM.1_F | chr11:108155079-108155230 | ACAGACTGCTTTCCAAAGATTC      |
| ATM.25.17.ATM.1_R | chr11:108155079-108155230 | GGTTATATCTCATATCATTGAGGGA   |
| ATM.25.24.ATM.2_F | chr11:108154868-108155109 | AAAGTATGATACTTTAATGCTGATGGT |
| ATM.25.24.ATM.2_R | chr11:108154868-108155109 | TCCCACTGTCTCTGGTACCC        |
| ATM.27.3.ATM.1_F  | chr11:108159655-108159812 | TGGAAGTTCACTGGTCTATGA       |
| ATM.27.3.ATM.1_R  | chr11:108159655-108159812 | ACAGGGCTTTTGAAAGAAT         |
| ATM.27.24.ATM.2_F | chr11:108159723-108159969 | GGGATTTGGATCCTGCTCCT        |
| ATM.27.24.ATM.2_R | chr11:108159723-108159969 | TGCTGACAAGTAAAATACCATTTAAAC |
| ATM.28.19.ATM.1_F | chr11:108160302-108160452 | GTAGCCGAGTATCTAATTAACAAG    |
| ATM.28.19.ATM.1_R | chr11:108160302-108160452 | AGCTCCTCCTAAGCCACTTT        |
| ATM.28.20.ATM.2_F | chr11:108160444-108160565 | CACCTGTTTGTAGTTTATTACTGA    |
| ATM.28.20.ATM.2_R | chr11:108160444-108160565 | AAAAACAGGAAGAACAGGATAGA     |
| ATM.40.20.ATM.1_F | chr11:108186540-108186693 | TCCTTCTCAATTTTTGTTGTTTCC    |
| ATM.40.20.ATM.1_R | chr11:108186540-108186693 | AGCTTTGGGTTTTACACACAC       |
| ATM.57.1.ATM.1_F  | chr11:108216526-108216665 | GTCTTCATGGATGTTTGCCA        |
| ATM.57.1.ATM.1_R  | chr11:108216526-108216665 | ACCTGCCAAACAACAAAGTG        |
| ATM.57.2.ATM.2_F  | chr11:108216380-108216535 | CCTGTTTCATCTTTATTGCCCC      |
| ATM.57.2.ATM.2_R  | chr11:108216380-108216535 | GCAGAAGTAACGGAAAACCTGG      |
| ATM.61.1.ATM.1_F  | chr11:108235814-108235959 | TGTTCTCTCTGTTTAGTCCCT       |
| ATM.61.1.ATM.1_R  | chr11:108235814-108235959 | ACTGACAACAGGACCTTCTT        |
| ATM.61.2.ATM.2_F  | chr11:108235694-108235823 | TGTGCATGATGTTTGTGCC         |
| ATM.61.2.ATM.2_R  | chr11:108235694-108235823 | ATGGTCCAGTCAAAGAGTGG        |
| ATM.20.20.ATM.1_F | chr11:108143213-108143362 | TCAGTGAGTTTTCTGAGTGCCT      |
| ATM.20.20.ATM.1_R | chr11:108143213-108143362 | GACTGCTTTAAAATTTTCAATGGAG   |
| ATM.14.14.ATM.1_F | chr11:108128194-108128319 | AACTGGAATTTGCATTTTTCCT      |
| ATM.14.14.ATM.1_R | chr11:108128194-108128319 | AATCTTACCTTGGTACAGTTGC      |
| ATM.14.24.ATM.2_F | chr11:108128316-108128444 | TGCAGCTATGTACACGTTGC        |
| ATM.14.24.ATM.2_R | chr11:108128316-108128444 | TGAGGCAGGAGAATTGCTGG        |
| ATM.59.16.ATM.1_F | chr11:108224472-108224607 | AGCTGTCAAACCTCCTAACT        |
| ATM.59.16.ATM.1_R | chr11:108224472-108224607 | CCCTCCTTTACTTCATATCACTTAC   |
| ATM.49.1.ATM.1_F  | chr11:108200981-108201140 | AGAGCTGGAGTTGGATGAA         |
| ATM.49.1.ATM.1_R  | chr11:108200981-108201140 | GAGTAACACTTGCCCTCATCA       |

|                   |                           |                              |
|-------------------|---------------------------|------------------------------|
| ATM.49.2.ATM.2_F  | chr11:108201106-108201238 | TTCCGACTTTTGTTCCTCTG         |
| ATM.49.2.ATM.2_R  | chr11:108201106-108201238 | CTGGACCAAGTGTAGGAAT          |
| ATM.49.2.ATM.3_F  | chr11:108200847-108200990 | TTTTCCCTGGGATAAAAACCC        |
| ATM.49.2.ATM.3_R  | chr11:108200847-108200990 | ACGATCCTCTTTCAGTGCAC         |
| ATM.24.17.ATM.1_F | chr11:108153504-108153656 | GAAGACTTTATGGCATCTCATTTAG    |
| ATM.24.17.ATM.1_R | chr11:108153504-108153656 | AGGGGACTTGCTAAGTATTGT        |
| ATM.24.18.ATM.2_F | chr11:108153362-108153508 | TGTTGTTCTAGGTCCTACTCT        |
| ATM.24.18.ATM.2_R | chr11:108153362-108153508 | GATTTAGCCATTCCAAAACCAG       |
| ATM.10.3.ATM.1_F  | chr11:108122549-108122704 | GCTTGCTTTTCAACAATTGTCC       |
| ATM.10.3.ATM.1_R  | chr11:108122549-108122704 | TTCTAAGTCACCCTCTAACTGA       |
| ATM.10.8.ATM.2_F  | chr11:108122630-108122762 | CCAGGAACGGTAAAAATGGG         |
| ATM.10.8.ATM.2_R  | chr11:108122630-108122762 | GCAGCATGCTAATGAACCTTAAA      |
| ATM.31.3.ATM.1_F  | chr11:108165625-108165776 | CACAGGCTTAACCAATACGTG        |
| ATM.31.3.ATM.1_R  | chr11:108165625-108165776 | AAATTAGCACCCCTGAGAAGC        |
| ATM.31.4.ATM.2_F  | chr11:108165709-108165853 | TGCACTTCCATTGACAAGAC         |
| ATM.31.4.ATM.2_R  | chr11:108165709-108165853 | GTGACAATGAAACCAAGAGCA        |
| ATM.35.3.ATM.1_F  | chr11:108173543-108173696 | GGAAAGGTACAATGATTCCAC        |
| ATM.35.3.ATM.1_R  | chr11:108173543-108173696 | TGCCTCCACTGTCCAAAAA          |
| ATM.35.4.ATM.2_F  | chr11:108173696-108173850 | GGATAAAGACACTGACTTGTGC       |
| ATM.35.4.ATM.2_R  | chr11:108173696-108173850 | TACAACAGTTTGAGTGGGGG         |
| ATM.11.24.ATM.1_F | chr11:108123525-108123758 | GGCTTTTGGTCTTCTAAGTGAAGC     |
| ATM.11.24.ATM.1_R | chr11:108123525-108123758 | TCCTGGCTAACAGTTGCAA          |
| ATM.53.24.ATM.1_F | chr11:108204588-108204840 | TGCTGTTCCTCAGTTTGTCACT       |
| ATM.53.24.ATM.1_R | chr11:108204588-108204840 | AGGGCTTGGCAAAGGAAAT          |
| ATM.48.1.ATM.1_F  | chr11:108199768-108199927 | GCAGTAGAAGTTGCTGGAAA         |
| ATM.48.1.ATM.1_R  | chr11:108199768-108199927 | TGTTCCCTAAGGAGACCTAC         |
| ATM.48.2.ATM.2_F  | chr11:108199913-108200067 | ACAAGCAAGCTCTCCTGAAA         |
| ATM.48.2.ATM.2_R  | chr11:108199913-108200067 | TAAGCCGACCTTTAGAGCTC         |
| ATM.48.2.ATM.3_F  | chr11:108199618-108199773 | GGTTGGACAAGTTTGAAT           |
| ATM.48.2.ATM.3_R  | chr11:108199618-108199773 | AGCTCATCACTACTTCTCCA         |
| ATM.22.13.ATM.1_F | chr11:108150213-108150357 | TGTTTGTGTTGCTTGCTTGT         |
| ATM.22.13.ATM.1_R | chr11:108150213-108150357 | AGCAAGCATATGATAACAGCA        |
| ATM.42.1.ATM.1_F  | chr11:108188117-108188276 | TAGGCCTTGCAAAATTTGGG         |
| ATM.42.1.ATM.1_R  | chr11:108188117-108188276 | AGAATGAGGAGAGAGGCAAA         |
| ATM.42.2.ATM.2_F  | chr11:108187972-108188116 | CACCACACCCAGCTGATATT         |
| ATM.42.2.ATM.2_R  | chr11:108187972-108188116 | ACGGAAAGAATATGGCAGAGT        |
| ATM.46.1.ATM.1_F  | chr11:108196843-108196968 | AATTCAGTTAGCTGTGGAGTCT       |
| ATM.46.1.ATM.1_R  | chr11:108196843-108196968 | ACAGTAAAACTAATCCAGCC         |
| ATM.46.2.ATM.2_F  | chr11:108196709-108196860 | TCAATGAATGGTAGTTGCTGC        |
| ATM.46.2.ATM.2_R  | chr11:108196709-108196860 | TGCCCAGAATACTTGTGCTT         |
| ATM.13.24.ATM.1_F | chr11:108126842-108127089 | CACCTTAACTCAGTTAACTGAACT     |
| ATM.13.24.ATM.1_R | chr11:108126842-108127089 | ACATTTCAATTCAAATTTATCCGAAACT |
| ATM.23.20.ATM.1_F | chr11:108151762-108151916 | CCCTGAAACTTTGGATGAAATTT      |
| ATM.23.20.ATM.1_R | chr11:108151762-108151916 | GTGACCTAAGGAAGCTTCTAAT       |
| ATM.23.21.ATM.2_F | chr11:108151660-108151812 | TCGGAGTTCAGTTGGGATT          |
| ATM.23.21.ATM.2_R | chr11:108151660-108151812 | CTGTTTTTCGCAGATAGGGC         |
| ATM.29.6.ATM.1_F  | chr11:108163324-108163481 | CAGAACTTACTGGTTGTGTTG        |
| ATM.29.6.ATM.1_R  | chr11:108163324-108163481 | TGCTCATACACAAGGGGTAT         |
| ATM.29.8.ATM.2_F  | chr11:108163397-108163527 | AGCTTCTCCCTTTGTTGTGA         |
| ATM.29.8.ATM.2_R  | chr11:108163397-108163527 | ACCATTTTGAAGATGAGTCAGA       |
| ATM.6.3.ATM.1_F   | chr11:108115494-108115647 | CCCCCTGTTATACCCAGTTG         |
| ATM.6.3.ATM.1_R   | chr11:108115494-108115647 | CATTAAGCCTATGTTGAGTCCA       |
| ATM.6.17.ATM.2_F  | chr11:108115641-108115784 | TGAAATTTCTCCCACTTTGCT        |
| ATM.6.17.ATM.2_R  | chr11:108115641-108115784 | GACTTCTATGTTTGAATGAAGAAGC    |
| ATM.50.24.ATM.1_F | chr11:108202085-108202287 | ACCCTTGTGCTAATAGAGGAGC       |
| ATM.50.24.ATM.1_R | chr11:108202085-108202287 | TGTGGTTGATTTTCAGGTTTACT      |
| ATM.39.1.ATM.1_F  | chr11:108183137-108183291 | GAGGTGTTCTTGTGACAAACA        |
| ATM.39.1.ATM.1_R  | chr11:108183137-108183291 | ACATGGCATCTGTACAGTGT         |
| ATM.3.10.ATM.1_F  | chr11:108099888-108100039 | TCAACGAGTTTCTGAAATTCG        |
| ATM.3.10.ATM.1_R  | chr11:108099888-108100039 | ACATCACTTACTTCTGTTTGCA       |
| ATM.3.12.ATM.2_F  | chr11:108099960-108100087 | ATGTCTGAGAATAGCAAACCA        |
| ATM.3.12.ATM.2_R  | chr11:108099960-108100087 | AACTCACGGACAGTAATCT          |
| ATM.36.3.ATM.1_F  | chr11:108175388-108175540 | CTCAAACCTATTGGGTGGATTTG      |
| ATM.36.3.ATM.1_R  | chr11:108175388-108175540 | GTTGTGGATCGGCTCGTGT          |
| ATM.36.4.ATM.2_F  | chr11:108175509-108175643 | GCTTCTACACATGTTTCAGGG        |
| ATM.36.4.ATM.2_R  | chr11:108175509-108175643 | AGTGCTTTTAGTGGGATCCA         |
| ATM.51.17.ATM.1_F | chr11:108202636-108202777 | AGAATTTCAATGGATCACCCC        |

|                   |                           |                            |
|-------------------|---------------------------|----------------------------|
| ATM.51.17.ATM.1_R | chr11:108202636-108202777 | CACACTTCTAAAAGGTACGTATGT   |
| ATM.51.18.ATM.2_F | chr11:108202510-108202656 | GCTCTACCCACTGCAGTATC       |
| ATM.51.18.ATM.2_R | chr11:108202510-108202656 | TTTGCATTTGCTAAGGCCAG       |
| ATM.9.1.ATM.1_F   | chr11:108121538-108121698 | ACCCCAACAGCGACATG          |
| ATM.9.1.ATM.1_R   | chr11:108121538-108121698 | CTCCAAGTAAGCCAAAGTTTTC     |
| ATM.9.2.ATM.2_F   | chr11:108121689-108121844 | TCGTGGTATAAGTTCTGAGCA      |
| ATM.9.2.ATM.2_R   | chr11:108121689-108121844 | ATGTGAGTGTGTGTGTCT         |
| ATM.9.20.ATM.3_F  | chr11:108121393-108121537 | CCTTTTAGTTTGTAAATGTGATGGA  |
| ATM.9.20.ATM.3_R  | chr11:108121393-108121537 | CACATATGGTGTACGTTCCC       |
| ATM.58.17.ATM.1_F | chr11:108217990-108218144 | GGAATCAGTGATTTTCAGATTGTTTG |
| ATM.58.17.ATM.1_R | chr11:108217990-108218144 | GGTAGGCAAACAACATTCCA       |
| ATM.12.1.ATM.1_F  | chr11:108124551-108124710 | ACTTTCTTGAAGTGAAACACCAC    |
| ATM.12.1.ATM.1_R  | chr11:108124551-108124710 | CCAGAAGACAGCGATCCA         |
| ATM.12.2.ATM.2_F  | chr11:108124683-108124825 | ACCAGTCCAGTATTGGCTTC       |
| ATM.12.2.ATM.2_R  | chr11:108124683-108124825 | CTGCCCTATTTCTCCTTCC        |
| ATM.12.2.ATM.3_F  | chr11:108124510-108124662 | GGCAAAGCATTAGGTACTTGG      |
| ATM.12.2.ATM.3_R  | chr11:108124510-108124662 | GAAGCCAATACTGGACTGGT       |
| ATM.41.1.ATM.1_F  | chr11:108186715-108186850 | GTGTGTGTA AAAACCCAAAGCT    |
| ATM.41.1.ATM.1_R  | chr11:108186715-108186850 | TGGCTTACCAAATCTGGGA        |
| ATM.15.1.ATM.1_F  | chr11:108129657-108129809 | GATAGAGAAAACACTGTCTGCC     |
| ATM.15.1.ATM.1_R  | chr11:108129657-108129809 | TGATAGCAAACAGGAAGCA        |
| ATM.47.1.ATM.1_F  | chr11:108198334-108198487 | CAGTTGGGTACAGTCATGGT       |
| ATM.47.1.ATM.1_R  | chr11:108198334-108198487 | AGGGTTGCTCCAAAATCTT        |
| ATM.8.6.ATM.1_F   | chr11:108119621-108119760 | GCGAAACTCTGGCTCAAAA        |
| ATM.8.6.ATM.1_R   | chr11:108119621-108119760 | ATTACTTCCAGCCTAGTTCT       |
| ATM.8.7.ATM.2_F   | chr11:108119756-108119900 | GTGTCCCTTGCAAAGGAAG        |
| ATM.8.7.ATM.2_R   | chr11:108119756-108119900 | TGTTGAGATGAAAGGATTC        |
| ATM.38.1.ATM.1_F  | chr11:108180930-108181081 | ATGATGCTTCTGGCTGGAT        |
| ATM.38.1.ATM.1_R  | chr11:108180930-108181081 | ACCCTTATTGAGACAATGCCA      |
| ATM.38.2.ATM.2_F  | chr11:108180807-108180940 | TCTGTTAAGCAGTCACTACCA      |
| ATM.38.2.ATM.2_R  | chr11:108180807-108180940 | GAGCTACCTTGGCAACTTCT       |
| ATM.52.1.ATM.1_F  | chr11:108203505-108203658 | ATAGGATCGAACAGAGGCTG       |
| ATM.52.1.ATM.1_R  | chr11:108203505-108203658 | ACAGAGAGTAACACAGCAAGA      |
| ATM.52.8.ATM.2_F  | chr11:108203398-108203548 | TCCATTGTCTAGATTTGTGCA      |
| ATM.52.8.ATM.2_R  | chr11:108203398-108203548 | AGTGCCTCAACACTTCTGAC       |
| ATM.4.8.ATM.1_F   | chr11:108106409-108106565 | TGAAATAGGAGCACCTAGGC       |
| ATM.4.8.ATM.1_R   | chr11:108106409-108106565 | CACAAACAACAACCTTCAAAAC     |
| ATM.4.9.ATM.2_F   | chr11:108106348-108106476 | AGTTGCCATTCCAAGTGTCT       |
| ATM.4.9.ATM.2_R   | chr11:108106348-108106476 | GTATGTTGCTACAATCAGCTCC     |
| ATM.60.5.ATM.1_F  | chr11:108225503-108225661 | CGTTGACAACATTGGTGTGT       |
| ATM.60.5.ATM.1_R  | chr11:108225503-108225661 | TCACATCAGTGACTTCCTGA       |
| ATM.34.1.ATM.1_F  | chr11:108172402-108172561 | GTTCGATCAGCAGCTGTATC       |
| ATM.34.1.ATM.1_R  | chr11:108172402-108172561 | CCCACAGCAAACAGAACTGT       |
| ATM.34.2.ATM.2_F  | chr11:108172327-108172467 | CAGTGGAGGTTAACATTCATCA     |
| ATM.34.2.ATM.2_R  | chr11:108172327-108172467 | GATAGGCCAGCATTGGATCT       |
| ATM.56.1.ATM.1_F  | chr11:108213957-108214100 | CTGTAACTCCAGGTGGTCC        |
| ATM.56.1.ATM.1_R  | chr11:108213957-108214100 | CCTTTAATTTTGGGTGTCACTC     |
| ATM.56.2.ATM.2_F  | chr11:108213822-108213975 | CCTCCAAGGAGCTTTGTCTT       |
| ATM.56.2.ATM.2_R  | chr11:108213822-108213975 | CCTGTGCACCAATCAAGAAC       |
| ATM.37.1.ATM.1_F  | chr11:108178584-108178720 | AGGAAGAAGTGTGTAAGCA        |
| ATM.37.1.ATM.1_R  | chr11:108178584-108178720 | AACGTAAGAAGCAACACTCA       |
| ATM.45.1.ATM.1_F  | chr11:108196047-108196206 | TGGCATTGAGATCAGTCACA       |
| ATM.45.1.ATM.1_R  | chr11:108196047-108196206 | GTGTTTGGTGAGAAATGTCT       |
| ATM.45.2.ATM.2_F  | chr11:108196177-108196328 | TGGAGATCCTGATGGA AAAAGG    |
| ATM.45.2.ATM.2_R  | chr11:108196177-108196328 | TCCCTCAGGCTTTCTGTTTT       |
| ATM.45.2.ATM.3_F  | chr11:108196033-108196162 | TGAAC TCTATGTCGTGGCAT      |
| ATM.45.2.ATM.3_R  | chr11:108196033-108196162 | GTCCATTTCTTTTTCCATCAGG     |
| ATM.43.24.ATM.1_F | chr11:108190616-108190825 | AAATTTTGTCTTTGGTGAAGCT     |
| ATM.43.24.ATM.1_R | chr11:108190616-108190825 | AGTTTTCAGAAAAGAAGCCATGACA  |
| ATM.19.1.ATM.1_F  | chr11:108141988-108142136 | TTTACCACAGCAATGTGTGT       |
| ATM.19.1.ATM.1_R  | chr11:108141988-108142136 | GGACCACAAAATAGACTGTACC     |
| ATM.19.2.ATM.2_F  | chr11:108141841-108141994 | GAAGAGTACCCCTTGCCAAAT      |
| ATM.19.2.ATM.2_R  | chr11:108141841-108141994 | AACATCTTGGTCACGACGAT       |
| ATM.62.1.ATM.1_F  | chr11:108236091-108236246 | CAACAAAGTAGCTGAACGTGT      |
| ATM.62.1.ATM.1_R  | chr11:108236091-108236246 | GGCTGAATGAAAGGTAATTCA      |
| ATM.62.2.ATM.2_F  | chr11:108235955-108236113 | CGAAATCTCAGGTGAGCAGT       |
| ATM.62.2.ATM.2_R  | chr11:108235955-108236113 | GCCTTCTTCCACTCCTTTCA       |

|                      |                           |                          |
|----------------------|---------------------------|--------------------------|
| ATM.5.1.ATM.1_F      | chr11:108114731-108114887 | CTGAAACCTTCACAAGATGTTTC  |
| ATM.5.1.ATM.1_R      | chr11:108114731-108114887 | ACATGGTCTTGCAAGATCAA     |
| ATM.5.17.ATM.2_F     | chr11:108114601-108114741 | CCTTTTTCTGTATGGGATTATGGA |
| ATM.5.17.ATM.2_R     | chr11:108114601-108114741 | ACAGCATGAATTATCTTAGCCAC  |
| ATM.54.1.ATM.1_F     | chr11:108205716-108205860 | GTGGACCACACAGGAGAATA     |
| ATM.54.1.ATM.1_R     | chr11:108205716-108205860 | TCATCCTAAACTCTAAGGGC     |
| ATM.54.2.ATM.2_F     | chr11:108205597-108205750 | CCACTATCACATCGTCATTTGT   |
| ATM.54.2.ATM.2_R     | chr11:108205597-108205750 | ACCTCCTGCTAAGCGAAATT     |
| ERBB3.11.1.ERBB3.1_F | chr12:56486713-56486867   | AAGTTATAGGGGAGGAGCCA     |
| ERBB3.11.1.ERBB3.1_R | chr12:56486713-56486867   | GCCATTTCCCTCCATACCCTT    |
| ERBB3.21.1.ERBB3.1_F | chr12:56491599-56491756   | CTACCTTGAGGAACATGGTATG   |
| ERBB3.21.1.ERBB3.1_R | chr12:56491599-56491756   | TATCCCCATGCTTCACTCCA     |
| ERBB3.21.2.ERBB3.2_F | chr12:56491493-56491648   | CACCTGCTGAGAGGTACCTTC    |
| ERBB3.21.2.ERBB3.2_R | chr12:56491493-56491648   | CAAAATCTGCCACCTGAACC     |
| ERBB3.7.1.ERBB3.1_F  | chr12:56481795-56481947   | ACATAAATCTGATGAGCCTCCT   |
| ERBB3.7.1.ERBB3.1_R  | chr12:56481795-56481947   | TCCTTCCCTCAGACACTTA      |
| ERBB3.26.1.ERBB3.1_F | chr12:56493901-56494046   | TTAACTACTCAAAGGCCCCC     |
| ERBB3.26.1.ERBB3.1_R | chr12:56493901-56494046   | TGATCCTAAAACCCAGCCTC     |
| ERBB3.2.1.ERBB3.1_F  | chr12:56477544-56477701   | GCTTTGAACAGTGTGTCTTG     |
| ERBB3.2.1.ERBB3.1_R  | chr12:56477544-56477701   | GAGCAGGTTGAGGAAGGAG      |
| ERBB3.2.2.ERBB3.2_F  | chr12:56477531-56477671   | CACCTCTCCCTCTGCTTGA      |
| ERBB3.2.2.ERBB3.2_R  | chr12:56477531-56477671   | CTAACCTGCAGGAGGAGAG      |
| ERBB3.17.1.ERBB3.1_F | chr12:56489468-56489626   | AGCAAAACCCATCTGACAATG    |
| ERBB3.17.1.ERBB3.1_R | chr12:56489468-56489626   | ACTTCCAGGACATGCAAAAA     |
| ERBB3.17.2.ERBB3.2_F | chr12:56489375-56489518   | CCAGGTCAGCATCATACCTT     |
| ERBB3.17.2.ERBB3.2_R | chr12:56489375-56489518   | CCACGCCAGTAGAGAAAAGT     |
| ERBB3.22.1.ERBB3.1_F | chr12:56492238-56492372   | TGGGACTTGAAATCCTAAGA     |
| ERBB3.22.1.ERBB3.1_R | chr12:56492238-56492372   | GTGATGGTAGAGAGGGCATC     |
| ERBB3.1.1.ERBB3.1_F  | chr12:56474031-56474167   | CTCTTGCCCTCGATGTCTTAG    |
| ERBB3.1.1.ERBB3.1_R  | chr12:56474031-56474167   | TGCTCTCGCGCCACTTA        |
| ERBB3.18.1.ERBB3.1_F | chr12:56490275-56490422   | TCCTGAGTAACTCCTTCCCA     |
| ERBB3.18.1.ERBB3.1_R | chr12:56490275-56490422   | TTCCCCACCTCTCCAGAATT     |
| ERBB3.16.1.ERBB3.1_F | chr12:56488960-56489101   | ATGCCACGGTAAGTCTGAA      |
| ERBB3.16.1.ERBB3.1_R | chr12:56488960-56489101   | TTTCCAGAACTCCAACCCC      |
| ERBB3.13.1.ERBB3.1_F | chr12:56487556-56487719   | TTCTTTCCAGTGGCAGAG       |
| ERBB3.13.1.ERBB3.1_R | chr12:56487556-56487719   | AGTTCCATTGCAGGGCC        |
| ERBB3.13.2.ERBB3.2_F | chr12:56487653-56487783   | TTATAGCCGAGGAGGTGTCT     |
| ERBB3.13.2.ERBB3.2_R | chr12:56487653-56487783   | CTACCTCAATCCCACCAAGG     |
| ERBB3.13.2.ERBB3.3_F | chr12:56487482-56487632   | TGGAAGCAGTAACGAGGAAG     |
| ERBB3.13.2.ERBB3.3_R | chr12:56487482-56487632   | AGACACCTCCTCGGCTATAA     |
| ERBB3.23.1.ERBB3.1_F | chr12:56492531-56492693   | GCCAGTGACTAGTCCATGTC     |
| ERBB3.23.1.ERBB3.1_R | chr12:56492531-56492693   | TGGGCTCAGCAGGTAAC        |
| ERBB3.23.2.ERBB3.2_F | chr12:56492393-56492536   | GATGCCCTCTTACCATCAC      |
| ERBB3.23.2.ERBB3.2_R | chr12:56492393-56492536   | CCAAACTGTACACCTGTTG      |
| ERBB3.27.1.ERBB3.1_F | chr12:56494865-56495024   | GAGTCTGCAGTTTCTGGGAG     |
| ERBB3.27.1.ERBB3.1_R | chr12:56494865-56495024   | GAATGGTAGGCGCTATCTCC     |
| ERBB3.27.2.ERBB3.2_F | chr12:56494768-56494927   | AGGCAGTGAACAACCCAATA     |
| ERBB3.27.2.ERBB3.2_R | chr12:56494768-56494927   | TTACATGCCCTCTGATGAC      |
| ERBB3.27.2.ERBB3.3_F | chr12:56495045-56495178   | GGAGATAGCGCTACCAATTC     |
| ERBB3.27.2.ERBB3.3_R | chr12:56495045-56495178   | CGGGAAAGAATTCAGGAA       |
| ERBB3.27.3.ERBB3.4_F | chr12:56494950-56495108   | CATCAGAGGGGCATGTAACA     |
| ERBB3.27.3.ERBB3.4_R | chr12:56494950-56495108   | GGCATGACATAACCGTTGAC     |
| ERBB3.25.1.ERBB3.1_F | chr12:56493642-56493804   | AGAGAGTGGGCCTGGAAT       |
| ERBB3.25.1.ERBB3.1_R | chr12:56493642-56493804   | TGTCTTACCCACGTGG         |
| ERBB3.25.2.ERBB3.2_F | chr12:56493740-56493880   | CCTAGACTTGAAGCAGAGG      |
| ERBB3.25.2.ERBB3.2_R | chr12:56493740-56493880   | GGGGCCCTTGTAGTAGTTAA     |
| ERBB3.25.2.ERBB3.3_F | chr12:56493554-56493691   | GTAGGGAGTAGGAGGTGCTA     |
| ERBB3.25.2.ERBB3.3_R | chr12:56493554-56493691   | TAGTTCTGGCTCCAGTCTTA     |
| ERBB3.6.1.ERBB3.1_F  | chr12:56481576-56481716   | CCATGCTTTCTCTCCTTCCA     |
| ERBB3.6.1.ERBB3.1_R  | chr12:56481576-56481716   | TCCCAATTTCAGAACCCAGG     |
| ERBB3.28.1.ERBB3.1_F | chr12:56495351-56495514   | AGGCACCTTTCTTCAGTG       |
| ERBB3.28.1.ERBB3.1_R | chr12:56495351-56495514   | AACTCTGTGTGCTGCC         |
| ERBB3.28.2.ERBB3.2_F | chr12:56495199-56495355   | TTCTCGAATTCTTTCCCCG      |
| ERBB3.28.2.ERBB3.2_R | chr12:56495199-56495355   | CAGTACCCAGGACAGAACTG     |
| ERBB3.28.2.ERBB3.3_F | chr12:56495555-56495715   | ACTCCACCTGTACCCATC       |
| ERBB3.28.2.ERBB3.3_R | chr12:56495555-56495715   | GGCATAATGGACATGGGGG      |
| ERBB3.28.3.ERBB3.4_F | chr12:56495702-56495858   | AGATGAGAGCTTTTCAGGGG     |

|                      |                         |                       |
|----------------------|-------------------------|-----------------------|
| ERBB3.28.3.ERBB3.4_R | chr12:56495702-56495858 | TGCCATTAAATGCTCCCTGA  |
| ERBB3.28.3.ERBB3.5_F | chr12:56495499-56495657 | GTACATGGATGTGGGGTCAG  |
| ERBB3.28.3.ERBB3.5_R | chr12:56495499-56495657 | ATACCCCTTGCTCAGATGCTG |
| ERBB3.3.1.ERBB3.1_F  | chr12:56478789-56478949 | TCTGTACAGTGGATTCCGAG  |
| ERBB3.3.1.ERBB3.1_R  | chr12:56478789-56478949 | ACCGGTGAGCTGAGTCAA    |
| ERBB3.3.2.ERBB3.2_F  | chr12:56478937-56479096 | AACTCCAGCCACGCTCT     |
| ERBB3.3.2.ERBB3.2_R  | chr12:56478937-56479096 | CTTAGGGAGCAATGGACCT   |
| ERBB3.3.2.ERBB3.3_F  | chr12:56478725-56478874 | CCTGAAGGAGGAGAGGAGAT  |
| ERBB3.3.2.ERBB3.3_R  | chr12:56478725-56478874 | ATGGCAAACCTCCCATCGTA  |
| ERBB3.9.1.ERBB3.1_F  | chr12:56482532-56482691 | TGAACCTCTTTACATTTGCAG |
| ERBB3.9.1.ERBB3.1_R  | chr12:56482532-56482691 | ATGAACTGTGAGGGGTGC    |
| ERBB3.9.2.ERBB3.2_F  | chr12:56482674-56482824 | TTAGAGATCCTGCCTTCCCT  |
| ERBB3.9.2.ERBB3.2_R  | chr12:56482674-56482824 | CAAAGATGTTCTGAGGGGA   |
| ERBB3.12.1.ERBB3.1_F | chr12:56487149-56487310 | CGGGGCTTTCATTTGTTGA   |
| ERBB3.12.1.ERBB3.1_R | chr12:56487149-56487310 | TCTGCGCGGCCGATTAT     |
| ERBB3.12.2.ERBB3.2_F | chr12:56487260-56487396 | CTGCTACCACCCTCTTTGA   |
| ERBB3.12.2.ERBB3.2_R | chr12:56487260-56487396 | CCACGCTTAGGGCAGAATAG  |
| ERBB3.12.2.ERBB3.3_F | chr12:56487034-56487163 | TTCCCTCTCAGTGGATCTGA  |
| ERBB3.12.2.ERBB3.3_R | chr12:56487034-56487163 | GAAGCCCAGAGATGTGACAT  |
| ERBB3.14.1.ERBB3.1_F | chr12:56487846-56487981 | GAGCATGAAGGTCAGGACTT  |
| ERBB3.14.1.ERBB3.1_R | chr12:56487846-56487981 | CTTGGAGATCCTGGTGTAC   |
| ERBB3.15.1.ERBB3.1_F | chr12:56488196-56488354 | TTCCACTCAGGGCTCTGATA  |
| ERBB3.15.1.ERBB3.1_R | chr12:56488196-56488354 | CCTGACCCCTCTCCTTATT   |
| ERBB3.15.2.ERBB3.2_F | chr12:56488140-56488296 | CTTTGCTGGGAGGTATGGAA  |
| ERBB3.15.2.ERBB3.2_R | chr12:56488140-56488296 | GGCCGACATTCATTCTGAAC  |
| ERBB3.20.1.ERBB3.1_F | chr12:56490846-56491009 | GCATATGCTGGCCATTGG    |
| ERBB3.20.1.ERBB3.1_R | chr12:56490846-56491009 | AGGCTTCTCTCACCTTGG    |
| ERBB3.20.2.ERBB3.2_F | chr12:56490873-56491020 | GACCATGCCACATTTGTAAG  |
| ERBB3.20.2.ERBB3.2_R | chr12:56490873-56491020 | ACAGAATTCTCCAGGCTTC   |
| ERBB3.20.2.ERBB3.3_F | chr12:56490786-56490930 | GTGCACATGCTGAGTGTATG  |
| ERBB3.20.2.ERBB3.3_R | chr12:56490786-56490930 | ACATGATCCAGCAGAGAACC  |
| ERBB3.8.1.ERBB3.1_F  | chr12:56482327-56482469 | GTCCCTCCTCTCTCCCTAG   |
| ERBB3.8.1.ERBB3.1_R  | chr12:56482327-56482469 | CTCAGAGGAAGGCTGTCTC   |
| ERBB3.4.1.ERBB3.1_F  | chr12:56480307-56480452 | AACCCCTGTCACTTCTTTCCC |
| ERBB3.4.1.ERBB3.1_R  | chr12:56480307-56480452 | ACTGGGGAGCAATCTTGATC  |
| ERBB3.24.1.ERBB3.1_F | chr12:56493397-56493533 | CCGGCCATGGAAATGTATTCT |
| ERBB3.24.1.ERBB3.1_R | chr12:56493397-56493533 | TAGCACCTCTACTCCCTAC   |
| ERBB3.19.1.ERBB3.1_F | chr12:56490503-56490638 | TGACCTAGGGAGAATGACCT  |
| ERBB3.19.1.ERBB3.1_R | chr12:56490503-56490638 | AGCGGCATACAGAATTTCTC  |
| ERBB3.10.1.ERBB3.1_F | chr12:56486490-56486634 | GTGCTCATTGCCATTGAGTT  |
| ERBB3.10.1.ERBB3.1_R | chr12:56486490-56486634 | GCCAGTGGTTACCTATTCT   |
| ERBB3.5.1.ERBB3.1_F  | chr12:56481331-56481466 | AGCCTTCTTAGCCCTGATG   |
| ERBB3.5.1.ERBB3.1_R  | chr12:56481331-56481466 | TGGGGAGGAAGGATATGAA   |
| RET.11.1.RET.1_F     | chr10:43609988-43610151 | GCTGTCTCTCTCTCTTCA    |
| RET.11.1.RET.1_R     | chr10:43609988-43610151 | TCCACGGAGACCTGGTT     |
| RET.11.2.RET.2_F     | chr10:43610151-43610311 | TCGCTGGACTCCATGGA     |
| RET.11.2.RET.2_R     | chr10:43610151-43610311 | CTATGGAAATGGGGCAGAA   |
| RET.11.2.RET.3_F     | chr10:43609864-43610017 | CCATGAGGCAGAGCATACG   |
| RET.11.2.RET.3_R     | chr10:43609864-43610017 | AAACTTGTGGTAGCAGTGGA  |
| RET.7.1.RET.1_F      | chr10:43606674-43606835 | GATCGGGAAAGTCTGTGTGG  |
| RET.7.1.RET.1_R      | chr10:43606674-43606835 | TGGCCACCACCATGTAGT    |
| RET.7.2.RET.2_F      | chr10:43606809-43606970 | TGAATGACACCAAGGCC     |
| RET.7.2.RET.2_R      | chr10:43606809-43606970 | TTTTCTCAAAGGGCAGGAGG  |
| RET.7.2.RET.3_F      | chr10:43606579-43606708 | CTGTTCCAGGACTTAGGCTG  |
| RET.7.2.RET.3_R      | chr10:43606579-43606708 | CCAGAGGAATGCAGCTTGTA  |
| RET.17.1.RET.1_F     | chr10:43619119-43619278 | GGTCCCTTCACTCTCTGCAG  |
| RET.17.1.RET.1_R     | chr10:43619119-43619278 | TTCCCAAGTGAGGCTGG     |
| RET.2.1.RET.1_F      | chr10:43595907-43596066 | CACCTCCCTACTTCCCACAG  |
| RET.2.1.RET.1_R      | chr10:43595907-43596066 | TTGTTCTCATGCAGCCGT    |
| RET.2.2.RET.2_F      | chr10:43596057-43596218 | CCAGCATCTCTACGGCA     |
| RET.2.2.RET.2_R      | chr10:43596057-43596218 | GTGATAAGGGCGGCTTGAG   |
| RET.1.5.RET.1_F      | chr10:43572688-43572850 | AGTCCCTCCAGCCGTG      |
| RET.1.5.RET.1_R      | chr10:43572688-43572850 | AACAGAAAGGCGCTTCTGAA  |
| RET.18.1.RET.1_F     | chr10:43620313-43620443 | TGCTTGATCATATTGCCT    |
| RET.18.1.RET.1_R     | chr10:43620313-43620443 | TTCAGCTTGTGGGAATTGGA  |
| RET.13.1.RET.1_F     | chr10:43613821-43613979 | GCTCTGTGCTGCATTTTCA   |
| RET.13.1.RET.1_R     | chr10:43613821-43613979 | GAGAACAGGGCTGTATGGAG  |

|                      |                           |                        |
|----------------------|---------------------------|------------------------|
| RET.16.1.RET.1_F     | chr10:43617356-43617488   | CCCCCTCCTTCCCTAGAGAGT  |
| RET.16.1.RET.1_R     | chr10:43617356-43617488   | TGTTTCTGTAACCTCCACCC   |
| RET.6.1.RET.1_F      | chr10:43604508-43604668   | CAACCCGGAACCTCTCCATC   |
| RET.6.1.RET.1_R      | chr10:43604508-43604668   | GGCTCACCTGGGCAAAAT     |
| RET.6.2.RET.2_F      | chr10:43604557-43604710   | GCTGGTCAATGACTCAGACT   |
| RET.6.2.RET.2_R      | chr10:43604557-43604710   | ATGTCCCTTGGCCTTTCAAT   |
| RET.6.2.RET.3_F      | chr10:43604438-43604576   | TGCTACACATGAGGAGCAG    |
| RET.6.2.RET.3_R      | chr10:43604438-43604576   | TTGAAGTGGAGCAAGAGGAC   |
| RET.3.1.RET.1_F      | chr10:43597790-43597950   | GACCTGACTTCTCTCTGCAG   |
| RET.3.1.RET.1_R      | chr10:43597790-43597950   | GGCCTTGTCTCTGGGAA      |
| RET.3.2.RET.2_F      | chr10:43597920-43598078   | TTCAACACCTCCTTTCCAGC   |
| RET.3.2.RET.2_R      | chr10:43597920-43598078   | CACAAGGTCCGGCACTCA     |
| RET.9.1.RET.1_F      | chr10:43608286-43608423   | ATGGGTGACAGCCTGCT      |
| RET.9.1.RET.1_R      | chr10:43608286-43608423   | CTGTTCCCATGCCCTGATTA   |
| RET.12.3.RET.1_F     | chr10:43612029-43612169   | CCCTTCCCTCATTTCCAACA   |
| RET.12.3.RET.1_R     | chr10:43612029-43612169   | GGCAGGTACCTTTCCAGCAT   |
| RET.12.4.RET.2_F     | chr10:43612121-43612272   | GGAAAAGTGGTCAAGGCAAC   |
| RET.12.4.RET.2_R     | chr10:43612121-43612272   | CTCTAGAACAGCATTGGGGG   |
| RET.14.1.RET.1_F     | chr10:43615016-43615179   | TGGAGTACGCCAAATACGG    |
| RET.14.1.RET.1_R     | chr10:43615016-43615179   | CACCTTCATCTCGGCCA      |
| RET.14.2.RET.2_F     | chr10:43615160-43615296   | ATCTCATTTGCCTGGCAGAT   |
| RET.14.2.RET.2_R     | chr10:43615160-43615296   | CATGGTGGGTAGAGTGTG     |
| RET.14.2.RET.3_F     | chr10:43614884-43615046   | CCCCTTACTCATTTGGGTGG   |
| RET.14.2.RET.3_R     | chr10:43614884-43615046   | TAGCCAGGCCCACTTT       |
| RET.20.1.RET.1_F     | chr10:43623574-43623732   | TTTTAGGCATGTCAGACCCG   |
| RET.20.1.RET.1_R     | chr10:43623574-43623732   | CCCTTGTGAGTCCATTACC    |
| RET.20.2.RET.2_F     | chr10:43623465-43623605   | CACAGAAACCACGAGTTTGG   |
| RET.20.2.RET.2_R     | chr10:43623465-43623605   | TGTTAGTGCCATCAGCTCTC   |
| RET.15.1.RET.1_F     | chr10:43615529-43615687   | TCGTGCTATTTTCTCTCACAG  |
| RET.15.1.RET.1_R     | chr10:43615529-43615687   | CATGGTGCACCTGGGAT      |
| RET.8.1.RET.1_F      | chr10:43607537-43607673   | CTGTGACCCCTGCTTGTCTG   |
| RET.8.1.RET.1_R      | chr10:43607537-43607673   | GGCGTTTCCAGGGCTTA      |
| RET.4.1.RET.1_F      | chr10:43600496-43600656   | GAGAAGTACGAGCTGGTGG    |
| RET.4.1.RET.1_R      | chr10:43600496-43600656   | ACTGGGTAGACCCACAGCA    |
| RET.4.2.RET.2_F      | chr10:43600399-43600558   | TCGTCTTGGTGC GCA       |
| RET.4.2.RET.2_R      | chr10:43600399-43600558   | AGTCGTCTCGTGTG TACA    |
| RET.10.1.RET.1_F     | chr10:43609019-43609167   | AGGGGGCAGCATTGTTG      |
| RET.10.1.RET.1_R     | chr10:43609019-43609167   | GATGTGCTGTTGAGACCTCT   |
| RET.10.2.RET.2_F     | chr10:43608947-43609081   | GGACACTGCCCTGGAAATAT   |
| RET.10.2.RET.2_R     | chr10:43608947-43609081   | GAAGCACTTCTCCTCCTCAG   |
| RET.19.1.RET.1_F     | chr10:43622033-43622192   | TGTCTTCCAGGACTACTTGG   |
| RET.19.1.RET.1_R     | chr10:43622033-43622192   | GACAGCGGTGCTAGAATCTA   |
| RET.19.2.RET.2_F     | chr10:43622067-43622225   | ACTCCATCTGACTCCCTGAT   |
| RET.19.2.RET.2_R     | chr10:43622067-43622225   | AAGCATCACAGAGAGGAAGG   |
| RET.19.2.RET.3_F     | chr10:43621962-43622097   | CCTGAGGATGGCTTGTGTGA   |
| RET.19.2.RET.3_R     | chr10:43621962-43622097   | TTATTACAGTCCACCAGCGG   |
| RET.5.1.RET.1_F      | chr10:43601891-43602053   | ATCAGGGGAGCTGGTGA      |
| RET.5.1.RET.1_R      | chr10:43601891-43602053   | GAGCACCTCATTTCCTGGG    |
| RET.5.2.RET.2_F      | chr10:43601729-43601892   | CATCTGGTCCACCTATGGG    |
| RET.5.2.RET.2_R      | chr10:43601729-43601892   | AGCGTGCTTGTGTACCG      |
| FGFR2.11.1.FGFR2.1_F | chr10:123263324-123263481 | ACTTATCTCTGGAAACTCCCA  |
| FGFR2.11.1.FGFR2.1_R | chr10:123263324-123263481 | CAGATGGAGCCAGGATTACA   |
| FGFR2.11.2.FGFR2.2_F | chr10:123263299-123263446 | GGACATGGCCAAGAGAAGTA   |
| FGFR2.11.2.FGFR2.2_R | chr10:123263299-123263446 | TTTGATCCAGGTTTCGGCT    |
| FGFR2.7.1.FGFR2.1_F  | chr10:123247512-123247671 | GCCATCGACTTACATTGGTG   |
| FGFR2.7.1.FGFR2.1_R  | chr10:123247512-123247671 | TTTCCTTTTTGTTCTGGCGG   |
| FGFR2.7.2.FGFR2.2_F  | chr10:123247466-123247602 | CTGGAACATTCTGAGCCTCA   |
| FGFR2.7.2.FGFR2.2_R  | chr10:123247466-123247602 | TCATCGAGATTTAGCAGCCA   |
| FGFR2.2.1.FGFR2.1_F  | chr10:123239377-123239535 | GCAGACACAGTCATTCATGT   |
| FGFR2.2.1.FGFR2.1_R  | chr10:123239377-123239535 | GTCTCTCTTCCCTTCTTTTCAG |
| FGFR2.2.2.FGFR2.2_F  | chr10:123239293-123239426 | ACAAGTGGAGACAACAAGCT   |
| FGFR2.2.2.FGFR2.2_R  | chr10:123239293-123239426 | TTTTTCTCCAGACCCCATGC   |
| FGFR2.17.1.FGFR2.1_F | chr10:123310834-123310993 | AATGCGATGCTCCTGCTT     |
| FGFR2.17.1.FGFR2.1_R | chr10:123310834-123310993 | GCTGTCCATCAGTATACATTCT |
| FGFR2.17.2.FGFR2.2_F | chr10:123310739-123310895 | GCGAGACTCCATCGCAAAAA   |
| FGFR2.17.2.FGFR2.2_R | chr10:123310739-123310895 | GGCCAACACTGTCAAGTTTC   |
| FGFR2.1.3.FGFR2.1_F  | chr10:123239033-123239185 | TCTGTAAGTGTGTGCTGACA   |

|                      |                           |                         |
|----------------------|---------------------------|-------------------------|
| FGFR2.1.3.FGFR2.1_R  | chr10:123239033-123239185 | TGAAAACCTTGTAACTCTTCCCA |
| FGFR2.18.1.FGFR2.1_F | chr10:123324016-123324161 | GAGCCGGGCAGTTACTTAC     |
| FGFR2.18.1.FGFR2.1_R | chr10:123324016-123324161 | TGCTATGGAGAAGTCTCAG     |
| FGFR2.13.1.FGFR2.1_F | chr10:123276828-123276985 | ACCCAGAGAGAAAGAACAGTA   |
| FGFR2.13.1.FGFR2.1_R | chr10:123276828-123276985 | CCTTTTCTTTTGCTTCCCTTG   |
| FGFR2.13.2.FGFR2.2_F | chr10:123276682-123276837 | GTGTGTGAATTTCCAAGGCA    |
| FGFR2.13.2.FGFR2.2_R | chr10:123276682-123276837 | TCTGCATGGTTGACAGTTCT    |
| FGFR2.16.1.FGFR2.1_F | chr10:123298052-123298212 | ACGTTTCATGCTTTCAAACGA   |
| FGFR2.16.1.FGFR2.1_R | chr10:123298052-123298212 | GGTACGAAACCAGCACTG      |
| FGFR2.16.2.FGFR2.2_F | chr10:123298075-123298233 | AAGCAAGAATGGGCTGGTAT    |
| FGFR2.16.2.FGFR2.2_R | chr10:123298075-123298233 | CCGCCTTTGCTTTGATCTTT    |
| FGFR2.6.1.FGFR2.1_F  | chr10:123246836-123246991 | TATTTTTCAGCTCAAGCCC     |
| FGFR2.6.1.FGFR2.1_R  | chr10:123246836-123246991 | TAGCCCTATTGAGCCTGCTA    |
| FGFR2.3.1.FGFR2.1_F  | chr10:123241664-123241821 | CCTGACCAACTTTTCCAGT     |
| FGFR2.3.1.FGFR2.1_R  | chr10:123241664-123241821 | ACAGCTGACCTTCAGAAGTT    |
| FGFR2.9.1.FGFR2.1_F  | chr10:123257996-123258154 | ATTTGGGCGAATGCAGTTTT    |
| FGFR2.9.1.FGFR2.1_R  | chr10:123257996-123258154 | CTGCCCATGAGTTAGAGGAA    |
| FGFR2.12.1.FGFR2.1_F | chr10:123274661-123274821 | CGCAGGGGATACGTTT        |
| FGFR2.12.1.FGFR2.1_R | chr10:123274661-123274821 | CAATCTAGCGCCTGGAAGAG    |
| FGFR2.12.2.FGFR2.2_F | chr10:123274733-123274878 | TTCTTCATTTCGGCACAGGAT   |
| FGFR2.12.2.FGFR2.2_R | chr10:123274733-123274878 | GTCAGTCTGGTGTGCTAACT    |
| FGFR2.12.2.FGFR2.3_F | chr10:123274556-123274712 | ACAGAAGTCGATGGCATCAA    |
| FGFR2.12.2.FGFR2.3_R | chr10:123274556-123274712 | ATCCTGTCCGAATGAAGAA     |
| FGFR2.15.1.FGFR2.1_F | chr10:123279517-123279677 | GAACCTTGAGGTAGGGCAG     |
| FGFR2.15.1.FGFR2.1_R | chr10:123279517-123279677 | CTCTCTCCACCAGAGCGAT     |
| FGFR2.15.2.FGFR2.2_F | chr10:123279623-123279774 | CAAACCTCTACGTCTCCTCCG   |
| FGFR2.15.2.FGFR2.2_R | chr10:123279623-123279774 | CTTGAGGCTTTTCTGGCATG    |
| FGFR2.15.2.FGFR2.3_F | chr10:123279418-123279577 | CCTCTCTCAACTCCAACAGG    |
| FGFR2.15.2.FGFR2.3_R | chr10:123279418-123279577 | AAGGTTTACAGTGATGCCCA    |
| FGFR2.14.1.FGFR2.1_F | chr10:123278205-123278364 | AGCATTGTTACCTTGCTGTT    |
| FGFR2.14.1.FGFR2.1_R | chr10:123278205-123278364 | TCCTGGTTGGCCGTATATAT    |
| FGFR2.14.2.FGFR2.2_F | chr10:123278117-123278266 | ATCCTATAAGCTGCCTGCAG    |
| FGFR2.14.2.FGFR2.2_R | chr10:123278117-123278266 | CGGGATGCTGGGGAATATAT    |
| FGFR2.20.1.FGFR2.1_F | chr10:123353233-123353388 | AAATGACTTACCTTCTGGCTC   |
| FGFR2.20.1.FGFR2.1_R | chr10:123353233-123353388 | CCGTAGAGGAAGTGTGCAG     |
| FGFR2.20.2.FGFR2.2_F | chr10:123353181-123353325 | TTAACAACTTGCCCCAGAC     |
| FGFR2.20.2.FGFR2.2_R | chr10:123353181-123353325 | TTGGTACCCTAACCATGGTC    |
| FGFR2.8.1.FGFR2.1_F  | chr10:123256066-123256225 | CTTTTGGGAAGCCAAGTACT    |
| FGFR2.8.1.FGFR2.1_R  | chr10:123256066-123256225 | CTCAACAGGGCCTCTCTAT     |
| FGFR2.8.2.FGFR2.2_F  | chr10:123256207-123256348 | TTCTCGGAGGTTGCCTTTAG    |
| FGFR2.8.2.FGFR2.2_R  | chr10:123256207-123256348 | CCAGCCGCTGTATGTTAAAC    |
| FGFR2.8.2.FGFR2.3_F  | chr10:123256037-123256186 | CCCAGCCAAGTAGAATGTGA    |
| FGFR2.8.2.FGFR2.3_R  | chr10:123256037-123256186 | CTAAAGGCAACCTCCGAGAA    |
| FGFR2.4.1.FGFR2.1_F  | chr10:123243190-123243347 | AAGACAACCAAGGACAAGGG    |
| FGFR2.4.1.FGFR2.1_R  | chr10:123243190-123243347 | CACGTACCCAGTGCATATGA    |
| FGFR2.10.1.FGFR2.1_F | chr10:123260309-123260466 | GATAAGACTCTCCACCAGC     |
| FGFR2.10.1.FGFR2.1_R | chr10:123260309-123260466 | GTGCTAATCCCCTATTTACACA  |
| FGFR2.19.1.FGFR2.1_F | chr10:123324962-123325123 | GCCAACTCACCTGTGACATT    |
| FGFR2.19.1.FGFR2.1_R | chr10:123324962-123325123 | CTGTTGAAAGATGCCGCC      |
| FGFR2.19.2.FGFR2.2_F | chr10:123325119-123325272 | CCCCATCCTTAGTCCAACCTG   |
| FGFR2.19.2.FGFR2.2_R | chr10:123325119-123325272 | TGACCTTTGTTGGACGTCT     |
| FGFR2.19.2.FGFR2.3_F | chr10:123324865-123325012 | ATGCCTGGCATCCAATTACA    |
| FGFR2.19.2.FGFR2.3_R | chr10:123324865-123325012 | CTAGAGACTCCGGCCTCTAT    |
| FGFR2.5.1.FGFR2.1_F  | chr10:123244907-123245055 | CAGGAAAGACAACAGCCCTT    |
| FGFR2.5.1.FGFR2.1_R  | chr10:123244907-123245055 | TAATGCCGTGCTTTCTCCTT    |
| APC.11.36.APC.1_F    | chr5:112157564-112157710  | CATTGCTCTCAAATAACAAAGCA |
| APC.11.36.APC.1_R    | chr5:112157564-112157710  | TCCACCAGTAATGTCTATGTCA  |
| APC.7.1.APC.1_F      | chr5:112128079-112128235  | GCTTTTAAGTGGTAGCCATAGT  |
| APC.7.1.APC.1_R      | chr5:112128079-112128235  | CCCAACAACAAGAAAGGCAA    |
| APC.2.1.APC.1_F      | chr5:112090616-112090772  | GCAGCTTCATATGATCAGTTGT  |
| APC.2.1.APC.1_R      | chr5:112090616-112090772  | ACCTCAAGTTTACAAGAGGGA   |
| APC.2.2.APC.2_F      | chr5:112090585-112090717  | TATAGGTCCAAGGGTAGCCA    |
| APC.2.2.APC.2_R      | chr5:112090585-112090717  | AGTACAGTCTTGATACCTTCA   |
| APC.1.1.APC.1_F      | chr5:112043465-112043614  | CCTTTGCCCGCTTCTGT       |
| APC.1.1.APC.1_R      | chr5:112043465-112043614  | AAGCCGAGGAAGCTTTGC      |
| APC.1.2.APC.2_F      | chr5:112043384-112043544  | GGTGAGGAAGGTGAAGCAC     |
| APC.1.2.APC.2_R      | chr5:112043384-112043544  | CAGTGGCCAGAAGTACGAG     |



APC.16.1.APC.1\_F  
APC.16.1.APC.1\_R  
APC.16.2.APC.2\_F  
APC.16.2.APC.2\_R  
APC.16.2.APC.3\_F  
APC.16.2.APC.3\_R  
APC.16.3.APC.4\_F  
APC.16.3.APC.4\_R  
APC.16.3.APC.5\_F  
APC.16.3.APC.5\_R  
APC.16.4.APC.6\_F  
APC.16.4.APC.6\_R  
APC.16.4.APC.7\_F  
APC.16.4.APC.7\_R  
APC.16.5.APC.8\_F  
APC.16.5.APC.8\_R  
APC.16.6.APC.9\_F  
APC.16.6.APC.9\_R  
APC.16.6.APC.10\_F  
APC.16.6.APC.10\_R  
APC.16.7.APC.11\_F  
APC.16.7.APC.11\_R  
APC.16.7.APC.12\_F  
APC.16.7.APC.12\_R  
APC.16.8.APC.13\_F  
APC.16.8.APC.13\_R  
APC.16.8.APC.14\_F  
APC.16.8.APC.14\_R  
APC.16.9.APC.15\_F  
APC.16.9.APC.15\_R  
APC.16.9.APC.16\_F  
APC.16.9.APC.16\_R  
APC.16.10.APC.17\_F  
APC.16.10.APC.17\_R  
APC.16.10.APC.18\_F  
APC.16.10.APC.18\_R  
APC.16.11.APC.19\_F  
APC.16.11.APC.19\_R  
APC.16.12.APC.20\_F  
APC.16.12.APC.20\_R  
APC.16.12.APC.21\_F  
APC.16.12.APC.21\_R  
APC.16.13.APC.22\_F  
APC.16.13.APC.22\_R  
APC.16.13.APC.23\_F  
APC.16.13.APC.23\_R  
APC.16.14.APC.24\_F  
APC.16.14.APC.24\_R  
APC.16.14.APC.25\_F  
APC.16.14.APC.25\_R  
APC.16.15.APC.26\_F  
APC.16.15.APC.26\_R  
APC.16.16.APC.27\_F  
APC.16.16.APC.27\_R  
APC.16.16.APC.28\_F  
APC.16.16.APC.28\_R  
APC.16.17.APC.29\_F  
APC.16.17.APC.29\_R  
APC.16.17.APC.30\_F  
APC.16.17.APC.30\_R  
APC.16.18.APC.31\_F  
APC.16.18.APC.31\_R  
APC.16.18.APC.32\_F  
APC.16.18.APC.32\_R  
APC.16.19.APC.33\_F  
APC.16.19.APC.33\_R  
APC.16.19.APC.34\_F

chr5:112173359-112173519  
chr5:112173359-112173519  
chr5:112173219-112173371  
chr5:112173219-112173371  
chr5:112173580-112173739  
chr5:112173580-112173739  
chr5:112173473-112173627  
chr5:112173473-112173627  
chr5:112173760-112173919  
chr5:112173760-112173919  
chr5:112173648-112173782  
chr5:112173648-112173782  
chr5:112174240-112174399  
chr5:112174240-112174399  
chr5:112174410-112174569  
chr5:112174410-112174569  
chr5:112174299-112174437  
chr5:112174299-112174437  
chr5:112174640-112174799  
chr5:112174640-112174799  
chr5:112174538-112174666  
chr5:112174538-112174666  
chr5:112174819-112174979  
chr5:112174819-112174979  
chr5:112174687-112174839  
chr5:112174687-112174839  
chr5:112174999-112175159  
chr5:112174999-112175159  
chr5:112174862-112174999  
chr5:112174862-112174999  
chr5:112175260-112175420  
chr5:112175260-112175420  
chr5:112175149-112175277  
chr5:112175149-112175277  
chr5:112175421-112175580  
chr5:112175421-112175580  
chr5:112175631-112175791  
chr5:112175631-112175791  
chr5:112175520-112175677  
chr5:112175520-112175677  
chr5:112175882-112176041  
chr5:112175882-112176041  
chr5:112175749-112175897  
chr5:112175749-112175897  
chr5:112176052-112176211  
chr5:112176052-112176211  
chr5:112175918-112176073  
chr5:112175918-112176073  
chr5:112176209-112176371  
chr5:112176209-112176371  
chr5:112176380-112176541  
chr5:112176380-112176541  
chr5:112176322-112176481  
chr5:112176322-112176481  
chr5:112176922-112177081  
chr5:112176922-112177081  
chr5:112177111-112177271  
chr5:112177111-112177271  
chr5:112176809-112176961  
chr5:112176809-112176961  
chr5:112176982-112177122  
chr5:112176982-112177122  
chr5:112177440-112177601  
chr5:112177440-112177601  
chr5:112177622-112177781  
chr5:112177622-112177781  
chr5:112177291-112177444

ACTTTGTGGAATCTCTCAGCA  
AAGCTTGAGCCAGGAGAC  
ACTGCATACACATTGTGACC  
GTCCCATAAATGCTTCCTGGT  
CAAAAAGCCCTAGAAGCAGA  
GAAAGGACAGTCATGTTGCC  
GAAGTGCTGCAGCTTTAAGG  
GATGAGATGCCTTGGGACTT  
GGCAACATGACTGTCTTTC  
TGGTGGAGATCTGCAAACC  
AAGTCCAAGGCATCTCATC  
TGATGAAGAGGAGCTGGGTA  
GGTCAAATGAAACCCTCGAT  
GGACTTTCCTCCAGAGTT  
TGAGCAGTTGAACTCTGGAA  
AAACACATTCTGCTGTCCA  
TTATGGTCAATACCCAGCCG  
TTATGTGTTTGGGCTTGGCC  
CAGAAACAAATCGAGTGGGT  
GGCTGATCCACATGACGTT  
TCCTGTTTATACTGAGAGCACT  
TCTTGACACAAAGACTGGCT  
AAACGTCATGTGGATCAGCC  
GCAGAACTTGGATGGAGCT  
AGCCAGTCTTGTGTCAAGA  
TGATGAAGGAATATCTGTGGCA  
AGCTCCATCCAAGTTCTGC  
GCTTCCTGTGCTGCTGTGAT  
TGCCACAGATATTCTTCATCA  
GGCTGACCACTTCTACTCTG  
GAAGATCCTGTGAGCGAAGT  
ATGAGTGGGGTCTCCTGAA  
CTTTGTCATCAGCTGAAGATGA  
TGCTGGATTGGTTCTAGGG  
AAAGTCCACCTGAACACTATG  
ACTTCTGCTTGGTGGCATG  
CCACCTCCTCAAACAGCTC  
CTCAGGCTGGATGAACAAGA  
CTCCGTTCCAGAGTGAACCAT  
TGCTTAGGTCCACTCTCTCT  
ATGCCCTCCAGTTCAGGAA  
GCTTTACGTGATGACTTTGTTG  
CAGGTTCTTCCAGATGCTGA  
AGGCTGCTCTGATTCTGTTT  
CTGCCATGCCAACAAAGTC  
TGTCCTTCAACACAATACAC  
AAACAGAATCAGAGCAGCCT  
AATTTTGAAGCAGTCTGGGC  
CGGGGGATGATATGCCA  
AGCCTCATCTGACTTCTGTC  
TTCTTACAGAAAGGCAGAAAT  
GACGCAGATGCTTGCTG  
GCTGGAGAAGGAGTTAGAGG  
CTTTTCCCTTGGGCATAGC  
GATGTTGACCTTCCAGGGA  
GATGACTGGGGAAAAGTGGGA  
CCCCAGTCATCAAAGACAT  
CTTGGTTCTCCCTGTGAGT  
AGAGTCAGAGGAAGTTTTGCT  
TGGCTGGTAACTTTAGCCTC  
GAGGCTAAAGTTACCAGCCA  
ACTTTTCATCAGTTGCTGCC  
GCTCCGCAATGCCAAAAA  
GGAATTTGCACCTTCTTGAA  
TTCAGGAAGTGCAAATTC  
TGGTTTTAGAAATTCGTGGG  
GACTCACAGGGAGAACCAAG

|                    |                          |                           |
|--------------------|--------------------------|---------------------------|
| APC.16.19.APC.34_R | chr5:112177291-112177444 | CCCTTGAGTCTTGAAGGCTT      |
| APC.16.20.APC.35_F | chr5:112177582-112177711 | TGGTCTATCCCCTGATTTCAGA    |
| APC.16.20.APC.35_R | chr5:112177582-112177711 | GGTGATCCCAGAGAGATTCC      |
| APC.16.20.APC.36_F | chr5:112177269-112177398 | TATCAAAGAGACTGAGCCCC      |
| APC.16.20.APC.36_R | chr5:112177269-112177398 | TACATTCCTGCAACAGGTCA      |
| APC.16.20.APC.37_F | chr5:112177801-112177961 | GGCCCACGAATTCTAAAACC      |
| APC.16.20.APC.37_R | chr5:112177801-112177961 | ATTGTCTCCTGCCTCGAGAGA     |
| APC.16.21.APC.38_F | chr5:112177653-112177800 | TTTACATCAAGCTGCTGCTG      |
| APC.16.21.APC.38_R | chr5:112177653-112177800 | TCCAATGTACTTTTCTCCCCCT    |
| APC.16.21.APC.39_F | chr5:112177972-112178131 | ATGCCTTCAATCTCTCGAGG      |
| APC.16.21.APC.39_R | chr5:112177972-112178131 | TGGCAACAGGGCTTAATTC       |
| APC.16.22.APC.40_F | chr5:112177959-112178110 | CCTTCAAGCAAACATGCCTT      |
| APC.16.22.APC.40_R | chr5:112177959-112178110 | GATTTACAGATGGCTTGCC       |
| APC.16.22.APC.41_F | chr5:112178161-112178322 | TGTTGCCAGGCAGACATC        |
| APC.16.22.APC.41_R | chr5:112178161-112178322 | GGGATGATGTCCTTGGAAGT      |
| APC.16.23.APC.42_F | chr5:112178089-112178226 | AGCCCTAGTGAAGGTCAAAC      |
| APC.16.23.APC.42_R | chr5:112178089-112178226 | TACTTAATGGTTGCTGGGCA      |
| APC.16.23.APC.43_F | chr5:112178613-112178772 | ACCTGTATTAGTACGCCAGT      |
| APC.16.23.APC.43_R | chr5:112178613-112178772 | CCTGAACAGACGAATGTGTG      |
| APC.16.24.APC.44_F | chr5:112178793-112178952 | CACACATTCGTCTGTTCAGG      |
| APC.16.24.APC.44_R | chr5:112178793-112178952 | CTCGAGGAAGGGATGATGAA      |
| APC.16.24.APC.45_F | chr5:112178457-112178612 | CAGGTTTATCCAAGAATGCCA     |
| APC.16.24.APC.45_R | chr5:112178457-112178612 | GGAGCTTCTTTGATGAAAGTTG    |
| APC.16.25.APC.46_F | chr5:112178715-112178855 | ATCTAGACCAGCTTCTCCCA      |
| APC.16.25.APC.46_R | chr5:112178715-112178855 | AATATCATGGCGCTTTGCTG      |
| APC.16.25.APC.47_F | chr5:112178303-112178458 | CCCTGGTAGAAATGGAATAAGT    |
| APC.16.25.APC.47_R | chr5:112178303-112178458 | CAGACTCACTTCTTGGAATACT    |
| APC.16.25.APC.48_F | chr5:112179243-112179402 | TTATCAAATGGCACCTGCTG      |
| APC.16.25.APC.48_R | chr5:112179243-112179402 | CACTGCCATTACCCACATTT      |
| APC.16.26.APC.49_F | chr5:112179423-112179582 | AAATGTGGGTAATGGCAGTG      |
| APC.16.26.APC.49_R | chr5:112179423-112179582 | TGTGTTTGCTTGAGCTGCTA      |
| APC.16.26.APC.50_F | chr5:112179122-112179251 | ACCAAGTATCCGCAAAAAGGA     |
| APC.16.26.APC.50_R | chr5:112179122-112179251 | TCTCACCCAAACATCCTCTG      |
| APC.16.27.APC.51_F | chr5:112179583-112179742 | GAACGTACCCCATTCAGTTC      |
| APC.16.27.APC.51_R | chr5:112179583-112179742 | TCGTGTCTGTCAGTTTTGGA      |
| APC.16.27.APC.52_F | chr5:112179324-112179463 | TGGAAGATCTCCCACAGGTA      |
| APC.16.27.APC.52_R | chr5:112179324-112179463 | GGGGCATCCACCTGAATAAA      |
| APC.16.28.APC.53_F | chr5:112178952-112179111 | AAACGTGAGCACAGCAAAC       |
| APC.16.28.APC.53_R | chr5:112178952-112179111 | TTCTCCATGTTCTTTTGCG       |
| APC.16.28.APC.54_F | chr5:112176537-112176690 | CGTGTGAAAAGATAATGGACC     |
| APC.16.28.APC.54_R | chr5:112176537-112176690 | TCTGAGAAAACCTCTCAGCA      |
| APC.16.28.APC.55_F | chr5:112173920-112174069 | CAGGAACTTCTTCAAAGCGA      |
| APC.16.28.APC.55_R | chr5:112173920-112174069 | TTTGAATGTGTATGGGCAGC      |
| APC.16.29.APC.56_F | chr5:112179037-112179181 | TGCTTCATCAGAATCCAGTGA     |
| APC.16.29.APC.56_R | chr5:112179037-112179181 | CCATTTGTAGCACCTGAGGA      |
| APC.16.30.APC.57_F | chr5:112174069-112174219 | GAAATGCACCTAGAAGAAGCTC    |
| APC.16.30.APC.57_R | chr5:112174069-112174219 | ATCGAGGGTTTCATTTGACC      |
| APC.16.31.APC.58_F | chr5:112174148-112174278 | GACATGTTCTATGCCTTATGCC    |
| APC.16.31.APC.58_R | chr5:112174148-112174278 | CGGCTGGGTATTGACCATAA      |
| APC.16.33.APC.59_F | chr5:112176662-112176815 | ACTGAATATAGGACACGTGTAAGA  |
| APC.16.33.APC.59_R | chr5:112176662-112176815 | AGGCGTGAATGATGAGGTG       |
| APC.16.36.APC.60_F | chr5:112179681-112179823 | TAGGAAAAGCAGCGCAGATA      |
| APC.16.36.APC.60_R | chr5:112179681-112179823 | TCTTAGTTTCAATCTTCTCTCTT   |
| APC.13.1.APC.1_F   | chr5:112163592-112163742 | GCTTGGCTTCAAGTTGTCTT      |
| APC.13.1.APC.1_R   | chr5:112163592-112163742 | GAGACCCCTGCCTCAAAGAAA     |
| APC.6.37.APC.1_F   | chr5:112116384-112116618 | TCATGCACCATGACTGACGT      |
| APC.6.37.APC.1_R   | chr5:112116384-112116618 | AGCTCTTCGCTGTTTTATCACT    |
| APC.3.37.APC.1_F   | chr5:112101922-112102180 | GGTGGCTGCTTTGAGAGTGA      |
| APC.3.37.APC.1_R   | chr5:112101922-112102180 | ACCCAAATCGAGAGAAGCTGT     |
| APC.9.33.APC.1_F   | chr5:112151141-112151293 | GGAGTACCTTAACATGATGTTATCT |
| APC.9.33.APC.1_R   | chr5:112151141-112151293 | ACCAGGGTTTGTAACTCTCTGT    |
| APC.12.28.APC.1_F  | chr5:112162794-112162926 | TGCTTTTTTCTCTTGCCCT       |
| APC.12.28.APC.1_R  | chr5:112162794-112162926 | ACCTTGTGGCTACATCTCC       |
| APC.12.29.APC.2_F  | chr5:112162917-112163064 | GCTGGAATGGCTTTGACAAA      |
| APC.12.29.APC.2_R  | chr5:112162917-112163064 | CGAATGTGAAGCACAGGTTT      |
| APC.15.34.APC.1_F  | chr5:112170646-112170797 | GATGACCCATATTTCTGTTCTTACT |
| APC.15.34.APC.1_R  | chr5:112170646-112170797 | ATCCACCTCCACTTCAAT        |

|                      |                          |                            |
|----------------------|--------------------------|----------------------------|
| APC.15.35.APC.2_F    | chr5:112170774-112170906 | TTGGCACTCTTACTTACCGG       |
| APC.15.35.APC.2_R    | chr5:112170774-112170906 | GCTTACAATTAGGTCTTTTGGAGAG  |
| APC.14.37.APC.1_F    | chr5:112164563-112164722 | TGATTAATTTGCAGGTTATTGCCGA  |
| APC.14.37.APC.1_R    | chr5:112164563-112164722 | TGGCTAAAAGAAGGCAGCAA       |
| APC.14.38.APC.2_F    | chr5:112164419-112164568 | GCCTCCCAAAGTGATAGGAT       |
| APC.14.38.APC.2_R    | chr5:112164419-112164568 | TCGCCAAGACAAATTCCTCA       |
| APC.8.33.APC.1_F     | chr5:112136976-112137123 | ACTGATGTTAACTCCATCTTAAACAG |
| APC.8.33.APC.1_R     | chr5:112136976-112137123 | CCATCTTGCTTCATACTTTTCTGA   |
| APC.4.1.APC.1_F      | chr5:112102956-112103109 | ATGTCCCTCCGTTCTTATGG       |
| APC.4.1.APC.1_R      | chr5:112102956-112103109 | TGGAGTACACAAGGCAATGT       |
| APC.4.37.APC.2_F     | chr5:112102730-112102986 | TACCCTGACCCAAGTGGACT       |
| APC.4.37.APC.2_R     | chr5:112102730-112102986 | GGAACAGGACTGCACTCTCC       |
| APC.10.1.APC.1_F     | chr5:112154742-112154902 | GCGAACTTTGCTAGCTATGT       |
| APC.10.1.APC.1_R     | chr5:112154742-112154902 | TGTCATCAGGCTGTGAGTG        |
| APC.10.2.APC.2_F     | chr5:112154903-112155054 | CAGCACTCCACAACATCATT       |
| APC.10.2.APC.2_R     | chr5:112154903-112155054 | ACATGCACTACGATGTACACT      |
| APC.10.2.APC.3_F     | chr5:112154663-112154796 | CTAAACTCATTGGCCACAG        |
| APC.10.2.APC.3_R     | chr5:112154663-112154796 | TGCCATGTAAAAGCTGGATG       |
| APC.5.32.APC.1_F     | chr5:112111281-112111436 | ATTGCTCTTCTGCAGTCTTT       |
| APC.5.32.APC.1_R     | chr5:112111281-112111436 | AAGTTGTACTGCCAAGTTACTT     |
| ERBB2.11.1.ERBB2.1_F | chr17:37871458-37871617  | GAGTGAAGGCATTCATGGTG       |
| ERBB2.11.1.ERBB2.1_R | chr17:37871458-37871617  | AACAGGATGCAGAGACAGAG       |
| ERBB2.21.1.ERBB2.1_F | chr17:37880989-37881149  | TGTCGCCAGGAAGCATAACG       |
| ERBB2.21.1.ERBB2.1_R | chr17:37880989-37881149  | CATACCTTGGCAATCTGCAT       |
| ERBB2.21.2.ERBB2.2_F | chr17:37881111-37881268  | TAGACCATGTCCGGGAAAAC       |
| ERBB2.21.2.ERBB2.2_R | chr17:37881111-37881268  | CACCCATGTAGACCTTCTGG       |
| ERBB2.21.2.ERBB2.3_F | chr17:37880915-37881059  | CTGTGGTTTGTGATGGTTGG       |
| ERBB2.21.2.ERBB2.3_R | chr17:37880915-37881059  | TAGGGCATAAGCTGTGTCAC       |
| ERBB2.7.1.ERBB2.1_F  | chr17:37866294-37866454  | GATGCTGATGAGGGTCTGG        |
| ERBB2.7.1.ERBB2.1_R  | chr17:37866294-37866454  | CACAAAGCAGAGGCACATAC       |
| ERBB2.26.1.ERBB2.1_F | chr17:37883075-37883237  | CCTTCTCCACAGAATGAGG        |
| ERBB2.26.1.ERBB2.1_R | chr17:37883075-37883237  | TGGTAGATGAGCTGCCG          |
| ERBB2.26.2.ERBB2.2_F | chr17:37883204-37883350  | CTTCTTCTGTCCAGACCCTG       |
| ERBB2.26.2.ERBB2.2_R | chr17:37883204-37883350  | AATGGGGTTTCCCTGAGAGG       |
| ERBB2.26.2.ERBB2.3_F | chr17:37883002-37883147  | GATGAGTCCAGTATGCCAGG       |
| ERBB2.26.2.ERBB2.3_R | chr17:37883002-37883147  | GATACTCCTCAGCATCCACC       |
| ERBB2.2.8.ERBB2.1_F  | chr17:37856491-37856657  | GAGCCCGAGTGAGCAC           |
| ERBB2.2.8.ERBB2.1_R  | chr17:37856491-37856657  | TAGGAGAGCTCGTCCGG          |
| ERBB2.17.1.ERBB2.1_F | chr17:37875950-37876102  | AATGGGGATAATGACCCAGC       |
| ERBB2.17.1.ERBB2.1_R | chr17:37875950-37876102  | GGCAATGAAGGGTACATCCT       |
| ERBB2.22.1.ERBB2.1_F | chr17:37881310-37881457  | TCCCATCCAGGGGATGAG         |
| ERBB2.22.1.ERBB2.1_R | chr17:37881310-37881457  | TCCTTGGTCCCTTCCACCTAAC     |
| ERBB2.22.2.ERBB2.2_F | chr17:37881293-37881430  | AAGGTCTACATGGGTGCTTC       |
| ERBB2.22.2.ERBB2.2_R | chr17:37881293-37881430  | CCATCTGCATGGTACTCTGT       |
| ERBB2.1.1.ERBB2.1_F  | chr17:37855709-37855851  | GGGCAACAAGAGCAAAAGTT       |
| ERBB2.1.1.ERBB2.1_R  | chr17:37855709-37855851  | ATAGTCAAGGAGGGGGATGT       |
| ERBB2.18.4.ERBB2.1_F | chr17:37879552-37879692  | AAACTAGCCCTCAATCCCTG       |
| ERBB2.18.4.ERBB2.1_R | chr17:37879552-37879692  | TCCGTTTCCCTGCAGCAG         |
| ERBB2.18.5.ERBB2.2_F | chr17:37879682-37879837  | GCAGAAGATCCGGAAGTACA       |
| ERBB2.18.5.ERBB2.2_R | chr17:37879682-37879837  | TCTCTTTCAGGATCCGCATC       |
| ERBB2.23.1.ERBB2.1_F | chr17:37881563-37881717  | ACACACAGTTGGAGGACTTC       |
| ERBB2.23.1.ERBB2.1_R | chr17:37881563-37881717  | CGTAATTTCTCCCATCCCAG       |
| ERBB2.13.1.ERBB2.1_F | chr17:37871993-37872156  | GCCCACCTTTCTCCCATAG        |
| ERBB2.13.1.ERBB2.1_R | chr17:37871993-37872156  | GTTGGCAGTGTGGAGCA          |
| ERBB2.13.2.ERBB2.2_F | chr17:37872108-37872267  | ATAACACCCACCTCTGCCTC       |
| ERBB2.13.2.ERBB2.2_R | chr17:37872108-37872267  | GTCTGCACAAGTCCAAGAAC       |
| ERBB2.16.1.ERBB2.1_F | chr17:37873588-37873743  | AGGAGGCTGACCAGTGT          |
| ERBB2.16.1.ERBB2.1_R | chr17:37873588-37873743  | CCTTCTGCAGAAAAGACCG        |
| ERBB2.16.2.ERBB2.2_F | chr17:37873442-37873598  | GTGAAGAGCAAGGGTGTTTG       |
| ERBB2.16.2.ERBB2.2_R | chr17:37873442-37873598  | AGGGAGGGTCTTATAGTGG        |
| ERBB2.27.1.ERBB2.1_F | chr17:37883647-37883803  | GGCTGGCTCCGATGTATTT        |
| ERBB2.27.1.ERBB2.1_R | chr17:37883647-37883803  | TCTGCTTAGACTGGACTCCA       |
| ERBB2.27.2.ERBB2.2_F | chr17:37883495-37883646  | CTGTACCTTCCATGGAGTC        |
| ERBB2.27.2.ERBB2.2_R | chr17:37883495-37883646  | CCATTTCCAGGTCAACATC        |
| ERBB2.25.1.ERBB2.1_F | chr17:37882805-37882965  | TAGCATGCTGACCTCCCT         |
| ERBB2.25.1.ERBB2.1_R | chr17:37882805-37882965  | ATCTCTCTTCCCACCCCTC        |
| ERBB2.6.1.ERBB2.1_F  | chr17:37866066-37866222  | GTCTCTGGTTCTGTCTCAG        |

|                      |                         |                        |
|----------------------|-------------------------|------------------------|
| ERBB2.6.1.ERBB2.1_R  | chr17:37866066-37866222 | ACATCCCAAGCCTGTTATCC   |
| ERBB2.28.1.ERBB2.1_F | chr17:37883942-37884101 | CACCTTCTCTTGACCTTTCAG  |
| ERBB2.28.1.ERBB2.1_R | chr17:37883942-37884101 | CAAGTACTCGGGGTTCTCC    |
| ERBB2.28.2.ERBB2.2_F | chr17:37884120-37884283 | TGGAGAACCCCGAGTACTT    |
| ERBB2.28.2.ERBB2.2_R | chr17:37884120-37884283 | GGTTCACACTGGCACGT      |
| ERBB2.28.3.ERBB2.3_F | chr17:37884277-37884419 | CAGAGAACCAGAGTACCTG    |
| ERBB2.28.3.ERBB2.3_R | chr17:37884277-37884419 | GGTTCCTTAGGACAGGTCC    |
| ERBB2.28.3.ERBB2.4_F | chr17:37884094-37884233 | AAGACGTTTTTGCCTTTGGG   |
| ERBB2.28.3.ERBB2.4_R | chr17:37884094-37884233 | TAGGTGTCCCTTTGAAGGTG   |
| ERBB2.3.4.ERBB2.1_F  | chr17:37863235-37863380 | CTCTGACCCATCTGCTCTCT   |
| ERBB2.3.4.ERBB2.1_R  | chr17:37863235-37863380 | TCACCTGCAGGAAGGACA     |
| ERBB2.3.5.ERBB2.2_F  | chr17:37863364-37863502 | AACCTGGAACTCACCTACCT   |
| ERBB2.3.5.ERBB2.2_R  | chr17:37863364-37863502 | TCTTGGTTGAGAAACCACAA   |
| ERBB2.9.1.ERBB2.1_F  | chr17:37868210-37868370 | TTCTACGGACGTGGGATCC    |
| ERBB2.9.1.ERBB2.1_R  | chr17:37868210-37868370 | TGAGGAAGGATAGGACAGGG   |
| ERBB2.9.2.ERBB2.2_F  | chr17:37868078-37868237 | ATGCGTGGTAGGGCATTAA    |
| ERBB2.9.2.ERBB2.2_R  | chr17:37868078-37868237 | ATCCTCTGCTGTACCTCTT    |
| ERBB2.9.2.ERBB2.3_F  | chr17:37868401-37868562 | CCTTCCTCAGACCCCTTG     |
| ERBB2.9.2.ERBB2.3_R  | chr17:37868401-37868562 | TAGCACACTGAGGAGGTGG    |
| ERBB2.9.3.ERBB2.4_F  | chr17:37868258-37868413 | AAGAGGTGACAGCAGAGGAT   |
| ERBB2.9.3.ERBB2.4_R  | chr17:37868258-37868413 | AGGGGTAGAGAGTAGAAGGC   |
| ERBB2.12.1.ERBB2.1_F | chr17:37871641-37871789 | TGTCTCTGCATCCTGTTCTG   |
| ERBB2.12.1.ERBB2.1_R | chr17:37871641-37871789 | CCCTCTTCTCAGTGCTCAC    |
| ERBB2.14.4.ERBB2.1_F | chr17:37872530-37872676 | CTTCCCTAAAAGTCCCTC     |
| ERBB2.14.4.ERBB2.1_R | chr17:37872530-37872676 | CCCTCATACCCCTGCAGTA    |
| ERBB2.14.5.ERBB2.2_F | chr17:37872633-37872773 | CCACCCAGTGTGCAACTG     |
| ERBB2.14.5.ERBB2.2_R | chr17:37872633-37872773 | TGGCATTACATACTCCCTG    |
| ERBB2.20.1.ERBB2.1_F | chr17:37880164-37880323 | TATCCTCCTCTTCTTGCCCA   |
| ERBB2.20.1.ERBB2.1_R | chr17:37880164-37880323 | AATGAAGAGAGACCAGAGCC   |
| ERBB2.15.1.ERBB2.1_F | chr17:37872767-37872925 | ACCACGTGCCCTTCTCTCA    |
| ERBB2.15.1.ERBB2.1_R | chr17:37872767-37872925 | CTACTGCATCTCGCCATCC    |
| ERBB2.8.1.ERBB2.1_F  | chr17:37866575-37866734 | AAAACAGCACAGTGAAAGCC   |
| ERBB2.8.1.ERBB2.1_R  | chr17:37866575-37866734 | GTTTCTCCCTGGCACTCAC    |
| ERBB2.4.1.ERBB2.1_F  | chr17:37864613-37864773 | TACGTGCTCATCGTCTCAC    |
| ERBB2.4.1.ERBB2.1_R  | chr17:37864613-37864773 | CACCTGTGAGGCTTCGA      |
| ERBB2.4.2.ERBB2.2_F  | chr17:37864737-37864874 | GAACAATACCACCCCTGTCA   |
| ERBB2.4.2.ERBB2.2_R  | chr17:37864737-37864874 | CCAGAAGGGACACCATTCT    |
| ERBB2.4.2.ERBB2.3_F  | chr17:37864557-37864715 | GTTCTATTTTCAGCCCACT    |
| ERBB2.4.2.ERBB2.3_R  | chr17:37864557-37864715 | GACAGGGGTGGATTGTCTCA   |
| ERBB2.24.4.ERBB2.1_F | chr17:37881959-37882101 | TGACCCCTGTCTCTGCCCTTA  |
| ERBB2.24.4.ERBB2.1_R | chr17:37881959-37882101 | CTCAGCCACGCACATTTG     |
| ERBB2.24.5.ERBB2.2_F | chr17:37882088-37882224 | CCATCTGCACCATTGATGTC   |
| ERBB2.24.5.ERBB2.2_R | chr17:37882088-37882224 | AAGAAGTTTTGAGGCTCCT    |
| ERBB2.19.6.ERBB2.1_F | chr17:37879739-37879903 | TGAAGTCCCTCCAGCCC      |
| ERBB2.19.6.ERBB2.1_R | chr17:37879739-37879903 | GCCCTGACCTTGTAGACT     |
| ERBB2.19.7.ERBB2.2_F | chr17:37879889-37880030 | AAGGTGAAGGTGCTTGGATC   |
| ERBB2.19.7.ERBB2.2_R | chr17:37879889-37880030 | CTCCCTTCTCCGCTGTAAC    |
| ERBB2.10.1.ERBB2.1_F | chr17:37868584-37868739 | CACCTCCTCAGTGTGCTATG   |
| ERBB2.10.1.ERBB2.1_R | chr17:37868584-37868739 | GGATCCTCAGGACTCTGTCT   |
| ERBB2.10.2.ERBB2.2_F | chr17:37868464-37868623 | AGCCCTACAAGTGTCCCTAT   |
| ERBB2.10.2.ERBB2.2_R | chr17:37868464-37868623 | ACTCCTGGATATTGGCACTG   |
| ERBB2.5.1.ERBB2.1_F  | chr17:37865565-37865722 | TCCTCTGATCATTTGCTCACC  |
| ERBB2.5.1.ERBB2.1_R  | chr17:37865565-37865722 | CTGAGAGAAGAGGCAGCAG    |
| PALB2.6.1.PALB2.1_F  | chr16:23635293-23635429 | CCAGCTGACAGAGACAAAGA   |
| PALB2.6.1.PALB2.1_R  | chr16:23635293-23635429 | CCAAGCATAATTTTGGCTGC   |
| PALB2.11.1.ERBB2.1_F | chr16:23649161-23649290 | AGCAGGCATAAGTGAATGGT   |
| PALB2.11.1.ERBB2.1_R | chr16:23649161-23649290 | GAAAACGTATTTCTGGGGCT   |
| PALB2.3.1.ERBB2.1_F  | chr16:23625309-23625439 | TAACACACAAGTGGTCCCA    |
| PALB2.3.1.ERBB2.1_R  | chr16:23625309-23625439 | CTGGTTTGTGGAGAATGTGA   |
| PALB2.7.1.ERBB2.1_F  | chr16:23637557-23637716 | AGCTCGAGATTTCCCACTTAC  |
| PALB2.7.1.ERBB2.1_R  | chr16:23637557-23637716 | CTGTTGCCATTGTGTCAGAA   |
| PALB2.7.2.ERBB2.2_F  | chr16:23637580-23637739 | TGCGAAGTGCCAGGTATAAA   |
| PALB2.7.2.ERBB2.2_R  | chr16:23637580-23637739 | ACTCGAGTGCCACTTTAACA   |
| PALB2.9.1.ERBB2.1_F  | chr16:23640961-23641121 | TCACAGAGGAAATGGATTGTAC |
| PALB2.9.1.ERBB2.1_R  | chr16:23640961-23641121 | AGGCAGCCCAGCAAAC       |
| PALB2.9.2.ERBB2.2_F  | chr16:23641122-23641281 | ACTTGCAGGGTGGTATGTG    |
| PALB2.9.2.ERBB2.2_R  | chr16:23641122-23641281 | CACCTGCTTTCCCATCTTA    |

|                        |                         |                          |
|------------------------|-------------------------|--------------------------|
| PALB2.9.3.PALB2.3_F    | chr16:23641322-23641481 | AACACATGTCTGTGGTAGGC     |
| PALB2.9.3.PALB2.3_R    | chr16:23641322-23641481 | ACTGAGTCCTAAACGCATGG     |
| PALB2.9.4.PALB2.4_F    | chr16:23641237-23641376 | CGTCCAGCAACTTCTGTAGA     |
| PALB2.9.4.PALB2.4_R    | chr16:23641237-23641376 | TACAAAGACGGGCCTTTCTT     |
| PALB2.9.4.PALB2.5_F    | chr16:23641541-23641701 | GCTTCCTCTTTAAGATGTCTC    |
| PALB2.9.4.PALB2.5_R    | chr16:23641541-23641701 | ATGCTTTCACGGCTCCA        |
| PALB2.9.5.PALB2.6_F    | chr16:23641696-23641826 | AAACTCAGCATTCCATCCCT     |
| PALB2.9.5.PALB2.6_R    | chr16:23641696-23641826 | CAGATTGCTGTTTTGTGGGT     |
| PALB2.9.5.PALB2.7_F    | chr16:23641429-23641567 | GAGTTTGGCCTTTTGGGATG     |
| PALB2.9.5.PALB2.7_R    | chr16:23641429-23641567 | TGCTCAGAAAAACCAGTGGA     |
| PALB2.12.1.PALB2.1_F   | chr16:23649309-23649466 | ACAGCCCCAGAAATACGTTT     |
| PALB2.12.1.PALB2.1_R   | chr16:23649309-23649466 | ACTTGCCCACTATTTGTTGGT    |
| PALB2.2.1.PALB2.1_F    | chr16:23619214-23619365 | GCCCTGGAGGAAGACAGTA      |
| PALB2.2.1.PALB2.1_R    | chr16:23619214-23619365 | TCCTGACATACTCTTGACAGTC   |
| PALB2.2.2.PALB2.2_F    | chr16:23619151-23619284 | GCACAGTGCCTTTCAGAATG     |
| PALB2.2.2.PALB2.2_R    | chr16:23619151-23619284 | CTGTGCCAAGAGAGTGAGT      |
| PALB2.8.1.PALB2.1_F    | chr16:23640509-23640647 | AAGACACGAGACACTGGAAG     |
| PALB2.8.1.PALB2.1_R    | chr16:23640509-23640647 | TGATGAGTGGGTAATGCAGG     |
| PALB2.1.8.PALB2.1_F    | chr16:23614755-23614910 | AGAGGCCCAATATATCCAGAA    |
| PALB2.1.8.PALB2.1_R    | chr16:23614755-23614910 | TGCCATTTGGGACTTACTTC     |
| PALB2.1.9.PALB2.2_F    | chr16:23614907-23615055 | GAGGAGGGCAGTACACTGA      |
| PALB2.1.9.PALB2.2_R    | chr16:23614907-23615055 | TGGGAACATGGTTTTGACCT     |
| PALB2.4.1.PALB2.1_F    | chr16:23632681-23632838 | AGGACCTAGAGGGAAAGCTT     |
| PALB2.4.1.PALB2.1_R    | chr16:23632681-23632838 | GGCTACCTAGAGACTGCTTT     |
| PALB2.13.1.PALB2.1_F   | chr16:23652337-23652486 | GGGGTGGTCAGATGATACTG     |
| PALB2.13.1.PALB2.1_R   | chr16:23652337-23652486 | CTGCTCTTTTCGTCTGTGTCG    |
| PALB2.10.1.PALB2.1_F   | chr16:23646283-23646442 | GCTAGAAGTTGGCAAAAGTGG    |
| PALB2.10.1.PALB2.1_R   | chr16:23646283-23646442 | GCACAGGACAACCAAGTTC      |
| PALB2.10.2.PALB2.2_F   | chr16:23646443-23646602 | GAGAAGTTTCTGAGAGTTCTT    |
| PALB2.10.2.PALB2.2_R   | chr16:23646443-23646602 | TGTCCAATTGCCAGAGGA       |
| PALB2.10.2.PALB2.3_F   | chr16:23646128-23646285 | AAGGAAGTGCCAGGCAAATA     |
| PALB2.10.2.PALB2.3_R   | chr16:23646128-23646285 | CCCCAGCATCAGATCATTGT     |
| PALB2.10.3.PALB2.4_F   | chr16:23646613-23646772 | GGCTACTTTCCCTCTGGCA      |
| PALB2.10.3.PALB2.4_R   | chr16:23646613-23646772 | AGTGACACTCTTGATGGCAG     |
| PALB2.10.4.PALB2.5_F   | chr16:23646464-23646612 | AACTTGGTTGTCTGTGCAT      |
| PALB2.10.4.PALB2.5_R   | chr16:23646464-23646612 | CAACACGAAGCATGTCCAAT     |
| PALB2.10.4.PALB2.6_F   | chr16:23647003-23647165 | TGCCTTGTGCCTCCAA         |
| PALB2.10.4.PALB2.6_R   | chr16:23647003-23647165 | CCAACCAGAAAAAGGTGTTGA    |
| PALB2.10.5.PALB2.7_F   | chr16:23647196-23647358 | CTGGTTGGGCAGTTGGT        |
| PALB2.10.5.PALB2.7_R   | chr16:23647196-23647358 | CTTTGGCCTGATTCACTCA      |
| PALB2.10.6.PALB2.8_F   | chr16:23647153-23647291 | GCCTTGGTGAATTAGGTCT      |
| PALB2.10.6.PALB2.8_R   | chr16:23647153-23647291 | AATCCTGCTAGATCACCAGT     |
| PALB2.10.6.PALB2.9_F   | chr16:23647369-23647528 | CCCAGACAATCTGAGTGAATC    |
| PALB2.10.6.PALB2.9_R   | chr16:23647369-23647528 | TTAACCTTGGAGATGGCCC      |
| PALB2.10.7.PALB2.10_F  | chr16:23647337-23647477 | GCTACTGATTTCTTCTGTGCC    |
| PALB2.10.7.PALB2.10_R  | chr16:23647337-23647477 | ACCCAAGAACATTTTCCCCA     |
| PALB2.10.10.PALB2.11_F | chr16:23646758-23646912 | GTTTGACTTAGAATCTCACTTCC  |
| PALB2.10.10.PALB2.11_R | chr16:23646758-23646912 | GCCAACCTGCCACAAGT        |
| PALB2.10.11.PALB2.12_F | chr16:23646892-23647037 | GGTGAGTTCATTTAGAGAACATGA |
| PALB2.10.11.PALB2.12_R | chr16:23646892-23647037 | GCAGTGAACCTACTACTCAG     |
| PALB2.10.12.PALB2.13_F | chr16:23647498-23647645 | TGGGGAAAAATGTTCTGGGT     |
| PALB2.10.12.PALB2.13_R | chr16:23647498-23647645 | TTTTCTCCTCAGAACCTAAAAA   |
| PALB2.10.13.PALB2.14_F | chr16:23647612-23647768 | CAGTTTCTTCATCAAGATGGGT   |
| PALB2.10.13.PALB2.14_R | chr16:23647612-23647768 | GCCTGAATGAAATGTCACTGA    |
| PALB2.5.1.PALB2.1_F    | chr16:23634319-23634470 | TCTGCAAACGTCATGACTTC     |
| PALB2.5.1.PALB2.1_R    | chr16:23634319-23634470 | CTCCTCACATCACCCCATTT     |
| PALB2.5.2.PALB2.2_F    | chr16:23634171-23634322 | ACCTAGTGTGATGCGGTAC      |
| PALB2.5.2.PALB2.2_R    | chr16:23634171-23634322 | GGGACCTTTCTGATCAACA      |

**Table S3: Universal PCR primers**

|                         |                                                                     |
|-------------------------|---------------------------------------------------------------------|
| Illumina IndexF         | AATGATACGGCGACCACCGAGATCTACACTCTTTCCCTACACGACGCTCTTCCGATCTCTG       |
| Illumina IndexR*        | CAAGCAGAAGACGGCATACGAGATXXXXXXGTGACTGGAGTTCAGACGTGTGCTCTTCCGATCTGAC |
| Sequencing Primer read1 | ACTCTTTCCCTACACGACGCTCTTCCGATCTCTG                                  |
| Sequencing Primer read2 | ACTGGAGTTCAGACGTGTGCTCTTCCGATCTGAC                                  |

\* X represents the DNA barcode

**Table S4: Significant copy number gains and losses**

| <b>Gene</b> | <b>Sample</b> | <b>Log2(T/N)</b> | <b>P-value</b> |
|-------------|---------------|------------------|----------------|
| ABL2        | UCI8965412    | 1.62             | 0              |
| BRAF        | UCI1689380    | 1.05             | 3.77E-82       |
| ERBB2       | AA1204        | 1.37             | 6.81E-148      |
| ERBB2       | AA1222        | 1.98             | 0              |
| ERBB2       | AA1247        | 2.66             | 0              |
| ERBB2       | UCI1908503    | 1.78             | 0              |
| ERBB2       | UCI8965412    | 2.42             | 0              |
| FGFR1       | AA1090        | 1.41             | 1.55E-138      |
| FGFR1       | UCI2649875    | 1.54             | 4.06E-133      |
| FGFR1OP     | AA1277        | -1.41            | 2.42E-08       |
| FGFR2       | AA1277        | 2.20             | 0              |
| PIK3CA      | UCI3564897    | 1.54             | 1.55E-169      |

**Table S5: Read Alignment and Coverage Statistics**

| Patient ID | Sample ID <sup>1</sup> | Run ID             | #Reads    | #Aligned  | Mean Read             | Coverage                |
|------------|------------------------|--------------------|-----------|-----------|-----------------------|-------------------------|
|            |                        |                    |           |           | Coverage <sup>2</sup> | Uniformity <sup>3</sup> |
| AA1025     | AA1025B                | 120719_M00436_0005 | 2,238,436 | 2,161,009 | 1,049                 | 96%                     |
| AA1025     | AA1025T                | 120719_M00436_0005 | 2,749,834 | 2,707,115 | 1,384                 | 95%                     |
| AA1077     | AA1077B                | 121025_M00436_0010 | 3,767,118 | 3,374,294 | 1,625                 | 94%                     |
| AA1077     | AA1077T                | 121025_M00436_0010 | 3,014,584 | 2,942,237 | 1,529                 | 91%                     |
| AA1090     | AA1090B                | 120823_M00436_0009 | 2,049,694 | 2,003,189 | 1,064                 | 92%                     |
| AA1090     | AA1090T                | 120823_M00436_0009 | 2,291,814 | 2,232,270 | 1,170                 | 85%                     |
| AA943      | AA943B                 | 120831_M00436_0012 | 3,208,654 | 3,160,224 | 1,631                 | 96%                     |
| AA943      | AA943T                 | 120831_M00436_0012 | 3,875,458 | 3,764,254 | 1,869                 | 95%                     |
| AA1188     | AA1188B                | 120814_M00436_0008 | 3,621,022 | 3,554,531 | 1,874                 | 95%                     |
| AA1188     | AA1188T                | 120814_M00436_0008 | 3,106,796 | 3,005,426 | 1,553                 | 95%                     |
| AA1204     | AA1204B                | 120719_M00436_0005 | 4,048,560 | 4,003,089 | 2,105                 | 95%                     |
| AA1204     | AA1204T                | 120719_M00436_0005 | 3,070,104 | 3,034,944 | 1,568                 | 91%                     |
| AA1222     | AA1222B                | 121025_M00436_0010 | 3,555,052 | 3,171,760 | 1,536                 | 93%                     |
| AA1222     | AA1222T                | 121025_M00436_0010 | 3,056,424 | 2,989,223 | 1,569                 | 87%                     |
| AA1247     | AA1247B                | 120814_M00436_0008 | 2,980,418 | 2,937,581 | 1,570                 | 95%                     |
| AA1247     | AA1247T                | 120814_M00436_0008 | 3,436,018 | 3,389,175 | 1,821                 | 86%                     |
| AA1267     | AA1267B                | 120827_M00436_0011 | 2,437,798 | 2,392,933 | 1,249                 | 94%                     |
| AA1267     | AA1267T                | 120827_M00436_0011 | 2,803,204 | 2,770,720 | 1,477                 | 93%                     |
| AA1277     | AA1277B                | 120825_M00436_0010 | 2,265,368 | 2,206,906 | 1,026                 | 94%                     |
| AA1277     | AA1277T                | 120825_M00436_0010 | 2,896,468 | 2,851,861 | 1,412                 | 84%                     |
| AA1307     | AA1307B                | 120827_M00436_0011 | 3,828,404 | 3,798,149 | 2,040                 | 95%                     |
| AA1307     | AA1307T                | 120827_M00436_0011 | 2,671,612 | 2,626,127 | 1,371                 | 92%                     |
| AA957      | AA957B                 | 120831_M00436_0012 | 3,404,866 | 3,348,375 | 1,697                 | 96%                     |
| AA957      | AA957T                 | 120831_M00436_0012 | 1,487,058 | 1,455,284 | 731                   | 95%                     |
| AA926      | AA926B                 | 120712_M00436_0004 | 2,738,246 | 2,710,403 | 1,462                 | 95%                     |
| AA926      | AA926T                 | 120712_M00436_0004 | 2,484,200 | 2,434,466 | 1,314                 | 91%                     |
| AA930      | AA930B                 | 120727_M00436_0007 | 2,628,572 | 2,540,172 | 1,318                 | 95%                     |
| AA930      | AA930T                 | 120727_M00436_0007 | 3,730,366 | 3,659,703 | 1,950                 | 95%                     |
| AA1106     | AA1106B                | 120918_M00436_0001 | 3,586,450 | 3,546,087 | 1,897                 | 95%                     |
| AA1106     | AA1106T                | 120918_M00436_0001 | 3,834,160 | 3,788,715 | 2,039                 | 94%                     |
| AA948      | AA948B                 | 120723_M00436_0006 | 2,760,844 | 2,701,244 | 1,360                 | 96%                     |
| AA948      | AA948T                 | 120723_M00436_0006 | 3,116,402 | 3,058,760 | 1,539                 | 95%                     |
| AA952      | AA952B                 | 120723_M00436_0006 | 2,130,702 | 2,039,491 | 922                   | 95%                     |
| AA952      | AA952T                 | 120723_M00436_0006 | 2,701,764 | 2,629,638 | 1,287                 | 95%                     |
| AA1367     | AA1367B                | 120918_M00436_0001 | 4,132,296 | 4,103,434 | 2,225                 | 95%                     |
| AA1367     | AA1367T                | 120918_M00436_0001 | 3,575,528 | 3,514,050 | 1,872                 | 93%                     |
| AA960      | AA960B                 | 120825_M00436_0010 | 2,209,072 | 2,164,943 | 1,025                 | 95%                     |
| AA960      | AA960T                 | 120825_M00436_0010 | 2,368,496 | 2,318,341 | 1,025                 | 92%                     |
| AA1515     | AA1515B                | 120702_M00436_0003 | 4,018,844 | 3,985,206 | 2,194                 | 87%                     |
| AA1515     | AA1515T                | 120702_M00436_0003 | 3,170,656 | 3,147,053 | 1,735                 | 81%                     |
| UCI1546879 | UCI1546879B            | 121017_M00436_0007 | 2,737,470 | 2,568,080 | 1,152                 | 96%                     |
| UCI1546879 | UCI1546879T            | 121017_M00436_0007 | 2,512,712 | 2,458,068 | 1,246                 | 96%                     |
| UCI1689380 | UCI1689380B            | 121025_M00436_0010 | 4,325,160 | 4,011,880 | 2,015                 | 93%                     |
| UCI1689380 | UCI1689380T            | 121025_M00436_0010 | 3,617,706 | 3,523,676 | 1,784                 | 90%                     |



| Patient ID | Sample ID <sup>1</sup> | Run ID             | #Reads    | #Aligned  | Mean Read Coverage <sup>2</sup> | Coverage Uniformity <sup>3</sup> |
|------------|------------------------|--------------------|-----------|-----------|---------------------------------|----------------------------------|
| UCI1804937 | UCI1804937B            | 120927_M00436_0002 | 2,782,872 | 2,645,891 | 1,166                           | 92%                              |
| UCI1804937 | UCI1804937T            | 120927_M00436_0002 | 3,666,490 | 3,525,204 | 1,609                           | 87%                              |
| UCI1821517 | UCI1821517B            | 121005_M00436_0003 | 2,200,514 | 1,995,831 | 731                             | 94%                              |
| UCI1821517 | UCI1821517T            | 121005_M00436_0003 | 2,543,556 | 2,458,056 | 1,085                           | 94%                              |
| UCI1908503 | UCI1908503B            | 121005_M00436_0003 | 3,047,486 | 2,839,649 | 1,386                           | 94%                              |
| UCI1908503 | UCI1908503T            | 121005_M00436_0003 | 3,497,798 | 3,443,995 | 1,773                           | 89%                              |
| UCI1951813 | UCI1951813B            | 120927_M00436_0002 | 2,631,032 | 2,356,453 | 956                             | 92%                              |
| UCI1951813 | UCI1951813T            | 120927_M00436_0002 | 3,049,180 | 2,891,836 | 1,253                           | 90%                              |
| UCI2008866 | UCI2008866B            | 120727_M00436_0007 | 2,716,066 | 2,515,828 | 1,277                           | 95%                              |
| UCI2008866 | UCI2008866T            | 120727_M00436_0007 | 2,711,774 | 2,640,608 | 1,370                           | 94%                              |
| UCI2076630 | UCI2076630B            | 121025_M00436_0010 | 2,222,134 | 2,051,676 | 889                             | 95%                              |
| UCI2076630 | UCI2076630T            | 121025_M00436_0010 | 3,020,010 | 2,930,941 | 1,453                           | 89%                              |
| UCI2219330 | UCI2219330B            | 121019_M00436_0008 | 3,396,468 | 3,245,237 | 1,501                           | 96%                              |
| UCI2219330 | UCI2219330T            | 121019_M00436_0008 | 3,518,830 | 3,471,425 | 1,816                           | 95%                              |
| UCI2224680 | UCI2224680B            | 121017_M00436_0007 | 4,821,386 | 4,319,722 | 2,026                           | 93%                              |
| UCI2224680 | UCI2224680T            | 121017_M00436_0007 | 3,174,400 | 3,067,894 | 1,573                           | 90%                              |
| UCI2231576 | UCI2231576B            | 121023_M00436_0009 | 2,284,128 | 1,655,820 | 834                             | 95%                              |
| UCI2231576 | UCI2231576T            | 121023_M00436_0009 | 1,841,322 | 1,697,647 | 871                             | 94%                              |
| UCI2564879 | UCI2564879B            | 121017_M00436_0007 | 3,805,480 | 3,368,913 | 1,660                           | 88%                              |
| UCI2564879 | UCI2564879T            | 121017_M00436_0007 | 3,494,980 | 3,397,756 | 1,776                           | 87%                              |
| UCI2649875 | UCI2649875B            | 121008_M00436_0004 | 2,531,122 | 2,300,017 | 720                             | 95%                              |
| UCI2649875 | UCI2649875T            | 121008_M00436_0004 | 2,931,292 | 2,857,110 | 1,228                           | 91%                              |
| UCI3165498 | UCI3165498B            | 121019_M00436_0008 | 5,049,092 | 4,901,483 | 2,499                           | 96%                              |
| UCI3165498 | UCI3165498T            | 121019_M00436_0008 | 3,348,012 | 3,308,405 | 1,741                           | 91%                              |
| UCI3564897 | UCI3564897B            | 121019_M00436_0008 | 3,816,162 | 3,622,730 | 1,751                           | 96%                              |
| UCI3564897 | UCI3564897T            | 121019_M00436_0008 | 3,390,376 | 3,333,686 | 1,747                           | 88%                              |
| UCI4216548 | UCI4216548B            | 121017_M00436_0007 | 2,781,236 | 2,535,992 | 1,181                           | 96%                              |
| UCI4216548 | UCI4216548T            | 121017_M00436_0007 | 2,543,478 | 2,485,579 | 1,238                           | 90%                              |
| UCI8965412 | UCI8965412B            | 121019_M00436_0008 | 4,590,764 | 4,421,800 | 2,258                           | 95%                              |
| UCI8965412 | UCI8965412T            | 121019_M00436_0008 | 3,166,474 | 3,125,612 | 1,658                           | 84%                              |
| UCI9135402 | UCI9135402B            | 121008_M00436_0004 | 2,536,108 | 2,371,253 | 839                             | 95%                              |
| UCI9135402 | UCI9135402T            | 121008_M00436_0004 | 3,244,088 | 3,168,386 | 1,375                           | 93%                              |

1: B suffix indicates blood germline DNA, T suffix indicates tumor DNA

2: Average number of reads per amplicon

3: Fraction of base pair within 2 fold of the mean coverage

Table S6: List of non-silent somatic mutations

| Sample     | Chr   | Coord     | Ref Allele | Alt Allele | Gene   | AA Change* | Type     | Effect        | Allele Fraction (%) |       |
|------------|-------|-----------|------------|------------|--------|------------|----------|---------------|---------------------|-------|
|            |       |           |            |            |        |            |          |               | Normal              | Tumor |
| UCI1804937 | chr1  | 179078209 | G          | C          | ABL2   | D695E      | MISSENSE | NON_SYNONYMI  | 3.87                | 5.92  |
| UCI2649875 | chr14 | 105246445 | A          | C          | AKT1   | L52R       | MISSENSE | NON_SYNONYMI  | 0                   | 63.21 |
| AA952      | chr5  | 112175825 | G          | A          | APC    | D1512N     | MISSENSE | NON_SYNONYMI  | 0.22                | 13.84 |
| AA952      | chr11 | 108204663 | G          | C          | ATM    | E2660Q     | MISSENSE | NON_SYNONYMI  | 0                   | 13.54 |
| UCI4216548 | chr11 | 108124713 | GATCGCTGTC | G          | ATM    | NA         | NONE     | FRAME_SHIFT   | 0                   | 47.3  |
| UCI1908503 | chr7  | 140534596 | C          | T          | BRAF   | G106E      | MISSENSE | NON_SYNONYMI  | 0.29                | 13.58 |
| AA952      | chr17 | 41245012  | C          | T          | BRCA1  | E550K      | MISSENSE | NON_SYNONYMI  | 0.09                | 12.59 |
| AA952      | chr17 | 41246489  | C          | T          | BRCA1  | W306*      | NONSENSE | STOP_GAINED   | 0.08                | 17.65 |
| UCI2224680 | chr13 | 32913979  | G          | C          | BRCA2  | L1829F     | MISSENSE | NON_SYNONYMI  | 0                   | 1.73  |
| AA1106     | chr13 | 32912745  | T          | C          | BRCA2  | I1418T     | MISSENSE | NON_SYNONYMI  | 0.13                | 3.52  |
| AA1106     | chr16 | 68835732  | G          | A          | CDH1   | R108K      | MISSENSE | NON_SYNONYMI  | 1.02                | 15.98 |
| AA1106     | chr16 | 68849442  | C          | T          | CDH1   | Q388*      | NONSENSE | STOP_GAINED   | 0                   | 16.01 |
| AA1188     | chr16 | 68842325  | A          | C          | CDH1   | NA         | NONE     | SPLICE_SITE_I | 0.16                | 22.18 |
| AA930      | chr16 | 68846167  | G          | A          | CDH1   | NA         | NONE     | SPLICE_SITE_I | 0.17                | 23.79 |
| AA1090     | chr9  | 21971104  | G          | T          | CDKN2A | A85D       | MISSENSE | NON_SYNONYMI  | 0.17                | 65.93 |
| UCI1908503 | chr10 | 96745907  | A          | G          | CYP2C9 | K423E      | MISSENSE | NON_SYNONYMI  | 0.33                | 17.92 |
| AA1247     | chr17 | 37880261  | G          | C          | ERBB2  | D493H      | MISSENSE | NON_SYNONYMI  | 0                   | 4.85  |
| AA952      | chr17 | 37883585  | C          | G          | ERBB2  | S1036C     | MISSENSE | NON_SYNONYMI  | 0                   | 16.07 |
| AA1106     | chr17 | 37880220  | T          | C          | ERBB2  | L479S      | MISSENSE | NON_SYNONYMI  | 0.41                | 16.6  |
| AA952      | chr17 | 37883167  | C          | G          | ERBB2  | L1009V     | MISSENSE | NON_SYNONYMI  | 0.13                | 17.59 |
| AA952      | chr12 | 56495375  | G          | A          | ERBB3  | E1130K     | MISSENSE | NON_SYNONYMI  | 0.15                | 16.86 |
| UCI4216548 | chr8  | 38271295  | C          | G          | FGFR1  | D683H      | MISSENSE | NON_SYNONYMI  | 0.11                | 13.05 |
| UCI1908503 | chr10 | 123239488 | G          | C          | FGFR2  | Y666*      | NONSENSE | STOP_GAINED   | 0.37                | 16.86 |
| AA1367     | chr10 | 123256219 | C          | G          | FGFR2  | V156L      | MISSENSE | NON_SYNONYMI  | 0.47                | 21.53 |
| AA952      | chr10 | 8106058   | T          | A          | GATA3  | M293K      | MISSENSE | NON_SYNONYMI  | 0                   | 12.89 |
| AA1025     | chr10 | 8115874   | C          | CT         | GATA3  | NA         | NONE     | FRAME_SHIFT   | 0                   | 17.49 |
| AA948      | chr10 | 8111478   | A          | AC         | GATA3  | NA         | NONE     | FRAME_SHIFT   | 0.34                | 29.84 |
| AA960      | chr10 | 8111506   | A          | ATGCC      | GATA3  | NA         | NONE     | FRAME_SHIFT   | 0                   | 34.9  |
| AA926      | chr10 | 8111553   | C          | CT         | GATA3  | NA         | NONE     | FRAME_SHIFT   | 0                   | 40.59 |
| AA1090     | chr10 | 8111513   | T          | TG         | GATA3  | NA         | NONE     | FRAME_SHIFT   | 0                   | 43.46 |
| AA952      | chr9  | 5054787   | C          | T          | JAK2   | S131L      | MISSENSE | NON_SYNONYMI  | 0                   | 15.57 |
| UCI1908503 | chr9  | 5029872   | G          | A          | JAK2   | E106K      | MISSENSE | NON_SYNONYMI  | 0.06                | 16.11 |
| AA952      | chr19 | 17951135  | G          | C          | JAK3   | I386M      | MISSENSE | NON_SYNONYMI  | 0                   | 12.77 |
| AA952      | chr2  | 47643468  | C          | G          | MSH2   | L112V      | MISSENSE | NON_SYNONYMI  | 0                   | 15.92 |
| UCI2564879 | chr9  | 139391413 | C          | A          | NOTCH1 | G2260W     | MISSENSE | NON_SYNONYMI  | 0.03                | 35.05 |
| UCI1689380 | chr16 | 23637719  | C          | G          | PALB2  | NA         | NONE     | SPLICE_SITE_I | 0.09                | 45.22 |
| AA1204     | chr5  | 149515247 | C          | T          | PDGFRB | G15S       | MISSENSE | NON_SYNONYMI  | 0.15                | 11.36 |
| UCI1951813 | chr3  | 178936091 | G          | A          | PIK3CA | E545K      | MISSENSE | NON_SYNONYMI  | 0                   | 6.5   |
| AA952      | chr3  | 178936091 | G          | A          | PIK3CA | E545K      | MISSENSE | NON_SYNONYMI  | 0.18                | 16.47 |
| AA1204     | chr3  | 178952085 | A          | G          | PIK3CA | H1047R     | MISSENSE | NON_SYNONYMI  | 0.21                | 26.31 |
| AA957      | chr3  | 178936082 | G          | A          | PIK3CA | E542K      | MISSENSE | NON_SYNONYMI  | 0.2                 | 27.97 |
| AA948      | chr3  | 178936091 | G          | A          | PIK3CA | E545K      | MISSENSE | NON_SYNONYMI  | 0.2                 | 34.12 |
| UCI2564879 | chr3  | 178927980 | T          | C          | PIK3CA | C420R      | MISSENSE | NON_SYNONYMI  | 0.63                | 35.9  |
| AA1267     | chr3  | 178952085 | A          | G          | PIK3CA | H1047R     | MISSENSE | NON_SYNONYMI  | 0                   | 44.68 |
| UCI1908503 | chr3  | 178952085 | A          | G          | PIK3CA | H1047R     | MISSENSE | NON_SYNONYMI  | 0.13                | 49.04 |
| AA1515     | chr3  | 178936091 | G          | A          | PIK3CA | E545K      | MISSENSE | NON_SYNONYMI  | 0                   | 69.74 |
| UCI1546879 | chr5  | 67591106  | A          | G          | PIK3R1 | K204E      | MISSENSE | NON_SYNONYMI  | 1.68                | 30.26 |
| AA1106     | chr7  | 6038848   | C          | T          | PMS2   | R152H      | MISSENSE | NON_SYNONYMI  | 0                   | 6.32  |
| UCI2076630 | chr7  | 6029551   | G          | C          | PMS2   | Q236E      | MISSENSE | NON_SYNONYMI  | 0.5                 | 15.97 |
| AA1106     | chr10 | 89692856  | GAAGAT     | G          | PTEN   | NA         | NONE     | FRAME_SHIFT   | 0                   | 5.24  |
| UCI1689380 | chr17 | 38512437  | C          | A          | RARA   | P337T      | MISSENSE | NON_SYNONYMI  | 0.08                | 14.35 |
| UCI2008866 | chr13 | 49050847  | AGT        | A          | RB1    | NA         | NONE     | FRAME_SHIFT   | 0                   | 78.52 |
| AA1367     | chr17 | 7578550   | G          | T          | TP53   | S116Y      | MISSENSE | NON_SYNONYMI  | 0.16                | 36.33 |
| AA1222     | chr17 | 7578526   | C          | T          | TP53   | C124Y      | MISSENSE | NON_SYNONYMI  | 0.15                | 40.37 |
| AA1204     | chr17 | 7577538   | C          | T          | TP53   | R116Q      | MISSENSE | NON_SYNONYMI  | 0.23                | 41.52 |
| UCI8965412 | chr17 | 7576867   | AT         | A          | TP53   | NA         | NONE     | FRAME_SHIFT   | 0                   | 42.22 |
| UCI1821517 | chr17 | 7579536   | C          | A          | TP53   | E51*       | NONSENSE | STOP_GAINED   | 0                   | 45.35 |
| UCI1908503 | chr17 | 7577538   | C          | T          | TP53   | R116Q      | MISSENSE | NON_SYNONYMI  | 0.27                | 47.82 |
| AA1077     | chr17 | 7578505   | G          | A          | TP53   | P10L       | MISSENSE | NON_SYNONYMI  | 0.23                | 48.35 |
| AA1077     | chr17 | 7578475   | G          | A          | TP53   | P141L      | MISSENSE | NON_SYNONYMI  | 0.27                | 48.41 |
| AA1077     | chr17 | 7578458   | G          | A          | TP53   | R147C      | MISSENSE | NON_SYNONYMI  | 0.11                | 48.53 |
| AA1307     | chr17 | 7577580   | T          | C          | TP53   | Y102C      | MISSENSE | NON_SYNONYMI  | 0.48                | 56.96 |
| UCI2008866 | chr17 | 7577121   | G          | A          | TP53   | R141C      | MISSENSE | NON_SYNONYMI  | 0                   | 78.5  |
| UCI3165498 | chr17 | 7577094   | G          | A          | TP53   | R150W      | MISSENSE | NON_SYNONYMI  | 0.2                 | 79.04 |
| UCI3564897 | chr17 | 7574003   | G          | A          | TP53   | R331*      | NONSENSE | STOP_GAINED   | 0                   | 79.33 |
| AA1090     | chr17 | 7578441   | G          | T          | TP53   | Y152*      | NONSENSE | STOP_GAINED   | 0                   | 82.18 |
| AA1277     | chr17 | 7578382   | G          | C          | TP53   | S172*      | NONSENSE | STOP_GAINED   | 0.12                | 85.52 |
| UCI4216548 | chr17 | 7579424   | GC         | G          | TP53   | NA         | NONE     | FRAME_SHIFT   | 0.12                | 85.55 |

\* as reported y SNPEff

**Table S7: List of mutations which segregate into two significantly different groups of allelic fractions in the tumors of 3 patients.**

| Patient    | Gene   | AA Change | TAF   | Average TAF | P-value |
|------------|--------|-----------|-------|-------------|---------|
| AA 952     | APC    | D1512N    | 13.8  | 13.1        | 8.8E-06 |
|            | ATM    | E1312Q    | 13.5  |             |         |
|            | GATA3  | M294K     | 12.9  |             |         |
|            | JAK3   | I386M     | 12.8  |             |         |
|            | BRCA1  | E550K     | 12.6  |             |         |
|            | BRCA1  | W57*      | 17.7  | 16.6        |         |
|            | ERBB2  | L1024V    | 17.6  |             |         |
|            | ERBB3  | E1189K    | 16.8  |             |         |
|            | PIK3CA | E545K     | 16.5  |             |         |
|            | ERBB2  | S1066C    | 16.1  |             |         |
|            | MSH2   | L326V     | 15.9  |             |         |
|            | JAK2   | S280L     | 15.6  |             |         |
| AA1106     | BRCA2  | I1418T    | 3.52  | 5.0         | 1.8E-04 |
|            | PTEN   | E114fs    | 5.24  |             |         |
|            | PMS2   | R199H     | 6.32  |             |         |
|            | CDH1   | R108K     | 15.98 | 16.2        |         |
|            | CDH1   | Q449*     | 16.01 |             |         |
|            | ERBB2  | L755S     | 16.6  |             |         |
| UCI1908503 | BRAF   | G106E     | 13.58 | 16.1        | 2.3E-05 |
|            | CYP2C9 | K423E     | 17.92 |             |         |
|            | FGFR2  | Y783*     | 16.86 |             |         |
|            | JAK2   | E106K     | 16.11 |             |         |
|            | PIK3CA | H1047R    | 49.04 | 48.4        |         |
|            | TP53   | R248Q     | 47.82 |             |         |

Table S8: List of non-silent germline variants

| Sample     | Chr   | Cord      | rsID        | Ref Allele | Alt Allele | Allelic Fraction |       | Gene   | AA change | Type     | Effect      | Mutation Taster Prediction |
|------------|-------|-----------|-------------|------------|------------|------------------|-------|--------|-----------|----------|-------------|----------------------------|
|            |       |           |             |            |            | Normal           | Tumor |        |           |          |             |                            |
| AA1025     | chr1  | 179112145 | rs1318056   | C          | G          | 46.49            | 65.25 | ABL2   | S12T      | MISSENSE | NON_SYNON_P | P                          |
| AA1090     | chr1  | 179112145 | rs1318056   | C          | G          | 50.77            | 60.16 | ABL2   | S12T      | MISSENSE | NON_SYNON_P | P                          |
| AA943      | chr1  | 179112145 | rs1318056   | C          | G          | 53.16            | 45.83 | ABL2   | S12T      | MISSENSE | NON_SYNON_P | P                          |
| AA1188     | chr1  | 179112145 | rs1318056   | C          | G          | 52.28            | 40.18 | ABL2   | S12T      | MISSENSE | NON_SYNON_P | P                          |
| AA1222     | chr1  | 179112145 | rs1318056   | C          | G          | 51.74            | 44.85 | ABL2   | S12T      | MISSENSE | NON_SYNON_P | P                          |
| AA1267     | chr1  | 179112145 | rs1318056   | C          | G          | 49.79            | 36.8  | ABL2   | S12T      | MISSENSE | NON_SYNON_P | P                          |
| AA1307     | chr1  | 179112145 | rs1318056   | C          | G          | 50               | 50.89 | ABL2   | S12T      | MISSENSE | NON_SYNON_P | P                          |
| AA926      | chr1  | 179112145 | rs1318056   | C          | G          | 51.71            | 28.38 | ABL2   | S12T      | MISSENSE | NON_SYNON_P | P                          |
| UC11821517 | chr1  | 179112145 | rs1318056   | C          | G          | 45.1             | 81.14 | ABL2   | S12T      | MISSENSE | NON_SYNON_P | P                          |
| UC12008866 | chr1  | 179112145 | rs1318056   | C          | G          | 51.71            | 54.03 | ABL2   | S12T      | MISSENSE | NON_SYNON_P | P                          |
| UC12076630 | chr1  | 179112145 | rs1318056   | C          | G          | 43.15            | 69.14 | ABL2   | S12T      | MISSENSE | NON_SYNON_P | P                          |
| UC12649875 | chr1  | 179112145 | rs1318056   | C          | G          | 45.35            | 17.04 | ABL2   | S12T      | MISSENSE | NON_SYNON_P | P                          |
| UC13564897 | chr1  | 179112145 | rs1318056   | C          | G          | 53.56            | 10.37 | ABL2   | S12T      | MISSENSE | NON_SYNON_P | P                          |
| UC12231576 | chr14 | 105238734 | rs146483593 | C          | T          | 43.51            | 55.37 | AKT1   | G105S     | MISSENSE | NON_SYNON_D |                            |
| UC13564897 | chr7  | 117188715 | rs3034796   | GAAAGC     | G          | 15.06            | 14.83 | CFTR   | NA        | NONE     | FRAME_SHIFT | NA                         |
| AA1025     | chr2  | 29416366  | rs1881421   | G          | C          | 52.74            | 47.01 | ALK    | D1529E    | MISSENSE | NON_SYNON_P | P                          |
| AA1025     | chr2  | 29416481  | rs1881420   | T          | C          | 47.17            | 48.57 | ALK    | K1491R    | MISSENSE | NON_SYNON_P | P                          |
| AA1025     | chr2  | 29416572  | rs1670283   | T          | C          | 99.83            | 99.85 | ALK    | I1461V    | MISSENSE | NON_SYNON_N |                            |
| AA1077     | chr2  | 29416366  | rs1881421   | G          | C          | 43.57            | 54.35 | ALK    | D1529E    | MISSENSE | NON_SYNON_P | P                          |
| AA1077     | chr2  | 29416481  | rs1881420   | T          | C          | 50.09            | 52.43 | ALK    | K1491R    | MISSENSE | NON_SYNON_P | P                          |
| AA1090     | chr2  | 29416572  | rs1670283   | T          | C          | 100              | 99.93 | ALK    | I1461V    | MISSENSE | NON_SYNON_N |                            |
| AA943      | chr2  | 29416572  | rs1670283   | T          | C          | 99.93            | 99.94 | ALK    | I1461V    | MISSENSE | NON_SYNON_N |                            |
| AA1188     | chr2  | 29416572  | rs1670283   | T          | C          | 99.95            | 99.93 | ALK    | I1461V    | MISSENSE | NON_SYNON_N |                            |
| AA1204     | chr2  | 29416572  | rs1670283   | T          | C          | 99.96            | 99.73 | ALK    | I1461V    | MISSENSE | NON_SYNON_N |                            |
| AA1222     | chr2  | 29416572  | rs1670283   | T          | C          | 99.81            | 99.88 | ALK    | I1461V    | MISSENSE | NON_SYNON_N |                            |
| AA1247     | chr2  | 29416572  | rs1670283   | T          | C          | 100              | 99.9  | ALK    | I1461V    | MISSENSE | NON_SYNON_N |                            |
| AA1267     | chr2  | 29416366  | rs1881421   | G          | C          | 46.95            | 44.18 | ALK    | D1529E    | MISSENSE | NON_SYNON_P | P                          |
| AA1267     | chr2  | 29416481  | rs1881420   | T          | C          | 46.23            | 52.19 | ALK    | K1491R    | MISSENSE | NON_SYNON_P | P                          |
| AA1267     | chr2  | 29416572  | rs1670283   | T          | C          | 99.93            | 99.87 | ALK    | I1461V    | MISSENSE | NON_SYNON_N |                            |
| AA1277     | chr2  | 29416366  | rs1881421   | G          | C          | 100              | 99.79 | ALK    | D1529E    | MISSENSE | NON_SYNON_P | P                          |
| AA1277     | chr2  | 29416481  | rs1881420   | T          | C          | 100              | 99.6  | ALK    | K1491R    | MISSENSE | NON_SYNON_P | P                          |
| AA1277     | chr2  | 29416572  | rs1670283   | T          | C          | 99.83            | 99.78 | ALK    | I1461V    | MISSENSE | NON_SYNON_N |                            |
| AA1307     | chr2  | 29416572  | rs1670283   | T          | C          | 99.87            | 99.87 | ALK    | I1461V    | MISSENSE | NON_SYNON_N |                            |
| AA957      | chr2  | 29416366  | rs1881421   | G          | C          | 99.75            | 99.71 | ALK    | D1529E    | MISSENSE | NON_SYNON_P | P                          |
| AA957      | chr2  | 29416481  | rs1881420   | T          | C          | 46.98            | 47.03 | ALK    | K1491R    | MISSENSE | NON_SYNON_P | P                          |
| AA957      | chr2  | 29416572  | rs1670283   | T          | C          | 99.71            | 99.74 | ALK    | I1461V    | MISSENSE | NON_SYNON_N |                            |
| AA926      | chr2  | 29416366  | rs1881421   | G          | C          | 99.93            | 99.83 | ALK    | D1529E    | MISSENSE | NON_SYNON_P | P                          |
| AA926      | chr2  | 29416481  | rs1881420   | T          | C          | 99.56            | 99.68 | ALK    | K1491R    | MISSENSE | NON_SYNON_P | P                          |
| AA926      | chr2  | 29416572  | rs1670283   | T          | C          | 99.82            | 99.93 | ALK    | I1461V    | MISSENSE | NON_SYNON_N |                            |
| AA930      | chr2  | 29416366  | rs1881421   | G          | C          | 99.7             | 99.88 | ALK    | D1529E    | MISSENSE | NON_SYNON_P | P                          |
| AA930      | chr2  | 29416481  | rs1881420   | T          | C          | 99.33            | 99.22 | ALK    | K1491R    | MISSENSE | NON_SYNON_P | P                          |
| AA930      | chr2  | 29416572  | rs1670283   | T          | C          | 99.62            | 99.91 | ALK    | I1461V    | MISSENSE | NON_SYNON_N |                            |
| AA1106     | chr2  | 29416366  | rs1881421   | G          | C          | 53.4             | 42.74 | ALK    | D1529E    | MISSENSE | NON_SYNON_P | P                          |
| AA1106     | chr2  | 29416481  | rs1881420   | T          | C          | 46.55            | 37.58 | ALK    | K1491R    | MISSENSE | NON_SYNON_P | P                          |
| AA1106     | chr2  | 29416572  | rs1670283   | T          | C          | 99.89            | 99.95 | ALK    | I1461V    | MISSENSE | NON_SYNON_N |                            |
| AA948      | chr2  | 29416366  | rs1881421   | G          | C          | 50.86            | 52.3  | ALK    | D1529E    | MISSENSE | NON_SYNON_P | P                          |
| AA948      | chr2  | 29416481  | rs1881420   | T          | C          | 58.7             | 48.91 | ALK    | K1491R    | MISSENSE | NON_SYNON_P | P                          |
| AA948      | chr2  | 29416572  | rs1670283   | T          | C          | 100              | 100   | ALK    | I1461V    | MISSENSE | NON_SYNON_N |                            |
| UC18965412 | chr2  | 29474026  | rs147858673 | C          | T          | 55.52            | 52.9  | ALK    | EY17K     | MISSENSE | NON_SYNON_D |                            |
| AA952      | chr2  | 29416366  | rs1881421   | G          | C          | 51.83            | 49.14 | ALK    | D1529E    | MISSENSE | NON_SYNON_P | P                          |
| AA952      | chr2  | 29416572  | rs1670283   | T          | C          | 100              | 99.91 | ALK    | I1461V    | MISSENSE | NON_SYNON_N |                            |
| AA1367     | chr2  | 29416366  | rs1881421   | G          | C          | 49.42            | 50.85 | ALK    | D1529E    | MISSENSE | NON_SYNON_P | P                          |
| AA1367     | chr2  | 29416481  | rs1881420   | T          | C          | 51.07            | 49.16 | ALK    | K1491R    | MISSENSE | NON_SYNON_P | P                          |
| AA1367     | chr2  | 29416572  | rs1670283   | T          | C          | 99.89            | 99.92 | ALK    | I1461V    | MISSENSE | NON_SYNON_N |                            |
| AA960      | chr2  | 29416366  | rs1881421   | G          | C          | 48.64            | 63.2  | ALK    | D1529E    | MISSENSE | NON_SYNON_P | P                          |
| AA960      | chr2  | 29416481  | rs1881420   | T          | C          | 46.98            | 58.39 | ALK    | K1491R    | MISSENSE | NON_SYNON_P | P                          |
| AA960      | chr2  | 29416572  | rs1670283   | T          | C          | 100              | 99.68 | ALK    | I1461V    | MISSENSE | NON_SYNON_N |                            |
| AA1515     | chr2  | 29416366  | rs1881421   | G          | C          | 51.74            | 49.39 | ALK    | D1529E    | MISSENSE | NON_SYNON_P | P                          |
| AA1515     | chr2  | 29416481  | rs1881420   | T          | C          | 46.98            | 50.02 | ALK    | K1491R    | MISSENSE | NON_SYNON_P | P                          |
| AA1515     | chr2  | 29416572  | rs1670283   | T          | C          | 99.86            | 99.96 | ALK    | I1461V    | MISSENSE | NON_SYNON_N |                            |
| UC11546879 | chr2  | 29416572  | rs1670283   | T          | C          | 100              | 100   | ALK    | I1461V    | MISSENSE | NON_SYNON_N |                            |
| UC11689380 | chr2  | 29416366  | rs1881421   | G          | C          | 55.72            | 58.02 | ALK    | D1529E    | MISSENSE | NON_SYNON_P | P                          |
| UC11689380 | chr2  | 29416481  | rs1881420   | T          | C          | 43.3             | 63.5  | ALK    | K1491R    | MISSENSE | NON_SYNON_P | P                          |
| UC11689380 | chr2  | 29416572  | rs1670283   | T          | C          | 99.53            | 100   | ALK    | I1461V    | MISSENSE | NON_SYNON_N |                            |
| UC18965412 | chr2  | 29446394  | .           | A          | G          | 50.42            | 49.28 | ALK    | V1058A    | MISSENSE | NON_SYNON_D |                            |
| UC11804937 | chr2  | 29416572  | rs1670283   | T          | C          | 99.38            | 99.55 | ALK    | I1461V    | MISSENSE | NON_SYNON_N |                            |
| UC11821517 | chr7  | 117188715 | rs3034796   | GAAAGC     | G          | 15.18            | 11.65 | CFTR   | NA        | NONE     | FRAME_SHIFT | NA                         |
| UC11821517 | chr2  | 29416572  | rs1670283   | T          | C          | 99.34            | 99.55 | ALK    | I1461V    | MISSENSE | NON_SYNON_N |                            |
| AA1204     | chr2  | 29497967  | rs35228363  | G          | A          | 50.58            | 47.05 | ALK    | T680I     | MISSENSE | NON_SYNON_D |                            |
| AA930      | chr22 | 42524820  | rs3831704   | T          | TC         | 15.26            | 12.19 | CYP2D6 | NA        | NONE     | FRAME_SHIFT | NA                         |
| UC11908503 | chr2  | 29416366  | rs1881421   | G          | C          | 44.43            | 45.69 | ALK    | D1529E    | MISSENSE | NON_SYNON_P | P                          |
| UC11908503 | chr2  | 29416481  | rs1881420   | T          | C          | 40.82            | 49.39 | ALK    | K1491R    | MISSENSE | NON_SYNON_P | P                          |
| UC11908503 | chr2  | 29416572  | rs1670283   | T          | C          | 99.18            | 99.94 | ALK    | I1461V    | MISSENSE | NON_SYNON_N |                            |
| UC12649875 | chr2  | 29497967  | rs35228363  | G          | A          | 56.91            | 46.5  | ALK    | T680I     | MISSENSE | NON_SYNON_D |                            |
| UC11951813 | chr2  | 29416366  | rs1881421   | G          | C          | 48.01            | 49.55 | ALK    | D1529E    | MISSENSE | NON_SYNON_P | P                          |
| UC11951813 | chr2  | 29416481  | rs1881420   | T          | C          | 44.92            | 51.16 | ALK    | K1491R    | MISSENSE | NON_SYNON_P | P                          |
| UC11951813 | chr2  | 29416572  | rs1670283   | T          | C          | 99.32            | 99.28 | ALK    | I1461V    | MISSENSE | NON_SYNON_N |                            |
| UC12008866 | chr2  | 29416572  | rs1670283   | T          | C          | 100              | 99.76 | ALK    | I1461V    | MISSENSE | NON_SYNON_N |                            |
| UC12076630 | chr2  | 29416572  | rs1670283   | T          | C          | 100              | 99.47 | ALK    | I1461V    | MISSENSE | NON_SYNON_N |                            |
| UC12076630 | chr2  | 29543736  | rs35093491  | A          | G          | 47.82            | 60.98 | ALK    | V476A     | MISSENSE | NON_SYNON_N |                            |
| UC12219330 | chr2  | 29416572  | rs1670283   | T          | C          | 45.72            | 47.34 | ALK    | I1461V    | MISSENSE | NON_SYNON_N |                            |
| UC18965412 | chr7  | 117188715 | rs3034796   | GAAAGC     | G          | 15.27            | 11.71 | CFTR   | NA        | NONE     | FRAME_SHIFT | NA                         |
| UC12224680 | chr2  | 29416366  | rs1881421   | G          | C          | 99.67            | 99.54 | ALK    | D1529E    | MISSENSE | NON_SYNON_P | P                          |
| UC12224680 | chr2  | 29416481  | rs1881420   | T          | C          | 99.89            | 99.66 | ALK    | K1491R    | MISSENSE | NON_SYNON_P | P                          |
| UC12224680 | chr2  | 29416572  | rs1670283   | T          | C          | 99.96            | 99.96 | ALK    | I1461V    | MISSENSE | NON_SYNON_N |                            |
| UC11951813 | chr8  | 38277052  | .           | GT         | G          | 15.36            | 10.42 | FGFR1  | NA        | NONE     | FRAME_SHIFT | NA                         |
| UC12231576 | chr2  | 29416366  | rs1881421   | G          | C          | 99.37            | 99.85 | ALK    | D1529E    | MISSENSE | NON_SYNON_P | P                          |
| UC12231576 | chr2  | 29416481  | rs1881420   | T          | C          | 47.35            | 50.13 | ALK    | K1491R    | MISSENSE | NON_SYNON_P | P                          |
| UC12231576 | chr2  | 29416572  | rs1670283   | T          | C          | 100              | 99.57 | ALK    | I1461V    | MISSENSE | NON_SYNON_N |                            |
| UC11546879 | chr2  | 29497967  | rs35228363  | G          | A          | 43.74            | 36.75 | ALK    | T680I     | MISSENSE | NON_SYNON_D |                            |
| UC12564879 | chr2  | 29416366  | rs1881421   | G          | C          | 53.41            | 64.06 | ALK    | D1529E    | MISSENSE | NON_SYNON_P | P                          |
| UC12564879 | chr2  | 29416481  | rs1881420   | T          | C          | 48.33            | 60.73 | ALK    | K1491R    | MISSENSE | NON_SYNON_P | P                          |
| UC12564879 | chr2  | 29416572  | rs1670283   | T          | C          | 100              | 100   | ALK    | I1461V    | MISSENSE | NON_SYNON_N |                            |
| UC12649875 | chr2  | 29416366  | rs1881421   | G          | C          | 99.15            | 98.8  | ALK    | D1529E    | MISSENSE | NON_SYNON_P | P                          |
| UC12649875 | chr2  | 29416481  | rs1881420   | T          | C          | 98.91            | 99.56 | ALK    | K1491R    | MISSENSE | NON_SYNON_P | P                          |
| UC12649875 | chr2  | 29416572  | rs1670283   | T          | C          | 99.79            | 99.24 | ALK    | I1461V    | MISSENSE | NON_SYNON_N |                            |
| UC13165498 | chr2  | 29416366  | rs1881421   | G          | C          | 99.76            | 99.86 | ALK    | D1529E    | MISSENSE | NON_SYNON_P | P                          |
| UC13165498 | chr2  | 29416481  | rs1881420   | T          | C          | 99.81            | 99.55 | ALK    | K1491R    | MISSENSE | NON_SYNON_P | P                          |
| UC13165498 | chr2  | 29416572  | rs1670283   | T          | C          | 99.96            | 99.69 | ALK    | I1461V    | MISSENSE | NON_SYNON_N |                            |
| UC13564897 | chr2  | 29416572  | rs1670283   | T          | C          | 99.88            | 99.95 | ALK    | I1461V    | MISSENSE | NON_SYNON_N |                            |

Table S8: List of non-silent germline variants

| Sample     | Chr   | Cord      | rsID        | Ref Allele | Alt Allele | Allelic Fraction |       | Gene   | AA change | Type     | Effect        | Mutation Taster Prediction |
|------------|-------|-----------|-------------|------------|------------|------------------|-------|--------|-----------|----------|---------------|----------------------------|
|            |       |           |             |            |            | Normal           | Tumor |        |           |          |               |                            |
| UCI4216548 | chr2  | 29416572  | rs1670283   | T          | C          | 99.82            | 99.21 | ALK    | I1461V    | MISSENSE | NON_SYNON'N   |                            |
| UCI8965412 | chr2  | 29416366  | rs1881421   | G          | C          | 46.47            | 46.63 | ALK    | D1529E    | MISSENSE | NON_SYNON'P   |                            |
| UCI8965412 | chr2  | 29416481  | rs1881420   | T          | C          | 52.43            | 50.36 | ALK    | K1491R    | MISSENSE | NON_SYNON'P   |                            |
| UCI8965412 | chr2  | 29416572  | rs1670283   | T          | C          | 99.55            | 100   | ALK    | I1461V    | MISSENSE | NON_SYNON'N   |                            |
| UCI9135402 | chr9  | 139407486 | .           | CA         | C          | 15.38            | 15    | NOTCH1 | NA        | NONE     | FRAME_SHIF'NA |                            |
| UCI9135402 | chr2  | 29416366  | rs1881421   | G          | C          | 99.17            | 98.98 | ALK    | D1529E    | MISSENSE | NON_SYNON'P   |                            |
| UCI9135402 | chr2  | 29416572  | rs1670283   | T          | C          | 99.63            | 99.44 | ALK    | I1461V    | MISSENSE | NON_SYNON'N   |                            |
| AA1025     | chr5  | 112176756 | rs459552    | T          | A          | 52.65            | 70.77 | APC    | V1822D    | MISSENSE | NON_SYNON'P   |                            |
| AA1077     | chr5  | 112176756 | rs459552    | T          | A          | 99.85            | 99.65 | APC    | V1822D    | MISSENSE | NON_SYNON'P   |                            |
| AA1090     | chr5  | 112176756 | rs459552    | T          | A          | 54.3             | 39.75 | APC    | V1822D    | MISSENSE | NON_SYNON'P   |                            |
| AA943      | chr5  | 112176756 | rs459552    | T          | A          | 99.31            | 99.61 | APC    | V1822D    | MISSENSE | NON_SYNON'P   |                            |
| AA1188     | chr5  | 112176756 | rs459552    | T          | A          | 99.72            | 99.73 | APC    | V1822D    | MISSENSE | NON_SYNON'P   |                            |
| AA1204     | chr5  | 112176756 | rs459552    | T          | A          | 99.48            | 99.48 | APC    | V1822D    | MISSENSE | NON_SYNON'P   |                            |
| AA1222     | chr5  | 112176756 | rs459552    | T          | A          | 99.68            | 100   | APC    | V1822D    | MISSENSE | NON_SYNON'P   |                            |
| AA1247     | chr5  | 112176756 | rs459552    | T          | A          | 99.78            | 99.78 | APC    | V1822D    | MISSENSE | NON_SYNON'P   |                            |
| AA1247     | chr5  | 112178795 | rs2229995   | G          | A          | 48.9             | 37.51 | APC    | G2502S    | MISSENSE | NON_SYNON'N   |                            |
| AA1267     | chr5  | 112176756 | rs459552    | T          | A          | 99.69            | 99.71 | APC    | V1822D    | MISSENSE | NON_SYNON'P   |                            |
| AA1277     | chr5  | 112176756 | rs459552    | T          | A          | 58.49            | 9.98  | APC    | V1822D    | MISSENSE | NON_SYNON'P   |                            |
| AA1307     | chr5  | 112176756 | rs459552    | T          | A          | 54.23            | 71.24 | APC    | V1822D    | MISSENSE | NON_SYNON'P   |                            |
| AA957      | chr5  | 112176756 | rs459552    | T          | A          | 45.91            | 53.97 | APC    | V1822D    | MISSENSE | NON_SYNON'P   |                            |
| AA926      | chr5  | 112176756 | rs459552    | T          | A          | 99.81            | 99.7  | APC    | V1822D    | MISSENSE | NON_SYNON'P   |                            |
| AA930      | chr5  | 112176756 | rs459552    | T          | A          | 98.49            | 99.91 | APC    | V1822D    | MISSENSE | NON_SYNON'P   |                            |
| AA1106     | chr5  | 112176756 | rs459552    | T          | A          | 99.35            | 99.19 | APC    | V1822D    | MISSENSE | NON_SYNON'P   |                            |
| AA948      | chr5  | 112176756 | rs459552    | T          | A          | 98.73            | 99.51 | APC    | V1822D    | MISSENSE | NON_SYNON'P   |                            |
| AA952      | chr5  | 112176756 | rs459552    | T          | A          | 99.85            | 100   | APC    | V1822D    | MISSENSE | NON_SYNON'P   |                            |
| AA952      | chr5  | 112178795 | rs2229995   | G          | A          | 52.77            | 49.44 | APC    | G2502S    | MISSENSE | NON_SYNON'N   |                            |
| AA1367     | chr5  | 112176756 | rs459552    | T          | A          | 52.33            | 27.44 | APC    | V1822D    | MISSENSE | NON_SYNON'P   |                            |
| AA960      | chr5  | 112176756 | rs459552    | T          | A          | 100              | 99.76 | APC    | V1822D    | MISSENSE | NON_SYNON'P   |                            |
| AA1515     | chr5  | 112176756 | rs459552    | T          | A          | 99.73            | 99.92 | APC    | V1822D    | MISSENSE | NON_SYNON'P   |                            |
| UCI1546879 | chr5  | 112176756 | rs459552    | T          | A          | 99.88            | 99.75 | APC    | V1822D    | MISSENSE | NON_SYNON'P   |                            |
| UCI1689380 | chr5  | 112102960 | rs139196838 | C          | T          | 49.52            | 92.48 | APC    | R109W     | MISSENSE | NON_SYNON'N   |                            |
| UCI1689380 | chr5  | 112176756 | rs459552    | T          | A          | 52.28            | 10.79 | APC    | V1822D    | MISSENSE | NON_SYNON'P   |                            |
| UCI1804937 | chr5  | 112176756 | rs459552    | T          | A          | 98.42            | 97.89 | APC    | V1822D    | MISSENSE | NON_SYNON'P   |                            |
| UCI1821517 | chr5  | 112176756 | rs459552    | T          | A          | 98.9             | 99.62 | APC    | V1822D    | MISSENSE | NON_SYNON'P   |                            |
| UCI1908503 | chr5  | 112176756 | rs459552    | T          | A          | 99.86            | 99.22 | APC    | V1822D    | MISSENSE | NON_SYNON'P   |                            |
| UCI1951813 | chr5  | 112176756 | rs459552    | T          | A          | 96.98            | 97.64 | APC    | V1822D    | MISSENSE | NON_SYNON'P   |                            |
| UCI2008866 | chr5  | 112176756 | rs459552    | T          | A          | 100              | 99.74 | APC    | V1822D    | MISSENSE | NON_SYNON'P   |                            |
| UCI2076630 | chr5  | 112176756 | rs459552    | T          | A          | 52.85            | 46.38 | APC    | V1822D    | MISSENSE | NON_SYNON'P   |                            |
| UCI2219330 | chr5  | 112176756 | rs459552    | T          | A          | 41.36            | 46.76 | APC    | V1822D    | MISSENSE | NON_SYNON'P   |                            |
| UCI2224680 | chr5  | 112176756 | rs459552    | T          | A          | 99.51            | 99.65 | APC    | V1822D    | MISSENSE | NON_SYNON'P   |                            |
| UCI2231576 | chr5  | 112176756 | rs459552    | T          | A          | 98.73            | 100   | APC    | V1822D    | MISSENSE | NON_SYNON'P   |                            |
| UCI2564879 | chr5  | 112176756 | rs459552    | T          | A          | 99.24            | 100   | APC    | V1822D    | MISSENSE | NON_SYNON'P   |                            |
| UCI2649875 | chr5  | 112176756 | rs459552    | T          | A          | 48.63            | 48.27 | APC    | V1822D    | MISSENSE | NON_SYNON'P   |                            |
| UCI3165498 | chr5  | 112176756 | rs459552    | T          | A          | 99.7             | 98.89 | APC    | V1822D    | MISSENSE | NON_SYNON'P   |                            |
| UCI3165498 | chr5  | 112178795 | rs2229995   | G          | A          | 45.24            | 19.29 | APC    | G2502S    | MISSENSE | NON_SYNON'N   |                            |
| UCI3564897 | chr5  | 112176756 | rs459552    | T          | A          | 99.62            | 99.79 | APC    | V1822D    | MISSENSE | NON_SYNON'P   |                            |
| UCI4216548 | chr5  | 112176756 | rs459552    | T          | A          | 100              | 99.71 | APC    | V1822D    | MISSENSE | NON_SYNON'P   |                            |
| UCI8965412 | chr5  | 112176756 | rs459552    | T          | A          | 60.31            | 56.37 | APC    | V1822D    | MISSENSE | NON_SYNON'P   |                            |
| UCI9135402 | chr5  | 112176756 | rs459552    | T          | A          | 98.97            | 98.9  | APC    | V1822D    | MISSENSE | NON_SYNON'P   |                            |
| AA1025     | chr11 | 108183167 | rs659243    | A          | G          | 100              | 99.92 | ATM    | N1983S    | MISSENSE | NON_SYNON'N   |                            |
| AA1077     | chr11 | 108106443 | rs2234997   | T          | A          | 48.8             | 17.8  | ATM    | D126E     | MISSENSE | NON_SYNON'N   |                            |
| AA1077     | chr11 | 108175462 | rs1801516   | G          | A          | 55.74            | 81.53 | ATM    | D1853N    | MISSENSE | NON_SYNON'P   |                            |
| AA1077     | chr11 | 108183167 | rs659243    | A          | G          | 99.89            | 99.76 | ATM    | N1983S    | MISSENSE | NON_SYNON'N   |                            |
| AA1090     | chr11 | 108175462 | rs1801516   | G          | A          | 99.7             | 99.69 | ATM    | D1853N    | MISSENSE | NON_SYNON'P   |                            |
| AA1090     | chr11 | 108183167 | rs659243    | A          | G          | 99.89            | 99.6  | ATM    | N1983S    | MISSENSE | NON_SYNON'N   |                            |
| AA943      | chr11 | 108183167 | rs659243    | A          | G          | 99.74            | 99.79 | ATM    | N1983S    | MISSENSE | NON_SYNON'N   |                            |
| AA1188     | chr11 | 108183167 | rs659243    | A          | G          | 100              | 100   | ATM    | N1983S    | MISSENSE | NON_SYNON'N   |                            |
| AA1204     | chr11 | 108183167 | rs659243    | A          | G          | 99.88            | 99.89 | ATM    | N1983S    | MISSENSE | NON_SYNON'N   |                            |
| AA1222     | chr11 | 108183167 | rs659243    | A          | G          | 99.92            | 99.93 | ATM    | N1983S    | MISSENSE | NON_SYNON'N   |                            |
| AA1247     | chr11 | 108183167 | rs659243    | A          | G          | 99.89            | 100   | ATM    | N1983S    | MISSENSE | NON_SYNON'N   |                            |
| AA1267     | chr11 | 108183167 | rs659243    | A          | G          | 99.61            | 100   | ATM    | N1983S    | MISSENSE | NON_SYNON'N   |                            |
| AA1277     | chr11 | 108183167 | rs659243    | A          | G          | 99.64            | 99.63 | ATM    | N1983S    | MISSENSE | NON_SYNON'N   |                            |
| AA1307     | chr11 | 108183167 | rs659243    | A          | G          | 100              | 99.83 | ATM    | N1983S    | MISSENSE | NON_SYNON'N   |                            |
| AA957      | chr11 | 108183167 | rs659243    | A          | G          | 99.8             | 99.68 | ATM    | N1983S    | MISSENSE | NON_SYNON'N   |                            |
| AA926      | chr11 | 108175462 | rs1801516   | G          | A          | 50.13            | 44.73 | ATM    | D1853N    | MISSENSE | NON_SYNON'P   |                            |
| AA926      | chr11 | 108183167 | rs659243    | A          | G          | 99.81            | 99.76 | ATM    | N1983S    | MISSENSE | NON_SYNON'N   |                            |
| AA930      | chr11 | 108183167 | rs659243    | A          | G          | 100              | 99.95 | ATM    | N1983S    | MISSENSE | NON_SYNON'N   |                            |
| AA1106     | chr11 | 108175462 | rs1801516   | G          | A          | 40.38            | 22.21 | ATM    | D1853N    | MISSENSE | NON_SYNON'P   |                            |
| AA1106     | chr11 | 108183167 | rs659243    | A          | G          | 99.72            | 99.74 | ATM    | N1983S    | MISSENSE | NON_SYNON'N   |                            |
| AA948      | chr11 | 108175462 | rs1801516   | G          | A          | 52.64            | 47.82 | ATM    | D1853N    | MISSENSE | NON_SYNON'P   |                            |
| AA948      | chr11 | 108183167 | rs659243    | A          | G          | 100              | 100   | ATM    | N1983S    | MISSENSE | NON_SYNON'N   |                            |
| AA952      | chr11 | 108183167 | rs659243    | A          | G          | 99.81            | 99.93 | ATM    | N1983S    | MISSENSE | NON_SYNON'N   |                            |
| AA1367     | chr11 | 108168053 | rs55870064  | A          | G          | 49.69            | 55.14 | ATM    | N1650S    | MISSENSE | NON_SYNON'N   |                            |
| AA1367     | chr11 | 108183167 | rs659243    | A          | G          | 100              | 99.57 | ATM    | N1983S    | MISSENSE | NON_SYNON'N   |                            |
| AA960      | chr11 | 108183167 | rs659243    | A          | G          | 99.6             | 99.74 | ATM    | N1983S    | MISSENSE | NON_SYNON'N   |                            |
| AA1515     | chr11 | 108175462 | rs1801516   | G          | A          | 52.22            | 45.24 | ATM    | D1853N    | MISSENSE | NON_SYNON'P   |                            |
| AA1515     | chr11 | 108183167 | rs659243    | A          | G          | 99.89            | 100   | ATM    | N1983S    | MISSENSE | NON_SYNON'N   |                            |
| UCI1546879 | chr11 | 108183167 | rs659243    | A          | G          | 100              | 99.71 | ATM    | N1983S    | MISSENSE | NON_SYNON'N   |                            |
| UCI1689380 | chr11 | 108183167 | rs659243    | A          | G          | 99.77            | 99.93 | ATM    | N1983S    | MISSENSE | NON_SYNON'N   |                            |
| AA930      | chr11 | 108098576 | rs1800054   | C          | G          | 42.89            | 48.56 | ATM    | S49C      | MISSENSE | NON_SYNON'D   |                            |
| UCI1804937 | chr11 | 108183167 | rs659243    | A          | G          | 96.07            | 93.39 | ATM    | N1983S    | MISSENSE | NON_SYNON'N   |                            |
| UCI1821517 | chr11 | 108183167 | rs659243    | A          | G          | 98.41            | 98.02 | ATM    | N1983S    | MISSENSE | NON_SYNON'N   |                            |
| UCI1908503 | chr11 | 108183167 | rs659243    | A          | G          | 98.69            | 98.03 | ATM    | N1983S    | MISSENSE | NON_SYNON'N   |                            |
| UCI1951813 | chr11 | 108183167 | rs659243    | A          | G          | 95.41            | 93.59 | ATM    | N1983S    | MISSENSE | NON_SYNON'N   |                            |
| UCI2008866 | chr11 | 108175462 | rs1801516   | G          | A          | 47.07            | 63.17 | ATM    | D1853N    | MISSENSE | NON_SYNON'P   |                            |
| UCI2008866 | chr11 | 108183167 | rs659243    | A          | G          | 99.81            | 100   | ATM    | N1983S    | MISSENSE | NON_SYNON'N   |                            |
| UCI2076630 | chr11 | 108183167 | rs659243    | A          | G          | 100              | 99.88 | ATM    | N1983S    | MISSENSE | NON_SYNON'N   |                            |
| UCI2219330 | chr11 | 108175462 | rs1801516   | G          | A          | 48.28            | 47.62 | ATM    | D1853N    | MISSENSE | NON_SYNON'P   |                            |
| UCI2219330 | chr11 | 108183167 | rs659243    | A          | G          | 99.71            | 99.8  | ATM    | N1983S    | MISSENSE | NON_SYNON'N   |                            |
| UCI2219330 | chr11 | 108196896 | rs56008889  | C          | T          | 54.18            | 48.72 | ATM    | L2307F    | MISSENSE | NON_SYNON'N   |                            |
| UCI2224680 | chr11 | 108183167 | rs659243    | A          | G          | 100              | 99.94 | ATM    | N1983S    | MISSENSE | NON_SYNON'N   |                            |
| UCI2231576 | chr11 | 10819823  | rs56128736  | T          | C          | 56.88            | 45.68 | ATM    | V410A     | MISSENSE | NON_SYNON'N   |                            |
| UCI2231576 | chr11 | 108183167 | rs659243    | A          | G          | 100              | 100   | ATM    | N1983S    | MISSENSE | NON_SYNON'N   |                            |
| UCI2564879 | chr11 | 108183167 | rs659243    | A          | G          | 99.8             | 99.91 | ATM    | N1983S    | MISSENSE | NON_SYNON'N   |                            |
| UCI2649875 | chr11 | 108183167 | rs659243    | A          | G          | 97.93            | 97.95 | ATM    | N1983S    | MISSENSE | NON_SYNON'N   |                            |
| UCI3165498 | chr11 | 108183167 | rs659243    | A          | G          | 99.78            | 99.72 | ATM    | N1983S    | MISSENSE | NON_SYNON'N   |                            |
| UCI3564897 | chr11 | 108175462 | rs1801516   | G          | A          | 54.1             | 12.9  | ATM    | D1853N    | MISSENSE | NON_SYNON'P   |                            |
| UCI3564897 | chr11 | 108183167 | rs659243    | A          | G          | 99.82            | 99.83 | ATM    | N1983S    | MISSENSE | NON_SYNON'N   |                            |
| UCI4216548 | chr11 | 108183167 | rs659243    | A          | G          | 99.82            | 99.92 | ATM    | N1983S    | MISSENSE | NON_SYNON'N   |                            |
| UCI8965412 | chr11 | 108183167 | rs659243    | A          | G          | 99.92            | 100   | ATM    | N1983S    | MISSENSE | NON_SYNON'N   |                            |

Table S8: List of non-silent germline variants

| Sample     | Chr   | Cord      | rsID        | Ref Allele | Alt Allele | Allelic Fraction |       | Gene  | AA change | Type     | Effect        | Mutation Taster Prediction |
|------------|-------|-----------|-------------|------------|------------|------------------|-------|-------|-----------|----------|---------------|----------------------------|
|            |       |           |             |            |            | Normal           | Tumor |       |           |          |               |                            |
| AA1277     | chr11 | 108235879 | rs139379666 | C          | T          | 49.94            | 11.35 | ATM   | P2974L    | MISSENSE | NON_SYNON'D   |                            |
| UCI9135402 | chr11 | 108175462 | rs1801516   | G          | A          | 99.25            | 98.82 | ATM   | D1853N    | MISSENSE | NON_SYNON'P   |                            |
| UCI9135402 | chr11 | 108183167 | rs659243    | A          | G          | 98.66            | 98.15 | ATM   | N1983S    | MISSENSE | NON_SYNON'N   |                            |
| AA957      | chr7  | 117188715 | rs3034796   | T          | GAAAGC     | 15.61            | 12.61 | CFTR  | NA        | NONE     | FRAME_SHIF'NA |                            |
| AA943      | chr14 | 105243085 | .           | CT         | C          | 16.04            | 16.27 | AKT1  | NA        | NONE     | FRAME_SHIF'NA |                            |
| AA943      | chr17 | 41223094  | rs1799966   | T          | C          | 99.87            | 98.98 | BRCA1 | S1317G    | MISSENSE | NON_SYNON'P   |                            |
| AA943      | chr17 | 41244000  | rs16942     | T          | C          | 100              | 98.73 | BRCA1 | K1136R    | MISSENSE | NON_SYNON'P   |                            |
| AA943      | chr17 | 41244435  | rs16941     | T          | C          | 99.75            | 98.13 | BRCA1 | E1038G    | MISSENSE | NON_SYNON'P   |                            |
| AA943      | chr17 | 41244936  | rs799917    | G          | A          | 99.85            | 98.81 | BRCA1 | P575L     | MISSENSE | NON_SYNON'P   |                            |
| AA943      | chr17 | 41245471  | rs4986850   | C          | T          | 52.67            | 51.88 | BRCA1 | D397N     | MISSENSE | NON_SYNON'P   |                            |
| AA1188     | chr17 | 41243840  | rs28897687  | A          | C          | 47.55            | 48.74 | BRCA1 | N1189K    | MISSENSE | NON_SYNON'N   |                            |
| UCI1804937 | chr2  | 29451760  | .           | TCC        | T          | 16.25            | 13.62 | ALK   | NA        | NONE     | FRAME_SHIF'NA |                            |
| AA1204     | chr17 | 41223094  | rs1799966   | T          | C          | 53.4             | 27.2  | BRCA1 | S1317G    | MISSENSE | NON_SYNON'P   |                            |
| AA1204     | chr17 | 41244000  | rs16942     | T          | C          | 54.36            | 22.04 | BRCA1 | K1136R    | MISSENSE | NON_SYNON'P   |                            |
| AA1204     | chr17 | 41244435  | rs16941     | T          | C          | 46.83            | 27.07 | BRCA1 | E1038G    | MISSENSE | NON_SYNON'P   |                            |
| AA1204     | chr17 | 41244936  | rs799917    | G          | A          | 52.24            | 28.2  | BRCA1 | P575L     | MISSENSE | NON_SYNON'P   |                            |
| AA1222     | chr17 | 41223094  | rs1799966   | T          | C          | 49.16            | 70.16 | BRCA1 | S1317G    | MISSENSE | NON_SYNON'P   |                            |
| AA1222     | chr17 | 41244000  | rs16942     | T          | C          | 60.9             | 67.99 | BRCA1 | K1136R    | MISSENSE | NON_SYNON'P   |                            |
| AA1222     | chr17 | 41244435  | rs16941     | T          | C          | 55.42            | 66.88 | BRCA1 | E1038G    | MISSENSE | NON_SYNON'P   |                            |
| AA1222     | chr17 | 41244936  | rs799917    | G          | A          | 48.32            | 71.71 | BRCA1 | P575L     | MISSENSE | NON_SYNON'P   |                            |
| AA1247     | chr17 | 41223094  | rs1799966   | T          | C          | 49.28            | 17.48 | BRCA1 | S1317G    | MISSENSE | NON_SYNON'P   |                            |
| AA1247     | chr17 | 41244000  | rs16942     | T          | C          | 46.76            | 15.93 | BRCA1 | K1136R    | MISSENSE | NON_SYNON'P   |                            |
| AA1247     | chr17 | 41244435  | rs16941     | T          | C          | 48.71            | 18.46 | BRCA1 | E1038G    | MISSENSE | NON_SYNON'P   |                            |
| AA1247     | chr17 | 41244936  | rs799917    | G          | A          | 44.73            | 17.29 | BRCA1 | P575L     | MISSENSE | NON_SYNON'P   |                            |
| AA1267     | chr17 | 41223094  | rs1799966   | T          | C          | 48.75            | 50.75 | BRCA1 | S1317G    | MISSENSE | NON_SYNON'P   |                            |
| AA1267     | chr17 | 41244000  | rs16942     | T          | C          | 50.03            | 52.61 | BRCA1 | K1136R    | MISSENSE | NON_SYNON'P   |                            |
| AA1267     | chr17 | 41244435  | rs16941     | T          | C          | 52.95            | 50.17 | BRCA1 | E1038G    | MISSENSE | NON_SYNON'P   |                            |
| AA1267     | chr17 | 41244936  | rs799917    | G          | A          | 48.17            | 53.43 | BRCA1 | P575L     | MISSENSE | NON_SYNON'P   |                            |
| AA957      | chr17 | 41223094  | rs1799966   | T          | C          | 51.21            | 51.27 | BRCA1 | S1317G    | MISSENSE | NON_SYNON'P   |                            |
| AA957      | chr17 | 41244000  | rs16942     | T          | C          | 45.22            | 47.22 | BRCA1 | K1136R    | MISSENSE | NON_SYNON'P   |                            |
| AA957      | chr17 | 41244435  | rs16941     | T          | C          | 43.58            | 44.31 | BRCA1 | E1038G    | MISSENSE | NON_SYNON'P   |                            |
| AA957      | chr17 | 41244936  | rs799917    | G          | A          | 46.99            | 51.38 | BRCA1 | P575L     | MISSENSE | NON_SYNON'P   |                            |
| AA926      | chr17 | 41244936  | rs799917    | G          | A          | 48.11            | 51.95 | BRCA1 | P575L     | MISSENSE | NON_SYNON'P   |                            |
| AA930      | chr17 | 41223094  | rs1799966   | T          | C          | 54.35            | 51.38 | BRCA1 | S1317G    | MISSENSE | NON_SYNON'P   |                            |
| AA930      | chr17 | 41244000  | rs16942     | T          | C          | 54.2             | 52.49 | BRCA1 | K1136R    | MISSENSE | NON_SYNON'P   |                            |
| AA930      | chr17 | 41244435  | rs16941     | T          | C          | 46.78            | 51.74 | BRCA1 | E1038G    | MISSENSE | NON_SYNON'P   |                            |
| AA930      | chr17 | 41244936  | rs799917    | G          | A          | 42.81            | 52.41 | BRCA1 | P575L     | MISSENSE | NON_SYNON'P   |                            |
| AA1106     | chr17 | 41243509  | rs28897689  | T          | C          | 50.79            | 48.94 | BRCA1 | R1051G    | MISSENSE | NON_SYNON'N   |                            |
| AA948      | chr17 | 41244710  | .           | G          | C          | 47.33            | 45.26 | BRCA1 | I650M     | MISSENSE | NON_SYNON'N   |                            |
| AA952      | chr17 | 41246481  | rs1799950   | T          | C          | 46.18            | 49.73 | BRCA1 | Q309R     | MISSENSE | NON_SYNON'N   |                            |
| AA1515     | chr17 | 41219694  | rs80357087  | C          | A          | 51.47            | 52    | BRCA1 | A1373S    | MISSENSE | NON_SYNON'D   |                            |
| AA1367     | chr17 | 41244982  | rs80356892  | A          | G          | 45.23            | 70.69 | BRCA1 | Y560H     | MISSENSE | NON_SYNON'N   |                            |
| UCI1546879 | chr17 | 41222975  | rs1799967   | C          | T          | 51.31            | 60.25 | BRCA1 | M1356I    | MISSENSE | NON_SYNON'N   |                            |
| UCI1546879 | chr17 | 41223094  | rs1799966   | T          | C          | 99.62            | 99.47 | BRCA1 | S1317G    | MISSENSE | NON_SYNON'P   |                            |
| UCI1546879 | chr17 | 41244000  | rs16942     | T          | C          | 99.78            | 99.69 | BRCA1 | K1136R    | MISSENSE | NON_SYNON'P   |                            |
| UCI1546879 | chr17 | 41244435  | rs16941     | T          | C          | 99.56            | 99.35 | BRCA1 | E1038G    | MISSENSE | NON_SYNON'P   |                            |
| UCI1546879 | chr17 | 41244936  | rs799917    | G          | A          | 99.71            | 99.61 | BRCA1 | P575L     | MISSENSE | NON_SYNON'P   |                            |
| UCI1821517 | chr17 | 41223094  | rs1799966   | T          | C          | 98.58            | 98    | BRCA1 | S1317G    | MISSENSE | NON_SYNON'P   |                            |
| UCI1821517 | chr17 | 41244000  | rs16942     | T          | C          | 98.58            | 98.77 | BRCA1 | K1136R    | MISSENSE | NON_SYNON'P   |                            |
| UCI1821517 | chr17 | 41244435  | rs16941     | T          | C          | 99.24            | 98.88 | BRCA1 | E1038G    | MISSENSE | NON_SYNON'P   |                            |
| UCI1821517 | chr17 | 41244936  | rs799917    | G          | A          | 99.24            | 98.7  | BRCA1 | P575L     | MISSENSE | NON_SYNON'P   |                            |
| UCI1908503 | chr17 | 41244429  | rs4986852   | C          | T          | 50.63            | 46.93 | BRCA1 | S1040N    | MISSENSE | NON_SYNON'N   |                            |
| UCI2076630 | chr17 | 41223094  | rs1799966   | T          | C          | 99.46            | 99.35 | BRCA1 | S1317G    | MISSENSE | NON_SYNON'P   |                            |
| UCI2076630 | chr17 | 41244000  | rs16942     | T          | C          | 98.38            | 98.1  | BRCA1 | K1136R    | MISSENSE | NON_SYNON'P   |                            |
| UCI2076630 | chr17 | 41244435  | rs16941     | T          | C          | 99.6             | 98.88 | BRCA1 | E1038G    | MISSENSE | NON_SYNON'P   |                            |
| UCI2076630 | chr17 | 41244936  | rs799917    | G          | A          | 98.83            | 98.78 | BRCA1 | P575L     | MISSENSE | NON_SYNON'P   |                            |
| UCI2219330 | chr17 | 41246481  | rs1799950   | T          | C          | 49.02            | 49.12 | BRCA1 | Q309R     | MISSENSE | NON_SYNON'N   |                            |
| UCI2224680 | chr17 | 41223094  | rs1799966   | T          | C          | 46.06            | 74.04 | BRCA1 | S1317G    | MISSENSE | NON_SYNON'P   |                            |
| UCI2224680 | chr17 | 41244000  | rs16942     | T          | C          | 49.49            | 79.81 | BRCA1 | K1136R    | MISSENSE | NON_SYNON'P   |                            |
| UCI2224680 | chr17 | 41244435  | rs16941     | T          | C          | 47.7             | 72.07 | BRCA1 | E1038G    | MISSENSE | NON_SYNON'P   |                            |
| UCI2224680 | chr17 | 41244936  | rs799917    | G          | A          | 50.19            | 71.74 | BRCA1 | P575L     | MISSENSE | NON_SYNON'P   |                            |
| UCI2224680 | chr17 | 41245471  | rs4986850   | C          | T          | 42.86            | 73.57 | BRCA1 | D397N     | MISSENSE | NON_SYNON'P   |                            |
| UCI2231576 | chr17 | 41244252  | rs80357201  | G          | A          | 50.83            | 51.41 | BRCA1 | P1052L    | MISSENSE | NON_SYNON'N   |                            |
| UCI2564879 | chr17 | 41223094  | rs1799966   | T          | C          | 47.68            | 49.99 | BRCA1 | S1317G    | MISSENSE | NON_SYNON'P   |                            |
| UCI2564879 | chr17 | 41244000  | rs16942     | T          | C          | 55.6             | 53.77 | BRCA1 | K1136R    | MISSENSE | NON_SYNON'P   |                            |
| UCI2564879 | chr17 | 41244435  | rs16941     | T          | C          | 52.62            | 50.35 | BRCA1 | E1038G    | MISSENSE | NON_SYNON'P   |                            |
| UCI2564879 | chr17 | 41244936  | rs799917    | G          | A          | 49.52            | 52.51 | BRCA1 | P575L     | MISSENSE | NON_SYNON'P   |                            |
| UCI2649875 | chr17 | 41244936  | rs799917    | G          | A          | 49.09            | 53.03 | BRCA1 | P575L     | MISSENSE | NON_SYNON'P   |                            |
| UCI2649875 | chr17 | 41256956  | rs80357209  | G          | C          | 43.87            | 48.01 | BRCA1 | T30R      | MISSENSE | NON_SYNON'N   |                            |
| UCI9135402 | chr17 | 41223094  | rs1799966   | T          | C          | 47.08            | 50.99 | BRCA1 | S1317G    | MISSENSE | NON_SYNON'P   |                            |
| UCI9135402 | chr17 | 41244000  | rs16942     | T          | C          | 45.14            | 54.11 | BRCA1 | K1136R    | MISSENSE | NON_SYNON'P   |                            |
| UCI9135402 | chr17 | 41244435  | rs16941     | T          | C          | 53.65            | 49.5  | BRCA1 | E1038G    | MISSENSE | NON_SYNON'P   |                            |
| UCI9135402 | chr17 | 41244936  | rs799917    | G          | A          | 53.7             | 44.4  | BRCA1 | P575L     | MISSENSE | NON_SYNON'P   |                            |
| AA1025     | chr13 | 32914236  | rs4987117   | C          | T          | 56.52            | 33.93 | BRCA2 | T1915M    | MISSENSE | NON_SYNON'N   |                            |
| AA1025     | chr13 | 32929387  | rs169547    | T          | C          | 99.92            | 99.94 | BRCA2 | V2466A    | MISSENSE | NON_SYNON'N   |                            |
| AA1077     | chr13 | 32929387  | rs169547    | T          | C          | 99.86            | 100   | BRCA2 | V2466A    | MISSENSE | NON_SYNON'N   |                            |
| AA1090     | chr13 | 32912928  | rs80358678  | G          | C          | 51.36            | 47.54 | BRCA2 | S1479T    | MISSENSE | NON_SYNON'N   |                            |
| AA1090     | chr13 | 32929387  | rs169547    | T          | C          | 100              | 99.94 | BRCA2 | V2466A    | MISSENSE | NON_SYNON'N   |                            |
| AA943      | chr13 | 32929387  | rs169547    | T          | C          | 99.81            | 100   | BRCA2 | V2466A    | MISSENSE | NON_SYNON'N   |                            |
| AA1188     | chr13 | 32929387  | rs169547    | T          | C          | 99.74            | 99.66 | BRCA2 | V2466A    | MISSENSE | NON_SYNON'N   |                            |
| AA1204     | chr13 | 32929387  | rs169547    | T          | C          | 99.92            | 99.88 | BRCA2 | V2466A    | MISSENSE | NON_SYNON'N   |                            |
| AA1222     | chr13 | 32906729  | rs144848    | A          | C          | 57.57            | 80.48 | BRCA2 | N370H     | MISSENSE | NON_SYNON'P   |                            |
| AA1222     | chr13 | 32929387  | rs169547    | T          | C          | 99.78            | 99.48 | BRCA2 | V2466A    | MISSENSE | NON_SYNON'N   |                            |
| AA1247     | chr13 | 32929387  | rs169547    | T          | C          | 99.8             | 99.78 | BRCA2 | V2466A    | MISSENSE | NON_SYNON'N   |                            |
| AA1267     | chr13 | 32929387  | rs169547    | T          | C          | 99.81            | 100   | BRCA2 | V2466A    | MISSENSE | NON_SYNON'N   |                            |
| AA1277     | chr13 | 32910842  | rs11571653  | A          | G          | 45.82            | 67.44 | BRCA2 | M784V     | MISSENSE | NON_SYNON'N   |                            |
| AA1277     | chr13 | 32929387  | rs169547    | T          | C          | 99.35            | 100   | BRCA2 | V2466A    | MISSENSE | NON_SYNON'N   |                            |
| AA1307     | chr13 | 32929387  | rs169547    | T          | C          | 99.96            | 100   | BRCA2 | V2466A    | MISSENSE | NON_SYNON'N   |                            |
| AA957      | chr13 | 32929387  | rs169547    | T          | C          | 99.96            | 100   | BRCA2 | V2466A    | MISSENSE | NON_SYNON'N   |                            |
| AA926      | chr13 | 32914236  | rs4987117   | C          | T          | 50               | 62.88 | BRCA2 | T1915M    | MISSENSE | NON_SYNON'N   |                            |
| AA926      | chr13 | 32929387  | rs169547    | T          | C          | 100              | 100   | BRCA2 | V2466A    | MISSENSE | NON_SYNON'N   |                            |
| AA930      | chr13 | 32906729  | rs144848    | A          | C          | 48.09            | 52.48 | BRCA2 | N370H     | MISSENSE | NON_SYNON'P   |                            |
| AA930      | chr13 | 32929387  | rs169547    | T          | C          | 99.74            | 99.88 | BRCA2 | V2466A    | MISSENSE | NON_SYNON'N   |                            |
| AA1106     | chr13 | 32914592  | rs1799954   | C          | T          | 51.79            | 46.64 | BRCA2 | R2034C    | MISSENSE | NON_SYNON'N   |                            |
| AA1106     | chr13 | 32929387  | rs169547    | T          | C          | 99.6             | 99.85 | BRCA2 | V2466A    | MISSENSE | NON_SYNON'N   |                            |
| AA948      | chr13 | 32906729  | rs144848    | A          | C          | 46.76            | 50.25 | BRCA2 | N370H     | MISSENSE | NON_SYNON'P   |                            |
| AA948      | chr13 | 32914947  | rs80358881  | C          | A          | 48.15            | 46.74 | BRCA2 | S2152Y    | MISSENSE | NON_SYNON'N   |                            |
| AA948      | chr13 | 32929387  | rs169547    | T          | C          | 100              | 100   | BRCA2 | V2466A    | MISSENSE | NON_SYNON'N   |                            |
| AA952      | chr13 | 32906729  | rs144848    | A          | C          | 99.85            | 99.41 | BRCA2 | N370H     | MISSENSE | NON_SYNON'P   |                            |
| AA952      | chr13 | 32929387  | rs169547    | T          | C          | 99.83            | 99.87 | BRCA2 | V2466A    | MISSENSE | NON_SYNON'N   |                            |

Table S8: List of non-silent germline variants

| Sample     | Chr   | Cord      | rsID        | Ref Allele | Alt Allele | Allelic Fraction |       | Gene   | AA change | Type     | Effect         | Mutation Taster Prediction |
|------------|-------|-----------|-------------|------------|------------|------------------|-------|--------|-----------|----------|----------------|----------------------------|
|            |       |           |             |            |            | Normal           | Tumor |        |           |          |                |                            |
| AA1367     | chr13 | 32906729  | rs144848    | A          | C          | 50.73            | 70.94 | BRCA2  | N370H     | MISSENSE | NON_SYNONYM_P  |                            |
| AA1367     | chr13 | 32929387  | rs169547    | T          | C          | 99.93            | 99.9  | BRCA2  | V2466A    | MISSENSE | NON_SYNONYM_N  |                            |
| AA960      | chr13 | 32906729  | rs144848    | A          | C          | 48.67            | 49.6  | BRCA2  | N370H     | MISSENSE | NON_SYNONYM_P  |                            |
| AA960      | chr13 | 32914236  | rs4987117   | C          | T          | 46.43            | 45.87 | BRCA2  | T1915M    | MISSENSE | NON_SYNONYM_N  |                            |
| AA960      | chr13 | 32929387  | rs169547    | T          | C          | 99.49            | 99.86 | BRCA2  | V2466A    | MISSENSE | NON_SYNONYM_N  |                            |
| AA960      | chr13 | 32930598  | rs11571707  | T          | C          | 46.28            | 53.85 | BRCA2  | I2490T    | MISSENSE | NON_SYNONYM_N  |                            |
| AA1515     | chr13 | 32906480  | rs766173    | A          | C          | 59.11            | 50.69 | BRCA2  | N287H     | MISSENSE | NON_SYNONYM_N  |                            |
| AA1515     | chr13 | 32911463  | rs1799944   | A          | G          | 50.89            | 53.88 | BRCA2  | N991D     | MISSENSE | NON_SYNONYM_P  |                            |
| AA1515     | chr13 | 32929387  | rs169547    | T          | C          | 99.91            | 99.85 | BRCA2  | V2466A    | MISSENSE | NON_SYNONYM_N  |                            |
| UCI1546879 | chr13 | 32906729  | rs144848    | A          | C          | 44.8             | 31.14 | BRCA2  | N370H     | MISSENSE | NON_SYNONYM_P  |                            |
| UCI1546879 | chr13 | 32929387  | rs169547    | T          | C          | 99.58            | 100   | BRCA2  | V2466A    | MISSENSE | NON_SYNONYM_N  |                            |
| UCI1689380 | chr13 | 32906729  | rs144848    | A          | C          | 41.44            | 61.95 | BRCA2  | N370H     | MISSENSE | NON_SYNONYM_P  |                            |
| UCI1689380 | chr13 | 32929387  | rs169547    | T          | C          | 99.42            | 99.72 | BRCA2  | V2466A    | MISSENSE | NON_SYNONYM_N  |                            |
| UCI1804937 | chr13 | 32929387  | rs169547    | T          | C          | 99.68            | 99.78 | BRCA2  | V2466A    | MISSENSE | NON_SYNONYM_N  |                            |
| UCI1821517 | chr13 | 32929387  | rs169547    | T          | C          | 99.62            | 99.63 | BRCA2  | V2466A    | MISSENSE | NON_SYNONYM_N  |                            |
| UCI1908503 | chr13 | 32929387  | rs169547    | T          | C          | 99.49            | 99.55 | BRCA2  | V2466A    | MISSENSE | NON_SYNONYM_N  |                            |
| UCI1951813 | chr13 | 32906729  | rs144848    | A          | C          | 99.59            | 99.75 | BRCA2  | N370H     | MISSENSE | NON_SYNONYM_P  |                            |
| UCI1951813 | chr13 | 32929387  | rs169547    | T          | C          | 99.77            | 99.72 | BRCA2  | V2466A    | MISSENSE | NON_SYNONYM_N  |                            |
| UCI2008866 | chr13 | 32906729  | rs144848    | A          | C          | 54.32            | 10.51 | BRCA2  | N370H     | MISSENSE | NON_SYNONYM_P  |                            |
| UCI2008866 | chr13 | 32929387  | rs169547    | T          | C          | 99.93            | 99.82 | BRCA2  | V2466A    | MISSENSE | NON_SYNONYM_N  |                            |
| UCI2076630 | chr13 | 32929387  | rs169547    | T          | C          | 100              | 99.69 | BRCA2  | V2466A    | MISSENSE | NON_SYNONYM_N  |                            |
| UCI2219330 | chr13 | 32906729  | rs144848    | A          | C          | 99.56            | 99.62 | BRCA2  | N370H     | MISSENSE | NON_SYNONYM_P  |                            |
| UCI2219330 | chr13 | 32929387  | rs169547    | T          | C          | 99.79            | 99.91 | BRCA2  | V2466A    | MISSENSE | NON_SYNONYM_N  |                            |
| UCI2224680 | chr13 | 32929387  | rs169547    | T          | C          | 99.76            | 99.52 | BRCA2  | V2466A    | MISSENSE | NON_SYNONYM_N  |                            |
| UCI2224680 | chr13 | 32972884  | rs1801426   | A          | G          | 53.2             | 34.16 | BRCA2  | I3412V    | MISSENSE | NON_SYNONYM_P  |                            |
| UCI2231576 | chr13 | 32906480  | rs766173    | A          | C          | 55.74            | 47.48 | BRCA2  | N287H     | MISSENSE | NON_SYNONYM_N  |                            |
| UCI2231576 | chr13 | 32911463  | rs1799944   | A          | G          | 52.76            | 54.43 | BRCA2  | N991D     | MISSENSE | NON_SYNONYM_P  |                            |
| UCI2231576 | chr13 | 32929387  | rs169547    | T          | C          | 99.65            | 99.91 | BRCA2  | V2466A    | MISSENSE | NON_SYNONYM_N  |                            |
| UCI2564879 | chr13 | 32929387  | rs169547    | T          | C          | 100              | 100   | BRCA2  | V2466A    | MISSENSE | NON_SYNONYM_N  |                            |
| UCI2649875 | chr13 | 32929387  | rs169547    | T          | C          | 99.31            | 99.67 | BRCA2  | V2466A    | MISSENSE | NON_SYNONYM_N  |                            |
| UCI3165498 | chr13 | 32929387  | rs169547    | T          | C          | 99.88            | 99.85 | BRCA2  | V2466A    | MISSENSE | NON_SYNONYM_N  |                            |
| UCI3564897 | chr13 | 32906480  | rs766173    | A          | C          | 53.57            | 53.7  | BRCA2  | N287H     | MISSENSE | NON_SYNONYM_N  |                            |
| UCI3564897 | chr13 | 32906729  | rs144848    | A          | C          | 52.27            | 49.3  | BRCA2  | N370H     | MISSENSE | NON_SYNONYM_P  |                            |
| UCI3564897 | chr13 | 32911463  | rs1799944   | A          | G          | 51.3             | 48.31 | BRCA2  | N991D     | MISSENSE | NON_SYNONYM_P  |                            |
| UCI3564897 | chr13 | 32929387  | rs169547    | T          | C          | 99.9             | 100   | BRCA2  | V2466A    | MISSENSE | NON_SYNONYM_N  |                            |
| UCI4216548 | chr13 | 32929387  | rs169547    | T          | C          | 99.72            | 99.72 | BRCA2  | V2466A    | MISSENSE | NON_SYNONYM_N  |                            |
| UCI8965412 | chr13 | 32929387  | rs169547    | T          | C          | 63               | 71.34 | BRCA2  | V2466A    | MISSENSE | NON_SYNONYM_N  |                            |
| UCI2008866 | chr13 | 32972626  | rs11571833  | A          | T          | 45.99            | 12.16 | BRCA2  | K3326*    | NONSENSE | STOP_GAINED    |                            |
| UCI9135402 | chr13 | 32906729  | rs144848    | A          | C          | 51.08            | 51.13 | BRCA2  | N370H     | MISSENSE | NON_SYNONYM_P  |                            |
| UCI9135402 | chr13 | 32929387  | rs169547    | T          | C          | 99.24            | 99.58 | BRCA2  | V2466A    | MISSENSE | NON_SYNONYM_N  |                            |
| AA1247     | chr16 | 68855966  | rs35187787  | G          | A          | 54.15            | 59.36 | CDH1   | A531T     | MISSENSE | NON_SYNONYM_N  |                            |
| UCI165498  | chr16 | 68842734  | .           | C          | T          | 45.15            | 37.66 | CDH1   | R224C     | MISSENSE | NON_SYNONYM_N  |                            |
| UCI2224680 | chr9  | 21970916  | rs3731249   | C          | T          | 52.5             | 51.15 | CDKN2A | A148T     | MISSENSE | NON_SYNONYM_N  |                            |
| AA1025     | chr7  | 117199533 | rs213950    | G          | A          | 99.32            | 99.33 | CFTR   | V409M     | MISSENSE | NON_SYNONYM_P  |                            |
| AA1025     | chr7  | 117227832 | rs113993959 | G          | T          | 50.84            | 55.83 | CFTR   | G481*     | NONSENSE | STOP_GAINED    |                            |
| AA1077     | chr7  | 117199533 | rs213950    | G          | A          | 44.47            | 81.3  | CFTR   | V409M     | MISSENSE | NON_SYNONYM_P  |                            |
| AA1090     | chr7  | 117199533 | rs213950    | G          | A          | 49.29            | 9.52  | CFTR   | V409M     | MISSENSE | NON_SYNONYM_P  |                            |
| AA943      | chr7  | 117199533 | rs213950    | G          | A          | 53.95            | 45.71 | CFTR   | V409M     | MISSENSE | NON_SYNONYM_P  |                            |
| AA1188     | chr7  | 117199533 | rs213950    | G          | A          | 49.63            | 45.96 | CFTR   | V409M     | MISSENSE | NON_SYNONYM_P  |                            |
| AA1204     | chr7  | 117199533 | rs213950    | G          | A          | 50.51            | 59.27 | CFTR   | V409M     | MISSENSE | NON_SYNONYM_P  |                            |
| AA1222     | chr7  | 117199533 | rs213950    | G          | A          | 53.5             | 50.22 | CFTR   | V409M     | MISSENSE | NON_SYNONYM_P  |                            |
| AA1247     | chr7  | 117199533 | rs213950    | G          | A          | 99.94            | 99.1  | CFTR   | V409M     | MISSENSE | NON_SYNONYM_P  |                            |
| UCI1821517 | chr7  | 117182116 | rs143860237 | C          | T          | 54.27            | 79.84 | CFTR   | T358M     | MISSENSE | NON_SYNONYM_D  |                            |
| AA1204     | chr7  | 117267812 | rs34911792  | T          | G          | 47.92            | 60.22 | CFTR   | S1174R    | MISSENSE | NON_SYNONYM_D  |                            |
| AA930      | chr7  | 117199533 | rs213950    | G          | A          | 55.13            | 48.58 | CFTR   | V409M     | MISSENSE | NON_SYNONYM_P  |                            |
| UCI2224680 | chr7  | 117267812 | rs34911792  | T          | G          | 58.03            | 50.95 | CFTR   | S1174R    | MISSENSE | NON_SYNONYM_D  |                            |
| AA1367     | chr7  | 117199533 | rs213950    | G          | A          | 52.05            | 47.22 | CFTR   | V409M     | MISSENSE | NON_SYNONYM_P  |                            |
| AA960      | chr7  | 117199533 | rs213950    | G          | A          | 47.27            | 47.84 | CFTR   | V409M     | MISSENSE | NON_SYNONYM_P  |                            |
| UCI1546879 | chr7  | 117199533 | rs213950    | G          | A          | 54.22            | 42.18 | CFTR   | V409M     | MISSENSE | NON_SYNONYM_P  |                            |
| UCI9135402 | chr7  | 117175323 | rs138338446 | G          | A          | 50.05            | 49.49 | CFTR   | V171M     | MISSENSE | NON_SYNONYM_D  |                            |
| UCI1689380 | chr7  | 117199533 | rs213950    | G          | A          | 57.08            | 34.56 | CFTR   | V409M     | MISSENSE | NON_SYNONYM_P  |                            |
| UCI1804937 | chr7  | 117199533 | rs213950    | G          | A          | 46.94            | 46.81 | CFTR   | V409M     | MISSENSE | NON_SYNONYM_P  |                            |
| UCI9135402 | chr7  | 117282582 | rs11971167  | G          | A          | 45.16            | 47.4  | CFTR   | D1209N    | MISSENSE | NON_SYNONYM_D  |                            |
| UCI1821517 | chr7  | 117199533 | rs213950    | G          | A          | 44.39            | 76.49 | CFTR   | V409M     | MISSENSE | NON_SYNONYM_P  |                            |
| UCI1908503 | chr7  | 117199533 | rs213950    | G          | A          | 99.59            | 99.73 | CFTR   | V409M     | MISSENSE | NON_SYNONYM_P  |                            |
| UCI9135402 | chr7  | 117149143 | rs115545701 | C          | T          | 51.85            | 45.86 | CFTR   | R74W      | MISSENSE | NON_SYNONYM_D  |                            |
| UCI1951813 | chr7  | 117199533 | rs213950    | G          | A          | 39.17            | 44.43 | CFTR   | V409M     | MISSENSE | NON_SYNONYM_P  |                            |
| UCI2008866 | chr7  | 117199533 | rs213950    | G          | A          | 50.12            | 35.77 | CFTR   | V409M     | MISSENSE | NON_SYNONYM_P  |                            |
| UCI3564897 | chr7  | 117171122 | rs35516286  | T          | C          | 45.19            | 43.52 | CFTR   | I148T     | MISSENSE | NON_SYNONYM_D  |                            |
| UCI2076630 | chr7  | 117199533 | rs213950    | G          | A          | 55.72            | 21.12 | CFTR   | V409M     | MISSENSE | NON_SYNONYM_P  |                            |
| UCI1546879 | chr7  | 117267812 | rs34911792  | T          | G          | 47.89            | 42.15 | CFTR   | S1174R    | MISSENSE | NON_SYNONYM_D  |                            |
| UCI2219330 | chr7  | 117199533 | rs213950    | G          | A          | 48.79            | 54.26 | CFTR   | V409M     | MISSENSE | NON_SYNONYM_P  |                            |
| UCI2224680 | chr7  | 117199533 | rs213950    | G          | A          | 41.5             | 55.67 | CFTR   | V409M     | MISSENSE | NON_SYNONYM_P  |                            |
| AA926      | chr7  | 117149147 | rs1800076   | G          | A          | 44.33            | 37.99 | CFTR   | R75Q      | MISSENSE | NON_SYNONYM_D  |                            |
| UCI2231576 | chr7  | 117199533 | rs213950    | G          | A          | 55.08            | 49.57 | CFTR   | V409M     | MISSENSE | NON_SYNONYM_P  |                            |
| UCI2564879 | chr7  | 117199533 | rs213950    | G          | A          | 99.53            | 99.43 | CFTR   | V409M     | MISSENSE | NON_SYNONYM_P  |                            |
| UCI2649875 | chr7  | 117199533 | rs213950    | G          | A          | 99.87            | 99.63 | CFTR   | V409M     | MISSENSE | NON_SYNONYM_P  |                            |
| AA943      | chr7  | 140481383 | .           | CT         | C          | 16.89            | 16.78 | BRAF   | NA        | NONE     | FRAME_SHIFT_NA |                            |
| UCI1908503 | chr7  | 6018228   | .           | AT         | A          | 16.96            | 17.35 | PMS2   | NA        | NONE     | FRAME_SHIFT_NA |                            |
| UCI3165498 | chr7  | 117199533 | rs213950    | G          | A          | 55.95            | 49.08 | CFTR   | V409M     | MISSENSE | NON_SYNONYM_P  |                            |
| UCI3564897 | chr7  | 117199533 | rs213950    | G          | A          | 45.85            | 45.91 | CFTR   | V409M     | MISSENSE | NON_SYNONYM_P  |                            |
| UCI1951813 | chr5  | 149500767 | .           | GT         | G          | 17.33            | 18.31 | PDGFRB | NA        | NONE     | FRAME_SHIFT_NA |                            |
| UCI1908503 | chr9  | 139391529 | .           | GA         | G          | 17.34            | 18.78 | NOTCH1 | NA        | NONE     | FRAME_SHIFT_NA |                            |
| UCI1821517 | chr7  | 6018228   | .           | AT         | A          | 17.47            | 17.88 | PMS2   | NA        | NONE     | FRAME_SHIFT_NA |                            |
| AA943      | chr7  | 117188715 | rs3034796   | GAAAGC     | G          | 18.03            | 19.82 | CFTR   | NA        | NONE     | FRAME_SHIFT_NA |                            |
| AA1277     | chr7  | 117188715 | rs3034796   | GAAAGC     | G          | 18.34            | 13.2  | CFTR   | NA        | NONE     | FRAME_SHIFT_NA |                            |
| AA1025     | chr7  | 117188715 | rs3034796   | GAAAGC     | G          | 18.54            | 15    | CFTR   | NA        | NONE     | FRAME_SHIFT_NA |                            |
| UCI2224680 | chr7  | 117188715 | rs3034796   | GAAAGC     | G          | 18.72            | 17.4  | CFTR   | NA        | NONE     | FRAME_SHIFT_NA |                            |
| UCI1951813 | chr9  | 139390569 | .           | GT         | G          | 19.17            | 17.98 | NOTCH1 | NA        | NONE     | FRAME_SHIFT_NA |                            |
| AA1367     | chr9  | 139390569 | .           | GT         | G          | 19.93            | 17.48 | NOTCH1 | NA        | NONE     | FRAME_SHIFT_NA |                            |
| UCI1804937 | chr3  | 37090032  | .           | CT         | C          | 20.3             | 19.94 | MLH1   | NA        | NONE     | FRAME_SHIFT_NA |                            |
| UCI9135402 | chr7  | 117199533 | rs213950    | G          | A          | 54.77            | 50.16 | CFTR   | V409M     | MISSENSE | NON_SYNONYM_P  |                            |
| AA960      | chr22 | 29121087  | rs17879961  | A          | G          | 46.53            | 62.59 | CHEK2  | I157T     | MISSENSE | NON_SYNONYM_N  |                            |
| UCI2649875 | chr22 | 29121087  | rs17879961  | A          | G          | 57.08            | 49.87 | CHEK2  | I157T     | MISSENSE | NON_SYNONYM_N  |                            |
| UCI2076630 | chr22 | 29126440  | .           | A          | G          | 59.77            | 43.31 | CHEK2  | V139A     | MISSENSE | NON_SYNONYM_NA |                            |
| AA960      | chr5  | 138160248 | rs150893072 | G          | C          | 47.84            | 28.08 | CTNNA1 | Q103H     | MISSENSE | NON_SYNONYM_D  |                            |
| AA1077     | chr10 | 96702066  | rs7900194   | G          | A          | 46.19            | 24.91 | CYP2C9 | R150H     | MISSENSE | NON_SYNONYM_N  |                            |
| UCI3564897 | chr10 | 96702047  | rs1799853   | C          | T          | 53.16            | 81.91 | CYP2C9 | R144C     | MISSENSE | NON_SYNONYM_D  |                            |
| UCI2649875 | chr10 | 96702047  | rs1799853   | C          | T          | 43.89            | 61.77 | CYP2C9 | R144C     | MISSENSE | NON_SYNONYM_D  |                            |
| AA1307     | chr10 | 96741053  | rs1057910   | A          | C          | 45.58            | 51.45 | CYP2C9 | I359L     | MISSENSE | NON_SYNONYM_D  |                            |

Table S8: List of non-silent germline variants

| Sample     | Chr   | Cord      | rsID        | Ref Allele | Alt Allele | Allelic Fraction |       | Gene   | AA change | Type     | Effect                | Mutation Taster Prediction |
|------------|-------|-----------|-------------|------------|------------|------------------|-------|--------|-----------|----------|-----------------------|----------------------------|
|            |       |           |             |            |            | Normal           | Tumor |        |           |          |                       |                            |
| AA948      | chr10 | 96748777  | rs9332239   | C          | T          | 48.21            | 51.16 | CYP2C9 | P489S     | MISSENSE | NON_SYNONYM           | D                          |
| UCI2219330 | chr10 | 96741053  | rs1057910   | A          | C          | 46.05            | 50.95 | CYP2C9 | I359L     | MISSENSE | NON_SYNONYM           | D                          |
| AA948      | chr10 | 96702047  | rs1799853   | C          | T          | 55.15            | 50.79 | CYP2C9 | R144C     | MISSENSE | NON_SYNONYM           | D                          |
| AA1515     | chr10 | 96702047  | rs1799853   | C          | T          | 52.95            | 50.26 | CYP2C9 | R144C     | MISSENSE | NON_SYNONYM           | D                          |
| UCI1689380 | chr10 | 96741053  | rs1057910   | A          | C          | 49.72            | 49.81 | CYP2C9 | I359L     | MISSENSE | NON_SYNONYM           | D                          |
| AA926      | chr10 | 96702047  | rs1799853   | C          | T          | 47.71            | 49.78 | CYP2C9 | R144C     | MISSENSE | NON_SYNONYM           | D                          |
| UCI1689380 | chr10 | 96702047  | rs1799853   | C          | T          | 54.96            | 49.46 | CYP2C9 | R144C     | MISSENSE | NON_SYNONYM           | D                          |
| AA1267     | chr10 | 96702047  | rs1799853   | C          | T          | 51.72            | 47.7  | CYP2C9 | R144C     | MISSENSE | NON_SYNONYM           | D                          |
| AA952      | chr10 | 96741053  | rs1057910   | A          | C          | 52.58            | 47.03 | CYP2C9 | I359L     | MISSENSE | NON_SYNONYM           | D                          |
| AA1025     | chr10 | 96702047  | rs1799853   | C          | T          | 48.83            | 45.36 | CYP2C9 | R144C     | MISSENSE | NON_SYNONYM           | D                          |
| UCI8965412 | chr10 | 96740981  | rs28371685  | C          | T          | 49.46            | 72.69 | CYP2C9 | R335V     | MISSENSE | NON_SYNONYM           | P                          |
| AA1188     | chr22 | 42522613  | rs1135840   | G          | C          | 100              | 100   | CYP2D6 | T432S     | MISSENSE | NON_SYNONYM           | NA                         |
| UCI1821517 | chr22 | 42523943  | rs16947     | A          | G          | 99.89            | 100   | CYP2D6 | C242R     | MISSENSE | NON_SYNONYM           | NA                         |
| UCI2231576 | chr22 | 42522613  | rs1135840   | G          | C          | 97.63            | 100   | CYP2D6 | T432S     | MISSENSE | NON_SYNONYM           | NA                         |
| UCI9135402 | chr22 | 42523943  | rs16947     | A          | G          | 99.85            | 100   | CYP2D6 | C242R     | MISSENSE | NON_SYNONYM           | NA                         |
| UCI1951813 | chr22 | 42523943  | rs16947     | A          | G          | 99.36            | 99.94 | CYP2D6 | C242R     | MISSENSE | NON_SYNONYM           | NA                         |
| AA952      | chr22 | 42523943  | rs16947     | A          | G          | 99.51            | 99.93 | CYP2D6 | C242R     | MISSENSE | NON_SYNONYM           | NA                         |
| AA1188     | chr22 | 42523943  | rs16947     | A          | G          | 99.91            | 99.86 | CYP2D6 | C242R     | MISSENSE | NON_SYNONYM           | NA                         |
| AA1267     | chr22 | 42522613  | rs1135840   | G          | C          | 99.93            | 99.86 | CYP2D6 | T432S     | MISSENSE | NON_SYNONYM           | NA                         |
| UCI2231576 | chr22 | 42523943  | rs16947     | A          | G          | 99.02            | 99.81 | CYP2D6 | C242R     | MISSENSE | NON_SYNONYM           | NA                         |
| AA1090     | chr22 | 42523943  | rs16947     | A          | G          | 99.86            | 99.8  | CYP2D6 | C242R     | MISSENSE | NON_SYNONYM           | NA                         |
| UCI2564879 | chr22 | 42523943  | rs16947     | A          | G          | 99.66            | 99.79 | CYP2D6 | C242R     | MISSENSE | NON_SYNONYM           | NA                         |
| AA1106     | chr22 | 42523943  | rs16947     | A          | G          | 99.96            | 99.77 | CYP2D6 | C242R     | MISSENSE | NON_SYNONYM           | NA                         |
| AA1367     | chr22 | 42523943  | rs16947     | A          | G          | 99.84            | 99.77 | CYP2D6 | C242R     | MISSENSE | NON_SYNONYM           | NA                         |
| UCI1908503 | chr22 | 42523943  | rs16947     | A          | G          | 99.41            | 99.76 | CYP2D6 | C242R     | MISSENSE | NON_SYNONYM           | NA                         |
| AA1025     | chr22 | 42523943  | rs16947     | A          | G          | 99.72            | 99.72 | CYP2D6 | C242R     | MISSENSE | NON_SYNONYM           | NA                         |
| UCI2649875 | chr22 | 42522613  | rs1135840   | G          | C          | 99.2             | 99.68 | CYP2D6 | T432S     | MISSENSE | NON_SYNONYM           | NA                         |
| AA1267     | chr22 | 42523943  | rs16947     | A          | G          | 99.87            | 99.63 | CYP2D6 | C242R     | MISSENSE | NON_SYNONYM           | NA                         |
| UCI2008866 | chr22 | 42523943  | rs16947     | A          | G          | 99.89            | 99.57 | CYP2D6 | C242R     | MISSENSE | NON_SYNONYM           | NA                         |
| UCI3165498 | chr22 | 42523943  | rs16947     | A          | G          | 99.53            | 99.54 | CYP2D6 | C242R     | MISSENSE | NON_SYNONYM           | NA                         |
| AA960      | chr22 | 42523943  | rs16947     | A          | G          | 99.84            | 99.4  | CYP2D6 | C242R     | MISSENSE | NON_SYNONYM           | NA                         |
| UCI2649875 | chr22 | 42523943  | rs16947     | A          | G          | 99.21            | 99.39 | CYP2D6 | C242R     | MISSENSE | NON_SYNONYM           | NA                         |
| UCI2564879 | chr22 | 42526694  | rs1065852   | G          | A          | 99.55            | 99.36 | CYP2D6 | P34S      | MISSENSE | NON_SYNONYM           | NA                         |
| AA1247     | chr22 | 42523943  | rs16947     | A          | G          | 99.59            | 99.35 | CYP2D6 | C242R     | MISSENSE | NON_SYNONYM           | NA                         |
| AA1204     | chr22 | 42523943  | rs16947     | A          | G          | 99.59            | 99.28 | CYP2D6 | C242R     | MISSENSE | NON_SYNONYM           | NA                         |
| UCI3165498 | chr22 | 42522613  | rs1135840   | G          | C          | 99.59            | 99.27 | CYP2D6 | T432S     | MISSENSE | NON_SYNONYM           | NA                         |
| AA1106     | chr22 | 42522613  | rs1135840   | G          | C          | 99.73            | 98.95 | CYP2D6 | T432S     | MISSENSE | NON_SYNONYM           | NA                         |
| AA1515     | chr22 | 42522613  | rs1135840   | G          | C          | 91.42            | 94.89 | CYP2D6 | T432S     | MISSENSE | NON_SYNONYM           | NA                         |
| UCI9135402 | chr22 | 42526694  | rs1065852   | G          | A          | 95.62            | 94.83 | CYP2D6 | P34S      | MISSENSE | NON_SYNONYM           | NA                         |
| UCI2008866 | chr22 | 42526694  | rs1065852   | G          | A          | 68.22            | 93.02 | CYP2D6 | P34S      | MISSENSE | NON_SYNONYM           | NA                         |
| UCI1689380 | chr22 | 42523943  | rs16947     | A          | G          | 46.82            | 92.63 | CYP2D6 | C242R     | MISSENSE | NON_SYNONYM           | NA                         |
| UCI1689380 | chr22 | 42522613  | rs1135840   | G          | C          | 50.25            | 90.03 | CYP2D6 | T432S     | MISSENSE | NON_SYNONYM           | NA                         |
| UCI3165498 | chr22 | 42526712  | rs138100349 | G          | A          | 47.01            | 88.58 | CYP2D6 | R28C      | MISSENSE | NON_SYNONYMOUS_CODING |                            |
| UCI1821517 | chr22 | 42526694  | rs1065852   | G          | A          | 60.65            | 85.04 | CYP2D6 | P34S      | MISSENSE | NON_SYNONYM           | NA                         |
| AA1090     | chr22 | 42522613  | rs1135840   | G          | C          | 53.3             | 84.61 | CYP2D6 | T432S     | MISSENSE | NON_SYNONYM           | NA                         |
| AA1367     | chr22 | 42526694  | rs1065852   | G          | A          | 64.72            | 75.39 | CYP2D6 | P34S      | MISSENSE | NON_SYNONYM           | NA                         |
| AA1247     | chr22 | 42526694  | rs1065852   | G          | A          | 64.51            | 73.07 | CYP2D6 | P34S      | MISSENSE | NON_SYNONYM           | NA                         |
| UCI1951813 | chr22 | 42526694  | rs1065852   | G          | A          | 63.7             | 67.61 | CYP2D6 | P34S      | MISSENSE | NON_SYNONYM           | NA                         |
| UCI2008866 | chr22 | 42523528  | rs1058172   | C          | T          | 50.33            | 64.96 | CYP2D6 | R311H     | MISSENSE | NON_SYNONYM           | NA                         |
| AA1025     | chr22 | 42526694  | rs1065852   | G          | A          | 48.1             | 63.65 | CYP2D6 | P34S      | MISSENSE | NON_SYNONYM           | NA                         |
| UCI1908503 | chr22 | 42522613  | rs1135840   | G          | C          | 51.17            | 61.43 | CYP2D6 | T432S     | MISSENSE | NON_SYNONYM           | NA                         |
| UCI9135402 | chr22 | 42523528  | rs1058172   | C          | T          | 64.95            | 60.28 | CYP2D6 | R311H     | MISSENSE | NON_SYNONYM           | NA                         |
| AA926      | chr22 | 42523943  | rs16947     | A          | G          | 52.72            | 59.91 | CYP2D6 | C242R     | MISSENSE | NON_SYNONYM           | NA                         |
| UCI1821517 | chr22 | 42523528  | rs1058172   | C          | T          | 56.49            | 59.07 | CYP2D6 | R311H     | MISSENSE | NON_SYNONYM           | NA                         |
| AA926      | chr22 | 42526694  | rs1065852   | G          | A          | 50.36            | 58.85 | CYP2D6 | P34S      | MISSENSE | NON_SYNONYM           | NA                         |
| UCI1804937 | chr22 | 42522613  | rs1135840   | G          | C          | 54.98            | 55.44 | CYP2D6 | T432S     | MISSENSE | NON_SYNONYM           | NA                         |
| AA960      | chr22 | 42522613  | rs1135840   | G          | C          | 44.94            | 55.2  | CYP2D6 | T432S     | MISSENSE | NON_SYNONYM           | NA                         |
| UCI1804937 | chr22 | 42523943  | rs16947     | A          | G          | 48.75            | 55.15 | CYP2D6 | C242R     | MISSENSE | NON_SYNONYM           | NA                         |
| UCI2219330 | chr22 | 42523943  | rs16947     | A          | G          | 47.83            | 54.82 | CYP2D6 | C242R     | MISSENSE | NON_SYNONYM           | NA                         |
| AA948      | chr22 | 42522613  | rs1135840   | G          | C          | 46.24            | 54.58 | CYP2D6 | T432S     | MISSENSE | NON_SYNONYM           | NA                         |
| AA1515     | chr22 | 42523943  | rs16947     | A          | G          | 49.61            | 54.12 | CYP2D6 | C242R     | MISSENSE | NON_SYNONYM           | NA                         |
| AA1204     | chr22 | 42522613  | rs1135840   | G          | C          | 49.38            | 53.99 | CYP2D6 | T432S     | MISSENSE | NON_SYNONYM           | NA                         |
| UCI1908503 | chr22 | 42526694  | rs1065852   | G          | A          | 64.81            | 52.97 | CYP2D6 | P34S      | MISSENSE | NON_SYNONYM           | NA                         |
| AA952      | chr22 | 42522613  | rs1135840   | G          | C          | 49.52            | 52.78 | CYP2D6 | T432S     | MISSENSE | NON_SYNONYM           | NA                         |
| AA1367     | chr9  | 139391529 | .           | GA         | G          | 20.96            | 21.41 | NOTCH1 | NA        | NONE     | FRAME_SHIFT           | NA                         |
| UCI2219330 | chr22 | 42522613  | rs1135840   | G          | C          | 51.69            | 50.76 | CYP2D6 | T432S     | MISSENSE | NON_SYNONYM           | NA                         |
| UCI1951813 | chr22 | 42523528  | rs1058172   | C          | T          | 48.49            | 50.34 | CYP2D6 | R311H     | MISSENSE | NON_SYNONYM           | NA                         |
| AA1307     | chr22 | 42523943  | rs16947     | A          | G          | 47.81            | 49.93 | CYP2D6 | C242R     | MISSENSE | NON_SYNONYM           | NA                         |
| AA1204     | chr22 | 42526694  | rs1065852   | G          | A          | 50.98            | 49.5  | CYP2D6 | P34S      | MISSENSE | NON_SYNONYM           | NA                         |
| AA957      | chr22 | 42523943  | rs16947     | A          | G          | 55.47            | 49.1  | CYP2D6 | C242R     | MISSENSE | NON_SYNONYM           | NA                         |
| AA943      | chr22 | 42523943  | rs16947     | A          | G          | 47.32            | 48.95 | CYP2D6 | C242R     | MISSENSE | NON_SYNONYM           | NA                         |
| AA952      | chr22 | 42526694  | rs1065852   | G          | A          | 48.47            | 48.9  | CYP2D6 | P34S      | MISSENSE | NON_SYNONYM           | NA                         |
| AA957      | chr22 | 42526694  | rs1065852   | G          | A          | 48.89            | 48.76 | CYP2D6 | P34S      | MISSENSE | NON_SYNONYM           | NA                         |
| UCI2649875 | chr7  | 116371802 | .           | TG         | T          | 21.12            | 21.01 | MET    | NA        | NONE     | FRAME_SHIFT           | NA                         |
| AA1307     | chr22 | 42522613  | rs1135840   | G          | C          | 44.56            | 48.16 | CYP2D6 | T432S     | MISSENSE | NON_SYNONYM           | NA                         |
| AA948      | chr22 | 42523943  | rs16947     | A          | G          | 49.13            | 48.08 | CYP2D6 | C242R     | MISSENSE | NON_SYNONYM           | NA                         |
| AA1077     | chr22 | 42526694  | rs1065852   | G          | A          | 51.19            | 47.85 | CYP2D6 | P34S      | MISSENSE | NON_SYNONYM           | NA                         |
| UCI1908503 | chr22 | 42523528  | rs1058172   | C          | T          | 47.83            | 47.85 | CYP2D6 | R311H     | MISSENSE | NON_SYNONYM           | NA                         |
| AA1247     | chr22 | 42523528  | rs1058172   | C          | T          | 50.24            | 47.84 | CYP2D6 | R311H     | MISSENSE | NON_SYNONYM           | NA                         |
| AA943      | chr22 | 42522613  | rs1135840   | G          | C          | 46.7             | 46.83 | CYP2D6 | T432S     | MISSENSE | NON_SYNONYM           | NA                         |
| AA1077     | chr22 | 42523943  | rs16947     | A          | G          | 50.18            | 46.7  | CYP2D6 | C242R     | MISSENSE | NON_SYNONYM           | NA                         |
| AA1222     | chr22 | 42523943  | rs16947     | A          | G          | 53.04            | 45.92 | CYP2D6 | C242R     | MISSENSE | NON_SYNONYM           | NA                         |
| UCI1951813 | chr22 | 42522613  | rs1135840   | G          | C          | 48.69            | 43.55 | CYP2D6 | T432S     | MISSENSE | NON_SYNONYM           | NA                         |
| UCI4216548 | chr22 | 42522613  | rs1135840   | G          | C          | 44.3             | 43.53 | CYP2D6 | T432S     | MISSENSE | NON_SYNONYM           | NA                         |
| AA1222     | chr22 | 42522613  | rs1135840   | G          | C          | 48.15            | 43.33 | CYP2D6 | T432S     | MISSENSE | NON_SYNONYM           | NA                         |
| UCI2076630 | chr22 | 42523943  | rs16947     | A          | G          | 46.39            | 43.05 | CYP2D6 | C242R     | MISSENSE | NON_SYNONYM           | NA                         |
| AA1025     | chr22 | 42523528  | rs1058172   | C          | T          | 32.27            | 42.14 | CYP2D6 | R311H     | MISSENSE | NON_SYNONYM           | NA                         |
| UCI2076630 | chr22 | 42522613  | rs1135840   | G          | C          | 58.98            | 41.69 | CYP2D6 | T432S     | MISSENSE | NON_SYNONYM           | NA                         |
| AA1247     | chr22 | 42522613  | rs1135840   | G          | C          | 49.4             | 41.33 | CYP2D6 | T432S     | MISSENSE | NON_SYNONYM           | NA                         |
| AA1367     | chr22 | 42522613  | rs1135840   | G          | C          | 50.73            | 40.72 | CYP2D6 | T432S     | MISSENSE | NON_SYNONYM           | NA                         |
| UCI4216548 | chr22 | 42523943  | rs16947     | A          | G          | 52.92            | 39.74 | CYP2D6 | C242R     | MISSENSE | NON_SYNONYM           | NA                         |
| AA948      | chr7  | 117188715 | rs3034796   | GAAAGC     | G          | 22.29            | 14.68 | CFTR   | NA        | NONE     | FRAME_SHIFT           | NA                         |
| AA960      | chr22 | 42526694  | rs1065852   | G          | A          | 50.98            | 35.29 | CYP2D6 | P34S      | MISSENSE | NON_SYNONYM           | NA                         |
| AA926      | chr22 | 42523528  | rs1058172   | C          | T          | 32.07            | 35.02 | CYP2D6 | R311H     | MISSENSE | NON_SYNONYM           | NA                         |
| AA957      | chr22 | 42523528  | rs1058172   | C          | T          | 31.75            | 34.62 | CYP2D6 | R311H     | MISSENSE | NON_SYNONYM           | NA                         |
| AA1025     | chr22 | 42522613  | rs1135840   | G          | C          | 42.71            | 34.35 | CYP2D6 | T432S     | MISSENSE | NON_SYNONYM           | NA                         |
| AA943      | chr22 | 42524817  | rs139779104 | C          | T          | 29.99            | 33.74 | CYP2D6 | G158E     | MISSENSE | NON_SYNONYM           | NA                         |
| AA1077     | chr22 | 42523528  | rs1058172   | C          | T          | 30.18            | 32.85 | CYP2D6 | R311H     | MISSENSE | NON_SYNONYM           | NA                         |
| UCI2224680 | chr22 | 42522613  | rs1135840   | G          | C          | 46.51            | 30.36 | CYP2D6 | T432S     | MISSENSE | NON_SYNONYM           | NA                         |
| UCI2224680 | chr22 | 42523943  | rs16947     | A          | G          | 50.52            | 29.59 | CYP2D6 | C242R     | MISSENSE | NON_SYNONYM           | NA                         |



Table S8: List of non-silent germline variants

| Sample     | Chr   | Cord      | rsID       | Ref Allele | Alt Allele | Allelic Fraction |       | Gene   | AA change | Type     | Effect               | Mutation Taster Prediction |
|------------|-------|-----------|------------|------------|------------|------------------|-------|--------|-----------|----------|----------------------|----------------------------|
|            |       |           |            |            |            | Normal           | Tumor |        |           |          |                      |                            |
| AA1204     | chr22 | 42523528  | rs1058172  | C          | T          | 31.48            | 27.85 | CYP2D6 | R311H     | MISSENSE | NON_SYNON' NA        |                            |
| UCI1821517 | chr22 | 42522613  | rs1135840  | G          | T          | 48.37            | 23.26 | CYP2D6 | T432S     | MISSENSE | NON_SYNON' NA        |                            |
| AA1090     | chr22 | 42526694  | rs1065852  | G          | A          | 47.13            | 15.31 | CYP2D6 | P34S      | MISSENSE | NON_SYNON' NA        |                            |
| UCI2564879 | chr7  | 117188715 | rs3034796  | GAAAGC     | G          | 22.39            | 17.15 | CFTR   | NA        | NONE     | FRAME_SHIF' NA       |                            |
| AA1090     | chr22 | 42523528  | rs1058172  | C          | T          | 33.49            | 10.91 | CYP2D6 | R311H     | MISSENSE | NON_SYNON' NA        |                            |
| UCI2008866 | chr22 | 42522613  | rs1135840  | G          | C          | 51.51            | 7.63  | CYP2D6 | T432S     | MISSENSE | NON_SYNON' NA        |                            |
| AA1367     | chr1  | 97547962  | .          | A          | G          | 50.98            | 49.64 | DPYD   | V944A     | MISSENSE | NON_SYNON' D         |                            |
| UCI2008866 | chr1  | 97770920  | rs1801160  | C          | T          | 42.18            | 49.77 | DPYD   | V732I     | MISSENSE | NON_SYNON' D         |                            |
| UCI1804937 | chr1  | 97770920  | rs1801160  | C          | T          | 48.73            | 48.91 | DPYD   | V732I     | MISSENSE | NON_SYNON' D         |                            |
| AA952      | chr1  | 97770920  | rs1801160  | C          | T          | 48.21            | 47.18 | DPYD   | V732I     | MISSENSE | NON_SYNON' D         |                            |
| UCI1546879 | chr1  | 98144726  | rs45589337 | T          | C          | 49.13            | 45.82 | DPYD   | K259E     | MISSENSE | NON_SYNON' D         |                            |
| AA948      | chr1  | 98144726  | rs45589337 | T          | C          | 48.18            | 44.7  | DPYD   | K259E     | MISSENSE | NON_SYNON' D         |                            |
| AA1025     | chr1  | 98348885  | rs1801265  | G          | A          | 53.3             | 53.25 | DPYD   | R29C      | MISSENSE | NON_SYNON' None      |                            |
| AA1077     | chr1  | 98348885  | rs1801265  | G          | A          | 50.87            | 69.92 | DPYD   | R29C      | MISSENSE | NON_SYNON' None      |                            |
| AA1090     | chr1  | 98348885  | rs1801265  | G          | A          | 44.09            | 51.46 | DPYD   | R29C      | MISSENSE | NON_SYNON' None      |                            |
| AA943      | chr1  | 98348885  | rs1801265  | G          | A          | 99.85            | 99.85 | DPYD   | R29C      | MISSENSE | NON_SYNON' None      |                            |
| AA1188     | chr1  | 98348885  | rs1801265  | G          | A          | 99.84            | 99.64 | DPYD   | R29C      | MISSENSE | NON_SYNON' None      |                            |
| AA1204     | chr1  | 98348885  | rs1801265  | G          | A          | 99.73            | 99.32 | DPYD   | R29C      | MISSENSE | NON_SYNON' None      |                            |
| AA1222     | chr1  | 98348885  | rs1801265  | G          | A          | 99.72            | 99.57 | DPYD   | R29C      | MISSENSE | NON_SYNON' None      |                            |
| AA1247     | chr1  | 98348885  | rs1801265  | G          | A          | 99.82            | 99.9  | DPYD   | R29C      | MISSENSE | NON_SYNON' None      |                            |
| AA1267     | chr1  | 98348885  | rs1801265  | G          | A          | 99.81            | 99.8  | DPYD   | R29C      | MISSENSE | NON_SYNON' None      |                            |
| AA1277     | chr1  | 98348885  | rs1801265  | G          | A          | 99.59            | 98.89 | DPYD   | R29C      | MISSENSE | NON_SYNON' None      |                            |
| AA1307     | chr1  | 98348885  | rs1801265  | G          | A          | 48.69            | 57.06 | DPYD   | R29C      | MISSENSE | NON_SYNON' None      |                            |
| AA957      | chr1  | 98348885  | rs1801265  | G          | A          | 99.64            | 99.58 | DPYD   | R29C      | MISSENSE | NON_SYNON' None      |                            |
| AA926      | chr1  | 98348885  | rs1801265  | G          | A          | 46.27            | 61.67 | DPYD   | R29C      | MISSENSE | NON_SYNON' None      |                            |
| AA930      | chr1  | 98348885  | rs1801265  | G          | A          | 99.69            | 100   | DPYD   | R29C      | MISSENSE | NON_SYNON' None      |                            |
| AA1106     | chr1  | 98348885  | rs1801265  | G          | A          | 46.9             | 41.07 | DPYD   | R29C      | MISSENSE | NON_SYNON' None      |                            |
| AA952      | chr1  | 98348885  | rs1801265  | G          | A          | 99.05            | 98.43 | DPYD   | R29C      | MISSENSE | NON_SYNON' None      |                            |
| AA1367     | chr1  | 98348885  | rs1801265  | G          | A          | 49.68            | 48.17 | DPYD   | R29C      | MISSENSE | NON_SYNON' None      |                            |
| AA960      | chr1  | 98348885  | rs1801265  | G          | A          | 99.18            | 99.67 | DPYD   | R29C      | MISSENSE | NON_SYNON' None      |                            |
| AA1515     | chr1  | 98348885  | rs1801265  | G          | A          | 99.68            | 100   | DPYD   | R29C      | MISSENSE | NON_SYNON' None      |                            |
| UCI1546879 | chr1  | 98348885  | rs1801265  | G          | A          | 54.6             | 46.67 | DPYD   | R29C      | MISSENSE | NON_SYNON' None      |                            |
| UCI1689380 | chr1  | 98348885  | rs1801265  | G          | A          | 49.26            | 7.82  | DPYD   | R29C      | MISSENSE | NON_SYNON' None      |                            |
| UCI1804937 | chr1  | 98348885  | rs1801265  | G          | A          | 99.56            | 99.72 | DPYD   | R29C      | MISSENSE | NON_SYNON' None      |                            |
| UCI1821517 | chr1  | 98348885  | rs1801265  | G          | A          | 99.85            | 99.74 | DPYD   | R29C      | MISSENSE | NON_SYNON' None      |                            |
| UCI1908503 | chr1  | 98348885  | rs1801265  | G          | A          | 99.16            | 99.44 | DPYD   | R29C      | MISSENSE | NON_SYNON' None      |                            |
| UCI1951813 | chr1  | 98348885  | rs1801265  | G          | A          | 99.36            | 99.46 | DPYD   | R29C      | MISSENSE | NON_SYNON' None      |                            |
| UCI2008866 | chr1  | 98348885  | rs1801265  | G          | A          | 100              | 99.81 | DPYD   | R29C      | MISSENSE | NON_SYNON' None      |                            |
| UCI2076630 | chr1  | 98348885  | rs1801265  | G          | A          | 99.74            | 99.63 | DPYD   | R29C      | MISSENSE | NON_SYNON' None      |                            |
| UCI2219330 | chr1  | 98348885  | rs1801265  | G          | A          | 49.84            | 51.54 | DPYD   | R29C      | MISSENSE | NON_SYNON' None      |                            |
| UCI2224680 | chr1  | 98348885  | rs1801265  | G          | A          | 99.76            | 99.62 | DPYD   | R29C      | MISSENSE | NON_SYNON' None      |                            |
| UCI2231576 | chr1  | 98348885  | rs1801265  | G          | A          | 99.04            | 100   | DPYD   | R29C      | MISSENSE | NON_SYNON' None      |                            |
| UCI2564879 | chr1  | 98348885  | rs1801265  | G          | A          | 99.52            | 99.52 | DPYD   | R29C      | MISSENSE | NON_SYNON' None      |                            |
| UCI2649875 | chr1  | 98348885  | rs1801265  | G          | A          | 99.66            | 99.61 | DPYD   | R29C      | MISSENSE | NON_SYNON' None      |                            |
| UCI3165498 | chr1  | 98348885  | rs1801265  | G          | A          | 99.54            | 99.55 | DPYD   | R29C      | MISSENSE | NON_SYNON' None      |                            |
| UCI3564897 | chr1  | 98348885  | rs1801265  | G          | A          | 56.6             | 62.3  | DPYD   | R29C      | MISSENSE | NON_SYNON' None      |                            |
| UCI4216548 | chr1  | 98348885  | rs1801265  | G          | A          | 42.97            | 34.24 | DPYD   | R29C      | MISSENSE | NON_SYNON' None      |                            |
| UCI8965412 | chr1  | 98348885  | rs1801265  | G          | A          | 50               | 28.43 | DPYD   | R29C      | MISSENSE | NON_SYNON' None      |                            |
| UCI9135402 | chr1  | 98348885  | rs1801265  | G          | A          | 99.32            | 99.29 | DPYD   | R29C      | MISSENSE | NON_SYNON' None      |                            |
| AA1025     | chr1  | 98165091  | rs2297595  | T          | C          | 50.68            | 52.45 | DPYD   | M166V     | MISSENSE | NON_SYNON' P         |                            |
| AA1277     | chr1  | 97981395  | rs1801159  | T          | C          | 50.77            | 51.41 | DPYD   | I543V     | MISSENSE | NON_SYNON' P         |                            |
| AA1307     | chr1  | 97981395  | rs1801159  | T          | C          | 55.5             | 58    | DPYD   | I543V     | MISSENSE | NON_SYNON' P         |                            |
| AA926      | chr1  | 97981395  | rs1801159  | T          | C          | 49.05            | 65.39 | DPYD   | I543V     | MISSENSE | NON_SYNON' P         |                            |
| AA1106     | chr1  | 98165091  | rs2297595  | T          | C          | 51.31            | 56.62 | DPYD   | M166V     | MISSENSE | NON_SYNON' P         |                            |
| AA1515     | chr1  | 97981395  | rs1801159  | T          | C          | 55.66            | 23.34 | DPYD   | I543V     | MISSENSE | NON_SYNON' P         |                            |
| UCI1689380 | chr1  | 97981395  | rs1801159  | T          | C          | 50.67            | 8.63  | DPYD   | I543V     | MISSENSE | NON_SYNON' P         |                            |
| UCI1821517 | chr1  | 97981395  | rs1801159  | T          | C          | 52.06            | 37.27 | DPYD   | I543V     | MISSENSE | NON_SYNON' P         |                            |
| UCI1908503 | chr1  | 97981395  | rs1801159  | T          | C          | 53.61            | 51.82 | DPYD   | I543V     | MISSENSE | NON_SYNON' P         |                            |
| UCI1951813 | chr1  | 97981395  | rs1801159  | T          | C          | 50.22            | 45.62 | DPYD   | I543V     | MISSENSE | NON_SYNON' P         |                            |
| UCI2008866 | chr1  | 97981395  | rs1801159  | T          | C          | 50.47            | 48.61 | DPYD   | I543V     | MISSENSE | NON_SYNON' P         |                            |
| UCI2076630 | chr1  | 97981395  | rs1801159  | T          | C          | 52.51            | 40.7  | DPYD   | I543V     | MISSENSE | NON_SYNON' P         |                            |
| UCI2224680 | chr1  | 97981395  | rs1801159  | T          | C          | 49.21            | 51.76 | DPYD   | I543V     | MISSENSE | NON_SYNON' P         |                            |
| UCI2231576 | chr1  | 97981395  | rs1801159  | T          | C          | 46.64            | 46.7  | DPYD   | I543V     | MISSENSE | NON_SYNON' P         |                            |
| UCI2564879 | chr1  | 97981395  | rs1801159  | T          | C          | 56.11            | 58.89 | DPYD   | I543V     | MISSENSE | NON_SYNON' P         |                            |
| UCI8965412 | chr1  | 98165091  | rs2297595  | T          | C          | 44.19            | 65.79 | DPYD   | M166V     | MISSENSE | NON_SYNON' P         |                            |
| AA1222     | chr7  | 55214348  | rs2072454  | C          | T          | 99.76            | 99.94 | EGFR   | NA        | NONE     | SPLICE_SITE_ACCEPTOR |                            |
| AA1077     | chr7  | 55229255  | rs2227983  | G          | A          | 47.74            | 26.73 | EGFR   | R315K     | MISSENSE | NON_SYNON' N         |                            |
| UCI2076630 | chr7  | 55214348  | rs2072454  | C          | T          | 99.43            | 99.8  | EGFR   | NA        | NONE     | SPLICE_SITE_ACCEPTOR |                            |
| UCI2564879 | chr7  | 55214348  | rs2072454  | C          | T          | 99.63            | 99.74 | EGFR   | NA        | NONE     | SPLICE_SITE_ACCEPTOR |                            |
| UCI2008866 | chr7  | 55214348  | rs2072454  | C          | T          | 99.83            | 99.63 | EGFR   | NA        | NONE     | SPLICE_SITE_ACCEPTOR |                            |
| UCI2231576 | chr7  | 55214348  | rs2072454  | C          | T          | 99.24            | 99.55 | EGFR   | NA        | NONE     | SPLICE_SITE_ACCEPTOR |                            |
| UCI3165498 | chr7  | 55214348  | rs2072454  | C          | T          | 99.62            | 99.43 | EGFR   | NA        | NONE     | SPLICE_SITE_ACCEPTOR |                            |
| AA1277     | chr7  | 55214348  | rs2072454  | C          | T          | 98.96            | 99.39 | EGFR   | NA        | NONE     | SPLICE_SITE_ACCEPTOR |                            |
| AA1367     | chr7  | 55214348  | rs2072454  | C          | T          | 98.96            | 98.71 | EGFR   | NA        | NONE     | SPLICE_SITE_ACCEPTOR |                            |
| UCI1951813 | chr7  | 55214348  | rs2072454  | C          | T          | 88.82            | 88.5  | EGFR   | NA        | NONE     | SPLICE_SITE_ACCEPTOR |                            |
| AA1277     | chr7  | 55229255  | rs2227983  | G          | A          | 51.62            | 49.69 | EGFR   | R315K     | MISSENSE | NON_SYNON' N         |                            |
| UCI2649875 | chr7  | 55214348  | rs2072454  | C          | T          | 50.78            | 58.97 | EGFR   | NA        | NONE     | SPLICE_SITE_ACCEPTOR |                            |
| UCI1546879 | chr7  | 55211102  | .          | T          | A          | 51.88            | 58.71 | EGFR   | N115K     | MISSENSE | NON_SYNON' D         |                            |
| UCI1546879 | chr7  | 55214348  | rs2072454  | C          | T          | 46.21            | 57.54 | EGFR   | NA        | NONE     | SPLICE_SITE_ACCEPTOR |                            |
| AA1204     | chr7  | 55214348  | rs2072454  | C          | T          | 50.15            | 56.03 | EGFR   | NA        | NONE     | SPLICE_SITE_ACCEPTOR |                            |
| UCI1908503 | chr7  | 55214348  | rs2072454  | C          | T          | 39.01            | 55.59 | EGFR   | NA        | NONE     | SPLICE_SITE_ACCEPTOR |                            |
| AA1106     | chr7  | 55214348  | rs2072454  | C          | T          | 48.9             | 53.49 | EGFR   | NA        | NONE     | SPLICE_SITE_ACCEPTOR |                            |
| AA1188     | chr7  | 55214348  | rs2072454  | C          | T          | 49.73            | 53.42 | EGFR   | NA        | NONE     | SPLICE_SITE_ACCEPTOR |                            |
| AA952      | chr7  | 55229255  | rs2227983  | G          | A          | 54.89            | 40.55 | EGFR   | R315K     | MISSENSE | NON_SYNON' N         |                            |
| UCI8965412 | chr7  | 55214348  | rs2072454  | C          | T          | 51.71            | 52.08 | EGFR   | NA        | NONE     | SPLICE_SITE_ACCEPTOR |                            |
| AA1367     | chr7  | 55229255  | rs2227983  | G          | A          | 49.66            | 47.64 | EGFR   | R315K     | MISSENSE | NON_SYNON' N         |                            |
| AA943      | chr7  | 55214348  | rs2072454  | C          | T          | 49.79            | 50.81 | EGFR   | NA        | NONE     | SPLICE_SITE_ACCEPTOR |                            |
| AA960      | chr7  | 55229255  | rs2227983  | G          | A          | 50.73            | 51.64 | EGFR   | R315K     | MISSENSE | NON_SYNON' N         |                            |
| UCI1546879 | chr7  | 55229255  | rs2227983  | G          | A          | 38.63            | 55.89 | EGFR   | R315K     | MISSENSE | NON_SYNON' N         |                            |
| AA1025     | chr7  | 55214348  | rs2072454  | C          | T          | 52.34            | 49.34 | EGFR   | NA        | NONE     | SPLICE_SITE_ACCEPTOR |                            |
| UCI2224680 | chr7  | 55214348  | rs2072454  | C          | T          | 49.53            | 49.17 | EGFR   | NA        | NONE     | SPLICE_SITE_ACCEPTOR |                            |
| AA948      | chr7  | 55214348  | rs2072454  | C          | T          | 45.64            | 48.17 | EGFR   | NA        | NONE     | SPLICE_SITE_ACCEPTOR |                            |
| UCI1804937 | chr7  | 55229255  | rs2227983  | G          | A          | 48.2             | 44.07 | EGFR   | R315K     | MISSENSE | NON_SYNON' N         |                            |
| UCI1821517 | chr7  | 55229255  | rs2227983  | G          | A          | 97.35            | 96.5  | EGFR   | R315K     | MISSENSE | NON_SYNON' N         |                            |
| UCI2219330 | chr7  | 55214348  | rs2072454  | C          | T          | 47.07            | 46.7  | EGFR   | NA        | NONE     | SPLICE_SITE_ACCEPTOR |                            |
| UCI1951813 | chr7  | 55229255  | rs2227983  | G          | A          | 48.27            | 47.56 | EGFR   | R315K     | MISSENSE | NON_SYNON' N         |                            |
| AA930      | chr7  | 55214348  | rs2072454  | C          | T          | 49.59            | 45.55 | EGFR   | NA        | NONE     | SPLICE_SITE_ACCEPTOR |                            |
| UCI1804937 | chr7  | 55223641  | .          | T          | G          | 45.2             | 45.1  | EGFR   | NA        | NONE     | SPLICE_SITE_ACCEPTOR |                            |
| AA957      | chr7  | 55214348  | rs2072454  | C          | T          | 45.85            | 43.73 | EGFR   | NA        | NONE     | SPLICE_SITE_ACCEPTOR |                            |
| AA1247     | chr7  | 55214348  | rs2072454  | C          | T          | 51.16            | 43.64 | EGFR   | NA        | NONE     | SPLICE_SITE_ACCEPTOR |                            |

Table S8: List of non-silent germline variants

| Sample     | Chr   | Cord      | rsID        | Ref Allele | Alt Allele | Allelic Fraction |       | Gene  | AA change | Type     | Effect               | Mutation Taster Prediction |
|------------|-------|-----------|-------------|------------|------------|------------------|-------|-------|-----------|----------|----------------------|----------------------------|
|            |       |           |             |            |            | Normal           | Tumor |       |           |          |                      |                            |
| UCI2076630 | chr7  | 55229255  | rs2227983   | G          | A          | 57.79            | 58.63 | EGFR  | R315K     | MISSENSE | NON_SYNON'N          |                            |
| UCI1804937 | chr7  | 55214348  | rs2072454   | C          | T          | 46.47            | 43.15 | EGFR  | NA        | NONE     | SPLICE_SITE_ACCEPTOR |                            |
| AA952      | chr7  | 55214348  | rs2072454   | C          | T          | 56.13            | 42.31 | EGFR  | NA        | NONE     | SPLICE_SITE_ACCEPTOR |                            |
| UCI2219330 | chr7  | 55229255  | rs2227983   | G          | A          | 53.58            | 53.89 | EGFR  | R315K     | MISSENSE | NON_SYNON'N          |                            |
| UCI1804937 | chr7  | 140481383 | .           | CT         | C          | 23.36            | 25.83 | BRAF  | NA        | NONE     | FRAME_SHIF'NA        |                            |
| UCI1804937 | chr7  | 55223636  | .           | A          | C          | 25.69            | 29.4  | EGFR  | K129Q     | MISSENSE | NON_SYNON'D          |                            |
| UCI1689380 | chr7  | 55214348  | rs2072454   | C          | T          | 47.24            | 29.24 | EGFR  | NA        | NONE     | SPLICE_SITE_ACCEPTOR |                            |
| UCI1821517 | chr7  | 55214348  | rs2072454   | C          | T          | 42.77            | 27.13 | EGFR  | NA        | NONE     | SPLICE_SITE_ACCEPTOR |                            |
| UCI2649875 | chr7  | 55229255  | rs2227983   | G          | A          | 47.93            | 63.59 | EGFR  | R315K     | MISSENSE | NON_SYNON'N          |                            |
| UCI3564897 | chr7  | 55229255  | rs2227983   | G          | A          | 47.49            | 37.08 | EGFR  | R315K     | MISSENSE | NON_SYNON'N          |                            |
| UCI4216548 | chr7  | 55229255  | rs2227983   | G          | A          | 48.25            | 92.38 | EGFR  | R315K     | MISSENSE | NON_SYNON'N          |                            |
| UCI8965412 | chr7  | 55229255  | rs2227983   | G          | A          | 49.66            | 46.37 | EGFR  | R315K     | MISSENSE | NON_SYNON'N          |                            |
| UCI9135402 | chr7  | 55238227  | rs10258568  | C          | T          | 48.74            | 69.88 | EGFR  | S703F     | MISSENSE | NON_SYNON'N          |                            |
| AA1025     | chr17 | 37884037  | rs61552325  | C          | G          | 48.64            | 35.13 | ERBB2 | P1140A    | MISSENSE | NON_SYNON'P          |                            |
| AA1077     | chr17 | 37884037  | rs61552325  | C          | G          | 58.22            | 22.31 | ERBB2 | P1140A    | MISSENSE | NON_SYNON'P          |                            |
| AA1090     | chr17 | 37884037  | rs61552325  | C          | G          | 99.83            | 99.63 | ERBB2 | P1140A    | MISSENSE | NON_SYNON'P          |                            |
| AA943      | chr17 | 37884037  | rs61552325  | C          | G          | 57.08            | 53.89 | ERBB2 | P1140A    | MISSENSE | NON_SYNON'P          |                            |
| AA1188     | chr17 | 37884037  | rs61552325  | C          | G          | 99.85            | 99.94 | ERBB2 | P1140A    | MISSENSE | NON_SYNON'P          |                            |
| UCI1821517 | chr17 | 37879588  | rs1136201   | A          | G          | 97.02            | 97.4  | ERBB2 | I379V     | MISSENSE | NON_SYNON'D          |                            |
| UCI8965412 | chr17 | 37879588  | rs1136201   | A          | G          | 52.19            | 95.5  | ERBB2 | I379V     | MISSENSE | NON_SYNON'D          |                            |
| AA1247     | chr17 | 37855834  | rs4252596   | C          | A          | 45.24            | 94.81 | ERBB2 | P8T       | MISSENSE | NON_SYNON'NA         |                            |
| UCI2649875 | chr17 | 37855834  | rs4252596   | C          | A          | 95.49            | 94.34 | ERBB2 | P8T       | MISSENSE | NON_SYNON'NA         |                            |
| AA1204     | chr17 | 37884037  | rs61552325  | C          | G          | 46.8             | 15.08 | ERBB2 | P1140A    | MISSENSE | NON_SYNON'P          |                            |
| AA1222     | chr17 | 37879588  | rs1136201   | A          | G          | 51.36            | 92.33 | ERBB2 | I379V     | MISSENSE | NON_SYNON'D          |                            |
| AA1222     | chr17 | 37884037  | rs61552325  | C          | G          | 99.67            | 99.83 | ERBB2 | P1140A    | MISSENSE | NON_SYNON'P          |                            |
| UCI3165498 | chr17 | 37855834  | rs4252596   | C          | A          | 51.28            | 86.35 | ERBB2 | P8T       | MISSENSE | NON_SYNON'NA         |                            |
| AA1247     | chr17 | 37884037  | rs61552325  | C          | G          | 51.93            | 96.2  | ERBB2 | P1140A    | MISSENSE | NON_SYNON'P          |                            |
| AA960      | chr17 | 37879588  | rs1136201   | A          | G          | 52.54            | 78.4  | ERBB2 | I379V     | MISSENSE | NON_SYNON'D          |                            |
| AA1267     | chr17 | 37872589  | .           | C          | T          | 23.75            | 2.45  | ERBB2 | R241*     | NONSENSE | STOP_GAINEIA         |                            |
| AA1267     | chr17 | 37884037  | rs61552325  | C          | G          | 99.91            | 99.74 | ERBB2 | P1140A    | MISSENSE | NON_SYNON'P          |                            |
| AA1277     | chr17 | 37884037  | rs61552325  | C          | G          | 52.24            | 95.93 | ERBB2 | P1140A    | MISSENSE | NON_SYNON'P          |                            |
| AA1106     | chr17 | 37879588  | rs1136201   | A          | G          | 51.63            | 58.36 | ERBB2 | I379V     | MISSENSE | NON_SYNON'D          |                            |
| UCI1546879 | chr17 | 37879588  | rs1136201   | A          | G          | 50.8             | 58.31 | ERBB2 | I379V     | MISSENSE | NON_SYNON'D          |                            |
| AA926      | chr17 | 37884037  | rs61552325  | C          | G          | 99.94            | 99.52 | ERBB2 | P1140A    | MISSENSE | NON_SYNON'P          |                            |
| AA1515     | chr17 | 37855834  | rs4252596   | C          | A          | 53.28            | 56.17 | ERBB2 | P8T       | MISSENSE | NON_SYNON'NA         |                            |
| AA930      | chr17 | 37884037  | rs61552325  | C          | G          | 50.29            | 47.57 | ERBB2 | P1140A    | MISSENSE | NON_SYNON'P          |                            |
| AA930      | chr17 | 37884070  | .           | C          | A          | 49.96            | 47.38 | ERBB2 | V1151I    | MISSENSE | NON_SYNON'N          |                            |
| AA1106     | chr17 | 37884037  | rs61552325  | C          | G          | 47.33            | 61.23 | ERBB2 | P1140A    | MISSENSE | NON_SYNON'P          |                            |
| AA948      | chr17 | 37884037  | rs61552325  | C          | G          | 50.62            | 51.51 | ERBB2 | P1140A    | MISSENSE | NON_SYNON'P          |                            |
| UCI1804937 | chr17 | 37855834  | rs4252596   | C          | A          | 41.34            | 52.48 | ERBB2 | P8T       | MISSENSE | NON_SYNON'NA         |                            |
| AA952      | chr17 | 37884037  | rs61552325  | C          | G          | 99.79            | 98.66 | ERBB2 | P1140A    | MISSENSE | NON_SYNON'P          |                            |
| AA926      | chr17 | 37855834  | rs4252596   | C          | A          | 51.02            | 52.25 | ERBB2 | P8T       | MISSENSE | NON_SYNON'NA         |                            |
| AA1267     | chr17 | 37855834  | rs4252596   | C          | A          | 46.64            | 51.83 | ERBB2 | P8T       | MISSENSE | NON_SYNON'NA         |                            |
| AA1367     | chr17 | 37884037  | rs61552325  | C          | G          | 99.82            | 99.61 | ERBB2 | P1140A    | MISSENSE | NON_SYNON'P          |                            |
| AA960      | chr17 | 37884037  | rs61552325  | C          | G          | 49.07            | 83.65 | ERBB2 | P1140A    | MISSENSE | NON_SYNON'P          |                            |
| AA1188     | chr17 | 37879588  | rs1136201   | A          | G          | 48.97            | 50.3  | ERBB2 | I379V     | MISSENSE | NON_SYNON'D          |                            |
| AA1515     | chr17 | 37884037  | rs61552325  | C          | G          | 99.68            | 99.64 | ERBB2 | P1140A    | MISSENSE | NON_SYNON'P          |                            |
| AA1267     | chr17 | 37879588  | rs1136201   | A          | G          | 48.02            | 49.39 | ERBB2 | I379V     | MISSENSE | NON_SYNON'D          |                            |
| UCI1546879 | chr17 | 37884037  | rs61552325  | C          | G          | 99.9             | 99.75 | ERBB2 | P1140A    | MISSENSE | NON_SYNON'P          |                            |
| UCI1689380 | chr17 | 37884037  | rs61552325  | C          | G          | 50.64            | 44.94 | ERBB2 | P1140A    | MISSENSE | NON_SYNON'P          |                            |
| UCI9135402 | chr17 | 37884176  | rs55943169  | C          | A          | 46.3             | 48.18 | ERBB2 | A1186D    | MISSENSE | NON_SYNON'D          |                            |
| AA1188     | chr17 | 37855834  | rs4252596   | C          | A          | 50.81            | 48.08 | ERBB2 | P8T       | MISSENSE | NON_SYNON'NA         |                            |
| UCI1804937 | chr17 | 37884037  | rs61552325  | C          | G          | 47.36            | 63.41 | ERBB2 | P1140A    | MISSENSE | NON_SYNON'P          |                            |
| UCI1821517 | chr17 | 37884037  | rs61552325  | C          | G          | 54.64            | 27.07 | ERBB2 | P1140A    | MISSENSE | NON_SYNON'P          |                            |
| AA930      | chr17 | 37855834  | rs4252596   | C          | A          | 46.46            | 46.74 | ERBB2 | P8T       | MISSENSE | NON_SYNON'NA         |                            |
| UCI9135402 | chr17 | 37879588  | rs1136201   | A          | G          | 54.95            | 46.14 | ERBB2 | I379V     | MISSENSE | NON_SYNON'D          |                            |
| AA957      | chr17 | 37879588  | rs1136201   | A          | G          | 54.25            | 46.1  | ERBB2 | I379V     | MISSENSE | NON_SYNON'D          |                            |
| UCI1951813 | chr17 | 37884037  | rs61552325  | C          | G          | 53.69            | 53.72 | ERBB2 | P1140A    | MISSENSE | NON_SYNON'P          |                            |
| UCI2231576 | chr17 | 37855834  | rs4252596   | C          | A          | 44.96            | 45.28 | ERBB2 | P8T       | MISSENSE | NON_SYNON'NA         |                            |
| AA948      | chr17 | 37855834  | rs4252596   | C          | A          | 44.04            | 44.94 | ERBB2 | P8T       | MISSENSE | NON_SYNON'NA         |                            |
| UCI2008866 | chr17 | 37884037  | rs61552325  | C          | G          | 99.87            | 99.71 | ERBB2 | P1140A    | MISSENSE | NON_SYNON'P          |                            |
| UCI2076630 | chr17 | 37855834  | rs4252596   | C          | A          | 41.68            | 43.29 | ERBB2 | P8T       | MISSENSE | NON_SYNON'NA         |                            |
| UCI2076630 | chr17 | 37884037  | rs61552325  | C          | G          | 99.79            | 99.71 | ERBB2 | P1140A    | MISSENSE | NON_SYNON'P          |                            |
| AA943      | chr17 | 37879588  | rs1136201   | A          | G          | 48.67            | 41.78 | ERBB2 | I379V     | MISSENSE | NON_SYNON'D          |                            |
| UCI2219330 | chr17 | 37884037  | rs61552325  | C          | G          | 52.16            | 51.99 | ERBB2 | P1140A    | MISSENSE | NON_SYNON'P          |                            |
| UCI1689380 | chr17 | 37879588  | rs1136201   | A          | G          | 52.07            | 40.2  | ERBB2 | I379V     | MISSENSE | NON_SYNON'D          |                            |
| UCI1546879 | chr17 | 37855834  | rs4252596   | C          | A          | 48.24            | 38.62 | ERBB2 | P8T       | MISSENSE | NON_SYNON'NA         |                            |
| UCI2224680 | chr17 | 37884037  | rs61552325  | C          | G          | 99.64            | 99.5  | ERBB2 | P1140A    | MISSENSE | NON_SYNON'P          |                            |
| AA1025     | chr17 | 37855834  | rs4252596   | C          | A          | 53.14            | 35.16 | ERBB2 | P8T       | MISSENSE | NON_SYNON'NA         |                            |
| UCI2231576 | chr17 | 37884037  | rs61552325  | C          | G          | 57.2             | 49.22 | ERBB2 | P1140A    | MISSENSE | NON_SYNON'P          |                            |
| UCI1821517 | chr17 | 37884176  | rs55943169  | C          | A          | 42.72            | 25.95 | ERBB2 | A1186D    | MISSENSE | NON_SYNON'D          |                            |
| AA1077     | chr17 | 37879588  | rs1136201   | A          | G          | 55.01            | 23.24 | ERBB2 | I379V     | MISSENSE | NON_SYNON'D          |                            |
| UCI2649875 | chr17 | 37884037  | rs61552325  | C          | G          | 98.01            | 99.02 | ERBB2 | P1140A    | MISSENSE | NON_SYNON'P          |                            |
| AA1307     | chr17 | 37879588  | rs1136201   | A          | G          | 46.85            | 19.79 | ERBB2 | I379V     | MISSENSE | NON_SYNON'D          |                            |
| UCI3165498 | chr17 | 37884037  | rs61552325  | C          | G          | 99.87            | 99.86 | ERBB2 | P1140A    | MISSENSE | NON_SYNON'P          |                            |
| UCI3564897 | chr17 | 37884037  | rs61552325  | C          | G          | 99.14            | 100   | ERBB2 | P1140A    | MISSENSE | NON_SYNON'P          |                            |
| AA1090     | chr17 | 37879588  | rs1136201   | A          | G          | 48.91            | 13.64 | ERBB2 | I379V     | MISSENSE | NON_SYNON'D          |                            |
| UCI8965412 | chr17 | 37884037  | rs61552325  | C          | G          | 51.25            | 94.65 | ERBB2 | P1140A    | MISSENSE | NON_SYNON'P          |                            |
| UCI9135402 | chr17 | 37884037  | rs61552325  | C          | G          | 49.81            | 47.18 | ERBB2 | P1140A    | MISSENSE | NON_SYNON'P          |                            |
| AA1222     | chr17 | 37855834  | rs4252596   | C          | A          | 47.87            | 7.86  | ERBB2 | P8T       | MISSENSE | NON_SYNON'NA         |                            |
| UCI1689380 | chr12 | 56494998  | rs773123    | A          | T          | 99.28            | 99.33 | ERBB3 | S1060C    | MISSENSE | NON_SYNON'D          |                            |
| UCI2008866 | chr12 | 56494998  | rs773123    | A          | T          | 53.41            | 89.18 | ERBB3 | S1060C    | MISSENSE | NON_SYNON'D          |                            |
| UCI3564897 | chr12 | 56494998  | rs773123    | A          | T          | 46.53            | 88.63 | ERBB3 | S1060C    | MISSENSE | NON_SYNON'D          |                            |
| UCI3165498 | chr12 | 56494998  | rs773123    | A          | T          | 50.54            | 64.31 | ERBB3 | S1060C    | MISSENSE | NON_SYNON'D          |                            |
| AA957      | chr12 | 56495339  | rs55699040  | C          | A          | 46.98            | 53.19 | ERBB3 | L1118I    | MISSENSE | NON_SYNON'D          |                            |
| UCI2649875 | chr12 | 56494998  | rs773123    | A          | T          | 53.88            | 50.94 | ERBB3 | S1060C    | MISSENSE | NON_SYNON'D          |                            |
| UCI2231576 | chr12 | 56494998  | rs773123    | A          | T          | 45.66            | 50.59 | ERBB3 | S1060C    | MISSENSE | NON_SYNON'D          |                            |
| AA1267     | chr12 | 56494998  | rs773123    | A          | T          | 52.05            | 50.09 | ERBB3 | S1060C    | MISSENSE | NON_SYNON'D          |                            |
| UCI2219330 | chr12 | 56493677  | rs56259600  | A          | G          | 50.79            | 47.27 | ERBB3 | K118R     | MISSENSE | NON_SYNON'D          |                            |
| UCI1804937 | chr12 | 56494998  | rs773123    | A          | T          | 46.09            | 47.14 | ERBB3 | S1060C    | MISSENSE | NON_SYNON'D          |                            |
| AA1025     | chr12 | 56494998  | rs773123    | A          | T          | 52.82            | 44.5  | ERBB3 | S1060C    | MISSENSE | NON_SYNON'D          |                            |
| AA1106     | chr12 | 56494998  | rs773123    | A          | T          | 17.66            | 38.69 | ERBB3 | S1060C    | MISSENSE | NON_SYNON'D          |                            |
| AA1204     | chr12 | 56494998  | rs773123    | A          | T          | 52.04            | 31.69 | ERBB3 | S1060C    | MISSENSE | NON_SYNON'D          |                            |
| AA1247     | chr8  | 38275808  | .           | C          | A          | 46.39            | 82.95 | FGFR1 | M365I     | MISSENSE | NON_SYNON'D          |                            |
| UCI2076630 | chr8  | 38285913  | rs138489552 | G          | GTCA       | 48.57            | 75.33 | FGFR1 | D125VN    | NONE     | CODON_CHAINA         |                            |
| UCI2564879 | chr8  | 38287238  | rs140382957 | G          | A          | 54.75            | 55.7  | FGFR1 | S107L     | MISSENSE | NON_SYNON'D          |                            |
| UCI2219330 | chr7  | 117188715 | rs3034796   | GAAAGC     | C          | 23.48            | 16.42 | CFTR  | NA        | NONE     | FRAME_SHIF'NA        |                            |
| UCI1546879 | chr8  | 38282083  | .           | C          | T          | 15.43            | 2.22  | FGFR1 | E134K     | MISSENSE | NON_SYNON'D          |                            |
| AA957      | chr10 | 123260337 | .           | CA         | C          | 43.25            | 43.76 | FGFR2 | NA        | NONE     | SPLICE_SITE'NA       |                            |
| UCI2224680 | chr10 | 123310871 | rs755793    | A          | G          | 45.05            | 31.04 | FGFR2 | M186T     | MISSENSE | NON_SYNON'P          |                            |

Table S8: List of non-silent germline variants

| Sample     | Chr   | Cord      | rsID        | Ref Allele | Alt Allele | Allelic Fraction |       | Gene  | AA change | Type     | Effect         | Mutation Taster Prediction |
|------------|-------|-----------|-------------|------------|------------|------------------|-------|-------|-----------|----------|----------------|----------------------------|
|            |       |           |             |            |            | Normal           | Tumor |       |           |          |                |                            |
| UCI2564879 | chr10 | 123310871 | rs755793    | A          | G          | 48.26            | 57.51 | FGFR2 | M186T     | MISSENSE | NON_SYNON'P    |                            |
| AA1267     | chr10 | 8100506   | rs143627754 | C          | G          | 55.42            | 45.93 | GATA3 | D160E     | MISSENSE | NON_SYNON'D    |                            |
| AA1025     | chr9  | 5126715   | rs142269166 | A          | G          | 45.85            | 63.61 | JAK2  | N1108S    | MISSENSE | NON_SYNON'D    |                            |
| AA943      | chr9  | 5126343   | rs41316003  | G          | A          | 50.45            | 50.54 | JAK2  | R1063H    | MISSENSE | NON_SYNON'D    |                            |
| UCI1821517 | chr9  | 5072561   | rs139504737 | G          | A          | 50.59            | 26.71 | JAK2  | G422S     | MISSENSE | NON_SYNON'D    |                            |
| AA943      | chr19 | 17945696  | rs3213409   | C          | T          | 48.03            | 48.45 | JAK3  | V722I     | MISSENSE | NON_SYNON'None |                            |
| AA1267     | chr19 | 17943490  | .           | G          | A          | 53.27            | 53.54 | JAK3  | R840C     | MISSENSE | NON_SYNON'None |                            |
| AA1277     | chr19 | 17953321  | .           | C          | T          | 50.84            | 31.16 | JAK3  | R222H     | MISSENSE | NON_SYNON'None |                            |
| AA1090     | chr7  | 116364823 | rs34822187  | CA         | C          | 99.82            | 100   | MET   | NA        | NONE     | SPLICE_SITE,NA |                            |
| AA960      | chr7  | 116364823 | rs34822187  | CA         | C          | 99.7             | 100   | MET   | NA        | NONE     | SPLICE_SITE,NA |                            |
| AA1277     | chr7  | 116364823 | rs34822187  | CA         | C          | 99.91            | 99.86 | MET   | NA        | NONE     | SPLICE_SITE,NA |                            |
| AA1106     | chr7  | 116364823 | rs34822187  | CA         | C          | 99.84            | 99.81 | MET   | NA        | NONE     | SPLICE_SITE,NA |                            |
| UCI3165498 | chr7  | 116364823 | rs34822187  | CA         | C          | 100              | 99.69 | MET   | NA        | NONE     | SPLICE_SITE,NA |                            |
| UCI1689380 | chr7  | 116364823 | rs34822187  | CA         | C          | 99.67            | 99.68 | MET   | NA        | NONE     | SPLICE_SITE,NA |                            |
| AA1077     | chr7  | 116335811 | rs80153920  | A          | T          | 45.71            | 82.03 | MET   | M1L       | MISSENSE | NON_SYNON'NA   |                            |
| UCI1821517 | chr7  | 116335811 | rs80153920  | A          | T          | 53.76            | 76.42 | MET   | M1L       | MISSENSE | NON_SYNON'NA   |                            |
| UCI8965412 | chr7  | 116335811 | rs80153920  | A          | T          | 50.93            | 68.94 | MET   | M1L       | MISSENSE | NON_SYNON'NA   |                            |
| AA1307     | chr7  | 116339642 | rs55985569  | G          | T          | 43.12            | 63.01 | MET   | E168D     | MISSENSE | NON_SYNON'N    |                            |
| AA926      | chr7  | 116339600 | .           | A          | G          | 49.98            | 63.77 | MET   | I154M     | MISSENSE | NON_SYNON'D    |                            |
| AA1204     | chr7  | 116364823 | rs34822187  | CA         | C          | 47.2             | 60.56 | MET   | NA        | NONE     | SPLICE_SITE,NA |                            |
| AA1515     | chr7  | 116364823 | rs34822187  | CA         | C          | 53.63            | 58.35 | MET   | NA        | NONE     | SPLICE_SITE,NA |                            |
| UCI1546879 | chr7  | 116364823 | rs34822187  | CA         | C          | 47.17            | 56.82 | MET   | NA        | NONE     | SPLICE_SITE,NA |                            |
| UCI1908503 | chr7  | 116364823 | rs34822187  | CA         | C          | 51.3             | 54.44 | MET   | NA        | NONE     | SPLICE_SITE,NA |                            |
| AA957      | chr7  | 116364823 | rs34822187  | CA         | C          | 50.35            | 54.24 | MET   | NA        | NONE     | SPLICE_SITE,NA |                            |
| UCI1951813 | chr7  | 116364823 | rs34822187  | CA         | C          | 48.31            | 52.53 | MET   | NA        | NONE     | SPLICE_SITE,NA |                            |
| UCI2224680 | chr7  | 116364823 | rs34822187  | CA         | C          | 54.31            | 51.18 | MET   | NA        | NONE     | SPLICE_SITE,NA |                            |
| AA1188     | chr7  | 116364823 | rs34822187  | CA         | C          | 44.72            | 50.76 | MET   | NA        | NONE     | SPLICE_SITE,NA |                            |
| AA943      | chr7  | 116364823 | rs34822187  | CA         | C          | 48.73            | 50.49 | MET   | NA        | NONE     | SPLICE_SITE,NA |                            |
| AA948      | chr7  | 116364823 | rs34822187  | CA         | C          | 52.62            | 50.22 | MET   | NA        | NONE     | SPLICE_SITE,NA |                            |
| UCI2231576 | chr7  | 116364823 | rs34822187  | CA         | C          | 50.91            | 50.15 | MET   | NA        | NONE     | SPLICE_SITE,NA |                            |
| UCI2219330 | chr7  | 116411990 | rs56391007  | C          | T          | 54.2             | 48.74 | MET   | T1010I    | MISSENSE | NON_SYNON'D    |                            |
| AA1367     | chr7  | 116436122 | .           | G          | C          | 47.29            | 48.61 | MET   | D1373H    | MISSENSE | NON_SYNON'D    |                            |
| AA930      | chr7  | 116364823 | rs34822187  | CA         | C          | 48.55            | 48.39 | MET   | NA        | NONE     | SPLICE_SITE,NA |                            |
| AA1367     | chr7  | 116364823 | rs34822187  | CA         | C          | 54.35            | 46.87 | MET   | NA        | NONE     | SPLICE_SITE,NA |                            |
| UCI2219330 | chr7  | 116364823 | rs34822187  | CA         | C          | 62.82            | 45.96 | MET   | NA        | NONE     | SPLICE_SITE,NA |                            |
| UCI4216548 | chr7  | 116364823 | rs34822187  | CA         | C          | 47.51            | 45.77 | MET   | NA        | NONE     | SPLICE_SITE,NA |                            |
| UCI1804937 | chr7  | 116340262 | rs33917957  | A          | G          | 48.64            | 44.95 | MET   | N375S     | MISSENSE | NON_SYNON'D    |                            |
| UCI2224680 | chr7  | 116335811 | rs80153920  | A          | T          | 52.77            | 44.75 | MET   | M1L       | MISSENSE | NON_SYNON'NA   |                            |
| AA1025     | chr7  | 116364823 | rs34822187  | CA         | C          | 50.61            | 41.75 | MET   | NA        | NONE     | SPLICE_SITE,NA |                            |
| AA1307     | chr7  | 116364823 | rs34822187  | CA         | C          | 53.04            | 39.38 | MET   | NA        | NONE     | SPLICE_SITE,NA |                            |
| UCI2649875 | chr7  | 116335811 | rs80153920  | A          | T          | 49.57            | 39.05 | MET   | M1L       | MISSENSE | NON_SYNON'NA   |                            |
| UCI2564879 | chr7  | 116364823 | rs34822187  | CA         | C          | 49.12            | 38.22 | MET   | NA        | NONE     | SPLICE_SITE,NA |                            |
| AA926      | chr7  | 116364823 | rs34822187  | CA         | C          | 54.9             | 36.06 | MET   | NA        | NONE     | SPLICE_SITE,NA |                            |
| AA1247     | chr7  | 116364823 | rs34822187  | CA         | C          | 55.77            | 34.4  | MET   | NA        | NONE     | SPLICE_SITE,NA |                            |
| UCI8965412 | chr7  | 116364823 | rs34822187  | CA         | C          | 47.46            | 30.65 | MET   | NA        | NONE     | SPLICE_SITE,NA |                            |
| UCI1951813 | chr7  | 117188715 | rs3034796   | GAAAGC     | G          | 26.08            | 20.38 | CFTR  | NA        | NONE     | FRAME_SHIFT    |                            |
| UCI1821517 | chr7  | 116364823 | rs34822187  | CA         | C          | 45.87            | 18.78 | MET   | NA        | NONE     | SPLICE_SITE,NA |                            |
| AA1077     | chr7  | 116364823 | rs34822187  | CA         | C          | 49.59            | 17.71 | MET   | NA        | NONE     | SPLICE_SITE,NA |                            |
| AA1025     | chr3  | 37053568  | rs1799977   | A          | G          | 48.58            | 47.59 | MLH1  | I121V     | MISSENSE | NON_SYNON'P    |                            |
| AA1090     | chr3  | 37053568  | rs1799977   | A          | G          | 47.8             | 49.69 | MLH1  | I121V     | MISSENSE | NON_SYNON'P    |                            |
| AA1188     | chr3  | 37053568  | rs1799977   | A          | G          | 50.06            | 49.05 | MLH1  | I121V     | MISSENSE | NON_SYNON'P    |                            |
| AA1204     | chr3  | 37053568  | rs1799977   | A          | G          | 54.18            | 53.05 | MLH1  | I121V     | MISSENSE | NON_SYNON'P    |                            |
| AA1267     | chr3  | 37053568  | rs1799977   | A          | G          | 45.84            | 47.46 | MLH1  | I121V     | MISSENSE | NON_SYNON'P    |                            |
| AA1307     | chr3  | 37053568  | rs1799977   | A          | G          | 54.39            | 40.77 | MLH1  | I121V     | MISSENSE | NON_SYNON'P    |                            |
| AA926      | chr3  | 37053568  | rs1799977   | A          | G          | 51.54            | 42.17 | MLH1  | I121V     | MISSENSE | NON_SYNON'P    |                            |
| AA1106     | chr3  | 37053568  | rs1799977   | A          | G          | 53.29            | 56.87 | MLH1  | I121V     | MISSENSE | NON_SYNON'P    |                            |
| AA948      | chr3  | 37053568  | rs1799977   | A          | G          | 45.2             | 50.27 | MLH1  | I121V     | MISSENSE | NON_SYNON'P    |                            |
| AA952      | chr3  | 37053568  | rs1799977   | A          | G          | 99.67            | 98.46 | MLH1  | I121V     | MISSENSE | NON_SYNON'P    |                            |
| AA960      | chr3  | 37053568  | rs1799977   | A          | G          | 59.42            | 48.51 | MLH1  | I121V     | MISSENSE | NON_SYNON'P    |                            |
| AA1515     | chr3  | 37053568  | rs1799977   | A          | G          | 38.87            | 41.96 | MLH1  | I121V     | MISSENSE | NON_SYNON'P    |                            |
| UCI1689380 | chr3  | 37053568  | rs1799977   | A          | G          | 99.72            | 99.46 | MLH1  | I121V     | MISSENSE | NON_SYNON'P    |                            |
| UCI1908503 | chr3  | 37053568  | rs1799977   | A          | G          | 99.78            | 99.32 | MLH1  | I121V     | MISSENSE | NON_SYNON'P    |                            |
| UCI1951813 | chr3  | 37053568  | rs1799977   | A          | G          | 48.8             | 52.74 | MLH1  | I121V     | MISSENSE | NON_SYNON'P    |                            |
| UCI2008866 | chr3  | 37053568  | rs1799977   | A          | G          | 51.78            | 62.92 | MLH1  | I121V     | MISSENSE | NON_SYNON'P    |                            |
| UCI2076630 | chr3  | 37053568  | rs1799977   | A          | G          | 99.76            | 98.94 | MLH1  | I121V     | MISSENSE | NON_SYNON'P    |                            |
| UCI2219330 | chr3  | 37053568  | rs1799977   | A          | G          | 52.72            | 45.46 | MLH1  | I121V     | MISSENSE | NON_SYNON'P    |                            |
| UCI2224680 | chr3  | 37053568  | rs1799977   | A          | G          | 53.73            | 62.69 | MLH1  | I121V     | MISSENSE | NON_SYNON'P    |                            |
| UCI2649875 | chr3  | 37053568  | rs1799977   | A          | G          | 41.73            | 46.78 | MLH1  | I121V     | MISSENSE | NON_SYNON'P    |                            |
| AA930      | chr7  | 55266424  | .           | GA         | G          | 39.25            | 38.46 | EGFR  | NA        | NONE     | FRAME_SHIFT    |                            |
| UCI4216548 | chr3  | 37053568  | rs1799977   | A          | G          | 59.31            | 5.83  | MLH1  | I121V     | MISSENSE | NON_SYNON'P    |                            |
| UCI8965412 | chr3  | 37053568  | rs1799977   | A          | G          | 48.51            | 43.51 | MLH1  | I121V     | MISSENSE | NON_SYNON'P    |                            |
| UCI2008866 | chr2  | 47739551  | rs2303424   | A          | G          | 100              | 99.8  | MSH2  | Q915R     | MISSENSE | NON_SYNON'NA   |                            |
| AA1367     | chr2  | 47739551  | rs2303424   | A          | G          | 99.78            | 99.77 | MSH2  | Q915R     | MISSENSE | NON_SYNON'NA   |                            |
| AA957      | chr2  | 47739551  | rs2303424   | A          | G          | 99.79            | 99.76 | MSH2  | Q915R     | MISSENSE | NON_SYNON'NA   |                            |
| AA1090     | chr2  | 47739551  | rs2303424   | A          | G          | 100              | 99.75 | MSH2  | Q915R     | MISSENSE | NON_SYNON'NA   |                            |
| UCI2564879 | chr2  | 47739551  | rs2303424   | A          | G          | 99.7             | 99.6  | MSH2  | Q915R     | MISSENSE | NON_SYNON'NA   |                            |
| UCI2008866 | chr2  | 47643457  | rs4987188   | G          | A          | 47.73            | 92.67 | MSH2  | G108D     | MISSENSE | NON_SYNON'D    |                            |
| UCI4216548 | chr2  | 47739551  | rs2303424   | A          | G          | 39.23            | 89.66 | MSH2  | Q915R     | MISSENSE | NON_SYNON'NA   |                            |
| AA960      | chr2  | 47739551  | rs2303424   | A          | G          | 48.48            | 68.14 | MSH2  | Q915R     | MISSENSE | NON_SYNON'NA   |                            |
| UCI1689380 | chr2  | 47739551  | rs2303424   | A          | G          | 53.65            | 65.47 | MSH2  | Q915R     | MISSENSE | NON_SYNON'NA   |                            |
| UCI2224680 | chr2  | 47739551  | rs2303424   | A          | G          | 42.5             | 57.51 | MSH2  | Q915R     | MISSENSE | NON_SYNON'NA   |                            |
| UCI1804937 | chr2  | 47739551  | rs2303424   | A          | G          | 45.67            | 56.44 | MSH2  | Q915R     | MISSENSE | NON_SYNON'NA   |                            |
| AA1222     | chr2  | 47739551  | rs2303424   | A          | G          | 58               | 54.4  | MSH2  | Q915R     | MISSENSE | NON_SYNON'NA   |                            |
| UCI9135402 | chr2  | 47739533  | rs116117580 | G          | A          | 52.52            | 52.37 | MSH2  | R909Q     | MISSENSE | NON_SYNON'NA   |                            |
| AA943      | chr2  | 47739551  | rs2303424   | A          | G          | 52.21            | 50.81 | MSH2  | Q915R     | MISSENSE | NON_SYNON'NA   |                            |
| AA1090     | chr2  | 47643457  | rs4987188   | G          | A          | 49.97            | 50.33 | MSH2  | G108D     | MISSENSE | NON_SYNON'D    |                            |
| AA1204     | chr2  | 47739551  | rs2303424   | A          | G          | 48.19            | 50.18 | MSH2  | Q915R     | MISSENSE | NON_SYNON'NA   |                            |
| UCI1821517 | chr2  | 47739551  | rs2303424   | A          | G          | 52.99            | 50.07 | MSH2  | Q915R     | MISSENSE | NON_SYNON'NA   |                            |
| AA1367     | chr2  | 47656972  | rs17224367  | C          | T          | 48.51            | 48.42 | MSH2  | L176F     | MISSENSE | NON_SYNON'D    |                            |
| AA926      | chr2  | 47739551  | rs2303424   | A          | G          | 49.53            | 47.98 | MSH2  | Q915R     | MISSENSE | NON_SYNON'NA   |                            |
| UCI2231576 | chr2  | 47635690  | .           | A          | G          | 52.55            | 46.97 | MSH2  | IVT       | MISSENSE | NON_SYNON'D    |                            |
| UCI2649875 | chr2  | 47739551  | rs2303424   | A          | G          | 55.36            | 46.31 | MSH2  | Q915R     | MISSENSE | NON_SYNON'NA   |                            |
| UCI1951813 | chr2  | 47739551  | rs2303424   |            |            |                  |       |       |           |          |                |                            |

Table S8: List of non-silent germline variants

| Sample     | Chr   | Cord      | rsID        | Ref Allele | Alt Allele | Allelic Fraction |       | Gene   | AA change | Type     | Effect         | Mutation Taster Prediction |
|------------|-------|-----------|-------------|------------|------------|------------------|-------|--------|-----------|----------|----------------|----------------------------|
|            |       |           |             |            |            | Normal           | Tumor |        |           |          |                |                            |
| AA930      | chr2  | 48010488  | rs1042821   | G          | A          | 49.16            | 49.35 | MSH6   | G39E      | MISSENSE | NON_SYNON'N    |                            |
| AA1106     | chr2  | 48010488  | rs1042821   | G          | A          | 48.88            | 49.94 | MSH6   | G39E      | MISSENSE | NON_SYNON'N    |                            |
| UCI2219330 | chr2  | 48026648  | rs63751005  | T          | C          | 54.02            | 52.44 | MSH6   | V207A     | MISSENSE | NON_SYNON'D    |                            |
| UCI9135402 | chr2  | 48018236  | rs3211299   | G          | T          | 49.44            | 49.25 | MSH6   | S142I     | MISSENSE | NON_SYNON'D    |                            |
| AA1204     | chr2  | 48018236  | rs3211299   | G          | T          | 48.46            | 47.02 | MSH6   | S142I     | MISSENSE | NON_SYNON'D    |                            |
| UCI1908503 | chr2  | 48010488  | rs1042821   | G          | A          | 47.68            | 45.73 | MSH6   | G39E      | MISSENSE | NON_SYNON'D    |                            |
| UCI3564897 | chr2  | 48027755  | rs2020912   | T          | C          | 52.14            | 46.15 | MSH6   | V576A     | MISSENSE | NON_SYNON'D    |                            |
| UCI1951813 | chr2  | 48010488  | rs1042821   | G          | A          | 50.88            | 45.49 | MSH6   | G39E      | MISSENSE | NON_SYNON'D    |                            |
| AA1025     | chr2  | 48025785  | rs41557217  | A          | C          | 48.88            | 45.19 | MSH6   | E122D     | MISSENSE | NON_SYNON'D    |                            |
| UCI2219330 | chr2  | 48010488  | rs1042821   | G          | A          | 49.94            | 50.04 | MSH6   | G39E      | MISSENSE | NON_SYNON'D    |                            |
| UCI2564879 | chr2  | 48010488  | rs1042821   | G          | A          | 45.93            | 38.52 | MSH6   | G39E      | MISSENSE | NON_SYNON'N    |                            |
| UCI3564897 | chr2  | 48010488  | rs1042821   | G          | A          | 98.75            | 98.85 | MSH6   | G39E      | MISSENSE | NON_SYNON'N    |                            |
| UCI8965412 | chr2  | 48010488  | rs1042821   | G          | A          | 43.39            | 43.02 | MSH6   | G39E      | MISSENSE | NON_SYNON'N    |                            |
| AA1090     | chr9  | 139401233 | rs61751543  | C          | T          | 99.81            | 99.8  | NOTCH1 | R1279H    | MISSENSE | NON_SYNON'D    |                            |
| AA1267     | chr9  | 139400219 | rs61751542  | G          | A          | 47.25            | 50.16 | NOTCH1 | P1377S    | MISSENSE | NON_SYNON'N    |                            |
| AA1307     | chr9  | 139400219 | rs61751542  | G          | A          | 45.34            | 51.8  | NOTCH1 | P1377S    | MISSENSE | NON_SYNON'N    |                            |
| UCI1689380 | chr9  | 139407858 | .           | C          | T          | 49.8             | 61.97 | NOTCH1 | R780Q     | MISSENSE | NON_SYNON'D    |                            |
| UCI1546879 | chr9  | 139400219 | rs61751542  | G          | A          | 50.26            | 39.83 | NOTCH1 | P1377S    | MISSENSE | NON_SYNON'N    |                            |
| UCI2231576 | chr9  | 139399320 | rs76371972  | C          | T          | 46.27            | 48.66 | NOTCH1 | R1608H    | MISSENSE | NON_SYNON'D    |                            |
| UCI2224680 | chr9  | 139391338 | rs61751489  | C          | T          | 47.32            | 55.38 | NOTCH1 | V2285I    | MISSENSE | NON_SYNON'D    |                            |
| UCI2564879 | chr9  | 139391219 | .           | C          | T          | 52.4             | 59.37 | NOTCH1 | N2324K    | MISSENSE | NON_SYNON'None |                            |
| UCI1908503 | chr9  | 29519780  | .           | CA         | C          | 39.49            | 39.08 | ALK    | NA        | NONE     | FRAME_SHIF NA  |                            |
| UCI1951813 | chr22 | 42524175  | rs5030656   | CCTT       | C          | 42.41            | 36.7  | CYP2D6 | K227-     | NONE     | CODON_DELE NA  |                            |
| UCI1908503 | chr2  | 29451759  | .           | CT         | C          | 43.93            | 42.01 | ALK    | NA        | NONE     | FRAME_SHIF NA  |                            |
| AA1204     | chr2  | 29451759  | .           | CT         | C          | 46               | 46.83 | ALK    | NA        | NONE     | FRAME_SHIF NA  |                            |
| AA1025     | chr2  | 29451759  | .           | CT         | C          | 48.54            | 48.36 | ALK    | NA        | NONE     | FRAME_SHIF NA  |                            |
| AA1077     | chr16 | 23646191  | rs152451    | T          | C          | 47.01            | 51.74 | PALB2  | Q559R     | MISSENSE | NON_SYNON'N    |                            |
| AA1090     | chr16 | 23646857  | rs45494092  | A          | G          | 51.56            | 50.8  | PALB2  | L337S     | MISSENSE | NON_SYNON'N    |                            |
| AA1188     | chr16 | 23646857  | rs45494092  | A          | G          | 50.23            | 45.98 | PALB2  | L337S     | MISSENSE | NON_SYNON'N    |                            |
| AA1204     | chr16 | 23646191  | rs152451    | T          | C          | 46.88            | 48.56 | PALB2  | Q559R     | MISSENSE | NON_SYNON'N    |                            |
| AA1277     | chr16 | 23646191  | rs152451    | T          | C          | 58.07            | 63.29 | PALB2  | Q559R     | MISSENSE | NON_SYNON'N    |                            |
| AA1307     | chr16 | 23646191  | rs152451    | T          | C          | 48.98            | 35.78 | PALB2  | Q559R     | MISSENSE | NON_SYNON'N    |                            |
| UCI2231576 | chr16 | 23634293  | rs45551636  | C          | T          | 50.11            | 54.81 | PALB2  | G998E     | MISSENSE | NON_SYNON'D    |                            |
| AA1277     | chr17 | 41243749  | rs80357508  | CTTGA      | C          | 49.14            | 94.57 | BRCA1  | NA        | NONE     | FRAME_SHIF NA  |                            |
| UCI1908503 | chr16 | 23635370  | rs45624036  | C          | T          | 33.05            | 59.23 | PALB2  | V932M     | MISSENSE | NON_SYNON'N    |                            |
| UCI2008866 | chr16 | 23646191  | rs152451    | T          | C          | 99.66            | 99.88 | PALB2  | Q559R     | MISSENSE | NON_SYNON'N    |                            |
| UCI2076630 | chr16 | 23641461  | rs45532440  | C          | G          | 59.13            | 44.88 | PALB2  | E672Q     | MISSENSE | NON_SYNON'N    |                            |
| UCI2076630 | chr16 | 23646191  | rs152451    | T          | C          | 56.24            | 42.98 | PALB2  | Q559R     | MISSENSE | NON_SYNON'N    |                            |
| UCI2076630 | chr16 | 23634293  | rs45551636  | C          | T          | 46.2             | 42.35 | PALB2  | G998E     | MISSENSE | NON_SYNON'D    |                            |
| UCI2219330 | chr16 | 23646191  | rs152451    | T          | C          | 42.53            | 51.6  | PALB2  | Q559R     | MISSENSE | NON_SYNON'N    |                            |
| UCI2231576 | chr16 | 23641461  | rs45532440  | C          | G          | 53.23            | 53.75 | PALB2  | E672Q     | MISSENSE | NON_SYNON'N    |                            |
| UCI2231576 | chr16 | 23646191  | rs152451    | T          | C          | 51.75            | 47.52 | PALB2  | Q559R     | MISSENSE | NON_SYNON'N    |                            |
| UCI3165498 | chr16 | 23646191  | rs152451    | T          | C          | 99.65            | 99.68 | PALB2  | Q559R     | MISSENSE | NON_SYNON'N    |                            |
| AA1277     | chr5  | 149515397 | rs17110944  | T          | A          | 54.74            | 9.29  | PDGFRB | I29F      | MISSENSE | NON_SYNON'P    |                            |
| AA1307     | chr5  | 149495354 | rs151236133 | C          | T          | 52.15            | 58.89 | PDGFRB | R1098Q    | MISSENSE | NON_SYNON'N    |                            |
| AA926      | chr5  | 149497358 | rs35731372  | C          | T          | 51.38            | 50.47 | PDGFRB | R657Q     | MISSENSE | NON_SYNON'D    |                            |
| UCI1951813 | chr5  | 149497347 | rs140261309 | G          | A          | 59.93            | 48.65 | PDGFRB | R661C     | MISSENSE | NON_SYNON'D    |                            |
| UCI1804937 | chr5  | 149515397 | rs17110944  | T          | A          | 52.59            | 37.15 | PDGFRB | I29F      | MISSENSE | NON_SYNON'P    |                            |
| UCI2231576 | chr5  | 149509446 | rs41287110  | C          | T          | 49.4             | 50.22 | PDGFRB | E155K     | MISSENSE | NON_SYNON'N    |                            |
| UCI2231576 | chr22 | 42524175  | rs5030656   | CCTT       | C          | 51.5             | 52.49 | CYP2D6 | K227-     | NONE     | CODON_DELE NA  |                            |
| AA1025     | chr3  | 178927410 | rs3729680   | A          | G          | 50.42            | 57.7  | PIK3CA | I391M     | MISSENSE | NON_SYNON'P    |                            |
| AA1090     | chr3  | 178927410 | rs3729680   | A          | G          | 46.7             | 54.49 | PIK3CA | I391M     | MISSENSE | NON_SYNON'P    |                            |
| AA952      | chr3  | 178927410 | rs3729680   | A          | G          | 45.64            | 53.97 | PIK3CA | I391M     | MISSENSE | NON_SYNON'P    |                            |
| UCI1951813 | chr3  | 178927410 | rs3729680   | A          | G          | 58.49            | 50.45 | PIK3CA | I391M     | MISSENSE | NON_SYNON'P    |                            |
| UCI3564897 | chr3  | 178927410 | rs3729680   | A          | G          | 52.49            | 7.11  | PIK3CA | I391M     | MISSENSE | NON_SYNON'P    |                            |
| AA1025     | chr5  | 67588148  | rs3730089   | G          | A          | 48.3             | 67.94 | PIK3R1 | M26I      | MISSENSE | NON_SYNON'P    |                            |
| AA1090     | chr5  | 67588148  | rs3730089   | G          | A          | 48.31            | 57.8  | PIK3R1 | M26I      | MISSENSE | NON_SYNON'P    |                            |
| AA943      | chr5  | 67588148  | rs3730089   | G          | A          | 49.17            | 43.67 | PIK3R1 | M26I      | MISSENSE | NON_SYNON'P    |                            |
| AA1188     | chr5  | 67588148  | rs3730089   | G          | A          | 50.44            | 47.13 | PIK3R1 | M26I      | MISSENSE | NON_SYNON'P    |                            |
| AA1247     | chr5  | 67588148  | rs3730089   | G          | A          | 50.39            | 59.94 | PIK3R1 | M26I      | MISSENSE | NON_SYNON'P    |                            |
| AA1267     | chr5  | 67588148  | rs3730089   | G          | A          | 51.34            | 47.99 | PIK3R1 | M26I      | MISSENSE | NON_SYNON'P    |                            |
| AA1277     | chr5  | 67588148  | rs3730089   | G          | A          | 49.56            | 88.46 | PIK3R1 | M26I      | MISSENSE | NON_SYNON'P    |                            |
| AA926      | chr5  | 67588148  | rs3730089   | G          | A          | 51.03            | 47.79 | PIK3R1 | M26I      | MISSENSE | NON_SYNON'P    |                            |
| AA930      | chr5  | 67588148  | rs3730089   | G          | A          | 42.32            | 49.51 | PIK3R1 | M26I      | MISSENSE | NON_SYNON'P    |                            |
| UCI1951813 | chr5  | 67588148  | rs3730089   | G          | A          | 40.93            | 44.23 | PIK3R1 | M26I      | MISSENSE | NON_SYNON'P    |                            |
| UCI2076630 | chr5  | 67588148  | rs3730089   | G          | A          | 50.6             | 34.71 | PIK3R1 | M26I      | MISSENSE | NON_SYNON'P    |                            |
| UCI2219330 | chr5  | 67588148  | rs3730089   | G          | A          | 43.51            | 44.24 | PIK3R1 | M26I      | MISSENSE | NON_SYNON'P    |                            |
| UCI2564879 | chr5  | 67588148  | rs3730089   | G          | A          | 52.3             | 52.28 | PIK3R1 | M26I      | MISSENSE | NON_SYNON'P    |                            |
| UCI8965412 | chr5  | 67588148  | rs3730089   | G          | A          | 55.19            | 40.09 | PIK3R1 | M26I      | MISSENSE | NON_SYNON'P    |                            |
| UCI1689380 | chr5  | 67593246  | rs114163757 | C          | G          | 51.24            | 6.55  | PIK3R1 | D301E     | MISSENSE | NON_SYNON'D    |                            |
| AA1025     | chr7  | 6026988   | rs1805321   | G          | A          | 99.22            | 98.53 | PMS2   | P364S     | MISSENSE | NON_SYNON'N    |                            |
| AA1090     | chr7  | 6026988   | rs1805321   | G          | A          | 49.21            | 83.05 | PMS2   | P364S     | MISSENSE | NON_SYNON'N    |                            |
| AA943      | chr7  | 6026988   | rs1805321   | G          | A          | 51.2             | 51.53 | PMS2   | P364S     | MISSENSE | NON_SYNON'N    |                            |
| AA943      | chr7  | 6045627   | rs10254120  | C          | T          | 47.29            | 50.4  | PMS2   | R20Q      | MISSENSE | NON_SYNON'N    |                            |
| AA1188     | chr7  | 6026988   | rs1805321   | G          | A          | 52.02            | 49.46 | PMS2   | P364S     | MISSENSE | NON_SYNON'N    |                            |
| AA1204     | chr7  | 6026942   | rs1805323   | G          | T          | 47.61            | 38.83 | PMS2   | T379K     | MISSENSE | NON_SYNON'N    |                            |
| AA1204     | chr7  | 6045627   | rs10254120  | C          | T          | 51.38            | 57.01 | PMS2   | R20Q      | MISSENSE | NON_SYNON'N    |                            |
| AA1222     | chr7  | 6026942   | rs1805323   | G          | T          | 53.97            | 51.62 | PMS2   | T379K     | MISSENSE | NON_SYNON'N    |                            |
| AA1247     | chr7  | 6026988   | rs1805321   | G          | A          | 98.71            | 98.43 | PMS2   | P364S     | MISSENSE | NON_SYNON'N    |                            |
| AA1267     | chr7  | 6026708   | rs63750668  | C          | A          | 42.49            | 46.15 | PMS2   | R457L     | MISSENSE | NON_SYNON'N    |                            |
| AA1267     | chr7  | 6026988   | rs1805321   | G          | A          | 48.8             | 48.73 | PMS2   | P364S     | MISSENSE | NON_SYNON'N    |                            |
| AA1277     | chr7  | 6026942   | rs1805323   | G          | T          | 45.49            | 83.37 | PMS2   | T379K     | MISSENSE | NON_SYNON'N    |                            |
| AA1277     | chr7  | 6045627   | rs10254120  | C          | T          | 50.78            | 11.63 | PMS2   | R20Q      | MISSENSE | NON_SYNON'N    |                            |
| AA1367     | chr7  | 6029571   | .           | T          | C          | 51.88            | 61.95 | PMS2   | N229S     | MISSENSE | NON_SYNON'D    |                            |
| AA957      | chr7  | 6026942   | rs1805323   | G          | T          | 99.04            | 99.09 | PMS2   | T379K     | MISSENSE | NON_SYNON'N    |                            |
| AA926      | chr7  | 6026988   | rs1805321   | G          | A          | 39.91            | 59.4  | PMS2   | P364S     | MISSENSE | NON_SYNON'N    |                            |
| AA930      | chr7  | 6026530   | rs1805324   | C          | T          | 53.47            | 49.05 | PMS2   | M516I     | MISSENSE | NON_SYNON'N    |                            |
| AA1106     | chr7  | 6026942   | rs1805323   | G          | T          | 42.28            | 18.4  | PMS2   | T379K     | MISSENSE | NON_SYNON'N    |                            |
| AA1106     | chr7  | 6026988   | rs1805321   | G          | A          | 43.83            | 41.8  | PMS2   | P364S     | MISSENSE | NON_SYNON'N    |                            |
| AA948      | chr7  | 6026988   | rs1805321   | G          | A          | 50.59            | 40.49 | PMS2   | P364S     | MISSENSE | NON_SYNON'N    |                            |
| AA948      | chr7  | 6045627   | rs10254120  | C          | T          | 49.12            | 50.89 | PMS2   | R20Q      | MISSENSE | NON_SYNON'N    |                            |
| AA1367     | chr7  | 6026988   | rs1805321   | G          | A          | 50.61            | 54.41 | PMS2   | P364S     | MISSENSE | NON_SYNON'N    |                            |
| AA960      | chr7  | 6026988   | rs1805321   | G          | A          | 46.44            | 49.21 | PMS2   | P364S     | MISSENSE | NON_SYNON'N    |                            |
| AA1515     | chr7  | 6026988   | rs1805321   | G          | A          | 43.76            | 32.54 | PMS2   | P364S     | MISSENSE | NON_SYNON'N    |                            |
| UCI1546879 | chr7  | 6026988   | rs1805321   | G          | A          | 98.55            | 98.5  | PMS2   | P364S     | MISSENSE | NON_SYNON'N    |                            |
| UCI1689380 | chr7  | 6026942   | rs1805323   | G          | T          | 50.64            | 23.56 | PMS2   | T379K     | MISSENSE | NON_SYNON'N    |                            |
| UCI1804937 | chr7  | 6026942   | rs1805323   | G          | T          | 44.69            | 44.56 | PMS2   | T379K     | MISSENSE | NON_SYNON'N    |                            |
| AA952      | chr7  | 6045634   | rs63750123  | T          | C          | 43.72            | 47.96 | PMS2   | I18V      | MISSENSE | NON_SYNON'D    |                            |
| UCI1821517 | chr7  | 6026988   | rs1805321   | G          | A          | 45.3             | 19.44 | PMS2   | P364S     | MISSENSE | NON_SYNON'N    |                            |
| UCI1908503 | chr7  | 6026865   | rs2228007   | T          | C          | 53.19            | 57.81 | PMS2   | T405A     | MISSENSE | NON_SYNON'N    |                            |

Table S8: List of non-silent germline variants

| Sample     | Chr   | Cord     | rsID        | Ref Allele | Alt Allele | Allelic Fraction |       | Gene   | AA change | Type     | Effect                | Mutation Taster Prediction |
|------------|-------|----------|-------------|------------|------------|------------------|-------|--------|-----------|----------|-----------------------|----------------------------|
|            |       |          |             |            |            | Normal           | Tumor |        |           |          |                       |                            |
| UCI1951813 | chr7  | 6026607  | rs1805318   | T          | A          | 52.73            | 54.34 | PMS2   | T491S     | MISSENSE | NON_SYNON'N           |                            |
| UCI1951813 | chr7  | 6026988  | rs1805321   | G          | A          | 39.28            | 40.8  | PMS2   | P364S     | MISSENSE | NON_SYNON'N           |                            |
| UCI2076630 | chr7  | 6026942  | rs1805323   | G          | T          | 53.01            | 37.03 | PMS2   | T379K     | MISSENSE | NON_SYNON'N           |                            |
| UCI2224680 | chr7  | 6026988  | rs1805321   | G          | A          | 48.62            | 44.58 | PMS2   | P364S     | MISSENSE | NON_SYNON'N           |                            |
| UCI2231576 | chr7  | 6026988  | rs1805321   | G          | A          | 97.81            | 99.34 | PMS2   | P364S     | MISSENSE | NON_SYNON'N           |                            |
| UCI2564879 | chr7  | 6026942  | rs1805323   | G          | T          | 50.11            | 59.79 | PMS2   | T379K     | MISSENSE | NON_SYNON'N           |                            |
| UCI2564879 | chr7  | 6045627  | rs10254120  | C          | T          | 53.21            | 33.11 | PMS2   | R20Q      | MISSENSE | NON_SYNON'N           |                            |
| UCI2649875 | chr7  | 6026988  | rs1805321   | G          | A          | 43.24            | 59.2  | PMS2   | P364S     | MISSENSE | NON_SYNON'N           |                            |
| UCI3165498 | chr7  | 6026988  | rs1805321   | G          | A          | 48.1             | 48.54 | PMS2   | P364S     | MISSENSE | NON_SYNON'N           |                            |
| AA1307     | chr22 | 42524243 | rs35742686  | CT         | C          | 52.02            | 48.38 | CYP2D6 | NA        | NONE     | FRAME_SHIF'NA         |                            |
| UCI3564897 | chr7  | 6026988  | rs1805321   | G          | A          | 99.12            | 99.14 | PMS2   | P364S     | MISSENSE | NON_SYNON'N           |                            |
| UCI1689380 | chr16 | 23619289 | .           | ACT        | A          | 53.98            | 46.5  | PALB2  | E1082fs   | NONE     | FRAME_SHIF'NA         |                            |
| UCI8965412 | chr7  | 6026988  | rs1805321   | G          | A          | 98.2             | 99.21 | PMS2   | P364S     | MISSENSE | NON_SYNON'N           |                            |
| UCI9135402 | chr7  | 6026988  | rs1805321   | G          | A          | 41.23            | 57.86 | PMS2   | P364S     | MISSENSE | NON_SYNON'N           |                            |
| AA1077     | chr17 | 38512480 | rs2229773   | C          | T          | 43.75            | 67.7  | RARA   | R456C     | MISSENSE | NON_SYNON'NA          |                            |
| AA1025     | chr10 | 43595999 | rs146633958 | C          | A          | 51.99            | 51.04 | RET    | L56M      | MISSENSE | NON_SYNON'N           |                            |
| AA1090     | chr10 | 43610119 | rs1799939   | G          | A          | 50.94            | 52.84 | RET    | G691S     | MISSENSE | NON_SYNON'P           |                            |
| AA1307     | chr10 | 43610119 | rs1799939   | G          | A          | 54.07            | 79.21 | RET    | G691S     | MISSENSE | NON_SYNON'P           |                            |
| AA957      | chr10 | 43610119 | rs1799939   | G          | A          | 55.76            | 52.14 | RET    | G691S     | MISSENSE | NON_SYNON'P           |                            |
| AA952      | chr10 | 43610119 | rs1799939   | G          | A          | 59.37            | 50.71 | RET    | G691S     | MISSENSE | NON_SYNON'P           |                            |
| UCI1546879 | chr10 | 43610119 | rs1799939   | G          | A          | 47.28            | 57.23 | RET    | G691S     | MISSENSE | NON_SYNON'P           |                            |
| UCI1821517 | chr10 | 43610119 | rs1799939   | G          | A          | 42.51            | 52    | RET    | G691S     | MISSENSE | NON_SYNON'P           |                            |
| UCI1908503 | chr10 | 43610119 | rs1799939   | G          | A          | 94.98            | 96.12 | RET    | G691S     | MISSENSE | NON_SYNON'P           |                            |
| UCI2224680 | chr10 | 43610119 | rs1799939   | G          | A          | 54.42            | 50.43 | RET    | G691S     | MISSENSE | NON_SYNON'P           |                            |
| UCI2564879 | chr10 | 43610119 | rs1799939   | G          | A          | 49.82            | 44.45 | RET    | G691S     | MISSENSE | NON_SYNON'P           |                            |
| UCI3564897 | chr10 | 43610119 | rs1799939   | G          | A          | 99.51            | 99.29 | RET    | G691S     | MISSENSE | NON_SYNON'P           |                            |
| UCI3564897 | chr10 | 43620335 | rs17158558  | C          | T          | 50.79            | 32.14 | RET    | R892C     | MISSENSE | NON_SYNON'P           |                            |
| UCI4216548 | chr10 | 43610119 | rs1799939   | G          | A          | 44.22            | 47.64 | RET    | G691S     | MISSENSE | NON_SYNON'P           |                            |
| UCI4216548 | chr10 | 43620335 | rs17158558  | C          | T          | 48.88            | 46.29 | RET    | R892C     | MISSENSE | NON_SYNON'P           |                            |
| UCI9135402 | chr10 | 43610119 | rs1799939   | G          | A          | 56.33            | 69.69 | RET    | G691S     | MISSENSE | NON_SYNON'P           |                            |
| AA1025     | chr17 | 7579472  | rs1042522   | G          | C          | 47.54            | 35.9  | TP53   | P72R      | MISSENSE | NON_SYNON'P           |                            |
| AA1077     | chr17 | 7579472  | rs1042522   | G          | C          | 99.62            | 99.73 | TP53   | P72R      | MISSENSE | NON_SYNON'P           |                            |
| AA1090     | chr17 | 7579472  | rs1042522   | G          | C          | 99.68            | 99.32 | TP53   | P72R      | MISSENSE | NON_SYNON'P           |                            |
| AA943      | chr17 | 7579472  | rs1042522   | G          | C          | 99.29            | 99.27 | TP53   | P72R      | MISSENSE | NON_SYNON'P           |                            |
| AA1188     | chr17 | 7579472  | rs1042522   | G          | C          | 99.37            | 99.56 | TP53   | P72R      | MISSENSE | NON_SYNON'P           |                            |
| AA1204     | chr17 | 7579472  | rs1042522   | G          | C          | 99.67            | 99.83 | TP53   | P72R      | MISSENSE | NON_SYNON'P           |                            |
| AA1222     | chr17 | 7579472  | rs1042522   | G          | C          | 50.35            | 26.09 | TP53   | P72R      | MISSENSE | NON_SYNON'P           |                            |
| AA1247     | chr17 | 7579472  | rs1042522   | G          | C          | 49.16            | 87.85 | TP53   | P72R      | MISSENSE | NON_SYNON'P           |                            |
| AA1267     | chr17 | 7579472  | rs1042522   | G          | C          | 99.26            | 99.42 | TP53   | P72R      | MISSENSE | NON_SYNON'P           |                            |
| AA960      | chr17 | 7578146  | rs34949160  | T          | C          | 50.2             | 71.17 | TP53   | R89G      | MISSENSE | NON_SYNONYMOUS_CODING |                            |
| UCI2219330 | chr17 | 7578146  | rs34949160  | T          | C          | 42.59            | 70.49 | TP53   | R89G      | MISSENSE | NON_SYNONYMOUS_CODING |                            |
| AA1277     | chr17 | 7579472  | rs1042522   | G          | C          | 51               | 7.27  | TP53   | P72R      | MISSENSE | NON_SYNON'P           |                            |
| AA1307     | chr17 | 7579472  | rs1042522   | G          | C          | 99.4             | 99.48 | TP53   | P72R      | MISSENSE | NON_SYNON'P           |                            |
| AA957      | chr17 | 7579472  | rs1042522   | G          | C          | 99.21            | 99    | TP53   | P72R      | MISSENSE | NON_SYNON'P           |                            |
| AA926      | chr17 | 7579472  | rs1042522   | G          | C          | 52.15            | 55.16 | TP53   | P72R      | MISSENSE | NON_SYNON'P           |                            |
| AA930      | chr17 | 7579472  | rs1042522   | G          | C          | 51.98            | 51.78 | TP53   | P72R      | MISSENSE | NON_SYNON'P           |                            |
| AA948      | chr17 | 7579472  | rs1042522   | G          | C          | 99.8             | 99.81 | TP53   | P72R      | MISSENSE | NON_SYNON'P           |                            |
| AA952      | chr17 | 7579472  | rs1042522   | G          | C          | 99.41            | 99.69 | TP53   | P72R      | MISSENSE | NON_SYNON'P           |                            |
| AA1367     | chr17 | 7579472  | rs1042522   | G          | C          | 99.3             | 98.83 | TP53   | P72R      | MISSENSE | NON_SYNON'P           |                            |
| AA960      | chr17 | 7579472  | rs1042522   | G          | C          | 47.12            | 16.84 | TP53   | P72R      | MISSENSE | NON_SYNON'P           |                            |
| AA1515     | chr17 | 7579472  | rs1042522   | G          | C          | 52.78            | 50.98 | TP53   | P72R      | MISSENSE | NON_SYNON'P           |                            |
| UCI1546879 | chr17 | 7579472  | rs1042522   | G          | C          | 47.12            | 41.31 | TP53   | P72R      | MISSENSE | NON_SYNON'P           |                            |
| UCI1689380 | chr17 | 7579472  | rs1042522   | G          | C          | 99.55            | 99.45 | TP53   | P72R      | MISSENSE | NON_SYNON'P           |                            |
| UCI1821517 | chr17 | 7579472  | rs1042522   | G          | C          | 44.83            | 25.58 | TP53   | P72R      | MISSENSE | NON_SYNON'P           |                            |
| UCI2008866 | chr17 | 7579472  | rs1042522   | G          | C          | 99.35            | 99.39 | TP53   | P72R      | MISSENSE | NON_SYNON'P           |                            |
| UCI2076630 | chr17 | 7579472  | rs1042522   | G          | C          | 51.26            | 14.78 | TP53   | P72R      | MISSENSE | NON_SYNON'P           |                            |
| UCI2219330 | chr17 | 7579472  | rs1042522   | G          | C          | 47.78            | 30.92 | TP53   | P72R      | MISSENSE | NON_SYNON'P           |                            |
| UCI2224680 | chr17 | 7579472  | rs1042522   | G          | C          | 99.55            | 99.04 | TP53   | P72R      | MISSENSE | NON_SYNON'P           |                            |
| UCI2231576 | chr17 | 7579472  | rs1042522   | G          | C          | 96.6             | 99.33 | TP53   | P72R      | MISSENSE | NON_SYNON'P           |                            |
| UCI2649875 | chr17 | 7579472  | rs1042522   | G          | C          | 97.34            | 97.23 | TP53   | P72R      | MISSENSE | NON_SYNON'P           |                            |
| UCI3165498 | chr17 | 7579472  | rs1042522   | G          | C          | 49.92            | 87.05 | TP53   | P72R      | MISSENSE | NON_SYNON'P           |                            |
| UCI3564897 | chr17 | 7579472  | rs1042522   | G          | C          | 99.68            | 99.67 | TP53   | P72R      | MISSENSE | NON_SYNON'P           |                            |
| UCI8965412 | chr17 | 7579472  | rs1042522   | G          | C          | 99.59            | 99.56 | TP53   | P72R      | MISSENSE | NON_SYNON'P           |                            |
| UCI9135402 | chr17 | 7579472  | rs1042522   | G          | C          | 97.15            | 96.46 | TP53   | P72R      | MISSENSE | NON_SYNON'P           |                            |
| UCI9135402 | chr6  | 18139228 | rs1800460   | C          | T          | 52.39            | 50.13 | TPMT   | A154T     | MISSENSE | NON_SYNON'D           |                            |
| UCI9135402 | chr6  | 18130918 | rs1142345   | T          | C          | 53.78            | 44.31 | TPMT   | Y240C     | MISSENSE | NON_SYNON'D           |                            |

**Table S9: list of predicted deleterious inherited variants in BRCA1 or BRCA2**

| <b>Sample</b> | <b>rsID</b> | <b>Gene</b> | <b>AA change</b> | <b>Type</b> | <b>Allelic Fraction</b> |              |
|---------------|-------------|-------------|------------------|-------------|-------------------------|--------------|
|               |             |             |                  |             | <b>Normal</b>           | <b>Tumor</b> |
| AA1277        | rs80357508  | BRCA1       | Q1355_E1356fs    | FRAMESHIFT  | 49.14                   | 94.57        |
| AA1515        | rs80357087  | BRCA1       | A1373S           | MISSENSE    | 51.47                   | 52           |
| UCI2008866    | rs11571833  | BRCA2       | K3326*           | NONSENSE    | 45.99                   | 12.16        |
